# Supplementary material for: Comprehensive interrogation of the ADAR2 deaminase domain for engineering enhanced RNA editing activity and specificity
Source: eLife. 2022 Jan 19;11:e75555. doi: 10.7554/eLife.75555 (PMC8809894; doi:10.7554/eLife.75555)
Supplement: Figure 1—source data 1. [file elife-75555-fig1-data1.xlsx]

## Sheet: 1d
	name	rep1_edits	rep1_counts	rep1_rate	rep2_edits	rep2_counts	rep2_rate	mean_rate	geom_rate	z-score	std_err	p-value	rep_diverge	r1_FC	r2_FC	r1_L2FC	r2_L2FC
0	D340H	102	638	0.159875	142	909	0.156216	0.157725	0.157714	9.79368	0.00718508	1.19857e-22	0.0231986	1.83015	1.78826	0.871959	0.838557
1	D340K	40	358	0.111732	73	411	0.177616	0.146944	0.143142	5.84988	0.0101862	4.91937e-09	0.448359	1.27904	2.03323	0.355058	1.02378
2	D340R	521	2654	0.196307	500	2204	0.22686	0.210169	0.209623	30.2074	0.00406565	1.8958e-200	0.145373	2.24721	2.59696	1.16813	1.37682
3	D340D	67379	787475	0.0855634	66181	741437	0.0892604	0.0873562	0.0873367	0	0.00032294	1	0.0423221	0.979477	1.0218	-0.0299171	0.031111
4	D340E	170	1809	0.0939746	94	1282	0.0733229	0.0854093	0.0847837	-0.382988	0.00508368	0.701729	0.241796	1.07576	0.839356	0.10536	-0.252646
5	D340C	52	814	0.0638821	115	925	0.124324	0.0960322	0.0910325	1.28056	0.00677512	0.200347	0.629396	0.731283	1.42319	-0.451499	0.509127
6	D340M	70	417	0.167866	50	343	0.145773	0.157895	0.157508	6.88412	0.0102465	5.81439e-12	0.139923	1.92162	1.66871	0.942326	0.738738
7	D340N	50	499	0.1002	35	498	0.0702811	0.0852558	0.0839327	-0.234816	0.00894517	0.814351	0.350936	1.14703	0.804535	0.197906	-0.313773
8	D340Q	89	601	0.148087	25	529	0.047259	0.100885	0.0867566	1.60996	0.00840313	0.107406	0.999431	1.6952	0.540992	0.761458	-0.886322
9	D340S	8	271	0.0295203	36	287	0.125436	0.078853	0.0621267	-0.711261	0.0119551	0.476922	1.21638	0.33793	1.43591	-1.5652	0.521964
10	D340T	65	760	0.0855263	98	840	0.116667	0.101875	0.100669	2.05556	0.00706316	0.0398247	0.305672	0.979053	1.33553	-0.0305417	0.41741
11	D340A	152	1159	0.131148	175	1387	0.126172	0.128437	0.128413	7.33251	0.00560252	2.25877e-13	0.0387424	1.5013	1.44433	0.586209	0.530405
12	D340I	68	1090	0.0623853	109	949	0.114858	0.0868073	0.0828812	-0.0877363	0.00625715	0.930086	0.60447	0.714149	1.31482	-0.485703	0.394866
13	D340L	21	205	0.102439	11	76	0.144737	0.113879	0.112477	1.57443	0.0168459	0.115388	0.371428	1.17266	1.65686	0.229783	0.72845
14	D340V	203	1417	0.14326	66	1040	0.0634615	0.109483	0.101496	3.88058	0.00570195	0.000104208	0.728869	1.63996	0.726469	0.713658	-0.461028
15	D340F	80	586	0.136519	85	456	0.186404	0.158349	0.156454	8.1114	0.00875226	5.00404e-16	0.31503	1.56278	2.13383	0.644117	1.09345
16	D340W	23	238	0.0966387	7	146	0.0479452	0.078125	0.0740309	-0.640588	0.0144106	0.521791	0.623276	1.10626	0.548847	0.14569	-0.865524
17	D340Y	60	374	0.160428	29	347	0.0835735	0.12344	0.117213	3.43034	0.0105189	0.000602824	0.622606	1.83648	0.956698	0.876942	-0.0638648
18	D340G	40	419	0.0954654	55	298	0.184564	0.132497	0.125556	4.27934	0.0105484	1.87448e-05	0.672458	1.09283	2.11277	0.128068	1.07914
19	D340P	25	445	0.0561798	28	570	0.0491228	0.0522167	0.0521005	-3.96405	0.00886454	7.36887e-05	0.135148	0.643111	0.562328	-0.636859	-0.830517
20	N341H	46	681	0.0675477	50	803	0.0622665	0.06469	0.0646367	-3.09127	0.00733233	0.00199302	0.0816389	0.773245	0.712789	-0.371003	-0.488454
21	N341K	29	280	0.103571	33	239	0.138075	0.119461	0.118235	2.58971	0.0123969	0.00960577	0.288831	1.18562	1.5806	0.245644	0.660473
22	N341R	1	61	0.0163934	4	38	0.105263	0.0505051	0.0334704	-1.29856	0.0283785	0.194094	1.75962	0.187662	1.20499	-2.41379	0.269019
23	N341D	53	1286	0.0412131	44	1172	0.0375427	0.039463	0.0394203	-8.40605	0.00569748	4.24063e-17	0.0930087	0.471782	0.429765	-1.08381	-1.21838
24	N341E	36	819	0.043956	27	672	0.0401786	0.0422535	0.0422114	-6.16639	0.00731428	6.98662e-10	0.0894002	0.503182	0.45994	-0.990849	-1.12048
25	N341C	9	317	0.0283912	11	250	0.044	0.0352734	0.034441	-4.39189	0.0118589	1.12368e-05	0.44251	0.325005	0.503685	-1.62147	-0.989407
26	N341M	0	214	0	16	300	0.0533333	0.0311284	0	-4.51445	0.0124551	6.34815e-06	1.71333	0	0.610527	#NAME?	-0.711873
27	N341N	67379	787475	0.0855634	66181	741437	0.0892604	0.0873562	0.0873367	0	0.00032294	1	0.0423221	0.979477	1.0218	-0.0299171	0.031111
28	N341Q	138	1573	0.0877305	110	1316	0.0835866	0.0858429	0.085818	-0.287821	0.00525808	0.773484	0.0482722	1.00428	0.956848	0.00616759	-0.063638
29	N341S	19	422	0.0450237	75	687	0.10917	0.084761	0.0779348	-0.305974	0.00848174	0.759625	0.756794	0.515404	1.24971	-0.956226	0.321598
30	N341T	49	916	0.0534934	16	490	0.0326531	0.0462304	0.045039	-5.46003	0.00753216	4.76064e-08	0.450794	0.61236	0.373792	-0.707548	-1.41969
31	N341A	14	637	0.021978	35	578	0.0605536	0.0403292	0.0355941	-5.80429	0.00810211	6.46375e-09	0.956518	0.251591	0.693181	-1.99085	-0.528697
32	N341I	53	726	0.0730028	17	640	0.0265625	0.0512445	0.0454596	-4.72557	0.00764177	2.29466e-06	0.906248	0.835691	0.304071	-0.258959	-1.71752
33	N341L	18	1119	0.0160858	31	1092	0.0283883	0.0221619	0.0212953	-10.8544	0.00600628	1.90121e-27	0.555118	0.18414	0.324972	-2.44112	-1.62161
34	N341V	60	1147	0.0523104	71	1034	0.0686654	0.0600642	0.0595117	-4.51174	0.00604912	6.42975e-06	0.272292	0.598817	0.786039	-0.739813	-0.347327
35	N341F	0	94	0	0	125	0	0	0	-4.57842	0.01908	4.68507e-06		0	0	#NAME?	#NAME?
36	N341W	0	494	0	0	515	0	0	0	-9.82716	0.00888926	8.60069e-23		0	0	#NAME?	#NAME?
37	N341Y	25	827	0.0302297	12	519	0.0231214	0.0274889	0.0272612	-7.77754	0.00769747	7.39457e-15	0.258591	0.346052	0.264679	-1.53094	-1.91768
38	N341G	2	122	0.0163934	13	198	0.0656566	0.046875	0.0386842	-2.56451	0.0157852	0.0103321	1.05095	0.187662	0.751596	-2.41379	-0.411971
39	N341P	56	663	0.0844646	53	777	0.0682111	0.0756944	0.0752646	-1.56664	0.00744382	0.117199	0.214725	0.966898	0.780838	-0.048564	-0.356904
40	F342H	33	318	0.103774	10	333	0.03003	0.0660522	0.0550322	-1.92478	0.0110683	0.0542563	1.11644	1.18794	0.343765	0.248457	-1.5405
41	F342K	94	741	0.126856	71	531	0.13371	0.129717	0.129673	5.34749	0.00792162	8.91834e-08	0.052841	1.45216	1.53063	0.538205	0.614125
42	F342R	44	794	0.0554156	117	1100	0.106364	0.0850053	0.0809258	-0.362139	0.00649187	0.717248	0.599351	0.634364	1.21759	-0.656617	0.284023
43	F342D	48	569	0.0843585	14	283	0.04947	0.07277	0.0706543	-1.50752	0.00967566	0.131676	0.479436	0.965684	0.566302	-0.0503763	-0.820357
44	F342E	6	330	0.0181818	71	419	0.169451	0.102804	0.0633776	1.49685	0.01032	0.134432	1.47144	0.208134	1.93977	-2.26441	0.955887
45	F342C	85	1330	0.0639098	93	1204	0.0772425	0.0702447	0.0699304	-3.04859	0.00561294	0.00229915	0.189804	0.7316	0.884225	-0.450874	-0.177515
46	F342M	60	792	0.0757576	54	585	0.0923077	0.0827887	0.0823914	-0.600023	0.00761232	0.548491	0.199908	0.867226	1.05668	-0.20552	0.0795408
47	F342N	49	472	0.103814	21	294	0.0714286	0.0913838	0.0899352	0.394682	0.0102046	0.693078	0.354384	1.18839	0.81767	0.249013	-0.290409
48	F342Q	63	610	0.103279	154	792	0.194444	0.154779	0.147652	8.93397	0.00754678	4.10996e-19	0.589006	1.18227	2.22588	0.241561	1.15438
49	F342S	127	1197	0.106099	85	1355	0.0627306	0.0830721	0.0802656	-0.765879	0.00559375	0.443748	0.522052	1.21455	0.718102	0.280423	-0.47774
50	F342T	71	660	0.107576	16	458	0.0349345	0.0778175	0.0678597	-1.1292	0.00844734	0.258815	0.933482	1.23146	0.399909	0.300371	-1.32226
51	F342A	123	1400	0.0878571	91	1469	0.0619469	0.0745904	0.0734638	-2.4197	0.00527577	0.0155332	0.347367	1.00573	0.70913	0.00824948	-0.495878
52	F342I	73	1316	0.0554711	55	1329	0.0413845	0.0483932	0.0478784	-7.09323	0.00549299	1.31017e-12	0.291087	0.634999	0.473744	-0.655173	-1.07782
53	F342L	8	111	0.0720721	11	156	0.0705128	0.071161	0.0711569	-0.937157	0.0172812	0.348678	0.0219116	0.825037	0.807187	-0.27747	-0.309025
54	F342V	216	1562	0.138284	64	946	0.0676533	0.111643	0.105599	4.30314	0.0056439	1.68391e-05	0.632652	1.58299	0.774453	0.662655	-0.36875
55	F342F	67379	787475	0.0855634	66181	741437	0.0892604	0.0873562	0.0873367	0	0.00032294	1	0.0423221	0.979477	1.0218	-0.0299171	0.031111
56	F342W	32	705	0.0453901	87	651	0.133641	0.0877581	0.0762275	0.0523877	0.00767116	0.95822	1.00561	0.519598	1.52983	-0.944533	0.613376
57	F342Y	119	1396	0.0852436	152	1769	0.0859243	0.085624	0.0856233	-0.344788	0.00502402	0.730254	0.00794985	0.975816	0.983608	-0.0353194	-0.0238447
58	F342G	116	853	0.135991	166	1266	0.131122	0.133082	0.13306	7.44702	0.00614009	9.54726e-14	0.0365864	1.55674	1.501	0.638525	0.585924
59	F342P	117	1219	0.0959803	110	1210	0.0909091	0.0934541	0.0934197	1.06347	0.0057339	0.287567	0.0542643	1.09872	1.04067	0.135828	0.0575145
60	S343H	27	563	0.0479574	29	546	0.0531136	0.0504959	0.0504302	-4.3464	0.00848065	1.38391e-05	0.102111	0.548986	0.608011	-0.865158	-0.71783
61	S343K	55	795	0.0691824	146	869	0.168009	0.120793	0.109959	4.82713	0.0069269	1.38516e-06	0.818148	0.791957	1.92327	-0.336505	0.943558
62	S343R	78	577	0.135182	76	524	0.145038	0.139873	0.139786	6.1681	0.00851423	6.91151e-10	0.0704654	1.54748	1.66031	0.629921	0.731451
63	S343D	35	349	0.100287	47	243	0.193416	0.138514	0.13132	4.40699	0.0116082	1.04817e-05	0.672347	1.14802	2.2141	0.199146	1.14672
64	S343E	24	684	0.0350877	83	794	0.104534	0.0723951	0.0630738	-2.03623	0.00734747	0.0417276	0.959267	0.401663	1.19664	-1.31594	0.25899
65	S343C	38	347	0.10951	46	300	0.153333	0.12983	0.128008	3.8251	0.011104	0.000130719	0.337543	1.2536	1.75527	0.326082	0.811689
66	S343M	150	1613	0.0929944	107	1188	0.0900673	0.0917529	0.0917415	0.823324	0.00534019	0.410324	0.0319018	1.06454	1.03104	0.0902341	0.044094
67	S343N	120	1542	0.077821	196	1566	0.12516	0.101673	0.0988729	2.82348	0.00507065	0.00475055	0.465596	0.890847	1.43275	-0.16675	0.518787
68	S343Q	79	962	0.0821206	81	897	0.090301	0.0860678	0.0859709	-0.196631	0.00655267	0.844116	0.0950463	0.940066	1.03371	-0.0891662	0.0478319
69	S343S	67379	787475	0.0855634	66181	741437	0.0892604	0.0873562	0.0873367	0	0.00032294	1	0.0423221	0.979477	1.0218	-0.0299171	0.031111
70	S343T	60	577	0.103986	67	704	0.0951705	0.0991413	0.0990448	1.49315	0.00789273	0.135397	0.0889204	1.19037	1.08945	0.251409	0.123604
71	S343A	140	1379	0.101523	91	1179	0.0771841	0.0903049	0.0894745	0.527725	0.00558755	0.59769	0.269518	1.16217	0.883556	0.216822	-0.178607
72	S343I	120	1249	0.0960769	79	1085	0.0728111	0.0852614	0.0844576	-0.35817	0.00584886	0.720216	0.272876	1.09983	0.833496	0.137279	-0.262752
73	S343L	124	1409	0.0880057	172	1234	0.139384	0.111994	0.109081	4.48106	0.00549819	7.42735e-06	0.458761	1.00743	1.59558	0.0106865	0.674084
74	S343V	35	605	0.0578512	47	485	0.0969072	0.0752294	0.0727783	-1.41752	0.00855499	0.156331	0.519159	0.662245	1.10933	-0.594562	0.149694
75	S343F	44	408	0.107843	59	504	0.117063	0.112939	0.112845	2.73512	0.00935328	0.00623572	0.0816404	1.23452	1.34007	0.303952	0.422309
76	S343W	9	294	0.0306122	5	377	0.0132626	0.0208644	0.0191335	-6.09961	0.010901	1.06324e-09	0.831544	0.35043	0.151822	-1.5128	-2.71955
77	S343Y	19	307	0.0618893	27	374	0.0721925	0.0675477	0.0673509	-1.83042	0.0108218	0.067187	0.152533	0.70847	0.826415	-0.497221	-0.275061
78	S343G	169	2203	0.0767136	173	2081	0.0831331	0.0798319	0.0797675	-1.74194	0.0043195	0.081519	0.0804131	0.87817	0.951657	-0.187428	-0.0714869
79	S343P	46	1600	0.02875	142	1604	0.0885287	0.0586767	0.0504854	-5.74516	0.00499196	9.18366e-09	1.01878	0.329112	1.01342	-1.60335	0.0192348
80	S344H	15	488	0.0307377	9	530	0.0169811	0.0235756	0.0225685	-7.20636	0.0088506	5.74687e-13	0.583508	0.351866	0.19439	-1.5069	-2.36298
81	S344K	48	357	0.134454	12	218	0.0550459	0.104348	0.0958358	1.44269	0.0117777	0.149107	0.760992	1.53914	0.630131	0.622128	-0.666276
82	S344R	147	1348	0.10905	67	1068	0.0627341	0.0885762	0.0854043	0.212195	0.00574905	0.831955	0.522899	1.24834	0.718141	0.320014	-0.477661
83	S344D	67	786	0.0852417	71	687	0.103348	0.0936864	0.0932537	0.859989	0.0073607	0.389795	0.193264	0.975795	1.18306	-0.0353502	0.242527
84	S344E	23	235	0.0978723	61	489	0.124744	0.116022	0.115298	2.73088	0.0104969	0.00631645	0.231611	1.12038	1.428	0.163991	0.513993
85	S344C	25	242	0.103306	20	334	0.0598802	0.078125	0.0752991	-0.784512	0.0117669	0.43274	0.555847	1.18258	0.685472	0.241939	-0.54483
86	S344M	86	1337	0.0643231	90	1105	0.081448	0.0720721	0.0715738	-2.67316	0.00571764	0.00751401	0.237607	0.736331	0.932366	-0.441573	-0.101031
87	S344N	49	920	0.0532609	127	1025	0.123902	0.0904884	0.0831077	0.488907	0.00640653	0.624908	0.78067	0.609698	1.41836	-0.713834	0.504223
88	S344Q	28	630	0.0444444	7	384	0.0182292	0.0345168	0.0317133	-5.95819	0.00886837	2.55041e-09	0.759494	0.508773	0.208676	-0.974907	-2.26066
89	S344S	67379	787475	0.0855634	66181	741437	0.0892604	0.0873562	0.0873367	0	0.00032294	1	0.0423221	0.979477	1.0218	-0.0299171	0.031111
90	S344T	162	1657	0.097767	118	1404	0.0840456	0.0914734	0.0912153	0.805892	0.0051088	0.420305	0.150005	1.11918	0.962102	0.162438	-0.0557381
91	S344A	19	332	0.0572289	31	362	0.0856354	0.0720461	0.0706183	-1.42816	0.0107201	0.153245	0.394281	0.655121	0.980301	-0.610166	-0.0287035
92	S344I	113	853	0.132474	95	942	0.100849	0.115877	0.114806	4.27634	0.00666953	1.89989e-05	0.272912	1.51648	1.15446	0.600723	0.207218
93	S344L	65	575	0.113043	99	1055	0.0938389	0.100613	0.100209	1.89447	0.00699789	0.0581632	0.190875	1.29405	1.07421	0.371896	0.103275
94	S344V	55	584	0.0941781	65	866	0.0750577	0.0827586	0.0822411	-0.619759	0.00741839	0.535416	0.231038	1.07809	0.859215	0.108481	-0.218909
95	S344F	33	333	0.0990991	10	413	0.0242131	0.0576408	0.0454196	-2.87396	0.0103395	0.00405355	1.29919	1.13443	0.277176	0.181962	-1.85112
96	S344W	65	958	0.0678497	96	1009	0.0951437	0.0818505	0.0806989	-0.864279	0.00637028	0.387434	0.333462	0.776701	1.08915	-0.364568	0.123198
97	S344Y	50	420	0.119048	46	532	0.0864662	0.10084	0.0995668	1.47295	0.00915447	0.140764	0.323099	1.36278	0.989811	0.446557	-0.0147744
98	S344G	52	622	0.0836013	50	410	0.121951	0.0988372	0.0971309	1.30574	0.00879269	0.191641	0.388011	0.957016	1.39602	-0.063385	0.481322
99	S344P	17	463	0.0367171	37	539	0.0686456	0.0538922	0.0514098	-3.75078	0.00892189	0.000176286	0.592452	0.420314	0.785813	-1.25046	-0.347742
100	P345H	82	789	0.103929	77	754	0.102122	0.103046	0.103042	2.18146	0.00719232	0.0291493	0.0175359	1.18972	1.16903	0.250617	0.225312
101	P345K	106	1251	0.0847322	86	625	0.1376	0.102345	0.0995866	2.29768	0.00652362	0.0215802	0.516562	0.969962	1.57516	-0.0439995	0.655498
102	P345R	62	980	0.0632653	62	804	0.0771144	0.0695067	0.0691688	-2.66882	0.00668816	0.00761177	0.199249	0.724222	0.882758	-0.465496	-0.179909
103	P345D	82	722	0.113573	57	633	0.0900474	0.102583	0.101902	1.98407	0.00767451	0.0472477	0.229336	1.30012	1.03081	0.378643	0.0437744
104	P345E	35	538	0.0650558	90	552	0.163043	0.114679	0.103599	3.1933	0.00855624	0.00140655	0.854453	0.744718	1.86642	-0.425233	0.900275
105	P345C	90	976	0.0922131	109	936	0.116453	0.104079	0.103374	2.58791	0.00646207	0.00965606	0.232898	1.0556	1.33308	0.0780618	0.414766
106	P345M	51	656	0.0777439	33	677	0.0487445	0.0630158	0.0613337	-3.14634	0.00773614	0.0016533	0.460194	0.889964	0.557997	-0.168181	-0.841672
107	P345N	76	734	0.103542	87	687	0.126638	0.114708	0.114128	3.64943	0.00749479	0.000262822	0.20134	1.18529	1.44967	0.245237	0.535723
108	P345Q	102	1037	0.0983607	39	1009	0.0386521	0.068915	0.0620545	-2.95265	0.00624568	0.00315063	0.866409	1.12597	0.442466	0.171171	-1.17636
109	P345S	103	1257	0.0819411	76	1171	0.0649018	0.0737232	0.0732272	-2.37751	0.00573415	0.0174299	0.231126	0.938012	0.742956	-0.0923223	-0.428652
110	P345T	24	321	0.0747664	28	360	0.0777778	0.0763583	0.0763435	-1.01625	0.0108221	0.309509	0.0394381	0.855879	0.890352	-0.224521	-0.167552
111	P345A	117	1171	0.0999146	71	784	0.0905612	0.0961637	0.0960529	1.37823	0.00639038	0.168131	0.0972652	1.14376	1.03669	0.193785	0.0519834
112	P345I	55	574	0.0958188	39	425	0.0917647	0.0940941	0.0940727	0.753972	0.00893648	0.450866	0.0430857	1.09687	1.05047	0.133399	0.0710293
113	P345L	22	642	0.0342679	9	684	0.0131579	0.0233786	0.0209148	-8.24971	0.00775514	1.58774e-16	0.902964	0.392278	0.150623	-1.35005	-2.73098
114	P345V	1	68	0.0147059	4	126	0.031746	0.0257732	0.0242408	-3.03777	0.0202725	0.00238338	0.661158	0.168344	0.363409	-2.57052	-1.46033
115	P345F	27	628	0.0429936	66	410	0.160976	0.0895954	0.0724226	0.255406	0.00876697	0.79841	1.31683	0.492165	1.84275	-1.02279	0.88186
116	P345W	58	707	0.0820368	52	668	0.0778443	0.08	0.0799725	-0.965671	0.00761775	0.334209	0.0524058	0.939106	0.891114	-0.0906393	-0.166318
117	P345Y	56	545	0.102752	22	319	0.0689655	0.0902778	0.0886868	0.30405	0.00960876	0.76109	0.374254	1.17625	0.789475	0.234189	-0.341035
118	P345G	116	1442	0.0804438	96	1334	0.071964	0.0763689	0.0762509	-2.0486	0.00536336	0.0405016	0.111038	0.920871	0.8238	-0.118928	-0.279634
119	P345P	67379	787475	0.0855634	66181	741437	0.0892604	0.0873562	0.0873367	0	0.00032294	1	0.0423221	0.979477	1.0218	-0.0299171	0.031111
120	H346H	67379	787475	0.0855634	66181	741437	0.0892604	0.0873562	0.0873367	0	0.00032294	1	0.0423221	0.979477	1.0218	-0.0299171	0.031111
121	H346K	42	998	0.0420842	72	783	0.091954	0.064009	0.0593411	-3.48802	0.00669356	0.00048662	0.779107	0.481754	1.05263	-1.05363	0.0740026
122	H346R	77	967	0.0796277	18	732	0.0245902	0.0559152	0.0479959	-4.5881	0.00685273	4.47304e-06	0.984303	0.911529	0.281493	-0.133639	-1.82883
123	H346D	55	593	0.0927487	64	418	0.15311	0.117705	0.114108	3.41613	0.00888404	0.00063519	0.512818	1.06173	1.75271	0.0864175	0.809587
124	H346E	170	1904	0.0892857	118	1396	0.0845272	0.0872727	0.0872409	-0.016972	0.00492049	0.986459	0.0545244	1.02209	0.967616	0.0315193	-0.0474941
125	H346C	296	3738	0.0791867	352	3920	0.0897959	0.0846174	0.0844507	-0.846785	0.0032344	0.397115	0.125378	0.906481	1.02793	-0.141651	0.0397398
126	H346M	119	1104	0.10779	174	1377	0.126362	0.118098	0.117732	5.41719	0.00567477	6.0543e-08	0.157258	1.23391	1.44651	0.303239	0.532577
127	H346N	112	945	0.118519	89	795	0.11195	0.115517	0.115471	4.15725	0.00677395	3.221e-05	0.0568645	1.35673	1.28153	0.44013	0.357868
128	H346Q	142	1429	0.0993702	57	1068	0.0533708	0.0796956	0.0761717	-1.35472	0.00565477	0.175508	0.577188	1.13753	0.610956	0.185903	-0.71086
129	H346S	14	337	0.041543	50	432	0.115741	0.083225	0.0738718	-0.405644	0.0101845	0.685004	0.891532	0.475559	1.32493	-1.0723	0.405915
130	H346T	34	617	0.0551053	34	504	0.0674603	0.0606601	0.0603522	-3.16474	0.00843548	0.00155222	0.203675	0.630812	0.772244	-0.664718	-0.372871
131	H346A	161	1640	0.0981707	151	1533	0.0984997	0.0983297	0.0983295	2.18664	0.00501838	0.0287685	0.0033453	1.1238	1.12756	0.168383	0.173209
132	H346I	44	640	0.06875	32	396	0.0808081	0.0733591	0.0731306	-1.59513	0.00877493	0.110683	0.164371	0.787008	0.925041	-0.34555	-0.112411
133	H346L	174	1613	0.107874	128	1680	0.0761905	0.0917097	0.0903382	0.883779	0.00492595	0.376816	0.345471	1.23487	0.872182	0.304359	-0.197299
134	H346V	97	1298	0.0747304	136	1190	0.114286	0.0936495	0.0915673	1.11078	0.00566563	0.266662	0.422377	0.855467	1.30827	-0.225216	0.387663
135	H346F	125	933	0.133976	64	1058	0.0604915	0.0949272	0.0878053	1.19559	0.00633238	0.231856	0.774119	1.53368	0.692469	0.616997	-0.530178
136	H346W	28	664	0.0421687	45	550	0.0818182	0.0601318	0.0569383	-3.35851	0.0081061	0.000783633	0.659377	0.482721	0.936604	-1.05074	-0.0944886
137	H346Y	70	706	0.0991501	35	800	0.04375	0.0697211	0.0642017	-2.42281	0.0072788	0.0154012	0.794596	1.13501	0.500823	0.182705	-0.997627
138	H346G	95	1511	0.0628723	74	1224	0.0604575	0.0617916	0.0617799	-4.7319	0.00540262	2.2243e-06	0.039079	0.719723	0.69208	-0.474486	-0.530988
139	H346P	127	1528	0.0831152	97	1461	0.0663929	0.0749415	0.0744722	-2.40179	0.00516897	0.0163151	0.223138	0.951451	0.760025	-0.0717981	-0.395882
140	A347H	9	327	0.0275229	0	262	0	0.0152801	0	-6.19484	0.0116349	5.83443e-10	1.80122	0.315066	0	-1.66628	#NAME?
141	A347K	75	1483	0.0505732	76	1361	0.0558413	0.0530942	0.0530292	-6.46725	0.00529777	9.98044e-11	0.0992223	0.57893	0.639237	-0.788538	-0.645578
142	A347R	47	977	0.0481064	7	687	0.0101892	0.0324519	0.025346	-7.93019	0.00692346	2.18812e-15	1.16841	0.550693	0.11664	-0.86068	-3.09987
143	A347D	12	473	0.02537	61	778	0.0784062	0.0583533	0.0511766	-3.63202	0.00798534	0.000281209	0.90888	0.29042	0.897546	-1.78379	-0.155943
144	A347E	32	712	0.0449438	20	555	0.036036	0.0410418	0.0407988	-5.83732	0.0079342	5.30486e-09	0.217042	0.514489	0.412518	-0.958787	-1.27747
145	A347C	106	1231	0.0861089	31	661	0.0468986	0.0724101	0.0696393	-2.30125	0.00649477	0.0213776	0.541502	0.985721	0.536867	-0.0207485	-0.897364
146	A347M	8	509	0.0157171	43	425	0.101176	0.0546039	0.0366741	-3.5443	0.00924085	0.00039365	1.56508	0.17992	1.15821	-2.47458	0.211892
147	A347N	57	879	0.0648464	70	1042	0.0671785	0.0661114	0.0661012	-3.29615	0.00644535	0.000980202	0.0352751	0.742322	0.769018	-0.429883	-0.37891
148	A347Q	122	2066	0.0590513	155	1991	0.0778503	0.0682771	0.0676294	-4.29935	0.00443769	1.713e-05	0.275334	0.675983	0.891183	-0.564941	-0.166207
149	A347S	53	539	0.0983302	46	938	0.0490405	0.0670278	0.0632138	-2.76587	0.00734976	0.0056771	0.735363	1.12562	0.561386	0.170725	-0.832936
150	A347T	42	814	0.0515971	25	785	0.0318471	0.0419012	0.0407144	-6.43559	0.00706307	1.22992e-10	0.471345	0.590651	0.364566	-0.759621	-1.45575
151	A347A	67379	787475	0.0855634	66181	741437	0.0892604	0.0873562	0.0873367	0	0.00032294	1	0.0423221	0.979477	1.0218	-0.0299171	0.031111
152	A347I	188	2489	0.0755323	139	2141	0.0649229	0.0706263	0.0704265	-4.02664	0.0041548	5.65793e-05	0.150219	0.864648	0.743198	-0.209816	-0.428182
153	A347L	84	937	0.0896478	29	932	0.0311159	0.0604601	0.0528902	-4.11628	0.00653408	3.85037e-05	0.968108	1.02623	0.356195	0.0373583	-1.48926
154	A347V	176	2719	0.0647297	202	2356	0.0857385	0.0744828	0.073752	-3.24334	0.0039692	0.00118137	0.282063	0.740986	0.981482	-0.432483	-0.0269663
155	A347F	77	559	0.137746	71	615	0.115447	0.126065	0.125575	4.69472	0.00824512	2.66977e-06	0.176884	1.57683	1.32157	0.657028	0.402251
156	A347W	49	1105	0.0443439	68	1166	0.058319	0.0515192	0.0510411	-6.04562	0.00592778	1.48837e-09	0.271261	0.507622	0.6676	-0.978175	-0.582943
157	A347Y	17	218	0.0779817	31	326	0.095092	0.0882353	0.0878254	0.0726007	0.0121081	0.942124	0.193918	0.892686	1.08855	-0.163775	0.122414
158	A347G	101	1341	0.0753169	121	1361	0.0889052	0.0821614	0.0818798	-0.955559	0.00543648	0.339295	0.165385	0.862182	1.01773	-0.213936	0.025358
159	A347P	10	639	0.0156495	100	1056	0.094697	0.0648968	0.0480386	-3.27342	0.00686116	0.00106253	1.21805	0.179145	1.08403	-2.4808	0.116408
160	R348H	19	419	0.0453461	51	448	0.113839	0.0807382	0.0729628	-0.689966	0.00959186	0.490215	0.848337	0.519094	1.30316	-0.945933	0.382017
161	R348K	20	247	0.0809717	10	198	0.0505051	0.0674157	0.0656327	-1.4896	0.0133865	0.136331	0.451921	0.926914	0.578151	-0.109493	-0.790482
162	R348R	67379	787475	0.0855634	66181	741437	0.0892604	0.0873562	0.0873367	0	0.00032294	1	0.0423221	0.979477	1.0218	-0.0299171	0.031111
163	R348D	13	286	0.0454545	32	315	0.101587	0.0748752	0.0692843	-1.08347	0.0115195	0.278601	0.749684	0.520336	1.16291	-0.942486	0.217738
164	R348E	53	543	0.0976059	14	359	0.0389972	0.0742794	0.0677476	-1.39059	0.00940384	0.164351	0.78903	1.11733	0.446416	0.160058	-1.16354
165	R348C	88	1060	0.0830189	51	765	0.0666667	0.0761644	0.0757256	-1.69241	0.00661295	0.0905669	0.214696	0.950349	0.763159	-0.0734708	-0.389945
166	R348M	57	792	0.0719697	48	716	0.0670391	0.0696286	0.069585	-2.43713	0.00727397	0.0148045	0.0708127	0.823865	0.767422	-0.279521	-0.381907
167	R348N	90	826	0.108959	84	782	0.107417	0.108209	0.108206	2.95958	0.00704583	0.00308055	0.0142498	1.24729	1.22964	0.318801	0.298239
168	R348Q	66	772	0.0854922	131	890	0.147191	0.118532	0.114362	4.49802	0.00693097	6.8589e-06	0.520525	0.978662	1.68495	-0.0311168	0.752708
169	R348S	61	918	0.0664488	121	1290	0.0937984	0.0824275	0.0812742	-0.819666	0.00601306	0.412406	0.331802	0.760665	1.07375	-0.394667	0.102654
170	R348T	108	812	0.133005	79	652	0.121166	0.127732	0.127596	5.46766	0.00738451	4.56011e-08	0.0926883	1.52256	1.38703	0.606498	0.471999
171	R348A	75	566	0.132509	28	425	0.0658824	0.103935	0.0981966	1.84773	0.00897275	0.0646421	0.641037	1.51688	0.754181	0.601107	-0.407018
172	R348I	92	1314	0.0700152	173	1268	0.136435	0.102634	0.097158	2.74666	0.00556216	0.00602053	0.647157	0.801491	1.56183	-0.319242	0.643235
173	R348L	68	766	0.0887728	102	949	0.107482	0.0991254	0.0986821	1.72507	0.00682242	0.0845156	0.188738	1.01622	1.23038	0.0232083	0.299107
174	R348V	8	273	0.029304	5	194	0.0257732	0.0278373	0.027782	-4.55503	0.0130667	5.23791e-06	0.126838	0.335454	0.295036	-1.57581	-1.76104
175	R348F	22	460	0.0478261	86	723	0.118949	0.0912933	0.0834636	0.479396	0.00821259	0.631657	0.779057	0.547484	1.36165	-0.869112	0.445359
176	R348W	112	1148	0.097561	67	719	0.093185	0.0958757	0.0958519	1.30287	0.00653904	0.19262	0.0456424	1.11682	1.06672	0.159394	0.0931873
177	R348Y	36	706	0.0509915	55	530	0.103774	0.0736246	0.0691547	-1.70916	0.00803413	0.0874207	0.716908	0.583719	1.18794	-0.776653	0.248457
178	R348G	89	858	0.10373	32	872	0.0366972	0.0699422	0.0614387	-2.56403	0.00679166	0.0103464	0.958396	1.18743	0.420088	0.247846	-1.25124
179	R348P	50	464	0.107759	74	590	0.125424	0.117647	0.117316	3.48127	0.00870109	0.00049905	0.150153	1.23355	1.43577	0.302821	0.521828
180	R349H	48	948	0.0506329	34	633	0.0537125	0.0518659	0.0518441	-4.99616	0.00710352	5.8483e-07	0.0593756	0.579614	0.614867	-0.786835	-0.701653
181	R349K	52	658	0.0790274	15	558	0.0268817	0.0550987	0.0481808	-3.98277	0.00809927	6.81157e-05	0.946404	0.904657	0.307725	-0.144558	-1.70028
182	R349R	67379	787475	0.0855634	66181	741437	0.0892604	0.0873562	0.0873367	0	0.00032294	1	0.0423221	0.979477	1.0218	-0.0299171	0.031111
183	R349D	55	689	0.0798258	13	861	0.0150987	0.043871	0.0316531	-6.06163	0.00717386	1.34749e-09	1.4754	0.913797	0.172841	-0.130054	-2.53248
184	R349E	43	758	0.0567282	28	1027	0.0272639	0.0397759	0.0372148	-7.11738	0.00668509	1.09996e-12	0.740759	0.64939	0.3121	-0.622843	-1.67992
185	R349C	22	500	0.044	35	738	0.0474255	0.046042	0.046011	-5.14709	0.00802672	2.64557e-07	0.0743989	0.503685	0.542898	-0.989407	-0.881248
186	R349M	251	2596	0.0966872	148	2092	0.0707457	0.0851109	0.0841061	-0.543656	0.00413003	0.586678	0.304797	1.10682	0.809853	0.146415	-0.304268
187	R349N	59	857	0.0688448	118	930	0.126882	0.0990487	0.0946365	1.74939	0.00668374	0.0802242	0.585943	0.788093	1.45246	-0.343562	0.538502
188	R349Q	60	763	0.078637	25	537	0.0465549	0.0653846	0.0633265	-2.80475	0.00783373	0.00503562	0.490666	0.900188	0.532932	-0.151703	-0.907976
189	R349S	36	725	0.0496552	42	694	0.0605187	0.0549683	0.0547002	-4.3196	0.00749791	1.56315e-05	0.197633	0.568422	0.692781	-0.814966	-0.529528
190	R349T	65	1571	0.0413749	74	1486	0.0497981	0.0454694	0.0452748	-8.19751	0.0051097	2.45424e-16	0.18525	0.473635	0.570058	-1.07815	-0.810819
191	R349A	76	1209	0.0628619	89	1276	0.0697492	0.0663984	0.0663089	-3.69774	0.00566775	0.00021753	0.103728	0.719604	0.798446	-0.474725	-0.324733
192	R349I	24	405	0.0592593	9	351	0.025641	0.0436508	0.0401642	-4.2554	0.0102706	2.08679e-05	0.770163	0.678364	0.293523	-0.55987	-1.76846
193	R349L	26	436	0.059633	32	746	0.0428954	0.0490694	0.0484381	-4.66079	0.00821467	3.14997e-06	0.3411	0.682642	0.491041	-0.550799	-1.02609
194	R349V	31	1122	0.0276292	73	1587	0.0459987	0.0383906	0.0372441	-9.02213	0.00542729	1.84465e-19	0.47849	0.316282	0.526565	-1.66071	-0.925316
195	R349F	84	1903	0.0441408	84	2002	0.041958	0.0430218	0.0430079	-9.80516	0.00452155	1.06979e-22	0.0507368	0.505297	0.48031	-0.984796	-1.05796
196	R349W	12	220	0.0545455	23	300	0.0766667	0.0673077	0.0663828	-1.61893	0.0123838	0.105462	0.328658	0.624403	0.877633	-0.679451	-0.188311
197	R349Y	88	831	0.105897	30	642	0.046729	0.0801086	0.0741358	-0.984704	0.0073602	0.32477	0.738591	1.21224	0.534925	0.277673	-0.902593
198	R349G	31	760	0.0407895	54	760	0.0710526	0.0559211	0.0538349	-4.33905	0.00724472	1.431e-05	0.541176	0.466933	0.813367	-1.09871	-0.298022
199	R349P	66	359	0.183844	11	457	0.02407	0.0943627	0.0588764	0.708639	0.00988728	0.478549	1.69319	2.10453	0.275539	1.0735	-1.85967
200	K350H	77	666	0.115616	47	497	0.0945674	0.106621	0.106101	2.3257	0.00828335	0.0200346	0.197412	1.3235	1.08255	0.404354	0.114433
201	K350K	67379	787475	0.0855634	66181	741437	0.0892604	0.0873562	0.0873367	0	0.00032294	1	0.0423221	0.979477	1.0218	-0.0299171	0.031111
202	K350R	34	625	0.0544	29	683	0.0424597	0.0481651	0.0477971	-5.01861	0.00780916	5.2047e-07	0.247903	0.622738	0.486053	-0.683303	-1.04081
203	K350D	10	322	0.0310559	4	187	0.0213904	0.0275049	0.0270804	-4.78198	0.012516	1.73579e-06	0.351411	0.355509	0.244864	-1.49204	-2.02995
204	K350E	94	1988	0.0472837	105	1668	0.0629496	0.0544311	0.0538782	-7.04517	0.00467344	1.85235e-12	0.287812	0.541275	0.720609	-0.885567	-0.472712
205	K350C	180	1461	0.123203	167	1253	0.13328	0.127856	0.127757	7.46292	0.00542674	8.46261e-14	0.0788143	1.41036	1.52571	0.496059	0.60948
206	K350M	46	262	0.175573	32	299	0.107023	0.139037	0.134859	4.33405	0.0119245	1.4639e-05	0.493026	2.00985	1.22514	1.00709	0.292944
207	K350N	29	501	0.0578842	87	673	0.129272	0.0988075	0.0917474	1.389	0.00824423	0.164832	0.722493	0.662623	1.47983	-0.59374	0.565427
208	K350Q	105	846	0.124113	118	821	0.143727	0.133773	0.133414	6.70652	0.00692118	1.99323e-11	0.146619	1.42077	1.6453	0.506678	0.718351
209	K350S	74	398	0.18593	21	288	0.0729167	0.138484	0.125511	4.74102	0.0107841	2.12643e-06	0.816073	2.12841	0.834705	1.08977	-0.260661
210	K350T	85	532	0.159774	65	654	0.0993884	0.126476	0.122975	4.76869	0.00820336	1.85425e-06	0.477452	1.829	1.13774	0.871055	0.186167
211	K350A	70	553	0.126582	69	591	0.116751	0.121503	0.121404	4.08838	0.00835227	4.34393e-05	0.0809113	1.44904	1.3365	0.535093	0.418456
212	K350I	38	297	0.127946	60	291	0.206186	0.166667	0.162026	6.80878	0.0116483	9.84295e-12	0.469437	1.46465	2.36029	0.550554	1.23896
213	K350L	53	236	0.224576	60	234	0.25641	0.240426	0.239898	11.7481	0.0130293	7.22403e-32	0.132407	2.57081	2.93523	1.36222	1.55347
214	K350V	113	1042	0.108445	101	1299	0.0777521	0.0914139	0.0901633	0.694761	0.00584041	0.487205	0.33576	1.24142	0.890058	0.311985	-0.168028
215	K350F	101	633	0.159558	79	748	0.105615	0.13034	0.127603	5.65358	0.00760298	1.57137e-08	0.41386	1.82652	1.20902	0.869096	0.273832
216	K350W	46	1445	0.0318339	46	811	0.0567201	0.0407801	0.0391801	-7.83194	0.00594694	4.80411e-15	0.610253	0.364415	0.649297	-1.45635	-0.62305
217	K350Y	35	493	0.0709939	30	419	0.071599	0.0712719	0.0712713	-1.71986	0.00935208	0.0854571	0.00849045	0.812695	0.819622	-0.299215	-0.28697
218	K350G	43	370	0.116216	104	616	0.168831	0.149087	0.146755	6.86143	0.00899681	6.81745e-12	0.352914	1.33037	1.93268	0.411829	0.950599
219	K350P	43	360	0.119444	129	574	0.224739	0.184154	0.176145	10.4707	0.00924463	1.17744e-25	0.571772	1.36733	2.57267	0.451358	1.36327
220	V351H	28	1023	0.0273705	24	901	0.0266371	0.027027	0.0270245	-9.36979	0.00643869	7.26748e-21	0.0271361	0.31332	0.304925	-1.67429	-1.71347
221	V351K	0	380	0	0	447	0	0	0	-8.89688	0.00981875	5.74375e-19		0	0	#NAME?	#NAME?
222	V351R	3	714	0.00420168	1	552	0.00181159	0.00315956	0.00291151	-10.6094	0.00793604	2.69452e-26	0.756462	0.0480983	0.020738	-4.37787	-5.59158
223	V351D	28	779	0.0359435	18	1119	0.0160858	0.024236	0.0223747	-9.73701	0.00648251	2.09639e-22	0.819347	0.411459	0.18414	-1.28118	-2.44112
224	V351E	5	204	0.0245098	4	255	0.0156863	0.0196078	0.0191277	-5.1403	0.0131799	2.74303e-07	0.45	0.280573	0.179567	-1.83355	-2.47741
225	V351C	73	555	0.131532	10	376	0.0265957	0.0891515	0.0689697	0.193936	0.00925673	0.846226	1.17705	1.50569	0.304452	0.590427	-1.71571
226	V351M	10	464	0.0215517	7	364	0.0192308	0.0205314	0.0204988	-6.80956	0.00981338	9.78958e-12	0.113044	0.246711	0.220142	-2.01911	-2.18349
227	V351N	13	577	0.0225303	6	655	0.00916031	0.0154221	0.0139626	-8.94125	0.0080452	3.84792e-19	0.866941	0.257913	0.104862	-1.95504	-3.25344
228	V351Q	21	1263	0.0166271	16	1164	0.0137457	0.0152452	0.0151767	-12.5792	0.00573258	2.74908e-36	0.189003	0.190337	0.157352	-2.39338	-2.66793
229	V351S	19	1823	0.0104224	32	1453	0.0220234	0.0155678	0.0145237	-14.5482	0.00493452	5.99493e-48	0.745195	0.119309	0.25211	-3.06723	-1.98787
230	V351T	68	1694	0.0401417	57	1442	0.0395284	0.0398597	0.0398585	-9.41513	0.00504471	4.72513e-21	0.0153851	0.459517	0.452497	-1.12181	-1.14402
231	V351A	97	1627	0.0596189	69	1383	0.0498915	0.0551495	0.054934	-6.25385	0.0051499	4.00451e-10	0.176382	0.682481	0.571128	-0.55114	-0.808115
232	V351I	72	1041	0.0691643	50	813	0.0615006	0.0658037	0.0656926	-3.28512	0.00656066	0.00101937	0.116462	0.79175	0.704021	-0.336883	-0.506309
233	V351L	19	1178	0.016129	35	929	0.0376749	0.0256289	0.0234455	-10.0324	0.00615281	1.09822e-23	0.840689	0.184635	0.431279	-2.43725	-1.21331
234	V351V	67379	787475	0.0855634	66181	741437	0.0892604	0.0873562	0.0873367	0	0.00032294	1	0.0423221	0.979477	1.0218	-0.0299171	0.031111
235	V351F	25	718	0.0348189	42	1033	0.0406583	0.0382638	0.0381539	-7.2734	0.00674958	3.50555e-13	0.152607	0.398586	0.465431	-1.32704	-1.10336
236	V351W	11	831	0.0132371	0	507	0	0.00822123	0	-10.251	0.00771976	1.17167e-24	1.61011	0.15153	0	-2.72233	#NAME?
237	V351Y	63	1230	0.0512195	46	976	0.0471311	0.0494107	0.0493687	-6.30922	0.0060143	2.80444e-10	0.0827425	0.586329	0.539528	-0.770217	-0.890229
238	V351G	40	780	0.0512821	5	796	0.00628141	0.0285533	0.0177575	-8.26593	0.00711389	1.38604e-16	1.57602	0.587045	0.0719057	-0.768456	-3.79775
239	V351P	21	568	0.0369718	0	374	0	0.022293	0	-7.07164	0.00920059	1.53118e-12	1.65845	0.423231	0	-1.24048	#NAME?
240	L352H	9	680	0.0132353	20	553	0.0361664	0.0235199	0.0207747	-7.93766	0.00804221	2.06024e-15	0.974966	0.151509	0.41401	-2.72252	-1.27226
241	L352K	0	177	0	0	264	0	0	0	-6.49695	0.0134457	8.19639e-11		0	0	#NAME?	#NAME?
242	L352R	1	400	0.0025	5	472	0.0105932	0.00688073	0.00546227	-8.41596	0.00956225	3.8969e-17	1.17621	0.0286185	0.121265	-5.12691	-3.04377
243	L352D	2	856	0.00233645	0	589	0	0.00138408	0	-11.5737	0.00742825	5.60253e-31	1.68808	0.0267462	0	-5.22452	#NAME?
244	L352E	15	841	0.0178359	19	1108	0.017148	0.0174448	0.0174415	-10.929	0.00639688	8.37803e-28	0.0394326	0.204175	0.1963	-2.29213	-2.34887
245	L352C	28	603	0.0464345	20	474	0.0421941	0.0445682	0.0445181	-4.97218	0.00860548	6.62037e-07	0.095144	0.531554	0.483012	-0.911713	-1.04987
246	L352M	88	1221	0.0720721	116	1284	0.0903427	0.0814371	0.0809215	-1.04841	0.00564583	0.294452	0.224352	0.825037	1.03419	-0.27747	0.0484976
247	L352N	2	219	0.00913242	0	192	0	0.00486618	0	-5.92265	0.0139279	3.16786e-09	1.87671	0.104542	0	-3.25784	#NAME?
248	L352Q	35	1575	0.0222222	32	1141	0.0280456	0.0246686	0.0245047	-11.5668	0.00541961	6.06973e-31	0.236063	0.254386	0.321048	-1.97491	-1.63914
249	L352S	9	331	0.0271903	0	320	0	0.0138249	0	-6.64421	0.011067	3.04847e-11	1.96677	0.311258	0	-1.68382	#NAME?
250	L352T	80	730	0.109589	67	1285	0.0521401	0.0729529	0.0682405	-2.28855	0.00629366	0.0221053	0.787481	1.25451	0.596868	0.327122	-0.744517
251	L352A	21	639	0.0328638	2	596	0.0033557	0.0186235	0.010927	-8.5536	0.00803553	1.19306e-17	1.58446	0.376205	0.038414	-1.41041	-4.70222
252	L352I	71	538	0.13197	29	333	0.0870871	0.114811	0.112579	2.86856	0.00957078	0.00412349	0.390932	1.51071	0.996919	0.595231	-0.00445128
253	L352L	67379	787475	0.0855634	66181	741437	0.0892604	0.0873562	0.0873367	0	0.00032294	1	0.0423221	0.979477	1.0218	-0.0299171	0.031111
254	L352V	38	676	0.056213	79	729	0.108368	0.083274	0.0790214	-0.541683	0.00753617	0.588037	0.626301	0.643492	1.24053	-0.636006	0.310952
255	L352F	5	170	0.0294118	32	220	0.145455	0.0948718	0.0724644	0.525577	0.0142996	0.599182	1.22315	0.336688	1.66507	-1.57052	0.735586
256	L352W	49	2138	0.0229186	14	1590	0.00880503	0.0168991	0.0152403	-15.2308	0.00462597	2.20968e-52	0.835166	0.262358	0.100795	-1.93039	-3.31051
257	L352Y	19	450	0.0422222	0	320	0	0.0246753	0	-6.15949	0.0101763	7.29801e-10	1.71111	0.483334	0	-1.04891	#NAME?
258	L352G	19	960	0.0197917	6	1098	0.00546448	0.0121477	0.00996038	-12.0817	0.006225	1.3199e-33	1.17941	0.226563	0.062554	-2.14202	-3.99875
259	L352P	0	720	0	0	755	0	0	0	-11.8815	0.00735227	1.47644e-32		0	0	#NAME?	#NAME?
260	A353H	15	401	0.0374065	0	491	0	0.0168161	0	-7.46082	0.00945473	8.59843e-14	2.22444	0.428206	0	-1.22362	#NAME?
261	A353K	1	733	0.00136426	0	737	0	0.000680272	0	-11.769	0.00736479	5.64116e-32	2.00546	0.0156172	0	-6.00072	#NAME?
262	A353R	1	641	0.00156006	5	474	0.0105485	0.00538117	0.00351565	-9.69388	0.00845637	3.20129e-22	1.67036	0.0178586	0.120753	-5.80723	-3.04987
263	A353D	8	473	0.0169133	10	536	0.0186567	0.0178394	0.0178181	-7.81983	0.0088898	5.2893e-15	0.0977271	0.193613	0.213571	-2.36875	-2.22722
264	A353E	0	513	0	0	488	0	0	0	-9.78813	0.00892471	1.26615e-22		0	0	#NAME?	#NAME?
265	A353C	60	1238	0.0484653	70	1030	0.0679612	0.0573192	0.0565084	-5.06359	0.00593196	4.11427e-07	0.340128	0.554801	0.777978	-0.849959	-0.3622
266	A353M	5	411	0.0121655	17	304	0.0559211	0.0307692	0.0232693	-5.35834	0.0105606	8.39911e-08	1.42206	0.139263	0.64015	-2.84412	-0.643519
267	A353N	0	951	0	20	1113	0.0179695	0.00968992	0	-12.4949	0.00621585	7.96041e-36	1.85445	0	0.205703	#NAME?	-2.28136
268	A353Q	0	620	0	1	701	0.00142653	0.000757002	0	-11.1468	0.00776901	7.42657e-29	1.88445	0	0.0163301	#NAME?	-5.93632
269	A353S	39	464	0.0840517	3	335	0.00895522	0.0525657	0.0328712	-3.48228	0.00999072	0.000497155	1.42862	0.962172	0.102514	-0.0556327	-3.28611
270	A353T	7	745	0.00939597	30	882	0.0340136	0.0227412	0.0188721	-9.22897	0.00700133	2.73259e-20	1.08251	0.107559	0.389367	-3.2168	-1.3608
271	A353A	67379	787475	0.0855634	66181	741437	0.0892604	0.0873562	0.0873367	0	0.00032294	1	0.0423221	0.979477	1.0218	-0.0299171	0.031111
272	A353I	17	814	0.0208845	2	773	0.00258732	0.0119723	0.00755185	-10.6346	0.00708857	2.05754e-26	1.5283	0.239073	0.0296181	-2.06448	-5.07738
273	A353L	0	631	0	1	521	0.00191939	0.000868056	0	-10.396	0.00831933	2.5843e-25	2.21113	0	0.0219719	#NAME?	-5.50819
274	A353V	5	936	0.00534188	5	698	0.00716332	0.00611995	0.00605515	-11.629	0.00698568	2.93588e-31	0.297624	0.0611506	0.0820013	-4.03149	-3.60821
275	A353F	16	1300	0.0123077	17	1289	0.0131885	0.0127462	0.0127386	-13.4426	0.00555028	3.40474e-41	0.0691048	0.140891	0.150974	-2.82735	-2.72763
276	A353W	0	768	0	1	697	0.00143472	0.000682594	0	-11.7486	0.00737735	7.17806e-32	2.10187	0	0.0164238	#NAME?	-5.92807
277	A353Y	13	1708	0.00761124	0	1398	0	0.00418545	0	-16.4139	0.00506708	1.52026e-60	1.8185	0.0871288	0	-3.52071	#NAME?
278	A353G	87	1360	0.0639706	56	903	0.0620155	0.0631905	0.0631832	-4.06916	0.00593877	4.71831e-05	0.0309396	0.732296	0.709915	-0.449501	-0.494281
279	A353P	2	2391	0.00083647	1	2235	0.000447427	0.000648508	0.000618256	-20.8831	0.00415204	7.62058e-97	0.599904	0.00957539	0.00512187	-6.70645	-7.60911
280	G354H	2	896	0.00223214	0	1125	0	0.000989609	0	-13.75	0.00628123	5.09643e-43	2.25558	0.0255522	0	-5.29041	#NAME?
281	G354K	5	1109	0.00450857	15	1150	0.0130435	0.00885347	0.00774288	-13.2125	0.00594155	7.43032e-40	0.964018	0.0516113	0.149314	-4.27617	-2.74358
282	G354R	11	1012	0.0108696	3	875	0.00342857	0.00741918	0.0063658	-12.2967	0.00650067	9.42945e-35	1.00294	0.124428	0.0392482	-3.00662	-4.67123
283	G354D	28	1208	0.0231788	5	1250	0.004	0.0134255	0.00948542	-12.9788	0.00569624	1.61284e-38	1.42853	0.265337	0.0457895	-1.9141	-4.44884
284	G354E	0	748	0	1	744	0.00134409	0.000670241	0	-11.8581	0.0073103	1.95427e-32	2.00538	0	0.0153863	#NAME?	-6.02221
285	G354C	7	911	0.00768386	3	829	0.00361882	0.00574713	0.00536758	-12.0553	0.00676957	1.81911e-33	0.707318	0.0879601	0.041426	-3.50701	-4.59332
286	G354M	18	871	0.0206659	3	782	0.00383632	0.0127042	0.00931693	-10.748	0.00694568	6.05661e-27	1.32473	0.236571	0.0439158	-2.07966	-4.50912
287	G354N	0	651	0	0	443	0	0	0	-10.2327	0.00853697	1.41522e-24		0	0	#NAME?	#NAME?
288	G354Q	13	848	0.0153302	0	1090	0	0.00670795	0	-12.5727	0.00641455	2.98306e-36	2.28538	0.175491	0	-2.51053	#NAME?
289	G354S	16	732	0.0218579	11	353	0.0311615	0.0248848	0.024531	-7.28693	0.00857309	3.17106e-13	0.373865	0.250216	0.356717	-1.99875	-1.48715
290	G354T	0	920	0	1	1031	0.000969932	0.000512558	0	-13.5844	0.00639289	4.95401e-42	1.89234	0	0.0111032	#NAME?	-6.49288
291	G354A	17	633	0.0268562	3	537	0.00558659	0.017094	0.0130639	-8.51083	0.00825563	1.72693e-17	1.24427	0.307434	0.0639519	-1.70165	-3.96687
292	G354I	1	1783	0.000560852	18	1755	0.0102564	0.00537027	0.00237098	-17.2681	0.00474782	8.17696e-67	1.80541	0.00642029	0.117409	-7.28314	-3.09038
293	G354L	0	685	0	1	811	0.00123305	0.000668449	0	-11.8742	0.00730052	1.6117e-32	1.84464	0	0.0141151	#NAME?	-6.14661
294	G354V	18	1110	0.0162162	0	882	0	0.00903614	0	-12.3785	0.00632713	3.41823e-35	1.79459	0.185633	0	-2.42947	#NAME?
295	G354F	0	1243	0	3	1041	0.00288184	0.00131349	0	-14.5623	0.00590861	4.88038e-48	2.19404	0	0.0329896	#NAME?	-4.92185
296	G354W	15	1420	0.0105634	0	1143	0	0.00585252	0	-14.6116	0.00557802	2.36945e-48	1.80493	0.120923	0	-3.04784	#NAME?
297	G354Y	2	543	0.00368324	0	475	0	0.00196464	0	-9.64883	0.00884994	4.97196e-22	1.87477	0.0421635	0	-4.56786	#NAME?
298	G354G	67379	787475	0.0855634	66181	741437	0.0892604	0.0873562	0.0873367	0	0.00032294	1	0.0423221	0.979477	1.0218	-0.0299171	0.031111
299	G354P	5	261	0.0191571	0	222	0	0.010352	0	-5.99345	0.0128481	2.05436e-09	1.85057	0.219299	0	-2.18903	#NAME?
300	V355H	0	1630	0	13	1668	0.00779376	0.00394178	0	-16.9631	0.00491741	1.54005e-64	1.97722	0	0.0892182	#NAME?	-3.48652
301	V355K	0	382	0	0	582	0	0	0	-9.60554	0.00909436	7.57606e-22		0	0	#NAME?	#NAME?
302	V355R	15	1678	0.00893921	12	1169	0.0102652	0.00948367	0.00946158	-14.713	0.00529276	5.31672e-49	0.139816	0.102331	0.11751	-3.28869	-3.08915
303	V355D	0	935	0	10	1173	0.00852515	0.00474383	0	-13.432	0.00615043	3.92832e-41	1.7971	0	0.0975907	#NAME?	-3.35711
304	V355E	21	1002	0.0209581	9	847	0.0106257	0.016225	0.0153539	-10.8308	0.00656747	2.45893e-27	0.636817	0.239915	0.121637	-2.0594	-3.03935
305	V355C	38	800	0.0475	48	954	0.0503145	0.0490308	0.0490107	-5.68269	0.00674424	1.3259e-08	0.057402	0.543751	0.575969	-0.878983	-0.795937
306	V355M	56	2147	0.0260829	19	1881	0.010101	0.0186197	0.016748	-15.4444	0.00445059	8.23306e-54	0.858334	0.298581	0.11563	-1.74381	-3.11241
307	V355N	7	459	0.0152505	0	630	0	0.00642792	0	-9.45784	0.00855675	3.14381e-21	2.37255	0.174579	0	-2.51805	#NAME?
308	V355Q	6	702	0.00854701	3	587	0.00511073	0.00698216	0.00676256	-10.2191	0.00786506	1.62787e-24	0.492151	0.0978409	0.0585045	-3.35342	-4.09531
309	V355S	14	543	0.0257827	7	720	0.00972222	0.0166271	0.0147866	-8.90132	0.00794592	5.51852e-19	0.965922	0.295144	0.111294	-1.76051	-3.16755
310	V355T	53	899	0.0589544	58	709	0.0818054	0.0690299	0.0681152	-2.60158	0.00704433	0.00927952	0.33103	0.674874	0.936457	-0.567311	-0.0947147
311	V355A	13	242	0.053719	1	232	0.00431034	0.0295359	0.0156271	-4.45806	0.0129699	8.27067e-06	1.67284	0.614942	0.0493422	-0.701477	-4.34103
312	V355I	71	1156	0.0614187	89	796	0.111809	0.0819672	0.0784146	-0.842735	0.00639469	0.399377	0.614762	0.703083	1.27992	-0.508232	0.356055
313	V355L	16	634	0.0252366	3	641	0.00468019	0.014902	0.0108178	-9.1617	0.00790838	5.10842e-20	1.37944	0.288893	0.0535759	-1.79139	-4.22227
314	V355V	67379	787475	0.0855634	66181	741437	0.0892604	0.0873562	0.0873367	0	0.00032294	1	0.0423221	0.979477	1.0218	-0.0299171	0.031111
315	V355F	0	886	0	11	998	0.011022	0.00583864	0	-12.53	0.00650577	5.11369e-36	1.88778	0	0.126174	#NAME?	-2.98652
316	V355W	10	382	0.026178	0	364	0	0.0134048	0	-7.15309	0.0103384	8.48485e-13	1.95288	0.29967	0	-1.73855	#NAME?
317	V355Y	20	969	0.0206398	0	849	0	0.0110011	0	-11.5288	0.006623	9.44684e-31	1.87616	0.236272	0	-2.08148	#NAME?
318	V355G	4	472	0.00847458	0	272	0	0.00537634	0	-7.91918	0.0103521	2.39082e-15	1.57627	0.0970117	0	-3.3657	#NAME?
319	V355P	0	1607	0	5	1521	0.00328731	0.00159847	0	-16.9848	0.0050491	1.06484e-64	2.05654	0	0.0376311	#NAME?	-4.73193
320	V356H	0	617	0	3	590	0.00508475	0.0024855	0	-10.4422	0.00812765	1.59033e-25	2.04576	0	0.058207	#NAME?	-4.10266
321	V356K	6	1082	0.00554529	0	701	0	0.00336511	0	-12.5597	0.00668736	3.51772e-36	1.64787	0.063479	0	-3.97758	#NAME?
322	V356R	0	480	0	0	389	0	0	0	-9.11999	0.00957854	7.51308e-20		0	0	#NAME?	#NAME?
323	V356D	17	783	0.0217114	16	639	0.0250391	0.0232068	0.0231482	-8.56599	0.00748886	1.07151e-17	0.143396	0.248538	0.286632	-2.00846	-1.80273
324	V356E	0	817	0	3	596	0.00503356	0.00212314	0	-11.3464	0.00751191	7.72784e-30	2.37081	0	0.0576211	#NAME?	-4.11726
325	V356C	103	1137	0.0905893	108	1231	0.0877335	0.0891047	0.0890933	0.301103	0.00580696	0.763336	0.032049	1.03701	1.00432	0.0524301	0.00621855
326	V356M	43	1912	0.0224895	23	1812	0.0126932	0.0177229	0.0170259	-15.0445	0.0046285	3.75298e-51	0.552753	0.257446	0.145303	-1.95766	-2.78286
327	V356N	9	1003	0.00897308	21	1097	0.0191431	0.0142857	0.0133304	-11.8572	0.00616255	1.97501e-32	0.711903	0.102718	0.219139	-3.28323	-2.19008
328	V356Q	0	568	0	0	501	0	0	0	-10.1151	0.00863621	4.73481e-24		0	0	#NAME?	#NAME?
329	V356S	0	394	0	0	411	0	0	0	-8.77775	0.00995201	1.66774e-18		0	0	#NAME?	#NAME?
330	V356T	3	359	0.00835655	0	366	0	0.00413793	0	-7.93553	0.0104868	2.09596e-15	2.0195	0.0956606	0	-3.38593	#NAME?
331	V356A	59	582	0.101375	65	659	0.0986343	0.0999194	0.0999101	1.56671	0.00801883	0.117182	0.0274249	1.16047	1.1291	0.214714	0.175179
332	V356I	47	1158	0.0405872	95	1259	0.0754567	0.0587505	0.0560622	-4.97797	0.00574647	6.42552e-07	0.593518	0.464618	0.863782	-1.10588	-0.211261
333	V356L	3	246	0.0121951	4	243	0.0164609	0.0143149	0.0141553	-5.72016	0.0127691	1.06422e-08	0.297995	0.139602	0.188434	-2.84061	-2.40787
334	V356V	67379	787475	0.0855634	66181	741437	0.0892604	0.0873562	0.0873367	0	0.00032294	1	0.0423221	0.979477	1.0218	-0.0299171	0.031111
335	V356F	16	906	0.01766	5	773	0.00646831	0.0125074	0.0111216	-10.8607	0.00689169	1.77333e-27	0.894806	0.202161	0.0740452	-2.30642	-3.75545
336	V356W	2	859	0.00232829	16	933	0.017149	0.0100446	0.00658481	-11.5895	0.00667082	4.65767e-31	1.47548	0.0266528	0.196311	-5.22957	-2.34879
337	V356Y	11	1740	0.00632184	5	1377	0.00363108	0.00513314	0.00494837	-16.2554	0.00505819	2.04385e-59	0.524193	0.0723685	0.0415664	-3.78849	-4.58844
338	V356G	10	1636	0.00611247	6	762	0.00787402	0.00667223	0.00662467	-13.9913	0.00576672	1.76136e-44	0.264012	0.0699718	0.0901369	-3.83708	-3.47174
339	V356P	5	305	0.0163934	1	469	0.0021322	0.00775194	0.00476321	-7.84314	0.0101495	4.39412e-15	1.8397	0.187662	0.0244081	-2.41379	-5.3565
340	M357H	0	782	0	0	662	0	0	0	-11.756	0.00743077	6.57621e-32		0	0	#NAME?	#NAME?
341	M357K	38	1575	0.024127	50	1720	0.0290698	0.0267071	0.0265921	-12.3248	0.00492089	6.65952e-35	0.185074	0.276191	0.332773	-1.85626	-1.58739
342	M357R	1	367	0.0027248	18	807	0.0223048	0.016184	0.0115603	-8.63581	0.00824152	5.83105e-18	1.20984	0.0311918	0.255332	-5.00269	-1.96955
343	M357D	0	1061	0	1	1093	0.000914913	0.000464253	0	-14.2815	0.00608423	2.85334e-46	1.97072	0	0.0104734	#NAME?	-6.57713
344	M357E	18	1313	0.0137091	12	1225	0.00979592	0.0118203	0.0116562	-13.4748	0.00560571	2.2001e-41	0.331052	0.156933	0.112138	-2.67178	-3.15666
345	M357C	69	1563	0.0441459	53	1033	0.0513069	0.0469954	0.0468671	-7.27948	0.00554447	3.35099e-13	0.152377	0.505355	0.587329	-0.984632	-0.767758
346	M357M	67379	787475	0.0855634	66181	741437	0.0892604	0.0873562	0.0873367	0	0.00032294	1	0.0423221	0.979477	1.0218	-0.0299171	0.031111
347	M357N	1	641	0.00156006	0	448	0	0.000918274	0	-10.1019	0.00855657	5.41624e-24	1.69891	0.0178586	0	-5.80723	#NAME?
348	M357Q	172	1863	0.0923242	134	1521	0.0880999	0.0904255	0.090401	0.631627	0.00485935	0.527631	0.0467155	1.05687	1.00851	0.0797989	0.0122308
349	M357S	1	1610	0.000621118	32	1511	0.021178	0.0105735	0.00342942	-15.1887	0.00505524	4.19898e-52	1.94419	0.00711018	0.242433	-7.1359	-2.04434
350	M357T	5	1491	0.00335345	20	1448	0.0138122	0.00850629	0.00673565	-15.1366	0.00520924	9.29624e-52	1.22952	0.0383883	0.158113	-4.70319	-2.66097
351	M357A	7	552	0.0126812	19	798	0.0238095	0.0192593	0.0184027	-8.86014	0.00768577	7.99144e-19	0.577819	0.145166	0.272557	-2.78422	-1.87537
352	M357I	47	1326	0.0354449	39	1086	0.0359116	0.0356551	0.0356543	-8.98943	0.00575133	2.48507e-19	0.013088	0.405752	0.411094	-1.30133	-1.28246
353	M357L	37	736	0.0502717	50	745	0.0671141	0.0587441	0.0581367	-3.89836	0.00733953	9.68449e-05	0.286707	0.57548	0.768281	-0.797163	-0.380294
354	M357V	60	993	0.060423	47	1054	0.044592	0.0522716	0.051673	-5.61944	0.00624344	1.91577e-08	0.302859	0.691685	0.510462	-0.531813	-0.970124
355	M357F	3	696	0.00431034	1	644	0.0015528	0.00298507	0.00263886	-10.9377	0.00771382	7.61328e-28	0.923779	0.0493422	0.0177754	-4.34103	-5.81397
356	M357W	11	779	0.0141207	0	849	0	0.00675676	0	-11.5166	0.00699856	1.08845e-30	2.08986	0.161645	0	-2.6291	#NAME?
357	M357Y	13	1150	0.0113043	8	1164	0.00687285	0.00907519	0.00880111	-13.3346	0.00587054	1.4573e-40	0.488309	0.129405	0.0786762	-2.95003	-3.66793
358	M357G	9	429	0.020979	0	460	0	0.0101237	0	-8.15508	0.00947048	3.48957e-16	2.07226	0.240155	0	-2.05796	#NAME?
359	M357P	0	1097	0	2	1033	0.00193611	0.000938967	0	-14.1241	0.00611843	2.69812e-45	2.06196	0	0.0221634	#NAME?	-5.49568
360	T358H	6	1329	0.00451467	8	1405	0.00569395	0.0051207	0.00508652	-15.2266	0.00540077	2.35456e-52	0.230296	0.0516812	0.0651808	-4.27422	-3.93941
361	T358K	9	1133	0.00794351	10	1073	0.00931966	0.00861287	0.00858545	-13.0967	0.00601247	3.43976e-39	0.159778	0.0909324	0.106686	-3.45906	-3.22856
362	T358R	19	703	0.027027	10	551	0.0181488	0.023126	0.0226885	-8.05436	0.00797459	7.98956e-16	0.383906	0.309389	0.207757	-1.69251	-2.26703
363	T358D	0	559	0	0	649	0	0	0	-10.7526	0.0081242	5.76161e-27		0	0	#NAME?	#NAME?
364	T358E	4	510	0.00784314	11	428	0.0257009	0.0159915	0.01348	-7.74021	0.00922	9.9251e-15	1.11671	0.0897834	0.294208	-3.47741	-1.76509
365	T358C	111	2032	0.054626	186	2356	0.0789474	0.0676846	0.0665692	-4.60978	0.00426737	4.03087e-06	0.359334	0.625325	0.903741	-0.677323	-0.146019
366	T358M	124	1290	0.096124	32	1035	0.0309179	0.0670968	0.0580144	-3.45765	0.00585932	0.000544909	0.971823	1.10037	0.353929	0.137987	-1.49847
367	T358N	52	2001	0.025987	72	2109	0.0341394	0.0301703	0.0298926	-12.977	0.00440671	1.65218e-38	0.270212	0.297483	0.390807	-1.74912	-1.35547
368	T358Q	71	651	0.109063	39	578	0.067474	0.0895037	0.0870163	0.266513	0.00805749	0.789844	0.464662	1.24849	0.772401	0.320179	-0.372577
369	T358S	198	1987	0.0996477	160	1809	0.0884467	0.0943098	0.0941431	1.51529	0.00458893	0.129699	0.118769	1.14071	1.01248	0.189927	0.0178975
370	T358T	67379	787475	0.0855634	66181	741437	0.0892604	0.0873562	0.0873367	0	0.00032294	1	0.0423221	0.979477	1.0218	-0.0299171	0.031111
371	T358A	80	1722	0.0464576	78	1411	0.0552799	0.0504309	0.0502417	-7.3153	0.00504768	2.56798e-13	0.174939	0.531818	0.632811	-0.910995	-0.660154
372	T358I	38	705	0.0539007	90	1024	0.0878906	0.0740312	0.0720042	-1.96135	0.00679378	0.0498379	0.459129	0.617022	1.00612	-0.696606	0.00879919
373	T358L	118	1262	0.0935024	85	1020	0.0833333	0.0889571	0.0888121	0.270628	0.00591519	0.786677	0.114314	1.07036	0.953949	0.0980929	-0.0680164
374	T358V	87	962	0.0904366	28	812	0.0344828	0.0648253	0.058167	-3.35944	0.00670678	0.00078102	0.863149	1.03526	0.394737	0.0499965	-1.34103
375	T358F	68	1042	0.0652591	53	754	0.0702918	0.0673719	0.0673265	-2.99807	0.00666571	0.00271692	0.0746996	0.747046	0.804657	-0.420731	-0.313554
376	T358W	13	1064	0.012218	14	946	0.0147992	0.0134328	0.0133714	-11.7359	0.00629893	8.34612e-32	0.192149	0.139865	0.169412	-2.8379	-2.5614
377	T358Y	6	610	0.00983607	8	775	0.0103226	0.0101083	0.0101054	-10.1806	0.00758773	2.41983e-24	0.0481302	0.112597	0.118167	-3.15076	-3.08111
378	T358G	26	1420	0.0183099	23	1137	0.0202287	0.0191631	0.0191395	-12.2096	0.0055852	2.76208e-34	0.100131	0.2096	0.231565	-2.25429	-2.11051
379	T358P	11	1137	0.00967458	5	1331	0.00375657	0.00648298	0.00580851	-14.2273	0.00568437	6.20196e-46	0.912853	0.110749	0.0430029	-3.17464	-4.53942
380	T359H	38	456	0.0833333	22	405	0.054321	0.0696864	0.0681393	-1.83585	0.00962489	0.0663804	0.416327	0.953949	0.621833	-0.0680164	-0.6854
381	T359K	183	1648	0.111044	46	1219	0.0377358	0.0798744	0.0701768	-1.41758	0.00527787	0.156314	0.917789	1.27116	0.431977	0.346145	-1.21097
382	T359R	33	478	0.0690377	72	678	0.106195	0.0908304	0.0888735	0.418184	0.00830785	0.675812	0.409081	0.790301	1.21565	-0.339527	0.28173
383	T359D	202	1289	0.156711	102	1119	0.0911528	0.126246	0.121826	6.75126	0.00576035	1.46563e-11	0.519287	1.79393	1.04346	0.843121	0.0613771
384	T359E	63	1572	0.0400763	80	1285	0.0622568	0.0500525	0.0488572	-7.05766	0.00528556	1.69326e-12	0.443144	0.458769	0.712678	-1.12416	-0.488678
385	T359C	133	1226	0.108483	126	1241	0.101531	0.104986	0.104928	3.09824	0.00569019	0.00194675	0.066217	1.24185	1.16226	0.312485	0.216939
386	T359M	103	1132	0.0909894	102	1196	0.0852843	0.0880584	0.0880123	0.119898	0.00585651	0.904564	0.0647879	1.04159	0.976282	0.0587884	-0.0346302
387	T359N	61	595	0.102521	59	625	0.0944	0.0983607	0.098277	1.36068	0.00808743	0.173614	0.0825636	1.1736	1.08063	0.230938	0.111877
388	T359Q	195	1885	0.103448	173	1726	0.100232	0.101911	0.101898	3.09333	0.00470515	0.00197921	0.0315622	1.18421	1.14739	0.243928	0.198358
389	T359S	35	534	0.0655431	17	429	0.039627	0.0539979	0.0523809	-3.66547	0.00910068	0.000246881	0.479945	0.750297	0.453626	-0.414467	-1.14042
390	T359T	67379	787475	0.0855634	66181	741437	0.0892604	0.0873562	0.0873367	0	0.00032294	1	0.0423221	0.979477	1.0218	-0.0299171	0.031111
391	T359A	173	2309	0.0749242	198	2519	0.0786026	0.0768434	0.0768214	-2.58342	0.00406934	0.00978258	0.0478689	0.857686	0.899794	-0.221478	-0.152333
392	T359I	206	2097	0.0982356	150	1549	0.0968367	0.0976413	0.0976388	2.19656	0.00468232	0.0280518	0.014327	1.12454	1.10853	0.169335	0.148643
393	T359L	94	1469	0.0639891	124	1464	0.0846995	0.0743266	0.073602	-2.49706	0.00521797	0.0125226	0.27864	0.732508	0.969587	-0.449084	-0.0445574
394	T359V	87	1632	0.0533088	141	1849	0.0762574	0.0654984	0.0644743	-4.5633	0.00478991	5.03558e-06	0.350369	0.610247	0.872948	-0.712536	-0.196032
395	T359F	93	1487	0.062542	128	1341	0.0954512	0.0781471	0.0764253	-1.733	0.00531399	0.0830961	0.421118	0.715943	1.09267	-0.482084	0.127853
396	T359W	40	557	0.0718133	45	438	0.10274	0.0854271	0.0840758	-0.215442	0.00895415	0.829423	0.362021	0.822074	1.1761	-0.282659	0.234012
397	T359Y	97	687	0.141194	68	494	0.137652	0.139712	0.139701	6.36846	0.00822112	1.90939e-10	0.0253505	1.6163	1.57575	0.692693	0.656042
398	T359G	115	1206	0.0953566	95	1318	0.0720789	0.0832013	0.0823916	-0.738707	0.00562465	0.460085	0.279775	1.09158	0.825115	0.126422	-0.277333
399	T359P	86	917	0.0937841	48	1050	0.0457143	0.068124	0.0639057	-3.01932	0.0063697	0.0025334	0.705622	1.07358	0.523309	0.102433	-0.934265
400	G360H	163	1262	0.12916	121	1597	0.0757671	0.0993354	0.0958811	2.26611	0.00528623	0.0234446	0.537502	1.47854	0.867335	0.564178	-0.205339
401	G360K	119	581	0.204819	57	563	0.101243	0.153846	0.144802	7.95971	0.00835331	1.72448e-15	0.673244	2.34464	1.15897	1.22937	0.212845
402	G360R	110	1100	0.1	209	1480	0.141216	0.123643	0.121893	6.52021	0.00556533	7.02068e-11	0.333347	1.14474	1.61656	0.195018	0.692924
403	G360D	157	1975	0.0794937	69	1557	0.044316	0.0639864	0.0614417	-4.9146	0.00475518	8.89632e-07	0.549768	0.909995	0.507302	-0.13607	-0.979083
404	G360E	29	592	0.0489865	62	964	0.0643154	0.0584833	0.0579868	-4.03221	0.00716057	5.52542e-05	0.262107	0.560767	0.736243	-0.834526	-0.441747
405	G360C	47	851	0.0552291	92	969	0.0949432	0.0763736	0.073696	-1.6585	0.00662203	0.0972172	0.519998	0.632229	1.08685	-0.66148	0.120155
406	G360M	69	901	0.0765816	67	807	0.0830235	0.0796253	0.0795605	-1.13098	0.0068356	0.258062	0.0809035	0.876659	0.950402	-0.189913	-0.0733896
407	G360N	117	982	0.119145	35	758	0.0461741	0.0873563	0.0788379	1.24322e-05	0.00677283	0.99999	0.83532	1.36389	0.528573	0.447732	-0.919825
408	G360Q	27	645	0.0418605	17	517	0.032882	0.0378657	0.0375972	-5.97375	0.00828467	2.31867e-09	0.237113	0.479193	0.376413	-1.06132	-1.40961
409	G360S	130	1374	0.0946143	130	860	0.151163	0.116383	0.113316	4.85437	0.00597955	1.2077e-06	0.485882	1.08309	1.73042	0.115148	0.791121
410	G360T	137	1205	0.113693	139	1246	0.111557	0.112607	0.112602	4.42295	0.00570906	9.73643e-06	0.0189683	1.30149	1.27704	0.380161	0.352799
411	G360A	67	934	0.0717345	58	769	0.0754226	0.0733999	0.073377	-2.0388	0.00684537	0.0414699	0.0502474	0.821172	0.863392	-0.284243	-0.211913
412	G360I	59	1834	0.0321701	54	1601	0.0337289	0.0328967	0.0328875	-11.2987	0.00482	1.33217e-29	0.0473847	0.368264	0.386108	-1.44119	-1.37292
413	G360L	31	453	0.0684327	37	877	0.0421893	0.0511278	0.049745	-4.67799	0.00774444	2.89696e-06	0.51329	0.783375	0.482957	-0.352225	-1.05003
414	G360V	25	379	0.0659631	37	457	0.0809628	0.0741627	0.073781	-1.35072	0.0097678	0.176785	0.202255	0.755105	0.926812	-0.405252	-0.109651
415	G360F	32	908	0.0352423	5	710	0.00704225	0.0228677	0.0173852	-9.18539	0.00702077	4.10042e-20	1.23318	0.403432	0.0806154	-1.3096	-3.6328
416	G360W	9	302	0.0298013	27	484	0.0557851	0.0458015	0.0438431	-4.12544	0.0100728	3.70026e-05	0.567313	0.341147	0.638594	-1.55153	-0.64703
417	G360Y	52	1430	0.0363636	46	1006	0.0457256	0.0402299	0.0399719	-8.23432	0.00572316	1.8058e-16	0.232713	0.416269	0.523439	-1.26441	-0.933907
418	G360G	67379	787475	0.0855634	66181	741437	0.0892604	0.0873562	0.0873367	0	0.00032294	1	0.0423221	0.979477	1.0218	-0.0299171	0.031111
419	G360P	7	409	0.0171149	11	458	0.0240175	0.0207612	0.0204696	-6.94409	0.00959017	3.80911e-12	0.332473	0.195921	0.274937	-2.35166	-1.86283
420	T361H	70	834	0.0839329	93	1007	0.0923535	0.0885388	0.088439	0.179598	0.00658469	0.857468	0.0951071	0.960812	1.05721	-0.0576745	0.0802569
421	T361K	113	1078	0.104824	75	1043	0.071908	0.0886374	0.0870901	0.208826	0.00613525	0.834584	0.371353	1.19996	0.823158	0.262984	-0.280759
422	T361R	116	1065	0.10892	135	1400	0.0964286	0.101826	0.101639	2.54189	0.00569235	0.0110255	0.122677	1.24685	1.10385	0.318289	0.142551
423	T361D	65	810	0.0802469	43	600	0.0716667	0.0765957	0.0764768	-1.43043	0.00752256	0.152594	0.11202	0.918617	0.820396	-0.122464	-0.285608
424	T361E	82	1282	0.0639626	93	1119	0.0831099	0.0728863	0.0722652	-2.50943	0.00576622	0.0120925	0.262702	0.732204	0.951391	-0.449682	-0.0718894
425	T361C	121	1328	0.0911145	82	976	0.0840164	0.0881076	0.0880372	0.12764	0.00588689	0.898434	0.0805613	1.04302	0.961768	0.0607699	-0.0562392
426	T361M	111	1081	0.102683	36	771	0.0466926	0.0793737	0.0739634	-1.21598	0.00656475	0.223994	0.705399	1.17545	0.534508	0.233211	-0.903716
427	T361N	76	558	0.136201	64	794	0.0806045	0.10355	0.100089	2.10777	0.00768304	0.0350513	0.5369	1.55914	0.922711	0.640752	-0.116049
428	T361Q	179	1501	0.119254	111	1316	0.0843465	0.102946	0.10144	2.9274	0.0053256	0.00341808	0.339083	1.36514	0.965547	0.449054	-0.0505818
429	T361S	83	753	0.110226	156	868	0.179724	0.14744	0.143211	8.56006	0.00701906	1.12808e-17	0.471363	1.2618	2.05736	0.335479	1.0408
430	T361T	67379	787475	0.0855634	66181	741437	0.0892604	0.0873562	0.0873367	0	0.00032294	1	0.0423221	0.979477	1.0218	-0.0299171	0.031111
431	T361A	148	1382	0.107091	135	1163	0.116079	0.111198	0.111109	4.25542	0.00560278	2.08659e-05	0.0808279	1.22591	1.3288	0.293858	0.410126
432	T361I	45	393	0.114504	55	402	0.136816	0.125786	0.12529	3.83617	0.0100178	0.000124968	0.177381	1.31077	1.56618	0.390414	0.647254
433	T361L	173	2008	0.0861554	142	2019	0.0703318	0.078222	0.077821	-2.05045	0.00445476	0.040321	0.20229	0.986254	0.805116	-0.0199692	-0.312732
434	T361V	171	2029	0.084278	304	2260	0.134513	0.110748	0.107822	5.41622	0.00431892	6.08737e-08	0.453598	0.964762	1.53983	-0.0517545	0.622767
435	T361F	106	895	0.118436	72	713	0.100982	0.110697	0.110352	3.31259	0.00704592	0.000924353	0.157674	1.35578	1.15598	0.439123	0.209113
436	T361W	100	839	0.11919	111	897	0.123746	0.121544	0.121522	5.04094	0.00678198	4.6325e-07	0.037487	1.36441	1.41657	0.448275	0.502398
437	T361Y	143	1838	0.077802	142	1551	0.0915538	0.0840956	0.0838186	-0.671546	0.00485542	0.501873	0.163527	0.890629	1.04805	-0.167104	0.0677102
438	T361G	154	1399	0.110079	133	1240	0.107258	0.108753	0.108744	3.88883	0.00550219	0.000100728	0.0259354	1.26011	1.22782	0.333552	0.296104
439	T361P	51	227	0.22467	4	279	0.0143369	0.108696	0.0492711	1.6997	0.0125548	0.0891873	1.93506	2.57188	0.16412	1.36282	-2.60718
440	D362H	87	725	0.12	56	559	0.100179	0.111371	0.110929	3.046	0.00788393	0.00231905	0.177974	1.37369	1.14679	0.458052	0.197597
441	D362K	195	1107	0.176152	202	949	0.212856	0.193093	0.192233	16.9563	0.00623587	1.72925e-64	0.190084	2.01648	2.43664	1.01184	1.28489
442	D362R	203	922	0.220174	149	640	0.232813	0.225352	0.225267	19.2917	0.00715311	6.30389e-83	0.0560854	2.52041	2.66509	1.33366	1.41419
443	D362D	67379	787475	0.0855634	66181	741437	0.0892604	0.0873562	0.0873367	0	0.00032294	1	0.0423221	0.979477	1.0218	-0.0299171	0.031111
444	D362E	24	429	0.0559441	31	544	0.0569853	0.0565262	0.0565238	-3.40517	0.00905389	0.000661231	0.0184204	0.640413	0.652333	-0.642925	-0.61632
445	D362C	36	457	0.0787746	58	496	0.116935	0.0986359	0.0967557	1.2328	0.0091496	0.21765	0.386886	0.901763	1.33861	-0.149179	0.420731
446	D362M	158	1513	0.104428	117	1997	0.0585879	0.0783476	0.0751635	-1.88827	0.00477085	0.0589894	0.58509	1.19543	0.670678	0.257531	-0.576308
447	D362N	117	1044	0.112069	108	1268	0.0851735	0.0973183	0.0964099	1.69506	0.00587713	0.0900638	0.276366	1.2829	0.975014	0.359405	-0.0365054
448	D362Q	63	601	0.104825	82	735	0.111565	0.108533	0.108481	2.73989	0.00772904	0.00614604	0.0620948	1.19998	1.27712	0.263005	0.352898
449	D362S	161	771	0.20882	119	798	0.149123	0.178458	0.175954	12.7675	0.00713541	2.48986e-37	0.334516	2.39044	1.70707	1.25728	0.771519
450	D362T	86	1063	0.0809031	91	750	0.121333	0.0976282	0.0956707	1.548	0.00663565	0.121622	0.414124	0.926129	1.38895	-0.110715	0.473994
451	D362A	137	1015	0.134975	50	544	0.0919118	0.119949	0.118038	4.55456	0.007156	5.24951e-06	0.359017	1.54511	1.05215	0.627714	0.0733394
452	D362I	197	1287	0.153069	134	1146	0.116928	0.136046	0.134832	8.49557	0.0057312	1.9697e-17	0.265651	1.75224	1.33852	0.809202	0.420644
453	D362L	48	679	0.0706922	26	482	0.0539419	0.0637382	0.0631849	-2.8493	0.00828907	0.00438152	0.262798	0.809241	0.617494	-0.305359	-0.695504
454	D362V	15	368	0.0407609	35	320	0.109375	0.0726744	0.06451	-1.36362	0.0107668	0.172687	0.94413	0.466605	1.25206	-1.09973	0.324301
455	D362F	110	861	0.127758	213	2026	0.105133	0.111881	0.111426	4.66138	0.00526124	3.14099e-06	0.202225	1.4625	1.2035	0.548436	0.267237
456	D362W	135	1474	0.0915875	116	916	0.126638	0.105021	0.103698	3.05567	0.00578096	0.0022456	0.333743	1.04844	1.44967	0.0682409	0.535723
457	D362Y	75	1208	0.0620861	211	1429	0.147656	0.108457	0.0992862	3.83346	0.00550425	0.000126353	0.788976	0.710723	1.69027	-0.49264	0.757255
458	D362G	123	777	0.158301	18	275	0.0654545	0.13403	0.125668	5.35877	0.00870986	8.37884e-08	0.692728	1.81213	0.749283	0.85769	-0.416417
459	D362P	216	1354	0.159527	143	983	0.145473	0.153616	0.153457	11.3298	0.00584827	9.34487e-30	0.0914899	1.82617	1.66529	0.868822	0.73577
460	V363H	82	1140	0.0719298	97	1127	0.0860692	0.078959	0.0786421	-1.41505	0.00593425	0.157054	0.179073	0.823408	0.985267	-0.28032	-0.0214129
461	V363K	65	406	0.160099	47	501	0.0938124	0.123484	0.11917	3.85186	0.00937931	0.000117225	0.536799	1.83271	1.07391	0.873978	0.102868
462	V363R	120	760	0.157895	44	558	0.078853	0.124431	0.11768	4.76408	0.00778214	1.89717e-06	0.635225	1.80748	0.902661	0.853981	-0.147744
463	V363D	1	373	0.00268097	42	796	0.0527638	0.0367836	0.0203909	-6.12275	0.0082598	9.19752e-10	1.36155	0.03069	0.604008	-5.02609	-0.727361
464	V363E	107	1351	0.0792006	108	1499	0.072048	0.0754386	0.0753543	-2.25144	0.00529334	0.0243576	0.094813	0.90664	0.824762	-0.141399	-0.277951
465	V363C	69	741	0.0931174	113	907	0.124587	0.110437	0.1093	3.31619	0.00695999	0.000912539	0.284951	1.06595	1.42619	0.0921408	0.512166
466	V363M	128	1180	0.108475	119	1550	0.0767742	0.0904762	0.0891454	0.576809	0.00540899	0.564069	0.350373	1.24175	0.878864	0.312375	-0.186289
467	V363N	44	613	0.0717781	99	744	0.133065	0.10538	0.100685	2.35016	0.00766896	0.0187653	0.581578	0.821672	1.52324	-0.283366	0.607144
468	V363Q	26	341	0.0762463	33	454	0.0726872	0.0742138	0.074193	-1.31209	0.0100164	0.18949	0.0479575	0.872821	0.832079	-0.196242	-0.265208
469	V363S	90	1146	0.078534	102	1136	0.0897887	0.0841367	0.0839484	-0.544299	0.00591497	0.586236	0.133767	0.899009	1.02785	-0.153592	0.0396243
470	V363T	134	1179	0.113656	116	1023	0.113392	0.113533	0.113533	4.34643	0.00602263	1.38373e-05	0.00232228	1.30106	1.29804	0.379687	0.376337
471	V363A	73	604	0.120861	1	347	0.00288184	0.0778128	0.0309191	-1.04202	0.0091586	0.297404	1.51619	1.38354	0.0329896	0.468366	-4.92185
472	V363I	150	2088	0.0718391	181	2108	0.0858634	0.0788847	0.0785722	-1.94107	0.00436438	0.0522494	0.177782	0.82237	0.982911	-0.282141	-0.0248672
473	V363L	92	913	0.100767	49	888	0.0551802	0.0782898	0.0748799	-1.36195	0.00665691	0.173212	0.582279	1.15352	0.631669	0.206037	-0.66276
474	V363V	67379	787475	0.0855634	66181	741437	0.0892604	0.0873562	0.0873367	0	0.00032294	1	0.0423221	0.979477	1.0218	-0.0299171	0.031111
475	V363F	36	825	0.0436364	82	795	0.103145	0.0728395	0.0665562	-2.06839	0.00701836	0.038603	0.816978	0.499522	1.18074	-1.00138	0.239687
476	V363W	253	1895	0.133509	210	2025	0.103704	0.118112	0.117175	6.80836	0.00451739	9.87163e-12	0.252349	1.52833	1.18714	0.611958	0.247485
477	V363Y	15	440	0.0340909	31	448	0.0691964	0.0518018	0.0487243	-3.75166	0.009477	0.000175671	0.677689	0.390252	0.792118	-1.35752	-0.336213
478	V363G	37	762	0.0485564	70	487	0.143737	0.0856685	0.0741346	-0.211157	0.00799265	0.832765	1.11103	0.555844	1.64541	-0.847248	0.718451
479	V363P	66	576	0.114583	29	582	0.0498282	0.082038	0.0753983	-0.640722	0.00830039	0.521704	0.789331	1.31168	0.570402	0.391415	-0.809948
480	K364H	43	815	0.0527607	98	916	0.106987	0.0814558	0.0766969	-0.868968	0.00679016	0.384864	0.665713	0.603972	1.22472	-0.727445	0.292452
481	K364K	67379	787475	0.0855634	66181	741437	0.0892604	0.0873562	0.0873367	0	0.00032294	1	0.0423221	0.979477	1.0218	-0.0299171	0.031111
482	K364R	107	871	0.122847	87	619	0.140549	0.130201	0.129913	5.85317	0.00731998	4.82277e-09	0.135958	1.40628	1.60892	0.491884	0.686094
483	K364D	112	1253	0.0893855	53	961	0.0551509	0.0745257	0.0724835	-2.13679	0.00600456	0.032615	0.459366	1.02323	0.631333	0.0331303	-0.663526
484	K364E	99	2087	0.0474365	86	1697	0.0506777	0.0488901	0.0488636	-8.37402	0.00459352	5.56872e-17	0.0662948	0.543024	0.580127	-0.880912	-0.78556
485	K364C	38	883	0.0430351	41	839	0.0488677	0.0458769	0.0457844	-6.09413	0.00680645	1.10037e-09	0.127136	0.492639	0.559407	-1.0214	-0.838029
486	K364M	103	2285	0.0450766	143	2039	0.0701324	0.0568918	0.0555232	-7.08792	0.00429808	1.36142e-12	0.440412	0.516009	0.802833	-0.954532	-0.316829
487	K364N	53	616	0.086039	39	499	0.0781563	0.0825112	0.0824174	-0.572777	0.00845883	0.566796	0.0955343	0.984921	0.894685	-0.02192	-0.160548
488	K364Q	176	2682	0.0656227	157	2157	0.0727863	0.0688159	0.0687244	-4.56188	0.00406419	5.06976e-06	0.104098	0.751208	0.833212	-0.412716	-0.263244
489	K364S	151	1796	0.0840757	116	1397	0.0830351	0.0836204	0.0836188	-0.746882	0.00500188	0.455135	0.0124449	0.962447	0.950534	-0.0552208	-0.0731892
490	K364T	69	1353	0.0509978	86	787	0.109276	0.0724299	0.0674946	-2.44402	0.00610728	0.0145244	0.804612	0.583791	1.25092	-0.776476	0.322991
491	K364A	59	743	0.0794078	77	962	0.0800416	0.0797654	0.0797648	-1.10951	0.00684161	0.26721	0.00794547	0.909012	0.916267	-0.137629	-0.12616
492	K364I	126	1505	0.0837209	55	1443	0.038115	0.0613976	0.0569585	-4.98819	0.00520403	6.09484e-07	0.742797	0.958386	0.436317	-0.0613218	-1.19655
493	K364L	52	1147	0.0453357	115	1166	0.0986278	0.0722006	0.067082	-2.57981	0.00587471	0.00988551	0.738112	0.518975	1.12903	-0.946264	0.175084
494	K364V	56	728	0.0769231	13	627	0.0207337	0.0509225	0.041936	-4.74849	0.00767269	2.04938e-06	1.10343	0.880568	0.237346	-0.183494	-2.07494
495	K364F	68	1140	0.0596491	98	1052	0.0931559	0.0757299	0.073879	-1.9266	0.00603464	0.0540299	0.442451	0.682826	1.06639	-0.550409	0.0927369
496	K364W	30	966	0.0310559	75	888	0.0844595	0.0566343	0.0501483	-4.68302	0.00656028	2.82675e-06	0.942954	0.355509	0.96684	-1.49204	-0.0486511
497	K364Y	33	649	0.0508475	36	651	0.0552995	0.0530769	0.0530302	-4.3761	0.0078333	1.20822e-05	0.0838798	0.58207	0.633035	-0.780734	-0.659643
498	K364G	56	878	0.0637813	65	854	0.0761124	0.0698614	0.0695893	-2.57741	0.00678774	0.00995428	0.176508	0.730129	0.871288	-0.453776	-0.198778
499	K364P	54	552	0.0978261	8	438	0.0182648	0.0626263	0.0465585	-2.75511	0.00897604	0.00586722	1.27041	1.11985	0.209085	0.163309	-2.25784
500	D365H	330	1903	0.17341	237	1695	0.139823	0.157588	0.156686	14.8896	0.0047168	3.85056e-50	0.213135	1.9851	1.60061	0.989208	0.67862
501	D365K	60	407	0.14742	78	473	0.164905	0.156818	0.156574	7.29417	0.00952294	3.00504e-13	0.111497	1.68758	1.88773	0.754952	0.916652
502	D365R	168	773	0.217335	172	800	0.215	0.216147	0.216144	18.0689	0.00712777	5.5985e-73	0.0108031	2.48792	2.46119	1.31494	1.29935
503	D365D	67379	787475	0.0855634	66181	741437	0.0892604	0.0873562	0.0873367	0	0.00032294	1	0.0423221	0.979477	1.0218	-0.0299171	0.031111
504	D365E	87	568	0.153169	71	565	0.125664	0.139453	0.138773	6.20696	0.00839325	5.40206e-10	0.197237	1.75338	1.43852	0.810142	0.524586
505	D365C	135	1212	0.111386	106	791	0.134008	0.12032	0.119823	5.22026	0.00631449	1.78672e-07	0.188011	1.27508	1.53404	0.350588	0.617333
506	D365M	108	805	0.134161	216	1154	0.187175	0.165391	0.163238	12.2181	0.00638679	2.48925e-34	0.320536	1.5358	2.14266	0.618989	1.09941
507	D365N	207	1328	0.155873	180	1107	0.162602	0.158932	0.158897	12.4916	0.00572993	8.29673e-36	0.0423333	1.78434	1.86136	0.835394	0.89636
508	D365Q	63	634	0.0993691	146	920	0.158696	0.134492	0.131104	6.57577	0.00716804	4.84005e-11	0.441117	1.13752	1.81665	0.185887	0.861281
509	D365S	268	1442	0.185853	202	1441	0.14018	0.163025	0.161417	14.3652	0.0052675	8.5616e-47	0.280157	2.12753	1.6047	1.08918	0.682303
510	D365T	43	517	0.0831721	75	522	0.143678	0.113571	0.10946	2.99133	0.0087635	0.00277765	0.532761	0.952104	1.64474	-0.0708096	0.717859
511	D365A	226	1625	0.139077	339	1747	0.194047	0.167556	0.165271	16.4606	0.00487224	7.03636e-61	0.328069	1.59207	2.22133	0.670901	1.15142
512	D365I	157	1519	0.103357	143	1437	0.0995129	0.101488	0.10147	2.71823	0.00519908	0.0065633	0.0378821	1.18317	1.13916	0.242661	0.187973
513	D365L	164	1237	0.132579	110	932	0.118026	0.126325	0.126118	6.42129	0.00606876	1.35123e-10	0.115203	1.51768	1.35109	0.601868	0.43412
514	D365V	186	1348	0.137982	126	971	0.129763	0.134541	0.134479	8.03827	0.00586998	9.11159e-16	0.0610898	1.57954	1.48545	0.6595	0.570899
515	D365F	41	329	0.12462	83	366	0.226776	0.178417	0.17081	8.49837	0.0107151	1.9227e-17	0.572567	1.42657	2.59599	0.512554	1.37629
516	D365W	129	1079	0.119555	191	1282	0.148986	0.135536	0.13473	8.28154	0.0058177	1.21591e-16	0.217144	1.36859	1.7055	0.452694	0.770194
517	D365Y	222	1115	0.199103	156	978	0.159509	0.180602	0.179508	15.088	0.00618011	1.94129e-51	0.219233	2.27921	1.82596	1.18853	0.868658
518	D365G	251	1255	0.2	139	920	0.151087	0.17931	0.177627	15.167	0.00606276	5.84462e-52	0.272784	2.28948	1.72955	1.19502	0.790397
519	D365P	65	818	0.0794621	37	650	0.0569231	0.0694823	0.068551	-2.42447	0.00737232	0.0153309	0.324385	0.909633	0.65162	-0.136643	-0.617896
520	A366H	92	1202	0.0765391	135	1566	0.0862069	0.0820087	0.0818671	-0.995567	0.00537138	0.31946	0.117887	0.876173	0.986843	-0.190713	-0.0191068
521	A366K	44	1088	0.0404412	28	871	0.032147	0.0367534	0.0365177	-7.92979	0.00638135	2.19518e-15	0.225672	0.462946	0.367999	-1.11109	-1.44223
522	A366R	89	815	0.109202	62	1118	0.0554562	0.0781169	0.0737949	-1.43784	0.00642584	0.15048	0.688024	1.25008	0.634828	0.322023	-0.655562
523	A366D	1	626	0.00159744	28	861	0.0325203	0.0195024	0.00914542	-9.26552	0.00732327	1.94131e-20	1.5856	0.0182866	0.372273	-5.77307	-1.42557
524	A366E	45	2559	0.017585	44	1859	0.0236686	0.0201449	0.0199267	-15.8149	0.00424987	2.45477e-56	0.301995	0.201302	0.270944	-2.31257	-1.88393
525	A366C	62	1370	0.0452555	74	1166	0.0634648	0.0536278	0.0528683	-6.01228	0.00560993	1.82928e-09	0.339551	0.518057	0.726506	-0.948818	-0.460953
526	A366M	82	1293	0.0634184	179	1380	0.12971	0.0976431	0.0917597	1.88176	0.00546661	0.0598681	0.678919	0.725975	1.48484	-0.462008	0.570309
527	A366N	115	1268	0.090694	37	590	0.0627119	0.0818084	0.0806675	-0.846449	0.00655426	0.397302	0.342045	1.03821	0.717887	0.0540971	-0.478172
528	A366Q	14	725	0.0193103	61	512	0.119141	0.0606306	0.0410097	-3.32804	0.00803045	0.000874583	1.64653	0.221053	1.36385	-2.17754	0.447683
529	A366S	28	284	0.0985915	26	492	0.0528455	0.0695876	0.0663937	-1.75266	0.0101381	0.079661	0.657387	1.12862	0.604943	0.174554	-0.725129
530	A366T	83	1750	0.0474286	195	2251	0.0866282	0.0694826	0.0665625	-3.99978	0.00446865	6.34009e-05	0.564164	0.542933	0.991666	-0.881154	-0.0120739
531	A366A	67379	787475	0.0855634	66181	741437	0.0892604	0.0873562	0.0873367	0	0.00032294	1	0.0423221	0.979477	1.0218	-0.0299171	0.031111
532	A366I	45	645	0.0697674	71	769	0.0923277	0.0820368	0.0812508	-0.708117	0.00751212	0.478872	0.275002	0.798655	1.05691	-0.324356	0.0798534
533	A366L	49	760	0.0644737	55	695	0.0791367	0.0714777	0.0711037	-2.14424	0.00740523	0.0320139	0.205141	0.738055	0.905908	-0.4382	-0.142563
534	A366V	123	1742	0.0706085	89	1699	0.0523838	0.06161	0.0609308	-5.34442	0.00481741	9.07082e-08	0.295808	0.808283	0.599657	-0.307068	-0.737791
535	A366F	153	1170	0.130769	77	1060	0.0726415	0.103139	0.0988877	2.63736	0.0059843	0.00835531	0.563586	1.49697	0.831555	0.582041	-0.266116
536	A366W	153	1104	0.138587	115	1321	0.0870553	0.110515	0.107578	4.03511	0.00573942	5.45759e-05	0.466285	1.58646	0.996555	0.665809	-0.00497861
537	A366Y	304	2091	0.145385	210	2223	0.0944669	0.119147	0.116422	7.38125	0.00430695	1.56806e-13	0.427355	1.66428	1.0814	0.734896	0.112899
538	A366G	187	2234	0.0837064	175	1777	0.0984806	0.0902518	0.0899566	0.6486	0.00446434	0.516597	0.1637	0.958219	1.12735	-0.0615729	0.172929
539	A366P	28	854	0.0327869	66	951	0.0694006	0.0520776	0.0486723	-5.30629	0.00664847	1.11882e-07	0.703062	0.375324	0.794456	-1.41379	-0.331961
540	K367H	26	344	0.0755814	28	459	0.0610022	0.0672478	0.0668676	-2.01766	0.00996621	0.0436268	0.216798	0.865209	0.698315	-0.208879	-0.518049
541	K367K	67379	787475	0.0855634	66181	741437	0.0892604	0.0873562	0.0873367	0	0.00032294	1	0.0423221	0.979477	1.0218	-0.0299171	0.031111
542	K367R	175	1926	0.0908619	298	2673	0.111485	0.102848	0.102333	3.71442	0.00417083	0.000203672	0.200522	1.04013	1.27621	0.0567652	0.35187
543	K367D	74	1430	0.0517483	56	1391	0.0402588	0.0460829	0.0457227	-7.75968	0.00531894	8.51457e-15	0.249321	0.592382	0.460858	-0.7554	-1.11761
544	K367E	104	1601	0.0649594	33	902	0.0365854	0.0547343	0.052819	-5.77706	0.0056468	7.60164e-09	0.518396	0.743615	0.418807	-0.427372	-1.25564
545	K367C	143	1916	0.0746347	106	2091	0.0506934	0.0621413	0.0609927	-5.64743	0.00446486	1.62867e-08	0.385271	0.854372	0.580307	-0.227064	-0.785111
546	K367M	65	1052	0.0617871	45	708	0.0635593	0.0625	0.062494	-3.69155	0.00673328	0.000222893	0.028356	0.7073	0.727588	-0.499605	-0.458806
547	K367N	92	1292	0.0712074	35	954	0.0366876	0.056545	0.0537271	-5.16892	0.00596087	2.35452e-07	0.610484	0.815139	0.419977	-0.294882	-1.25162
548	K367Q	99	1237	0.0800323	66	863	0.0764774	0.0785714	0.0785519	-1.42486	0.00616537	0.154197	0.0452446	0.916161	0.875466	-0.126327	-0.191877
549	K367S	109	1319	0.0826384	56	948	0.0590717	0.0727834	0.0718143	-2.45583	0.00593397	0.0140559	0.323791	0.945993	0.676217	-0.0800984	-0.564442
550	K367T	45	782	0.0575448	83	757	0.109643	0.0831709	0.0790169	-0.581225	0.00720091	0.561089	0.626404	0.658737	1.25513	-0.602226	0.327836
551	K367A	112	1232	0.0909091	94	1104	0.0851449	0.0881849	0.0881379	0.141742	0.00584649	0.887284	0.0653645	1.04067	0.974687	0.0575145	-0.0369895
552	K367I	78	692	0.112717	49	526	0.0931559	0.104269	0.10381	2.08951	0.00809426	0.0366616	0.1876	1.29031	1.06639	0.36772	0.0927369
553	K367L	42	823	0.0510328	22	872	0.0252294	0.0377581	0.0355186	-7.22995	0.00686009	4.83165e-13	0.683388	0.584192	0.28881	-0.775485	-1.79181
554	K367V	84	1326	0.0633484	58	1372	0.0422741	0.0526316	0.0515712	-6.38434	0.00543904	1.72138e-10	0.400413	0.725174	0.483927	-0.463602	-1.04714
555	K367F	203	2016	0.100694	62	1460	0.0424658	0.0762371	0.0700666	-2.31942	0.00479396	0.0203725	0.763785	1.15269	0.486122	0.205002	-1.04061
556	K367W	26	725	0.0358621	35	592	0.0591216	0.0463174	0.0448981	-5.27331	0.00778238	1.33989e-07	0.502178	0.410527	0.676788	-1.28445	-0.563224
557	K367Y	68	1482	0.0458839	40	1249	0.0320256	0.039546	0.0389261	-8.84482	0.00540546	9.16799e-19	0.350436	0.525251	0.36661	-0.928921	-1.44768
558	K367G	86	1281	0.0671351	73	1111	0.0657066	0.0664716	0.0664678	-3.6153	0.00577674	0.000299999	0.0214901	0.768521	0.752168	-0.379844	-0.410872
559	K367P	18	1165	0.0154506	10	984	0.0101626	0.0130293	0.0127537	-12.201	0.00609186	3.06926e-34	0.405857	0.176869	0.116335	-2.49924	-3.10364
560	V368H	7	1155	0.00606061	2	1401	0.00142755	0.00352113	0.0027437	-15.0093	0.00558554	6.38042e-51	1.31579	0.0693781	0.0163417	-3.84938	-5.9353
561	V368K	6	769	0.00780234	18	831	0.0216606	0.015	0.0132599	-10.249	0.00705984	1.19578e-24	0.923887	0.0893164	0.247958	-3.48493	-2.01183
562	V368R	2	751	0.00266312	0	380	0	0.00176835	0	-10.1936	0.00839624	2.11767e-24	1.50599	0.0304857	0	-5.03572	#NAME?
563	V368D	6	379	0.0158311	0	302	0	0.00881057	0	-7.25906	0.0108204	3.89804e-13	1.79683	0.181225	0	-2.46415	#NAME?
564	V368E	63	1120	0.05625	87	1160	0.075	0.0657895	0.065116	-3.64505	0.00591673	0.00026734	0.285	0.643915	0.858554	-0.635057	-0.22002
565	V368C	35	635	0.0551181	86	784	0.109694	0.0852713	0.0806177	-0.278026	0.007499	0.780992	0.640025	0.630958	1.25571	-0.664384	0.328501
566	V368M	23	1265	0.0181818	36	1280	0.028125	0.0231827	0.0226424	-11.4625	0.00559854	2.03456e-30	0.428905	0.208134	0.321958	-2.26441	-1.63506
567	V368N	15	972	0.0154321	2	964	0.00207469	0.00878099	0.00568185	-12.243	0.00641795	1.83029e-34	1.52117	0.176657	0.0237498	-2.50098	-5.39594
568	V368Q	6	763	0.0078637	13	804	0.0161692	0.0121251	0.0113829	-10.5459	0.00713366	5.3038e-26	0.684982	0.0900188	0.185095	-3.47363	-2.43367
569	V368S	0	540	0	19	471	0.0403397	0.0187933	0	-7.72015	0.00888104	1.16191e-14	2.1465	0	0.461784	#NAME?	-1.11471
570	V368T	27	980	0.027551	38	751	0.0505992	0.0375505	0.0358656	-7.33687	0.00678841	2.18647e-13	0.613791	0.315387	0.579229	-1.6648	-0.787795
571	V368A	14	492	0.0284553	32	587	0.0545145	0.0426321	0.0405291	-5.20203	0.00859744	1.9712e-07	0.611258	0.325739	0.624048	-1.61821	-0.680271
572	V368I	47	638	0.0736677	69	896	0.0770089	0.0756193	0.0756013	-1.62734	0.00721234	0.103665	0.0441847	0.843303	0.881551	-0.245878	-0.181884
573	V368L	37	790	0.0468354	50	511	0.0978474	0.0668716	0.0625536	-2.61591	0.00783077	0.00889897	0.762833	0.536143	1.1201	-0.899309	0.163623
574	V368V	67379	787475	0.0855634	66181	741437	0.0892604	0.0873562	0.0873367	0	0.00032294	1	0.0423221	0.979477	1.0218	-0.0299171	0.031111
575	V368F	2	1302	0.0015361	2	967	0.00206825	0.00176289	0.00174371	-14.4385	0.00592812	2.96091e-47	0.301864	0.0175843	0.0236761	-5.82957	-5.40043
576	V368W	4	1126	0.0035524	8	908	0.00881057	0.00589971	0.00532872	-13.0094	0.00626134	1.08135e-38	0.891261	0.0406657	0.100858	-4.62005	-3.3096
577	V368Y	0	782	0	17	914	0.0185996	0.0100236	0	-11.278	0.00685698	1.68628e-29	1.85558	0	0.212916	#NAME?	-2.23164
578	V368G	6	1338	0.0044843	1	1115	0.000896861	0.00285365	0.00215765	-14.821	0.00570154	1.07172e-49	1.25714	0.0513336	0.0102667	-4.28395	-6.60588
579	V368P	13	1139	0.0114135	2	860	0.00232558	0.00750375	0.00575691	-12.6429	0.00631597	1.22392e-36	1.21112	0.130655	0.0266218	-2.93617	-5.23125
580	I369H	20	2760	0.00724638	22	2659	0.00827379	0.00775051	0.0077335	-20.7478	0.00383684	1.28447e-95	0.13256	0.0829521	0.0947132	-3.59158	-3.40029
581	I369K	0	519	0	16	347	0.0461095	0.0184758	0	-7.17831	0.00959564	7.0578e-13	2.49568	0	0.527833	#NAME?	-0.921846
582	I369R	15	2126	0.0070555	21	1789	0.0117384	0.0091954	0.00890335	-17.3162	0.00451375	3.55323e-67	0.509265	0.0807671	0.134374	-3.63009	-2.89567
583	I369D	2	571	0.00350263	1	720	0.00138889	0.00232378	0.00209097	-10.82	0.0078588	2.76699e-27	0.909612	0.0400959	0.0158991	-4.6404	-5.97491
584	I369E	0	511	0	0	302	0	0	0	-8.82126	0.00990292	1.13181e-18		0	0	#NAME?	#NAME?
585	I369C	90	2164	0.0415896	107	2212	0.0483725	0.0450183	0.0448902	-9.91111	0.00427177	3.72498e-23	0.150669	0.476093	0.553739	-1.07069	-0.852723
586	I369M	3	1239	0.00242131	2	1244	0.00160772	0.00201369	0.0019722	-15.0597	0.00566696	2.98298e-51	0.404029	0.0277176	0.0184042	-5.17305	-5.76382
587	I369N	22	1700	0.0129412	34	1379	0.0246555	0.0181877	0.0172724	-13.5891	0.00508999	4.64583e-42	0.644081	0.148143	0.282242	-2.75494	-1.825
588	I369Q	1	1146	0.0008726	2	843	0.00237248	0.0015083	0.00133328	-13.5587	0.00633157	7.0366e-42	0.99442	0.00998899	0.0271587	-6.64545	-5.20244
589	I369S	9	1099	0.00818926	5	1127	0.00443656	0.00628931	0.00600442	-13.5443	0.0059853	8.55778e-42	0.59668	0.0937456	0.050787	-3.4151	-4.2994
590	I369T	3	770	0.0038961	3	667	0.00449775	0.00417537	0.00416464	-11.1667	0.00744899	5.93267e-29	0.144095	0.0446002	0.0514875	-4.48681	-4.27963
591	I369A	18	2054	0.00876339	11	1681	0.00654372	0.00776439	0.00768391	-17.2236	0.0046211	1.76764e-66	0.285877	0.100318	0.0749085	-3.31735	-3.73873
592	I369I	67379	787475	0.0855634	66181	741437	0.0892604	0.0873562	0.0873367	0	0.00032294	1	0.0423221	0.979477	1.0218	-0.0299171	0.031111
593	I369L	19	591	0.0321489	6	575	0.0104348	0.0214408	0.0184577	-7.97051	0.00826991	1.58022e-15	1.01275	0.368021	0.119451	-1.44214	-3.06551
594	I369V	53	644	0.0822981	68	754	0.0901857	0.0865522	0.0864624	-0.106421	0.00755511	0.915249	0.0911304	0.942098	1.03239	-0.0860503	0.0459882
595	I369F	22	863	0.0254925	11	917	0.0119956	0.0185393	0.0172883	-10.281	0.00669361	8.58423e-25	0.728011	0.291822	0.137319	-1.77684	-2.8644
596	I369W	5	759	0.00658762	1	534	0.00187266	0.00464037	0.00391853	-10.5333	0.0078528	6.06751e-26	1.01607	0.075411	0.021437	-3.72908	-5.54375
597	I369Y	1	756	0.00132275	0	687	0	0.000693001	0	-11.6587	0.00743337	2.07229e-31	1.90873	0.015142	0	-6.0453	#NAME?
598	I369G	4	770	0.00519481	1	903	0.00110742	0.00298864	0.00225558	-12.2207	0.00690366	2.41011e-34	1.36764	0.0594669	0.0126771	-4.07177	-6.30164
599	I369P	21	704	0.0298295	1	681	0.00146843	0.0158845	0.00678592	-9.41913	0.00758794	4.54858e-21	1.78546	0.34147	0.0168097	-1.55017	-5.89456
600	S370H	4	638	0.00626959	4	907	0.00441014	0.00517799	0.00509971	-11.4391	0.007184	2.66727e-30	0.359106	0.0717704	0.0504846	-3.80047	-4.30801
601	S370K	7	688	0.0101744	15	750	0.02	0.015299	0.0144743	-9.67626	0.00744681	3.80387e-22	0.642236	0.11647	0.228948	-3.10196	-2.12691
602	S370R	0	830	0	5	493	0.010142	0.00377929	0	-10.7657	0.00776324	4.99637e-27	2.68357	0	0.116099	#NAME?	-3.10657
603	S370D	3	1144	0.00262238	18	1223	0.0147179	0.00887199	0.006394	-13.5214	0.00580446	1.16961e-41	1.36334	0.0300194	0.168482	-5.05796	-2.56934
604	S370E	17	836	0.0203349	5	893	0.0055991	0.0127241	0.0104459	-10.9893	0.00679135	4.30272e-28	1.1581	0.232782	0.0640951	-2.10295	-3.96364
605	S370C	62	716	0.0865922	42	630	0.0666667	0.077266	0.0766164	-1.31056	0.00769921	0.190007	0.257882	0.991254	0.763159	-0.0126734	-0.389945
606	S370M	21	980	0.0214286	1	1126	0.000888099	0.0104463	0.00390665	-12.4984	0.0061536	7.6212e-36	1.96628	0.245301	0.0101664	-2.02737	-6.62005
607	S370N	119	1003	0.118644	69	1118	0.0617174	0.0886374	0.0840682	0.208826	0.00613525	0.834584	0.642242	1.35816	0.706502	0.441658	-0.501234
608	S370Q	0	534	0	5	648	0.00771605	0.00423012	0	-10.121	0.0082132	4.45645e-24	1.82407	0	0.0883286	#NAME?	-3.50098
609	S370S	67379	787475	0.0855634	66181	741437	0.0892604	0.0873562	0.0873367	0	0.00032294	1	0.0423221	0.979477	1.0218	-0.0299171	0.031111
610	S370T	65	676	0.0961538	53	715	0.0741259	0.0848311	0.0841171	-0.3334	0.00757402	0.738832	0.259669	1.10071	0.848547	0.138434	-0.236933
611	S370A	30	743	0.0403769	44	529	0.0831758	0.0581761	0.0545334	-3.68474	0.00791918	0.000228933	0.735679	0.462209	0.952145	-1.11338	-0.0707462
612	S370I	34	1359	0.0250184	37	1199	0.030859	0.0277561	0.0276039	-10.6724	0.00558453	1.37075e-26	0.210428	0.286395	0.353255	-1.80392	-1.50122
613	S370L	4	1534	0.00260756	17	1079	0.0157553	0.00803674	0.00548046	-14.3577	0.00552452	9.53005e-47	1.63596	0.0298498	0.180357	-5.06614	-2.47107
614	S370V	88	1510	0.0582781	107	1291	0.0828815	0.069618	0.0685492	-3.32235	0.00533907	0.000892635	0.353405	0.667132	0.948776	-0.583955	-0.0758602
615	S370F	3	629	0.00476948	9	722	0.0124654	0.00888231	0.00796982	-10.2146	0.00768256	1.7066e-24	0.86643	0.054598	0.142696	-4.19501	-2.80898
616	S370W	7	1662	0.00421179	6	1353	0.00443459	0.00431177	0.00431036	-16.1472	0.00514297	1.18871e-58	0.0516717	0.048214	0.0507645	-4.3744	-4.30004
617	S370Y	1	1022	0.000978474	2	796	0.00251256	0.00165017	0.00147869	-12.9414	0.00662262	2.62738e-38	0.929658	0.011201	0.0287623	-6.48023	-5.11968
618	S370G	165	1173	0.140665	86	828	0.103865	0.125437	0.124074	6.02752	0.00631786	1.66491e-09	0.293376	1.61025	1.18898	0.687281	0.249724
619	S370P	29	2505	0.0115768	15	1568	0.00956633	0.0108028	0.0107571	-17.2983	0.00442548	4.84245e-67	0.18611	0.132525	0.109509	-2.91567	-3.19087
620	V371H	1	674	0.00148368	1	634	0.00157729	0.00152905	0.00152834	-10.9929	0.00780754	4.13639e-28	0.0612193	0.0169842	0.0180558	-5.87966	-5.79139
621	V371K	3	663	0.00452489	0	443	0	0.00271248	0	-9.96909	0.00849062	2.08129e-23	1.66817	0.0517981	0	-4.27096	#NAME?
622	V371R	5	1113	0.00449236	2	492	0.00406504	0.00436137	0.0043568	-11.7749	0.00704843	5.25485e-32	0.0979789	0.0514258	0.0465341	-4.28136	-4.42557
623	V371D	5	607	0.00823723	1	690	0.00144928	0.00462606	0.00326829	-10.5514	0.00784069	5.00482e-26	1.46733	0.0942948	0.0165904	-3.40668	-5.91351
624	V371E	50	1155	0.04329	52	1202	0.0432612	0.0432754	0.0432753	-7.57619	0.00581835	3.55863e-14	0.000665783	0.495558	0.495228	-1.01287	-1.01384
625	V371C	73	963	0.0758048	60	779	0.0770218	0.076349	0.0763466	-1.62624	0.0067685	0.103899	0.0159406	0.867766	0.881698	-0.204621	-0.181643
626	V371M	119	1497	0.0794923	147	1695	0.0867257	0.0833333	0.0832548	-0.804155	0.00500265	0.421308	0.0868001	0.909979	0.992782	-0.136095	-0.0104511
627	V371N	0	325	0	3	276	0.0108696	0.00499168	0	-7.15101	0.0115179	8.61414e-13	2.17754	0	0.124428	#NAME?	-3.00662
628	V371Q	6	807	0.00743494	7	543	0.0128913	0.00962963	0.0092772	-10.1135	0.00768543	4.81326e-24	0.566626	0.0851107	0.147572	-3.55452	-2.76051
629	V371S	0	645	0	1	574	0.00174216	0.000820345	0	-10.7	0.00808749	1.01813e-26	2.12369	0	0.0199432	#NAME?	-5.64796
630	V371T	3	279	0.0107527	0	281	0	0.00535714	0	-6.87216	0.0119321	6.32357e-12	2.00717	0.12309	0	-3.02221	#NAME?
631	V371A	5	513	0.00974659	27	688	0.0392442	0.0266445	0.0216464	-7.45047	0.00814872	9.30107e-14	1.10708	0.111573	0.449243	-3.16394	-1.15443
632	V371I	74	924	0.0800866	77	940	0.0819149	0.0810086	0.0810034	-0.970044	0.00654368	0.332025	0.0225694	0.916782	0.937711	-0.12535	-0.0927843
633	V371L	133	1049	0.126787	125	899	0.139043	0.132444	0.132303	7.04118	0.00640337	1.90614e-12	0.0925373	1.45138	1.59168	0.53743	0.670553
634	V371V	67379	787475	0.0855634	66181	741437	0.0892604	0.0873562	0.0873367	0	0.00032294	1	0.0423221	0.979477	1.0218	-0.0299171	0.031111
635	V371F	51	711	0.07173	39	600	0.065	0.0686499	0.0685675	-2.39796	0.00780093	0.0164865	0.0980331	0.82112	0.74408	-0.284334	-0.42647
636	V371W	16	624	0.025641	0	504	0	0.0141844	0	-8.70286	0.00840779	3.23619e-18	1.80769	0.293523	0	-1.76846	#NAME?
637	V371Y	1	1036	0.000965251	1	1012	0.000988142	0.000976562	0.000976495	-13.8436	0.0062397	1.39116e-43	0.0234407	0.0110496	0.0113116	-6.49986	-6.46605
638	V371G	4	1053	0.00379867	14	1008	0.0138889	0.00873362	0.00716148	-12.6396	0.00622032	1.2765e-36	1.15533	0.0434848	0.158991	-4.52334	-2.65298
639	V371P	10	582	0.0171821	4	314	0.0127389	0.015625	0.0154717	-7.60382	0.00943358	2.8751e-14	0.28437	0.19669	0.145827	-2.346	-2.77767
640	S372H	23	418	0.0550239	0	434	0	0.0269953	0	-6.23926	0.00967438	4.3966e-10	2.03828	0.62988	0	-0.666851	#NAME?
641	S372K	0	538	0	0	289	0	0	0	-8.89688	0.00981875	5.74375e-19		0	0	#NAME?	#NAME?
642	S372R	1	813	0.00123001	6	649	0.00924499	0.00478796	0.00301145	-11.1804	0.00738506	5.08336e-29	1.67399	0.0140804	0.105831	-6.15017	-3.24017
643	S372D	0	717	0	7	726	0.00964187	0.004851	0	-11.0991	0.00743352	1.26735e-28	1.9876	0	0.110374	#NAME?	-3.17952
644	S372E	0	813	0	0	542	0	0	0	-11.388	0.0076709	4.79863e-30		0	0	#NAME?	#NAME?
645	S372C	130	1538	0.0845254	117	1291	0.0906274	0.08731	0.0872573	-0.00870122	0.00531352	0.993058	0.0698896	0.967594	1.03745	-0.0475259	0.0530375
646	S372M	0	590	0	3	604	0.00496689	0.00251256	0	-10.3825	0.00817177	2.97762e-25	1.97682	0	0.0568579	#NAME?	-4.1365
647	S372N	29	1235	0.0234818	90	1014	0.0887574	0.0529124	0.0427656	-5.78233	0.00595674	7.36713e-09	1.23365	0.268805	1.01604	-1.89537	0.0229572
648	S372Q	15	854	0.0175644	22	598	0.0367893	0.0254821	0.0238162	-8.34874	0.0074112	6.89967e-17	0.754447	0.201066	0.421141	-2.31426	-1.24762
649	S372S	67379	787475	0.0855634	66181	741437	0.0892604	0.0873562	0.0873367	0	0.00032294	1	0.0423221	0.979477	1.0218	-0.0299171	0.031111
650	S372T	93	870	0.106897	39	718	0.0543175	0.0831234	0.0787089	-0.597092	0.00708905	0.550446	0.632541	1.22369	0.621794	0.291233	-0.685492
651	S372A	136	1140	0.119298	82	896	0.0915179	0.107073	0.106162	3.14827	0.00626263	0.00164239	0.259454	1.36565	1.04764	0.449591	0.0671432
652	S372I	0	519	0	1	713	0.00140252	0.000811688	0	-10.7579	0.00804471	5.43699e-27	1.72791	0	0.0160552	#NAME?	-5.96081
653	S372L	2	1194	0.00167504	1	1163	0.000859845	0.0012728	0.00120539	-14.8001	0.0058164	1.46212e-49	0.640473	0.0191748	0.00984298	-5.70464	-6.66669
654	S372V	10	1038	0.00963391	1	1235	0.000809717	0.00483942	0.00250878	-13.9315	0.00592304	4.07761e-44	1.8234	0.110283	0.00926914	-3.18072	-6.75335
655	S372F	22	1525	0.0144262	6	1510	0.00397351	0.0092257	0.00759534	-15.2412	0.00512626	1.88273e-52	1.133	0.165143	0.0454863	-2.59822	-4.45842
656	S372W	0	1035	0	7	1307	0.00535578	0.0029889	0	-14.4587	0.00583507	2.21052e-47	1.79189	0	0.0613096	#NAME?	-4.02774
657	S372Y	30	1587	0.0189036	13	1868	0.00695931	0.0124457	0.011013	-15.5905	0.00480489	8.45159e-55	0.959709	0.216397	0.079666	-2.20825	-3.64989
658	S372G	35	537	0.0651769	36	608	0.0592105	0.0620087	0.0619375	-3.03683	0.0083467	0.00239081	0.0962184	0.746105	0.677806	-0.422549	-0.561056
659	S372P	14	1220	0.0114754	16	931	0.0171858	0.013947	0.0136674	-12.0559	0.00608907	1.80527e-33	0.409437	0.131363	0.196733	-2.92836	-2.34569
660	T373H	1	397	0.00251889	0	627	0	0.000976562	0	-9.78923	0.00882395	1.25245e-22	2.57935	0.0288347	0	-5.11605	#NAME?
661	T373K	2	621	0.00322061	0	492	0	0.00179695	0	-10.1088	0.00846385	5.0505e-24	1.79227	0.0368676	0	-4.7615	#NAME?
662	T373R	0	1013	0	16	940	0.0170213	0.00819252	0	-12.3888	0.00638994	3.00465e-35	2.07766	0	0.194849	#NAME?	-2.35957
663	T373D	1	1702	0.000587544	16	1671	0.0095751	0.00504002	0.00234165	-16.9288	0.00486251	2.76126e-64	1.78324	0.00672584	0.10961	-7.21607	-3.18955
664	T373E	6	747	0.00803213	0	758	0	0.00398671	0	-11.4538	0.00727878	2.25119e-30	2.01473	0.0919469	0	-3.44306	#NAME?
665	T373C	24	954	0.0251572	29	1286	0.0225505	0.0236607	0.023626	-10.674	0.00596736	1.34707e-26	0.110169	0.287985	0.258145	-1.79594	-1.95375
666	T373M	7	1484	0.00471698	6	1544	0.00388601	0.00429326	0.00427317	-16.1856	0.00513192	6.37715e-59	0.193552	0.0539971	0.0444847	-4.21097	-4.49055
667	T373N	21	1274	0.0164835	9	1631	0.00551809	0.010327	0.00891695	-14.701	0.00523972	6.34978e-49	1.06182	0.188693	0.0631677	-2.40589	-3.98467
668	T373Q	5	834	0.0059952	1	732	0.00136612	0.00383142	0.00300307	-11.7053	0.00713562	1.1969e-31	1.20819	0.0686294	0.0156385	-3.86503	-5.99875
669	T373S	83	1600	0.051875	167	1255	0.133068	0.0875657	0.0784868	0.0395961	0.00528933	0.968415	0.927221	0.593833	1.52328	-0.751871	0.607179
670	T373T	67379	787475	0.0855634	66181	741437	0.0892604	0.0873562	0.0873367	0	0.00032294	1	0.0423221	0.979477	1.0218	-0.0299171	0.031111
671	T373A	17	1269	0.0133964	15	798	0.018797	0.0154814	0.0152679	-11.5711	0.00621159	5.77392e-31	0.348846	0.153353	0.215176	-2.70507	-2.21641
672	T373I	6	1205	0.00497925	8	1074	0.00744879	0.00614305	0.00602002	-13.7293	0.0059153	6.7749e-43	0.402005	0.0569994	0.0852692	-4.13291	-3.55183
673	T373L	12	881	0.0136209	6	1163	0.00515907	0.00880626	0.00783977	-12.5758	0.00624614	2.86981e-36	0.960886	0.155924	0.0590579	-2.68109	-4.08173
674	T373V	0	264	0	2	411	0.00486618	0.00296296	0	-7.76515	0.0108682	8.15468e-15	1.64234	0	0.055705	#NAME?	-4.16605
675	T373F	0	1303	0	4	979	0.0040858	0.00175285	0	-14.4815	0.00591121	1.58539e-47	2.33095	0	0.0467717	#NAME?	-4.41822
676	T373W	2	1270	0.0015748	4	1108	0.00361011	0.00252313	0.00231793	-14.6498	0.00579072	1.35052e-48	0.806659	0.0180274	0.0413263	-5.79367	-4.5968
677	T373Y	0	740	0	2	792	0.00252525	0.00130548	0	-11.9279	0.00721426	8.47185e-33	1.93434	0	0.0289075	#NAME?	-5.11241
678	T373G	8	1394	0.00573888	2	1500	0.00133333	0.00345543	0.00269323	-15.9832	0.00524931	1.67319e-57	1.27497	0.0656952	0.0152632	-3.92807	-6.0338
679	T373P	8	1898	0.00421496	11	1947	0.00564972	0.00494148	0.00488901	-18.0957	0.00455438	3.44518e-73	0.290349	0.0482503	0.0646745	-4.37332	-3.95066
680	G374H	4	631	0.00633914	4	879	0.00455063	0.00529801	0.00522672	-11.2923	0.00726677	1.4331e-29	0.337583	0.0725666	0.0520928	-3.78455	-4.26277
681	G374K	0	491	0	2	495	0.0040404	0.0020284	0	-9.48889	0.0089924	2.33514e-21	1.99192	0	0.0462521	#NAME?	-4.43434
682	G374R	1	792	0.00126263	7	935	0.00748663	0.00463231	0.00330967	-12.1743	0.00679496	4.25961e-34	1.34361	0.0144538	0.0857023	-6.11241	-3.54452
683	G374D	35	1681	0.0208209	21	1465	0.0143345	0.0178004	0.0174987	-13.8131	0.00503551	2.12554e-43	0.364401	0.238345	0.164092	-2.06887	-2.60742
684	G374E	4	1287	0.003108	10	639	0.0156495	0.00726895	0.00531366	-12.4465	0.00643452	1.46106e-35	1.72535	0.0355785	0.179145	-4.81285	-2.4808
685	G374C	5	1272	0.00393082	8	906	0.00883002	0.00596878	0.00550415	-13.4506	0.00605086	3.05578e-41	0.820805	0.0449976	0.101081	-4.47401	-3.30642
686	G374M	1	714	0.00140056	0	615	0	0.000752445	0	-11.181	0.00774559	5.04937e-29	1.86134	0.0160328	0	-5.96283	#NAME?
687	G374N	11	481	0.022869	0	449	0	0.011828	0	-8.15689	0.00925944	3.43758e-16	1.93347	0.26179	0	-1.93352	#NAME?
688	G374Q	1	261	0.00383142	1	320	0.003125	0.00344234	0.00342461	-7.16331	0.0117144	7.87542e-13	0.205214	0.0438597	0.0357731	-4.51096	-4.80498
689	G374S	13	1845	0.00704607	17	1808	0.00940265	0.00821243	0.00812763	-16.9375	0.00467268	2.37834e-64	0.286953	0.0806591	0.107636	-3.63202	-3.21577
690	G374T	0	514	0	1	460	0.00217391	0.00102669	0	-9.54172	0.00904759	1.40484e-21	2.11739	0	0.0248856	#NAME?	-5.32854
691	G374A	5	639	0.00782473	4	861	0.00464576	0.006	0.00580108	-11.1585	0.00729097	6.50905e-29	0.529828	0.0895726	0.0531818	-3.4808	-4.23292
692	G374I	0	580	0	6	681	0.00881057	0.00475813	0	-10.3873	0.00795181	2.83157e-25	1.85169	0	0.100858	#NAME?	-3.3096
693	G374L	1	588	0.00170068	2	576	0.00347222	0.00257732	0.00242113	-10.2435	0.0082764	1.2663e-24	0.687358	0.0194683	0.0397479	-5.68273	-4.65298
694	G374V	0	752	0	15	954	0.0157233	0.0087925	0	-11.4913	0.00683681	1.45914e-30	1.78826	0	0.17999	#NAME?	-2.47401
695	G374F	21	752	0.0279255	0	744	0	0.0140374	0	-10.0423	0.00730101	9.93496e-24	1.98936	0.319674	0	-1.64533	#NAME?
696	G374W	8	1138	0.00702988	14	1314	0.0106545	0.00897227	0.00878458	-13.7444	0.005703	5.50641e-43	0.40398	0.0804737	0.121966	-3.63534	-3.03545
697	G374Y	1	356	0.00280899	3	623	0.00481541	0.0040858	0.00395833	-9.2271	0.00902455	2.78049e-20	0.491071	0.0321556	0.0551238	-4.95879	-4.18118
698	G374G	67379	787475	0.0855634	66181	741437	0.0892604	0.0873562	0.0873367	0	0.00032294	1	0.0423221	0.979477	1.0218	-0.0299171	0.031111
699	G374P	5	597	0.00837521	28	727	0.0385144	0.0249245	0.0193571	-8.04425	0.00776104	8.67758e-16	1.20922	0.0958742	0.44089	-3.38271	-1.18151
700	T375H	1	816	0.00122549	2	675	0.00296296	0.00201207	0.00182763	-11.6705	0.0073128	1.80307e-31	0.863524	0.0140287	0.0339182	-6.15548	-4.8818
701	T375K	7	807	0.0086741	0	752	0	0.00449006	0	-11.587	0.00715165	4.79594e-31	1.93185	0.0992958	0	-3.33212	#NAME?
702	T375R	6	850	0.00705882	3	785	0.00382166	0.00550459	0.00525762	-11.7207	0.00698352	9.98522e-32	0.588085	0.0808051	0.043748	-3.62941	-4.51464
703	T375D	0	633	0	2	687	0.00291121	0.00151515	0	-11.0449	0.00777198	2.31901e-28	1.9214	0	0.0333257	#NAME?	-4.90722
704	T375E	38	711	0.0534459	0	847	0	0.0243902	0	-8.80066	0.00715469	1.36016e-18	2.19128	0.611815	0	-0.708832	#NAME?
705	T375C	16	813	0.0196802	19	750	0.0253333	0.0223928	0.0222152	-9.09448	0.00714317	9.50384e-20	0.252453	0.225287	0.29	-2.15017	-1.78587
706	T375M	15	1459	0.010281	5	1159	0.00431406	0.00763942	0.00699955	-14.4435	0.00551922	2.75517e-47	0.781074	0.117691	0.0493847	-3.08693	-4.33979
707	T375N	104	1072	0.0970149	51	813	0.0627306	0.0822281	0.0803837	-0.788067	0.00650722	0.430658	0.416941	1.11057	0.718102	0.151297	-0.47774
708	T375Q	24	700	0.0342857	16	518	0.030888	0.0328407	0.0327973	-6.73707	0.00809188	1.61617e-11	0.103459	0.392482	0.353587	-1.3493	-1.49986
709	T375S	109	1031	0.105723	59	1036	0.0569498	0.0812772	0.0775363	-0.978209	0.00621444	0.327971	0.60008	1.21025	0.651926	0.275302	-0.617219
710	T375T	67379	787475	0.0855634	66181	741437	0.0892604	0.0873562	0.0873367	0	0.00032294	1	0.0423221	0.979477	1.0218	-0.0299171	0.031111
711	T375A	35	1556	0.0224936	37	956	0.0387029	0.0286624	0.0276537	-10.4151	0.00563544	2.11512e-25	0.565526	0.257493	0.443047	-1.9574	-1.17447
712	T375I	15	750	0.02	2	584	0.00342466	0.0127436	0.00923653	-9.65049	0.00773148	4.89208e-22	1.30068	0.228948	0.0392034	-2.12691	-4.67288
713	T375L	0	824	0	0	649	0	0	0	-11.8735	0.00735726	1.6258e-32		0	0	#NAME?	#NAME?
714	T375V	4	470	0.00851064	16	704	0.0227273	0.0170358	0.015338	-8.53243	0.00824155	1.43303e-17	0.834516	0.0974245	0.260168	-3.35957	-1.94249
715	T375F	8	1225	0.00653061	0	1282	0	0.00319107	0	-14.9233	0.00563983	2.32327e-50	2.04653	0.0747584	0	-3.74162	#NAME?
716	T375W	7	1710	0.00409357	15	1818	0.00825083	0.00623583	0.00587434	-17.0615	0.00475459	2.87201e-65	0.666673	0.0468606	0.0944504	-4.41548	-3.4043
717	T375Y	5	1391	0.00359454	0	1337	0	0.00183284	0	-15.8185	0.00540654	2.31976e-56	1.96118	0.041148	0	-4.60303	#NAME?
718	T375G	62	1133	0.054722	72	1302	0.0552995	0.0550308	0.05503	-5.64633	0.00572503	1.63909e-08	0.0104953	0.626424	0.633035	-0.67479	-0.659643
719	T375P	24	1739	0.013801	24	1362	0.0176211	0.0154789	0.0153646	-14.1721	0.00507177	1.36453e-45	0.246795	0.157986	0.201716	-2.66213	-2.3096
720	K376H	9	1040	0.00865385	16	633	0.0252765	0.0149432	0.0129819	-10.4884	0.00690413	9.77102e-26	1.11239	0.0990639	0.289349	-3.3355	-1.78912
721	K376K	67379	787475	0.0855634	66181	741437	0.0892604	0.0873562	0.0873367	0	0.00032294	1	0.0423221	0.979477	1.0218	-0.0299171	0.031111
722	K376R	53	1612	0.0328784	59	1227	0.0480848	0.0394505	0.0387494	-9.03586	0.00530174	1.62721e-19	0.385454	0.376372	0.550445	-1.40977	-0.86133
723	K376D	9	989	0.0091001	8	854	0.00936768	0.00922409	0.00922313	-11.878	0.00657787	1.53934e-32	0.0290089	0.104172	0.107235	-3.26296	-3.22115
724	K376E	26	1079	0.0240964	16	980	0.0163265	0.0203983	0.0200211	-10.7583	0.00622385	5.41659e-27	0.380908	0.275841	0.186896	-1.85809	-2.41969
725	K376C	11	1256	0.00875796	23	1152	0.0199653	0.0141196	0.0129901	-12.7255	0.00575509	4.26494e-37	0.793742	0.100256	0.22855	-3.31824	-2.12942
726	K376M	17	1454	0.0116919	61	1113	0.0548068	0.0303857	0.0228452	-10.2192	0.00557486	1.62697e-24	1.41892	0.133841	0.627395	-2.9014	-0.672554
727	K376N	17	1208	0.0140728	48	1312	0.0365854	0.0257937	0.0231423	-10.9418	0.00562635	7.2721e-28	0.872793	0.161097	0.418807	-2.634	-1.25564
728	K376Q	66	2106	0.031339	115	1853	0.0620615	0.0457186	0.0431492	-9.27174	0.00449081	1.83128e-20	0.671991	0.35875	0.710442	-1.47895	-0.493211
729	K376S	28	1280	0.021875	1	786	0.00127226	0.0140368	0.00741237	-11.8009	0.00621303	3.86041e-32	1.46777	0.250412	0.0145641	-1.99763	-6.10144
730	K376T	59	1544	0.0382124	37	1287	0.028749	0.0339103	0.0335756	-10.0672	0.00530893	7.71616e-24	0.279072	0.437432	0.329101	-1.19287	-1.6034
731	K376A	1	1589	0.000629327	41	1409	0.0290987	0.0140093	0.00381409	-14.2199	0.00515803	6.89194e-46	2.03217	0.00720414	0.333103	-7.11696	-1.58596
732	K376I	19	934	0.0203426	1	843	0.00118624	0.0112549	0.00528314	-11.3602	0.00669896	6.60181e-30	1.70204	0.23287	0.0135793	-2.10241	-6.20244
733	K376L	33	2090	0.0157895	14	2243	0.00624164	0.010847	0.00976601	-17.8313	0.00429073	4.03968e-71	0.880229	0.180748	0.0714505	-2.46795	-3.80691
734	K376V	18	1804	0.00997783	11	2128	0.00516917	0.00737538	0.00698974	-17.7582	0.00450388	1.48902e-70	0.651987	0.11422	0.0591735	-3.13011	-4.0789
735	K376F	3	1426	0.00210379	5	1645	0.00303951	0.00260501	0.00256213	-16.6316	0.00509579	4.11243e-62	0.359202	0.0240829	0.0347945	-5.37585	-4.845
736	K376W	8	1491	0.00536553	1	1974	0.000506586	0.0025974	0.00139861	-17.6676	0.0047974	7.44349e-70	1.87069	0.0614212	0.00579908	-4.02512	-7.42996
737	K376Y	1	1278	0.000782473	17	1056	0.0160985	0.00771208	0.00307375	-13.6254	0.00584528	2.82938e-42	1.98598	0.00895726	0.184286	-6.80273	-2.43999
738	K376G	20	912	0.0219298	17	801	0.0212235	0.0215995	0.0215967	-9.63704	0.00682333	5.57754e-22	0.0327023	0.251039	0.242953	-1.99402	-2.04125
739	K376P	1	1248	0.000801282	6	1216	0.00493421	0.00284091	0.00196506	-14.8564	0.0056888	6.32036e-50	1.45479	0.00917258	0.0564838	-6.76846	-4.14602
740	C377H	52	479	0.108559	24	334	0.0718563	0.0934809	0.0916319	0.618315	0.00990547	0.536368	0.392628	1.24272	0.822567	0.313504	-0.281796
741	C377K	13	393	0.0330789	1	307	0.00325733	0.02	0.0119687	-6.31101	0.0106728	2.77213e-10	1.49108	0.378667	0.0372879	-1.401	-4.74515
742	C377R	28	867	0.0322953	6	599	0.0100167	0.0231924	0.0200172	-8.69942	0.00737565	3.33597e-18	0.9606	0.369696	0.114665	-1.43559	-3.1245
743	C377D	0	432	0	1	505	0.0019802	0.00106724	0	-9.35435	0.00922448	8.41184e-21	1.85545	0	0.0226681	#NAME?	-5.46319
744	C377E	25	792	0.0315657	4	1221	0.003276	0.0144064	0.00798805	-11.5899	0.00629427	4.63789e-31	1.96369	0.361344	0.0375017	-1.46855	-4.7369
745	C377C	67379	787475	0.0855634	66181	741437	0.0892604	0.0873562	0.0873367	0	0.00032294	1	0.0423221	0.979477	1.0218	-0.0299171	0.031111
746	C377M	52	1006	0.0516899	44	785	0.056051	0.0536013	0.0535579	-5.05733	0.00667445	4.2516e-07	0.0813617	0.591714	0.641637	-0.757029	-0.640171
747	C377N	43	1067	0.0402999	81	1302	0.062212	0.0523428	0.0511613	-6.03262	0.00580403	1.61325e-09	0.418627	0.461329	0.712164	-1.11613	-0.489718
748	C377Q	34	815	0.0417178	39	552	0.0706522	0.0534016	0.0516076	-4.44488	0.00763905	8.79421e-06	0.541826	0.47756	0.808783	-1.06625	-0.306176
749	C377S	101	1884	0.0536093	98	1893	0.0517697	0.0526873	0.0526793	-7.54002	0.00459799	4.69895e-14	0.0349166	0.613687	0.592627	-0.704426	-0.754803
750	C377T	64	609	0.10509	7	454	0.0154185	0.0667921	0.046299	-2.37389	0.00866263	0.0176017	1.34255	1.20301	0.176502	0.266648	-2.50225
751	C377A	42	468	0.0897436	18	521	0.0345489	0.0606673	0.0542764	-2.97187	0.00898051	0.00295994	0.909792	1.02733	0.395495	0.0388988	-1.33827
752	C377I	35	582	0.0601375	35	635	0.0551181	0.0575185	0.057464	-3.68548	0.00809602	0.00022827	0.0872649	0.688417	0.630958	-0.538646	-0.664384
753	C377L	62	753	0.0823373	67	742	0.0902965	0.0862876	0.0861959	-0.146263	0.00730612	0.883714	0.0922401	0.942547	1.03366	-0.0853637	0.0477599
754	C377V	28	1502	0.0186418	64	1426	0.0448808	0.0314208	0.0285971	-10.7152	0.0052202	8.63704e-27	0.835084	0.2134	0.513768	-2.22837	-0.960812
755	C377F	138	1336	0.103293	110	1308	0.0840979	0.0937973	0.0933043	1.1719	0.00549626	0.241239	0.204649	1.18244	0.962701	0.241766	-0.054841
756	C377W	13	745	0.0174497	23	696	0.033046	0.0249827	0.023754	-8.38422	0.0074394	5.10637e-17	0.624286	0.199753	0.37829	-2.32371	-1.40244
757	C377Y	37	1644	0.0225061	37	1432	0.025838	0.0240572	0.0240001	-12.4292	0.00509278	1.81515e-35	0.138499	0.257636	0.295777	-1.9566	-1.75742
758	C377G	51	826	0.0617433	48	932	0.0515021	0.056314	0.0560832	-4.60782	0.00673686	4.06911e-06	0.181859	0.7068	0.589565	-0.500627	-0.762278
759	C377P	19	975	0.0194872	4	1019	0.00392542	0.0115346	0.0085929	-11.9894	0.00632406	4.0385e-33	1.34914	0.223077	0.0449358	-2.16438	-4.47599
760	I378H	25	1455	0.0171821	19	1124	0.0169039	0.0170609	0.0170603	-12.6402	0.00556124	1.2668e-36	0.0163073	0.19669	0.193506	-2.346	-2.36955
761	I378K	4	558	0.00716846	9	461	0.0195228	0.0127576	0.0112791	-8.4331	0.00884593	3.36619e-17	0.968388	0.0820601	0.223485	-3.60718	-2.16175
762	I378R	13	257	0.0505837	0	457	0	0.0182073	0	-6.54347	0.0105676	6.01064e-11	2.77821	0.579051	0	-0.788239	#NAME?
763	I378D	21	1003	0.0209372	11	666	0.0165165	0.0191732	0.0190466	-9.86365	0.00691256	5.98364e-23	0.230566	0.239676	0.189071	-2.06084	-2.403
764	I378E	8	552	0.0144928	3	780	0.00384615	0.00825826	0.0066647	-10.2232	0.00773713	1.56147e-24	1.28921	0.165904	0.0440284	-2.59158	-4.50542
765	I378C	53	1256	0.0421975	16	878	0.0182232	0.0323336	0.0298712	-8.99933	0.00611408	2.27096e-19	0.741463	0.48305	0.208608	-1.04975	-2.26113
766	I378M	23	773	0.0297542	51	658	0.0775076	0.0517121	0.0462103	-4.774	0.00746631	1.80604e-06	0.923447	0.340608	0.887259	-1.55382	-0.172572
767	I378N	43	1158	0.037133	29	876	0.033105	0.0353982	0.0353414	-8.29654	0.00626261	1.07189e-16	0.11379	0.425076	0.378966	-1.23421	-1.39986
768	I378Q	54	1326	0.040724	14	714	0.0196078	0.0333333	0.0315321	-8.63909	0.00625331	5.6665e-18	0.633484	0.466183	0.224459	-1.10103	-2.15548
769	I378S	44	1664	0.0264423	23	1075	0.0213953	0.0244615	0.0243332	-11.6541	0.00539681	2.18786e-31	0.206323	0.302695	0.244921	-1.72406	-2.02961
770	I378T	30	938	0.0319829	36	937	0.0384205	0.0352	0.0350525	-7.99626	0.00652258	1.28257e-15	0.182885	0.366121	0.439814	-1.44961	-1.18503
771	I378A	34	579	0.0587219	22	568	0.0387324	0.048823	0.0477864	-4.62085	0.008339	3.82178e-06	0.409429	0.672213	0.443385	-0.573011	-1.17337
772	I378I	67379	787475	0.0855634	66181	741437	0.0892604	0.0873562	0.0873367	0	0.00032294	1	0.0423221	0.979477	1.0218	-0.0299171	0.031111
773	I378L	19	1158	0.0164076	90	1194	0.0753769	0.0463435	0.0355803	-7.04121	0.00582467	1.90578e-12	1.27244	0.187824	0.862868	-2.41255	-0.212788
774	I378V	205	2122	0.096607	166	1935	0.0857881	0.0914469	0.0912865	0.921503	0.0044391	0.356788	0.118308	1.1059	0.98205	0.145217	-0.0261323
775	I378F	36	892	0.0403587	33	946	0.0348837	0.0375408	0.0374412	-7.56158	0.00658796	3.98196e-14	0.145842	0.462002	0.399327	-1.11403	-1.32436
776	I378W	5	1862	0.00268528	21	1601	0.0131168	0.00750794	0.0055905	-16.6383	0.00479906	3.67881e-62	1.3894	0.0307395	0.150153	-5.02376	-2.73549
777	I378Y	0	311	0	11	562	0.019573	0.0126002	0	-7.82218	0.00955693	5.19179e-15	1.55338	0	0.224059	#NAME?	-2.15805
778	I378G	29	602	0.0481728	5	657	0.00761035	0.0270056	0.0183907	-7.58281	0.00795888	3.38143e-14	1.502	0.551452	0.0871186	-0.858693	-3.52088
779	I378P	18	844	0.021327	13	1080	0.012037	0.0161123	0.01547	-11.0658	0.00643823	1.83892e-28	0.576578	0.244139	0.137793	-2.03423	-2.85943
780	N379H	146	1252	0.116613	173	1447	0.119558	0.118192	0.118183	5.66699	0.00544128	1.45329e-08	0.0249111	1.33492	1.36862	0.416752	0.452725
781	N379K	54	603	0.0895522	59	617	0.095624	0.092623	0.0925732	0.651237	0.00808724	0.514893	0.0655534	1.02514	1.09464	0.0358194	0.130462
782	N379R	208	1689	0.12315	150	1703	0.0880799	0.105542	0.104077	3.74629	0.00485447	0.000179472	0.332283	1.40974	1.00828	0.495432	0.0119021
783	N379D	30	880	0.0340909	18	782	0.0230179	0.0288809	0.0283388	-8.44107	0.00692748	3.14432e-17	0.383403	0.390252	0.263495	-1.35752	-1.92415
784	N379E	56	883	0.0634202	30	561	0.0534759	0.0595568	0.0593542	-3.74004	0.00743293	0.000183991	0.16697	0.725995	0.61216	-0.461969	-0.70802
785	N379C	78	1213	0.0643034	99	1192	0.0830537	0.0735967	0.072998	-2.38821	0.00576146	0.0169308	0.254771	0.736106	0.950748	-0.442016	-0.0728658
786	N379M	22	644	0.0341615	34	359	0.0947075	0.0558325	0.0492089	-3.53504	0.0089175	0.00040771	1.08442	0.39106	1.08415	-1.35454	0.116569
787	N379N	67379	787475	0.0855634	66181	741437	0.0892604	0.0873562	0.0873367	0	0.00032294	1	0.0423221	0.979477	1.0218	-0.0299171	0.031111
788	N379Q	42	534	0.0786517	15	438	0.0342466	0.058642	0.0540747	-3.16983	0.00905861	0.00152527	0.757224	0.900356	0.392034	-0.151432	-1.35095
789	N379S	164	1093	0.150046	101	1429	0.0706788	0.105075	0.0979441	3.14842	0.00562793	0.00164154	0.755334	1.71763	0.809087	0.78042	-0.305633
790	N379T	79	716	0.110335	51	914	0.0557987	0.0797546	0.075281	-1.0864	0.00699708	0.277302	0.683804	1.26305	0.638749	0.336911	-0.646679
791	N379A	91	841	0.108205	121	1371	0.0882567	0.0958409	0.0953662	1.41217	0.00600823	0.1579	0.208134	1.23866	1.01031	0.308779	0.0147965
792	N379I	170	1966	0.08647	116	1815	0.0639118	0.0756414	0.0747902	-2.54843	0.00459691	0.010821	0.298225	0.989855	0.731623	-0.0147106	-0.450827
793	N379L	57	1843	0.0309278	113	1736	0.0650922	0.0474993	0.0443719	-8.43896	0.00472297	3.20181e-17	0.71926	0.354043	0.745135	-1.498	-0.424426
794	N379V	58	1011	0.0573689	48	1290	0.0372093	0.0460669	0.0450054	-7.01151	0.00588879	2.35767e-12	0.437616	0.656724	0.425949	-0.60664	-1.23125
795	N379F	88	1346	0.0653789	46	1051	0.0437678	0.0559032	0.0548303	-5.45091	0.00577023	5.01115e-08	0.38658	0.748417	0.501027	-0.418085	-0.997039
796	N379W	94	1235	0.0761134	80	1473	0.0543109	0.0642541	0.063348	-4.25488	0.00542957	2.09162e-05	0.339316	0.871299	0.621718	-0.19876	-0.685668
797	N379Y	73	1389	0.0525558	99	1240	0.0798387	0.0654241	0.0640134	-3.98006	0.0055105	6.88971e-05	0.417016	0.601626	0.913944	-0.73306	-0.129822
798	N379G	143	1709	0.0836747	128	1438	0.0890125	0.0861138	0.0860728	-0.246603	0.00503837	0.805215	0.0619861	0.957856	1.01896	-0.0621193	0.0270981
799	N379P	82	1254	0.0653907	59	874	0.0675057	0.0662594	0.0662513	-3.44484	0.00612418	0.00057139	0.0319196	0.748553	0.772764	-0.417824	-0.3719
800	G380H	19	406	0.046798	37	419	0.0883055	0.0678788	0.0646071	-1.98092	0.0098325	0.0475997	0.611494	0.535715	1.01087	-0.900462	0.015593
801	G380K	8	703	0.0113798	3	602	0.00498339	0.00842912	0.00777512	-10.0972	0.00781675	5.68549e-24	0.758847	0.130269	0.0570468	-2.94043	-4.13171
802	G380R	98	897	0.109253	14	643	0.0217729	0.0727273	0.0557115	-2.03231	0.00719818	0.0421219	1.20285	1.25066	0.249243	0.322692	-2.00437
803	G380D	11	1384	0.00794798	20	1419	0.0140944	0.0110596	0.010622	-14.3033	0.0053342	2.08714e-46	0.555759	0.0909835	0.161344	-3.45825	-2.63178
804	G380E	2	726	0.00275482	6	876	0.00684932	0.00499376	0.00453303	-11.6743	0.00705505	1.72551e-31	0.819922	0.0315355	0.0784067	-4.98688	-3.67288
805	G380C	37	617	0.0599676	40	1007	0.0397219	0.0474138	0.0464509	-5.69895	0.00700874	1.20548e-08	0.426999	0.686472	0.454712	-0.542727	-1.13697
806	G380M	4	503	0.00795229	14	313	0.0447284	0.0220588	0.0154245	-6.6055	0.00988531	3.96169e-11	1.66719	0.0910329	0.512024	-3.45747	-0.965718
807	G380N	3	507	0.00591716	7	623	0.011236	0.00884956	0.00842667	-9.34584	0.00840018	9.1166e-21	0.601024	0.067736	0.128622	-3.88393	-2.95879
808	G380Q	20	504	0.0396825	1	267	0.00374532	0.0272374	0.0175227	-5.91152	0.0101698	3.38966e-09	1.31941	0.454261	0.0428741	-1.13841	-4.54375
809	G380S	48	1376	0.0348837	44	1075	0.0409302	0.0375357	0.0374172	-8.732	0.00570551	2.50198e-18	0.161087	0.399327	0.468544	-1.32436	-1.09374
810	G380T	15	530	0.0283019	1	641	0.00156006	0.0136635	0.00579193	-8.9303	0.00825199	4.24867e-19	1.95717	0.323983	0.0178586	-1.62601	-5.80723
811	G380A	38	528	0.0719697	34	472	0.0720339	0.072	0.072	-1.71936	0.00893135	0.0855481	0.000891685	0.823865	0.8246	-0.279521	-0.278234
812	G380I	0	369	0	0	307	0	0	0	-8.04379	0.0108601	8.7105e-16		0	0	#NAME?	#NAME?
813	G380L	15	1090	0.0137615	14	888	0.0157658	0.0146613	0.0146277	-11.4485	0.00634971	2.3912e-30	0.136707	0.157533	0.180477	-2.66628	-2.47011
814	G380V	26	748	0.0347594	14	674	0.0207715	0.0281294	0.0272325	-7.90847	0.00748904	2.60564e-15	0.497268	0.397904	0.237779	-1.32951	-2.0723
815	G380F	8	672	0.0119048	15	313	0.0479233	0.0233503	0.0185317	-7.11367	0.0089976	1.12995e-12	1.54253	0.136278	0.548597	-2.87537	-0.866182
816	G380W	10	878	0.0113895	40	818	0.0488998	0.0294811	0.0229992	-8.43938	0.00685774	3.19023e-17	1.27235	0.13038	0.559774	-2.9392	-0.837083
817	G380Y	12	905	0.0132597	5	610	0.00819672	0.0112211	0.0109251	-10.4942	0.00725499	9.18803e-26	0.451198	0.151789	0.093831	-2.71987	-3.41379
818	G380G	67379	787475	0.0855634	66181	741437	0.0892604	0.0873562	0.0873367	0	0.00032294	1	0.0423221	0.979477	1.0218	-0.0299171	0.031111
819	G380P	65	1250	0.052	102	1309	0.0779221	0.0652599	0.0639524	-3.9562	0.00558525	7.61511e-05	0.397213	0.595264	0.892004	-0.748398	-0.164878
820	E381H	117	1285	0.0910506	100	857	0.116686	0.101307	0.100551	2.2849	0.0061057	0.0223184	0.253047	1.04229	1.33575	0.0597582	0.417651
821	E381K	134	1016	0.13189	61	556	0.109712	0.124046	0.123575	5.14829	0.00712655	2.62866e-07	0.178785	1.50979	1.25592	0.594351	0.328742
822	E381R	67	767	0.0873533	155	796	0.194724	0.142035	0.131395	7.64979	0.00714769	2.01305e-14	0.755945	0.999967	2.22908	-4.74876e-05	1.15645
823	E381D	90	712	0.126404	32	468	0.0683761	0.10339	0.0990658	1.94975	0.00822341	0.0512059	0.561259	1.447	0.782727	0.533066	-0.353419
824	E381E	67379	787475	0.0855634	66181	741437	0.0892604	0.0873562	0.0873367	0	0.00032294	1	0.0423221	0.979477	1.0218	-0.0299171	0.031111
825	E381C	67	822	0.0815085	51	648	0.0787037	0.0802721	0.08026	-0.961511	0.00736771	0.336295	0.0349413	0.933059	0.900952	-0.0999593	-0.150479
826	E381M	73	776	0.0940722	32	825	0.0387879	0.065584	0.0595924	-3.08407	0.00705957	0.00204186	0.842954	1.07688	0.44402	0.106858	-1.1713
827	E381N	138	1176	0.117347	98	943	0.103924	0.111373	0.111172	3.91212	0.00613914	9.14896e-05	0.120525	1.34332	1.18965	0.425798	0.250542
828	E381Q	27	575	0.0469565	63	730	0.0863014	0.0689655	0.0660015	-2.3521	0.00781884	0.0186676	0.5705	0.537529	0.987925	-0.895585	-0.0175266
829	E381S	146	1120	0.130357	135	881	0.153235	0.14043	0.139976	8.39971	0.0063185	4.47591e-17	0.162913	1.49225	1.75414	0.577488	0.810763
830	E381T	42	627	0.0669856	95	728	0.130495	0.101107	0.0958475	1.79176	0.00767446	0.0731717	0.628135	0.76681	1.49382	-0.383058	0.579007
831	E381A	67	674	0.0994065	65	620	0.104839	0.102009	0.101973	1.86589	0.00785312	0.062057	0.0532518	1.13794	1.20013	0.18643	0.263189
832	E381I	69	712	0.0969101	34	471	0.0721868	0.0870668	0.0861872	-0.0352463	0.00821245	0.971883	0.283958	1.10937	0.82635	0.149737	-0.275174
833	E381L	31	537	0.0577281	58	695	0.0834532	0.0722403	0.0710687	-1.87844	0.00804711	0.0603215	0.356105	0.660836	0.955321	-0.597636	-0.0659421
834	E381V	118	1461	0.0807666	184	1365	0.134799	0.106865	0.103438	3.66887	0.00531733	0.000243624	0.50561	0.924566	1.54309	-0.113151	0.625823
835	E381F	70	1006	0.0695825	83	888	0.0934685	0.0807814	0.079908	-1.01281	0.0064917	0.311153	0.295686	0.796538	1.06997	-0.328185	0.0975697
836	E381W	11	554	0.0198556	44	500	0.088	0.0521822	0.0402364	-4.04343	0.00869906	5.26743e-05	1.30589	0.227295	1.00737	-2.13736	0.0105934
837	E381Y	31	397	0.0780856	60	744	0.0806452	0.0797546	0.0797452	-0.909082	0.00836188	0.363307	0.0320924	0.893876	0.923176	-0.161853	-0.115322
838	E381G	45	640	0.0703125	89	917	0.0970556	0.0860629	0.0850118	-0.180645	0.00715931	0.856646	0.310739	0.804894	1.11103	-0.313129	0.151902
839	E381P	40	396	0.10101	34	253	0.134387	0.114022	0.112902	2.40522	0.0110865	0.0161629	0.292728	1.1563	1.53838	0.209518	0.621415
840	Y382H	91	828	0.109903	36	814	0.044226	0.0773447	0.069989	-1.43609	0.0069714	0.150978	0.849151	1.25811	0.506273	0.331254	-0.982014
841	Y382K	46	795	0.0578616	18	404	0.0445545	0.0533778	0.0529843	-4.16586	0.0081564	3.10179e-05	0.249302	0.662364	0.510032	-0.594303	-0.97134
842	Y382R	128	839	0.152563	29	606	0.0478548	0.108651	0.0938171	2.86516	0.00743214	0.00416798	0.963712	1.74644	0.547812	0.804419	-0.868247
843	Y382D	35	729	0.048011	26	555	0.0468468	0.0475078	0.0475043	-5.05579	0.00788174	4.28608e-07	0.0245039	0.5496	0.536274	-0.863546	-0.898958
844	Y382E	84	838	0.100239	94	1105	0.0850679	0.0916109	0.0913069	0.663769	0.00640987	0.506838	0.1656	1.14747	0.973805	0.198457	-0.0382957
845	Y382C	100	1037	0.096432	102	878	0.116173	0.105483	0.105028	2.80727	0.00645708	0.00499626	0.18715	1.10389	1.32988	0.142602	0.411294
846	Y382M	172	1303	0.132003	98	1090	0.0899083	0.112829	0.110819	4.40882	0.0057777	1.03936e-05	0.373085	1.51109	1.02921	0.595589	0.0415435
847	Y382N	23	428	0.0537383	55	514	0.107004	0.0828025	0.078252	-0.494839	0.00920237	0.620714	0.643284	0.615163	1.22491	-0.700959	0.292681
848	Y382Q	29	454	0.0638767	43	573	0.0750436	0.0701071	0.0698847	-1.9572	0.00881317	0.0503241	0.159285	0.731221	0.859053	-0.451621	-0.21918
849	Y382S	51	493	0.103448	56	523	0.107075	0.105315	0.105299	2.02653	0.0088618	0.0427102	0.0344328	1.18421	1.22572	0.243928	0.293634
850	Y382T	11	426	0.0258216	6	209	0.0287081	0.0267717	0.0267381	-5.40652	0.0112058	6.42613e-08	0.107821	0.29559	0.328633	-1.75833	-1.60545
851	Y382A	115	1432	0.0803073	169	1397	0.120974	0.100389	0.0983155	2.45242	0.00531418	0.01419	0.405087	0.919308	1.38483	-0.12138	0.469709
852	Y382I	16	832	0.0192308	43	889	0.048369	0.0342824	0.0309681	-7.79585	0.00680796	6.39782e-15	0.849946	0.220142	0.553698	-2.18349	-0.852829
853	Y382L	55	1258	0.0437202	47	1013	0.0463968	0.0449141	0.0448945	-7.16023	0.00592748	8.05405e-13	0.0595948	0.500482	0.531122	-0.99861	-0.912884
854	Y382V	53	1394	0.0380201	47	1236	0.0380259	0.0380228	0.0380228	-8.95651	0.00550811	3.35115e-19	0.000152642	0.435231	0.435297	-1.20015	-1.19993
855	Y382F	28	853	0.0328253	77	845	0.0911243	0.0618375	0.0545603	-3.72266	0.00685498	0.000197132	0.942777	0.375764	1.04313	-1.4121	0.0609251
856	Y382W	71	805	0.0881988	96	659	0.145675	0.114071	0.11055	3.61793	0.00738401	0.000296974	0.503866	1.00965	1.6676	0.0138482	0.737774
857	Y382Y	67379	787475	0.0855634	66181	741437	0.0892604	0.0873562	0.0873367	0	0.00032294	1	0.0423221	0.979477	1.0218	-0.0299171	0.031111
858	Y382G	48	768	0.0625	40	657	0.0608828	0.0617544	0.0617491	-3.42163	0.00748236	0.000622479	0.0261876	0.715462	0.696949	-0.483054	-0.520875
859	Y382P	5	329	0.0151976	1	161	0.00621118	0.0122449	0.0113264	-5.88831	0.012756	3.90171e-09	0.733888	0.173972	0.0711018	-2.52307	-3.81397
860	M383H	9	386	0.0233161	35	647	0.0540958	0.0425944	0.0394989	-5.09427	0.00878671	3.50089e-07	0.722625	0.266908	0.619256	-1.90559	-0.691393
861	M383K	18	502	0.0358566	20	378	0.0529101	0.0431818	0.0423788	-4.64031	0.00951972	3.47891e-06	0.394923	0.410464	0.605682	-1.28467	-0.723368
862	M383R	4	560	0.00714286	15	369	0.0406504	0.0204521	0.0142507	-7.22142	0.00926468	5.1447e-13	1.63834	0.081767	0.465341	-3.61234	-1.10364
863	M383D	7	1310	0.00534351	0	1141	0	0.00285598	0	-14.8146	0.00570387	1.17972e-49	1.87099	0.0611692	0	-4.03105	#NAME?
864	M383E	13	544	0.0238971	1	578	0.0017301	0.0124777	0.00617919	-8.88219	0.00843018	6.55545e-19	1.77652	0.273559	0.0198052	-1.87008	-5.65798
865	M383C	337	3629	0.092863	254	3086	0.0823072	0.0880119	0.0878535	0.18987	0.00345329	0.849411	0.119937	1.06304	0.942202	0.0881945	-0.0858916
866	M383M	67379	787475	0.0855634	66181	741437	0.0892604	0.0873562	0.0873367	0	0.00032294	1	0.0423221	0.979477	1.0218	-0.0299171	0.031111
867	M383N	7	485	0.014433	8	471	0.0169851	0.0156904	0.0156385	-7.84709	0.00913279	4.25802e-15	0.162657	0.16522	0.194435	-2.59754	-2.36264
868	M383Q	11	458	0.0240175	65	643	0.101089	0.0690282	0.0555974	-2.15321	0.00851198	0.0313022	1.11652	0.274937	1.1572	-1.86283	0.210639
869	M383S	39	1340	0.0291045	80	1357	0.0589536	0.0441231	0.0415146	-7.94782	0.00543962	1.89819e-15	0.676496	0.33317	0.674864	-1.58567	-0.567331
870	M383T	64	931	0.0687433	74	1123	0.0658949	0.067186	0.0671711	-3.23581	0.00623344	0.00121297	0.0423952	0.786931	0.754325	-0.345691	-0.406743
871	M383A	15	1282	0.0117005	79	1309	0.0603514	0.0362794	0.0268014	-9.20421	0.00554929	3.44193e-20	1.34101	0.13394	0.690866	-2.90034	-0.533523
872	M383I	101	1034	0.0976789	173	1201	0.144047	0.122595	0.120352	5.89427	0.00597849	3.76343e-09	0.378218	1.11817	1.64896	0.161137	0.721554
873	M383L	100	1102	0.0907441	153	1156	0.132353	0.112046	0.110087	4.15126	0.00594755	3.30649e-05	0.371355	1.03878	1.51509	0.0548938	0.599408
874	M383V	146	1250	0.1168	89	893	0.0996641	0.109659	0.109328	3.65346	0.00610465	0.000258727	0.156265	1.33705	1.14089	0.419058	0.190163
875	M383F	23	399	0.0576441	23	319	0.0721003	0.0640669	0.0636696	-2.20976	0.0105393	0.0271218	0.225642	0.659874	0.82536	-0.599737	-0.276905
876	M383W	81	672	0.120536	26	722	0.0360111	0.0767575	0.0644713	-1.40091	0.00756558	0.161241	1.10119	1.37982	0.412233	0.464479	-1.27847
877	M383Y	15	647	0.0231839	27	754	0.035809	0.0299786	0.0292954	-7.60472	0.007545	2.85513e-14	0.421137	0.265395	0.40992	-1.91379	-1.28659
878	M383G	6	733	0.00818554	3	593	0.00505902	0.00678733	0.00660069	-10.3899	0.00775456	2.7571e-25	0.46064	0.093703	0.0579126	-3.41576	-4.10998
879	M383P	23	674	0.0341246	30	722	0.0415512	0.0379656	0.037783	-6.5342	0.00755878	6.39485e-11	0.195614	0.390638	0.475653	-1.3561	-1.07202
880	S384H	72	823	0.0874848	52	641	0.0811232	0.0846995	0.0846403	-0.359855	0.00738294	0.718956	0.0751075	1.00147	0.928649	0.00212247	-0.106795
881	S384K	78	2880	0.0270833	84	2346	0.0358056	0.0309989	0.0306995	-14.4188	0.00390861	3.94151e-47	0.281375	0.310033	0.409881	-1.6895	-1.28672
882	S384R	98	1648	0.059466	67	1616	0.0414604	0.0505515	0.0497415	-7.44209	0.00494549	9.91063e-14	0.356184	0.68073	0.474613	-0.554845	-1.07518
883	S384D	283	3826	0.0739676	218	3537	0.0616342	0.0680429	0.067762	-5.85803	0.0032969	4.68386e-09	0.18126	0.846735	0.70555	-0.240017	-0.50318
884	S384E	135	1211	0.111478	127	1295	0.0980695	0.104549	0.104335	3.04524	0.00564581	0.00232493	0.128252	1.27613	1.12264	0.351779	0.166894
885	S384C	399	4028	0.0990566	335	3320	0.100904	0.0998911	0.0998869	3.79517	0.00330285	0.00014754	0.0184902	1.13394	1.15508	0.181343	0.207996
886	S384M	120	2834	0.042343	66	2260	0.0292035	0.0365135	0.0359086	-12.8416	0.00395923	9.59125e-38	0.359851	0.484716	0.334304	-1.04479	-1.58077
887	S384N	169	1917	0.0881586	233	2022	0.115232	0.102056	0.101151	3.26267	0.00450555	0.00110369	0.265283	1.00919	1.31911	0.0131909	0.399565
888	S384Q	170	2830	0.0600707	124	2607	0.0475643	0.0540739	0.0537094	-8.6814	0.00383375	3.9092e-18	0.231284	0.687652	0.544486	-0.540249	-0.877032
889	S384S	67379	787475	0.0855634	66181	741437	0.0892604	0.0873562	0.0873367	0	0.00032294	1	0.0423221	0.979477	1.0218	-0.0299171	0.031111
890	S384T	78	1391	0.0560748	97	1322	0.0733737	0.0645042	0.0639247	-4.21267	0.00542459	2.52369e-05	0.268183	0.641909	0.839937	-0.639558	-0.251648
891	S384A	189	3373	0.0560332	174	3142	0.0553787	0.0557176	0.0557166	-9.03143	0.00350317	1.69447e-19	0.0117461	0.641434	0.633942	-0.640628	-0.657578
892	S384I	72	3230	0.022291	95	2947	0.0322362	0.0270358	0.0265807	-16.7775	0.00359532	3.56648e-63	0.367851	0.255174	0.36902	-1.97045	-1.43823
893	S384L	37	1105	0.0334842	71	1657	0.0428485	0.0391021	0.038823	-8.97744	0.00537504	2.77137e-19	0.239485	0.383306	0.490503	-1.38343	-1.02766
894	S384V	29	923	0.0314193	25	741	0.0337382	0.0324519	0.0324316	-7.93019	0.00692346	2.18812e-15	0.0714567	0.359669	0.386214	-1.47526	-1.37253
895	S384F	65	2780	0.0233813	76	2653	0.0286468	0.0259525	0.0258191	-16.019	0.00383317	9.41123e-58	0.202891	0.267655	0.327931	-1.90156	-1.60854
896	S384W	17	835	0.0203593	35	1085	0.0322581	0.0270833	0.0264066	-9.35131	0.00644539	8.6566e-21	0.43934	0.233061	0.36927	-2.10122	-1.43725
897	S384Y	30	1644	0.0182482	91	1327	0.0685757	0.040727	0.0329626	-8.99692	0.0051828	2.32149e-19	1.23573	0.208894	0.785013	-2.25916	-0.349212
898	S384G	321	8884	0.0361324	329	8313	0.0395766	0.0377973	0.0377582	-22.9544	0.00215902	1.33246e-116	0.0911228	0.413621	0.453048	-1.27362	-1.14226
899	S384P	9	781	0.0115237	4	941	0.0042508	0.00754936	0.00668204	-11.7278	0.00680493	9.18072e-32	0.963378	0.131916	0.0486605	-2.92231	-4.3611
900	D385H	112	966	0.115942	65	812	0.0800493	0.0995501	0.0978964	1.8198	0.00670063	0.0687894	0.36055	1.32723	0.916355	0.408422	-0.126022
901	D385K	89	617	0.144246	78	653	0.119449	0.131496	0.130913	5.56765	0.0079279	2.58192e-08	0.188581	1.65124	1.36738	0.723553	0.451409
902	D385R	146	1083	0.134811	101	1188	0.0850168	0.108763	0.105922	3.60962	0.00593038	0.000306647	0.457821	1.54323	0.97322	0.625953	-0.0391615
903	D385D	67379	787475	0.0855634	66181	741437	0.0892604	0.0873562	0.0873367	0	0.00032294	1	0.0423221	0.979477	1.0218	-0.0299171	0.031111
904	D385E	198	2598	0.0762125	350	3505	0.0998573	0.0897919	0.0890068	0.67252	0.0036217	0.501253	0.26333	0.872433	1.14311	-0.196883	0.192958
905	D385C	153	1669	0.0916717	103	1564	0.0658568	0.0791834	0.0781178	-1.64421	0.00497067	0.100133	0.326014	1.0494	0.753888	0.0695657	-0.407578
906	D385M	65	1202	0.0540765	61	1359	0.0448859	0.0491995	0.0489869	-6.83531	0.00558229	8.18287e-12	0.186802	0.619035	0.513827	-0.691907	-0.960646
907	D385N	156	1076	0.144981	153	1290	0.118605	0.1306	0.129946	7.4413	0.00581134	9.96965e-14	0.201966	1.65966	1.35771	0.730886	0.441179
908	D385Q	349	2745	0.12714	300	2888	0.103878	0.115214	0.114628	7.38735	0.003771	1.49779e-13	0.201904	1.45542	1.18913	0.541439	0.24991
909	D385S	88	792	0.111111	185	964	0.191909	0.155467	0.149986	10.0985	0.00674466	5.61132e-24	0.519709	1.27193	2.19685	0.347021	1.13544
910	D385T	140	1431	0.0978337	115	1377	0.0835149	0.090812	0.0905288	0.64793	0.00533349	0.51703	0.157675	1.11994	0.956027	0.163421	-0.0648767
911	D385A	173	2023	0.0855166	216	2082	0.103746	0.0947625	0.0943224	1.67815	0.00441334	0.0933181	0.192374	0.978941	1.18762	-0.0307063	0.248079
912	D385I	52	713	0.0729313	49	666	0.0735736	0.0732415	0.0732408	-1.85563	0.00760646	0.0635067	0.00876958	0.834872	0.842225	-0.260372	-0.247722
913	D385L	48	994	0.0482897	28	918	0.0305011	0.039749	0.0387303	-7.37025	0.00645939	1.70312e-13	0.447525	0.552791	0.349158	-0.855193	-1.51805
914	D385V	153	1172	0.130546	96	1032	0.0930233	0.112976	0.111391	4.25593	0.00601988	2.08182e-05	0.33213	1.49441	1.06487	0.579577	0.0906813
915	D385F	142	1945	0.0730077	121	1772	0.0682844	0.070756	0.0707166	-3.58077	0.00463594	0.000342581	0.0667546	0.835747	0.781678	-0.258861	-0.355354
916	D385W	145	1163	0.124678	104	915	0.113661	0.119827	0.119701	5.23746	0.00619967	1.62805e-07	0.0919357	1.42723	1.30112	0.51322	0.379758
917	D385Y	187	1437	0.130132	242	2092	0.115679	0.121564	0.12136	7.18584	0.00476047	6.67949e-13	0.118896	1.48967	1.32422	0.574996	0.405142
918	D385G	246	1934	0.127198	184	1916	0.0960334	0.111688	0.110595	5.33861	0.00455775	9.36603e-08	0.279028	1.45608	1.09933	0.542089	0.136626
919	D385P	104	941	0.110521	108	568	0.190141	0.14049	0.135562	7.30447	0.00727419	2.78357e-13	0.56673	1.26517	2.17662	0.339335	1.12209
920	R386H	355	3636	0.0976348	335	3509	0.0954688	0.096571	0.096565	2.75157	0.00334892	0.00593107	0.0224288	1.11766	1.09287	0.160485	0.128119
921	R386K	462	3721	0.12416	284	3497	0.0812125	0.103353	0.10108	4.80003	0.00333258	1.58642e-06	0.415545	1.42131	0.92967	0.50722	-0.105209
922	R386R	67379	787475	0.0855634	66181	741437	0.0892604	0.0873562	0.0873367	0	0.00032294	1	0.0423221	0.979477	1.0218	-0.0299171	0.031111
923	R386D	170	1838	0.0924918	160	1798	0.0889878	0.0907591	0.0907422	0.725808	0.00468835	0.467957	0.0386085	1.05879	1.01868	0.082416	0.0266969
924	R386E	241	3056	0.0788613	264	3132	0.0842912	0.0816096	0.0815644	-1.59797	0.00359623	0.110049	0.0665355	0.902755	0.964914	-0.147593	-0.0515283
925	R386C	122	1773	0.0688099	104	1304	0.0797546	0.0734482	0.0732517	-2.72998	0.00509457	0.00633383	0.149012	0.787694	0.912982	-0.344293	-0.131342
926	R386M	261	3184	0.0819724	329	3463	0.0950043	0.0887618	0.0885218	0.404971	0.00347089	0.685499	0.146819	0.938369	1.08755	-0.0917725	0.121083
927	R386N	134	1654	0.0810157	160	1274	0.125589	0.10041	0.0980406	2.49889	0.00522376	0.0124584	0.44391	0.927418	1.43766	-0.108708	0.523725
928	R386Q	99	1014	0.0976331	144	1142	0.126095	0.112709	0.111801	4.16544	0.00608639	3.10751e-05	0.252522	1.11764	1.44345	0.160461	0.529524
929	R386S	1166	9240	0.12619	751	8656	0.0867606	0.107119	0.105276	9.29792	0.00212549	1.43218e-20	0.368094	1.44455	0.993182	0.530621	-0.0098696
930	R386T	555	5623	0.0987018	634	6656	0.0952524	0.096832	0.0968168	3.70247	0.00255931	0.000213515	0.0356221	1.12988	1.09039	0.176166	0.124845
931	R386A	203	1891	0.107351	205	2739	0.0748448	0.088121	0.0867238	0.184005	0.00415594	0.85401	0.368877	1.22888	0.856778	0.297348	-0.223007
932	R386I	163	1439	0.113273	88	1270	0.0692913	0.0926541	0.0899624	0.975671	0.00542998	0.329228	0.474688	1.29668	0.793205	0.374823	-0.334235
933	R386L	181	1821	0.0993959	149	1853	0.0804101	0.0898204	0.089318	0.528323	0.00466404	0.597275	0.211375	1.13782	0.920486	0.186277	-0.119533
934	R386V	214	2174	0.0984361	137	1924	0.0712058	0.0856515	0.0845522	-0.385981	0.00441654	0.699511	0.317919	1.12684	0.81512	0.172277	-0.294915
935	R386F	138	1192	0.115772	65	914	0.071116	0.0963913	0.093703	1.46735	0.00615737	0.14228	0.463277	1.32528	0.814092	0.406302	-0.296736
936	R386W	131	1796	0.0729399	138	1504	0.0917553	0.0815152	0.080982	-1.18717	0.00492017	0.23516	0.230822	0.834971	1.05036	-0.260203	0.0708817
937	R386Y	243	2063	0.11779	152	1824	0.0833333	0.101621	0.100134	3.1451	0.00453548	0.00166028	0.339067	1.34838	0.953949	0.43123	-0.0680164
938	R386G	252	3107	0.0811072	392	4328	0.090573	0.0866174	0.0864899	-0.2251	0.00328248	0.821901	0.109283	0.928465	1.03682	-0.107081	0.0521711
939	R386P	134	2067	0.0648283	66	1311	0.0503432	0.0592066	0.0587682	-5.78982	0.00486192	7.0463e-09	0.244652	0.742114	0.576299	-0.430287	-0.795112
940	G387H	16	1648	0.00970874	31	1423	0.021785	0.0153045	0.0141189	-14.1376	0.00509646	2.22697e-45	0.789066	0.11114	0.249381	-3.16955	-2.00358
941	G387K	10	3880	0.00257732	20	4479	0.00446528	0.00358895	0.00345988	-27.1142	0.00308942	6.69567e-162	0.526049	0.0295036	0.0511158	-5.08297	-4.29009
942	G387R	24	1346	0.0178306	2	1180	0.00169492	0.010293	0.00593935	-13.7149	0.00561893	8.26289e-43	1.56764	0.204114	0.0194023	-2.29255	-5.68763
943	G387D	23	2277	0.010101	16	1916	0.00835073	0.00930122	0.00925981	-17.8958	0.00436164	1.27123e-71	0.188177	0.11563	0.095594	-3.11241	-3.38694
944	G387E	49	2744	0.0178571	6	2151	0.0027894	0.011236	0.0078977	-18.8552	0.00403709	2.66156e-79	1.34103	0.204418	0.0319313	-2.29041	-4.96888
945	G387C	8	2285	0.00350109	24	1978	0.0121335	0.00750645	0.00623244	-18.4599	0.00432558	4.34269e-76	1.14999	0.0400784	0.138896	-4.64103	-2.84792
946	G387M	7	1429	0.00489853	6	1392	0.00431034	0.00460829	0.00459889	-15.5634	0.00531684	1.2911e-54	0.127636	0.0560754	0.0493422	-4.15649	-4.34103
947	G387N	13	1446	0.00899032	1	1067	0.000937207	0.00557103	0.00344232	-14.5184	0.00563321	9.26499e-48	1.44553	0.102916	0.0107286	-3.28047	-6.5424
948	G387Q	15	943	0.0159067	28	1510	0.018543	0.0175296	0.0174815	-12.2455	0.00570224	1.77608e-34	0.150395	0.18209	0.212269	-2.45728	-2.23603
949	G387S	21	3064	0.00685379	13	2815	0.00461812	0.0057833	0.00567321	-22.1447	0.00368363	1.17228e-108	0.386573	0.0784579	0.0528654	-3.67194	-4.24153
950	G387T	19	3155	0.00602219	6	2639	0.00227359	0.00431481	0.0038643	-22.3806	0.00371042	6.08553e-111	0.868775	0.0689383	0.0260266	-3.85855	-5.26387
951	G387A	29	1577	0.0183893	0	987	0	0.0113105	0	-13.6351	0.0055772	2.47567e-42	1.62587	0.21051	0	-2.24804	#NAME?
952	G387I	11	1222	0.00900164	14	1367	0.0102414	0.00965624	0.00963629	-13.9997	0.00555013	1.56614e-44	0.12839	0.103045	0.117237	-3.27865	-3.0925
953	G387L	2	1014	0.00197239	5	1242	0.00402576	0.00310284	0.00292131	-14.1716	0.00594523	1.37362e-45	0.661774	0.0225787	0.0460845	-5.4689	-4.43958
954	G387V	41	2121	0.0193305	14	1746	0.00801833	0.0142229	0.0129925	-16.1017	0.00454197	2.48224e-58	0.795349	0.221284	0.0917889	-2.17603	-3.44554
955	G387F	13	1888	0.00688559	7	2013	0.0034774	0.00512689	0.00483999	-18.1859	0.0045216	6.67449e-74	0.664769	0.078822	0.0398071	-3.66526	-4.65083
956	G387W	12	4000	0.003	3	3563	0.000841987	0.00198334	0.00164875	-26.2872	0.00324769	2.68296e-152	1.08807	0.0343422	0.00963855	-4.86388	-6.69697
957	G387Y	9	3089	0.00291356	7	3023	0.00231558	0.0026178	0.00260064	-23.4568	0.00361254	1.12746e-121	0.22843	0.0333527	0.0265073	-4.90605	-5.23746
958	G387G	67379	787475	0.0855634	66181	741437	0.0892604	0.0873562	0.0873367	0	0.00032294	1	0.0423221	0.979477	1.0218	-0.0299171	0.031111
959	G387P	37	5726	0.00646175	24	5930	0.00404722	0.00523336	0.00509302	-31.383	0.0026168	3.45247e-216	0.461374	0.0739702	0.0463301	-3.75691	-4.43191
960	L388H	166	2029	0.0818137	86	1757	0.0489471	0.066561	0.06446	-4.52725	0.00459334	5.97555e-06	0.493782	0.936553	0.560316	-0.0945676	-0.835688
961	L388K	197	2256	0.0873227	306	2055	0.148905	0.116678	0.11262	6.80595	0.00430829	1.00385e-11	0.527797	0.999616	1.70457	-0.000553443	0.769411
962	L388R	259	2579	0.100427	273	2797	0.0976046	0.0989583	0.0989483	3.00687	0.00385853	0.00263951	0.0285165	1.14962	1.11732	0.201158	0.160039
963	L388D	40	776	0.0515464	143	1136	0.12588	0.0957113	0.0876158	1.29301	0.00646173	0.196008	0.776647	0.590071	1.441	-0.761039	0.52707
964	L388E	92	1050	0.087619	137	1268	0.108044	0.0987921	0.0982605	1.94831	0.0058696	0.0513775	0.206749	1.00301	1.23682	0.00433443	0.306639
965	L388C	192	2791	0.0687925	361	3268	0.110465	0.0912692	0.0888136	1.0765	0.00363489	0.281704	0.45659	0.787495	1.26454	-0.344658	0.338609
966	L388M	89	1133	0.0785525	158	1259	0.125496	0.103261	0.100521	2.7524	0.00577846	0.00591605	0.454615	0.899221	1.43661	-0.153253	0.522664
967	L388N	105	994	0.105634	141	1225	0.115102	0.110861	0.11076	3.91779	0.00599944	8.93658e-05	0.0854066	1.20923	1.31762	0.27409	0.397931
968	L388Q	101	1427	0.0707779	131	1267	0.103394	0.0861173	0.0845879	-0.227549	0.00544473	0.819997	0.378739	0.810221	1.18359	-0.303612	0.243168
969	L388S	216	2746	0.0786599	272	2977	0.0913671	0.08527	0.0850324	-0.557946	0.00373921	0.576882	0.149024	0.90045	1.04591	-0.151282	0.0647654
970	L388T	144	1399	0.102931	244	1684	0.144893	0.125851	0.124068	7.55935	0.0050924	4.05096e-14	0.333428	1.17829	1.65865	0.236691	0.730007
971	L388A	340	4243	0.080132	330	3804	0.0867508	0.0832608	0.0831954	-1.29785	0.00315553	0.19434	0.0794948	0.917302	0.99307	-0.124532	-0.0100332
972	L388I	104	1418	0.0733427	128	1055	0.121327	0.0938132	0.0909104	1.13623	0.00568277	0.255859	0.511488	0.839582	1.38888	-0.252256	0.473919
973	L388L	67379	787475	0.0855634	66181	741437	0.0892604	0.0873562	0.0873367	0	0.00032294	1	0.0423221	0.979477	1.0218	-0.0299171	0.031111
974	L388V	502	4674	0.107403	379	4269	0.0887796	0.0985128	0.0980701	3.72445	0.00299549	0.00019574	0.189042	1.22948	1.01629	0.298048	0.0233177
975	L388F	118	1442	0.0818308	281	1615	0.173994	0.13052	0.121898	8.44002	0.00511419	3.1729e-17	0.706121	0.936749	1.99177	-0.0942663	0.994054
976	L388W	320	3465	0.0923521	297	3288	0.0903285	0.0913668	0.0913612	1.16455	0.00344386	0.2442	0.0221484	1.05719	1.03402	0.0802345	0.0482706
977	L388Y	353	3805	0.0927727	420	3516	0.119454	0.105587	0.104747	5.50874	0.00330937	3.61417e-08	0.252695	1.062	1.36743	0.0867897	0.451472
978	L388G	201	2636	0.0762519	165	2301	0.071708	0.0741341	0.0740993	-3.28573	0.00402412	0.00101719	0.0612936	0.872885	0.820869	-0.196137	-0.284777
979	L388P	47	4907	0.00957815	43	4248	0.0101224	0.00983069	0.00982696	-26.2555	0.00295274	6.1848e-152	0.055363	0.109645	0.115875	-3.18909	-3.10936
980	A389H	191	4100	0.0465854	133	4286	0.0310313	0.0386358	0.0378502	-15.7798	0.00308752	4.28554e-56	0.402582	0.533281	0.355227	-0.907033	-1.49319
981	A389K	36	1832	0.0196507	21	1601	0.0131168	0.0166036	0.0162745	-14.6775	0.00482049	8.98529e-49	0.393521	0.224949	0.150153	-2.15233	-2.73549
982	A389R	301	3957	0.0760677	359	4498	0.0798133	0.0780603	0.0780379	-3.01974	0.00307839	0.00252995	0.0479824	0.870777	0.913653	-0.199626	-0.130282
983	A389D	37	2720	0.0136029	59	2683	0.0219903	0.0177679	0.017267	-18.1068	0.00384321	2.81594e-73	0.472052	0.155718	0.251732	-2.68299	-1.99004
984	A389E	131	2045	0.0640587	61	1938	0.0314757	0.0482049	0.0453338	-8.74416	0.00447743	2.24671e-18	0.675926	0.733304	0.360315	-0.447516	-1.47267
985	A389C	181	1568	0.115434	189	1528	0.123691	0.119509	0.119438	6.32756	0.00508139	2.49063e-10	0.0690946	1.32141	1.41594	0.402082	0.50176
986	A389M	202	5396	0.0374351	122	5522	0.0220934	0.0296758	0.0286715	-21.3147	0.00270614	8.2928e-101	0.516977	0.428534	0.252912	-1.22252	-1.98329
987	A389N	157	2208	0.0711051	85	1700	0.05	0.0619243	0.0610063	-5.62537	0.00452094	1.85108e-08	0.340821	0.813967	0.572369	-0.296958	-0.804982
988	A389Q	48	1203	0.0399002	38	1128	0.0336879	0.036894	0.0367627	-8.62545	0.00585039	6.38422e-18	0.168382	0.456753	0.385639	-1.13051	-1.37468
989	A389S	122	1352	0.0902367	139	1441	0.0964608	0.0934479	0.0933961	1.13908	0.0053479	0.254671	0.0666051	1.03297	1.10422	0.046804	0.143033
990	A389T	270	2225	0.121348	200	2045	0.0977995	0.11007	0.109436	5.24762	0.00432844	1.54075e-07	0.213943	1.38912	1.11955	0.474172	0.162917
991	A389A	67379	787475	0.0855634	66181	741437	0.0892604	0.0873562	0.0873367	0	0.00032294	1	0.0423221	0.979477	1.0218	-0.0299171	0.031111
992	A389I	179	2926	0.0611757	120	2650	0.045283	0.0536227	0.0530262	-8.91069	0.00378574	5.07161e-19	0.296379	0.700301	0.518372	-0.513952	-0.94794
993	A389L	85	4081	0.0208282	65	3841	0.0169227	0.0189346	0.0188333	-21.5519	0.00317474	5.08186e-103	0.206265	0.238429	0.19372	-2.06837	-2.36795
994	A389V	374	4579	0.0816772	500	4813	0.103885	0.0930579	0.0923908	1.95064	0.00292299	0.0511002	0.238648	0.934991	1.18922	-0.0969763	0.25001
995	A389F	37	1996	0.0185371	17	1684	0.010095	0.0146739	0.0140366	-15.6108	0.00465589	6.14388e-55	0.575311	0.212201	0.115561	-2.2365	-3.11327
996	A389W	7	879	0.00796359	21	959	0.0218978	0.0152339	0.0134994	-10.9491	0.00658705	6.71093e-28	0.914682	0.0911623	0.250673	-3.45542	-1.99612
997	A389Y	66	5277	0.0125071	71	4375	0.0162286	0.0141939	0.0140745	-25.437	0.00287621	9.82271e-143	0.262187	0.143174	0.185775	-2.80416	-2.42837
998	A389G	124	1120	0.110714	36	813	0.0442804	0.0827729	0.075303	-0.713246	0.00642603	0.475693	0.802604	1.26739	0.506895	0.341859	-0.98024
999	A389P	38	3421	0.0111079	15	3213	0.00466853	0.00798915	0.00729973	-22.8856	0.00346799	6.4601e-116	0.80601	0.127156	0.0534425	-2.97533	-4.22587
1000	L390H	20	2847	0.00702494	2	2600	0.000769231	0.00403892	0.00244416	-21.7726	0.00382671	4.2203e-105	1.54886	0.0804172	0.00880568	-3.63635	-6.82735
1001	L390K	27	3292	0.0082017	22	3993	0.00550964	0.00672615	0.00659479	-24.3637	0.00330943	4.14758e-131	0.400238	0.093888	0.063071	-3.41292	-3.98688
1002	L390R	35	3783	0.00925192	16	3014	0.00530856	0.00750331	0.00723189	-23.3069	0.00342615	3.77185e-120	0.525549	0.10591	0.0607691	-3.23909	-4.04052
1003	L390D	29	7698	0.00376721	41	7832	0.00523493	0.00450741	0.00444715	-36.5395	0.00226738	2.61784e-292	0.325624	0.0431247	0.0599263	-4.53534	-4.06067
1004	L390E	17	3694	0.00460206	12	3880	0.00309278	0.00382889	0.00375432	-25.7365	0.00324549	4.57117e-146	0.394181	0.0526815	0.0354043	-4.24656	-4.81993
1005	L390C	86	2300	0.0373913	57	2119	0.0268995	0.0323603	0.0319291	-12.9397	0.00425016	2.68571e-38	0.324219	0.428033	0.307929	-1.22421	-1.69933
1006	L390M	365	4622	0.0789701	243	4293	0.0566038	0.0681997	0.0672702	-6.39099	0.00299743	1.64814e-10	0.327954	0.904002	0.647965	-0.145603	-0.626012
1007	L390N	6	2184	0.00274725	3	1561	0.00192184	0.0024032	0.0023671	-18.4096	0.00461462	1.10133e-75	0.343461	0.0314489	0.0220001	-4.99085	-5.50635
1008	L390Q	20	2071	0.00965717	17	2131	0.00797748	0.00880533	0.00876527	-18.0289	0.00435693	1.15479e-72	0.190759	0.110549	0.0913212	-3.17724	-3.45291
1009	L390S	1	2113	0.000473261	5	1881	0.00265816	0.00150225	0.00106678	-19.2134	0.00446845	2.8599e-82	1.45441	0.0054176	0.030429	-7.52813	-5.03841
1010	L390T	31	1325	0.0233962	35	1104	0.0317029	0.0271717	0.0268608	-10.502	0.00573078	8.45853e-26	0.305711	0.267826	0.362915	-1.90063	-1.4623
1011	L390A	19	741	0.025641	6	803	0.00747198	0.0161917	0.0135031	-9.9022	0.00718674	4.07199e-23	1.12212	0.293523	0.0855346	-1.76846	-3.54735
1012	L390I	265	2139	0.12389	133	1819	0.0731171	0.100556	0.0972265	2.93672	0.00449467	0.003317	0.504919	1.41821	0.837	0.504074	-0.256701
1013	L390L	67379	787475	0.0855634	66181	741437	0.0892604	0.0873562	0.0873367	0	0.00032294	1	0.0423221	0.979477	1.0218	-0.0299171	0.031111
1014	L390V	370	3017	0.122638	350	3209	0.109068	0.115644	0.115446	7.88436	0.00358784	3.16149e-15	0.117344	1.40389	1.24855	0.489429	0.320249
1015	L390F	28	4577	0.00611754	28	4132	0.00677638	0.00643013	0.00642174	-26.7347	0.00302701	1.86064e-157	0.102461	0.0700299	0.0775718	-3.83589	-3.68832
1016	L390W	2	1931	0.00103573	6	1757	0.00341491	0.0021692	0.00182848	-18.3193	0.00465012	5.80219e-75	1.0968	0.0118564	0.0390918	-6.39819	-4.67699
1017	L390Y	3	1879	0.00159659	5	1495	0.00334448	0.00237107	0.00221558	-17.4808	0.00486164	2.00774e-68	0.737172	0.0182768	0.0382856	-5.77384	-4.70706
1018	L390G	10	2196	0.00455373	6	2115	0.00283688	0.00371144	0.00361023	-19.4468	0.00430121	3.10127e-84	0.462585	0.0521283	0.0324748	-4.26179	-4.94453
1019	L390P	34	3056	0.0111257	9	2668	0.00337331	0.00751223	0.00637906	-21.3872	0.00373326	1.75825e-101	1.03196	0.12736	0.0386156	-2.97302	-4.69467
1020	N391H	134	1621	0.082665	115	1316	0.087386	0.0847804	0.084748	-0.493934	0.00521496	0.621353	0.055685	0.946298	1.00034	-0.0796331	0.000492367
1021	N391K	107	2639	0.0405457	142	2442	0.0581491	0.0490061	0.0482178	-9.67184	0.00396513	3.97161e-22	0.359208	0.464142	0.665655	-1.10736	-0.587154
1022	N391R	212	3986	0.0531862	277	4016	0.0689741	0.0611097	0.0605974	-8.29941	0.00316246	1.0463e-16	0.258354	0.608842	0.789573	-0.715859	-0.340855
1023	N391D	19	3022	0.00628723	39	2804	0.0139087	0.00995537	0.00921343	-20.9155	0.00370064	3.86552e-97	0.765564	0.0719723	0.159218	-3.79641	-2.65092
1024	N391E	46	2965	0.0155143	48	2780	0.0172662	0.0163621	0.0163387	-19.0482	0.00372708	6.79869e-81	0.107068	0.177599	0.197653	-2.49331	-2.33896
1025	N391C	192	2685	0.0715084	250	2666	0.0937734	0.0826014	0.0818483	-1.2298	0.00386635	0.218771	0.269548	0.818584	1.07346	-0.288798	0.102269
1026	N391M	240	3320	0.0722892	247	3391	0.0728399	0.0725674	0.0725669	-4.28276	0.0034531	1.84591e-05	0.00758899	0.827522	0.833826	-0.273131	-0.262182
1027	N391N	67379	787475	0.0855634	66181	741437	0.0892604	0.0873562	0.0873367	0	0.00032294	1	0.0423221	0.979477	1.0218	-0.0299171	0.031111
1028	N391Q	73	1039	0.0702599	67	1129	0.0593446	0.0645756	0.0643461	-3.75458	0.00606741	0.000173629	0.169031	0.804292	0.67934	-0.314209	-0.557794
1029	N391S	57	1438	0.0396384	114	1793	0.0635806	0.0529248	0.0515221	-6.92677	0.00497078	4.30545e-12	0.452382	0.453756	0.727831	-1.14001	-0.458324
1030	N391T	163	2471	0.0659652	185	2807	0.0659067	0.0659341	0.0659341	-5.5045	0.00389176	3.70214e-08	0.000887771	0.755129	0.754459	-0.405205	-0.406486
1031	N391A	268	5013	0.053461	260	4487	0.0579452	0.0555789	0.055534	-10.9466	0.00290295	6.902e-28	0.0806812	0.611989	0.663321	-0.708423	-0.592222
1032	N391I	374	4757	0.078621	228	4104	0.0555556	0.0679382	0.0669406	-6.45873	0.00300649	1.05588e-10	0.339506	0.900005	0.635966	-0.151996	-0.652979
1033	N391L	109	1853	0.0588235	33	1733	0.0190421	0.0395984	0.0341059	-10.1227	0.00471791	4.38353e-24	1.00462	0.673376	0.217983	-0.570517	-2.19772
1034	N391V	364	3810	0.0955381	294	3973	0.0739995	0.0845432	0.0838573	-0.876749	0.00320845	0.380623	0.254764	1.09366	0.847101	0.129165	-0.239395
1035	N391F	169	3200	0.0528125	244	2883	0.0846341	0.0678941	0.0660396	-5.36738	0.003626	7.98885e-08	0.468694	0.604565	0.968839	-0.726031	-0.0456717
1036	N391W	73	1379	0.0529369	78	1792	0.0435268	0.047619	0.0473939	-7.92014	0.00501723	2.37248e-15	0.197613	0.605989	0.498268	-0.722636	-1.00501
1037	N391Y	168	3454	0.0486393	280	3570	0.0784314	0.0637813	0.0620086	-6.98541	0.00337488	2.84022e-12	0.467098	0.556792	0.897834	-0.844789	-0.155479
1038	N391G	95	2789	0.0340624	59	2033	0.0290212	0.031937	0.0318381	-13.6203	0.00406889	3.03511e-42	0.15785	0.389925	0.332216	-1.35873	-1.58981
1039	N391P	12	1959	0.00612557	2	1732	0.00115473	0.00379301	0.00279961	-17.9771	0.00464832	2.94641e-72	1.31053	0.0701218	0.0132187	-3.83399	-6.24128
1040	D392H	3	1146	0.0026178	14	1083	0.0129271	0.00762674	0.00568744	-13.3297	0.00598133	1.55468e-40	1.35173	0.029967	0.147981	-5.06048	-2.75652
1041	D392K	1	1655	0.00060423	19	1475	0.0128814	0.00638978	0.0025549	-16.0401	0.00504774	6.70152e-58	1.92137	0.00691685	0.147458	-7.17567	-2.76163
1042	D392R	6	1326	0.00452489	6	1165	0.00515021	0.00481734	0.00480728	-14.588	0.00565799	3.34756e-48	0.129808	0.0517981	0.0589565	-4.27096	-4.08421
1043	D392D	67379	787475	0.0855634	66181	741437	0.0892604	0.0873562	0.0873367	0	0.00032294	1	0.0423221	0.979477	1.0218	-0.0299171	0.031111
1044	D392E	21	1438	0.0146036	21	1857	0.0113086	0.0127466	0.0126437	-15.1642	0.00492013	6.10651e-52	0.258505	0.167173	0.129453	-2.58058	-2.94949
1045	D392C	10	1403	0.00712758	7	1481	0.00472654	0.00589459	0.00577205	-15.4913	0.00525853	3.96909e-54	0.407331	0.0815922	0.0541065	-3.61543	-4.20805
1046	D392M	14	2095	0.00668258	29	2175	0.0133333	0.0100703	0.00950061	-17.8812	0.0043222	1.6533e-71	0.660436	0.076498	0.152632	-3.70843	-2.71187
1047	D392N	2	1138	0.00175747	1	1379	0.000725163	0.0011919	0.00108207	-15.3085	0.00562852	6.70799e-53	0.866105	0.0201184	0.00830122	-5.63534	-6.91246
1048	D392Q	9	2024	0.00444664	18	2687	0.00669892	0.00573127	0.00561748	-19.8371	0.00411476	1.42409e-87	0.392981	0.0509024	0.0766851	-4.29612	-3.70491
1049	D392S	17	1614	0.0105328	1	1525	0.000655738	0.00573431	0.00273358	-16.1933	0.00504047	5.62138e-59	1.72246	0.120573	0.00750648	-3.05202	-7.05765
1050	D392T	49	1662	0.0294826	10	2036	0.00491159	0.0159546	0.0109909	-15.373	0.00464463	2.48575e-53	1.54006	0.337498	0.0562249	-1.56705	-4.15265
1051	D392A	6	3840	0.0015625	32	3289	0.0097294	0.00533034	0.00363294	-24.5197	0.0033453	9.10448e-133	1.53215	0.0178865	0.111376	-5.80498	-3.16649
1052	D392I	10	1409	0.00709723	1	1024	0.000976562	0.00452117	0.00307998	-14.469	0.005725	1.90219e-47	1.35378	0.0812447	0.0111791	-3.62158	-6.48305
1053	D392L	13	1495	0.00869565	3	1411	0.00212615	0.00550585	0.00438823	-15.6246	0.00523857	4.95276e-55	1.19319	0.0995425	0.0243389	-3.32854	-5.36059
1054	D392V	67	10015	0.00668997	47	9580	0.00490605	0.00581781	0.00574875	-40.3838	0.00201909	0	0.306629	0.0765826	0.0561615	-3.70684	-4.15427
1055	D392F	51	4852	0.0105111	25	4783	0.00522685	0.00788791	0.00743072	-27.6109	0.00287815	8.23442e-168	0.669922	0.120325	0.0598337	-3.05499	-4.0629
1056	D392W	7	3140	0.0022293	52	2823	0.0184201	0.00989435	0.00605833	-21.1766	0.00365791	1.57098e-99	1.63637	0.0255196	0.210862	-5.29225	-2.24563
1057	D392Y	33	2082	0.0158501	7	2187	0.00320073	0.00936988	0.00698388	-18.0413	0.00432266	9.23722e-73	1.35001	0.181443	0.03664	-2.46241	-4.77044
1058	D392G	29	3806	0.00761955	13	3393	0.00383142	0.00583414	0.00551072	-24.4881	0.00332905	1.97918e-132	0.649304	0.0872239	0.0438597	-3.51913	-4.51096
1059	D392P	1	1222	0.000818331	8	1142	0.00700525	0.00380711	0.00230886	-14.3854	0.0058079	6.38829e-47	1.6251	0.00936774	0.0801918	-6.73808	-3.6404
1060	C393H	37	695	0.0532374	33	548	0.060219	0.0563154	0.0562096	-3.87482	0.00801091	0.000106701	0.123973	0.609429	0.68935	-0.71447	-0.536692
1061	C393K	10	1168	0.00856164	61	1158	0.052677	0.0305245	0.021154	-9.70425	0.00585637	2.89181e-22	1.44524	0.0980084	0.603014	-3.35095	-0.729736
1062	C393R	37	2939	0.0125893	29	2757	0.0105187	0.0115871	0.0115406	-20.2444	0.00374272	3.97715e-91	0.178702	0.144115	0.120411	-2.79471	-3.05396
1063	C393D	26	3494	0.00744133	21	2999	0.00700233	0.00723856	0.00723525	-22.8558	0.00350535	1.27966e-115	0.0606465	0.0851837	0.0801584	-3.55328	-3.641
1064	C393E	6	1429	0.00419874	17	1052	0.0161597	0.00927046	0.00743542	-13.7727	0.00566959	3.71854e-43	1.29022	0.0480646	0.184986	-4.37888	-2.43451
1065	C393C	67379	787475	0.0855634	66181	741437	0.0892604	0.0873562	0.0873367	0	0.00032294	1	0.0423221	0.979477	1.0218	-0.0299171	0.031111
1066	C393M	94	1305	0.0720307	87	1071	0.0812325	0.0761785	0.0760418	-1.92834	0.00579659	0.0538131	0.120793	0.824563	0.9299	-0.278299	-0.104853
1067	C393N	97	2129	0.0455613	149	2426	0.061418	0.0540066	0.0534163	-7.9637	0.00418771	1.66974e-15	0.293606	0.521558	0.703075	-0.939101	-0.508249
1068	C393Q	244	2685	0.0908752	189	2693	0.070182	0.0805132	0.0798458	-1.77441	0.00385652	0.075996	0.257017	1.04028	0.8034	0.0569771	-0.31581
1069	C393S	303	3883	0.0780324	325	3874	0.0838926	0.0809591	0.0809061	-1.9907	0.00321349	0.0465136	0.0723843	0.893267	0.960351	-0.162836	-0.0583662
1070	C393T	218	1698	0.128386	162	1933	0.0838076	0.104654	0.102307	3.68644	0.00469236	0.000227411	0.425962	1.46969	0.959377	0.55551	-0.0598298
1071	C393A	32	868	0.0368664	95	1194	0.0795645	0.0615907	0.0575552	-4.14163	0.00622111	3.44844e-05	0.693256	0.422023	0.910805	-1.24461	-0.134785
1072	C393I	30	1260	0.0238095	34	1296	0.0262346	0.0250391	0.0250097	-11.1548	0.00558658	6.78532e-29	0.0968502	0.272557	0.300317	-1.87537	-1.73544
1073	C393L	140	1605	0.0872274	115	1867	0.0615961	0.0734447	0.0723439	-2.90032	0.00479656	0.00372784	0.348987	0.998526	0.705115	-0.00212848	-0.50407
1074	C393V	74	1249	0.0592474	81	1303	0.0621642	0.0607367	0.0607192	-4.75972	0.00559268	1.93864e-06	0.0480243	0.678228	0.711618	-0.560158	-0.490825
1075	C393F	106	2029	0.0522425	128	2293	0.0558221	0.0541416	0.054112	-7.72631	0.0042989	1.10713e-14	0.0661152	0.59804	0.639017	-0.741687	-0.646075
1076	C393W	19	1704	0.0111502	10	1294	0.00772798	0.00967312	0.00951836	-15.0613	0.00515781	2.91144e-51	0.353791	0.127641	0.0884651	-2.96984	-3.49875
1077	C393Y	15	3340	0.00449102	49	2677	0.0183041	0.0106365	0.00839127	-21.068	0.00364152	1.56326e-98	1.29864	0.0514104	0.209534	-4.2818	-2.25475
1078	C393G	218	2919	0.0746831	303	3503	0.0864973	0.0811274	0.0809119	-1.76439	0.00353032	0.0776663	0.145625	0.854926	0.990168	-0.226128	-0.0142552
1079	C393P	6	1722	0.00348432	13	1497	0.00868403	0.00590245	0.00532794	-16.3645	0.00497747	3.42874e-60	0.880941	0.0398864	0.0994095	-4.64796	-3.33047
1080	H394H	67379	787475	0.0855634	66181	741437	0.0892604	0.0873562	0.0873367	0	0.00032294	1	0.0423221	0.979477	1.0218	-0.0299171	0.031111
1081	H394K	12	1554	0.00772201	5	1237	0.00404204	0.00609101	0.00579603	-15.2028	0.0053454	3.38708e-52	0.604165	0.0883968	0.0462708	-3.49986	-4.43376
1082	H394R	46	3450	0.0133333	28	4559	0.0061417	0.00923961	0.00857641	-24.7467	0.00315664	3.36149e-135	0.778349	0.152632	0.0703064	-2.71187	-3.8302
1083	H394D	49	4721	0.0103792	43	4475	0.00960894	0.0100043	0.00999693	-26.2551	0.00294617	6.25488e-152	0.0769884	0.118814	0.109997	-3.07322	-3.18446
1084	H394E	77	9060	0.0084989	48	6904	0.00695249	0.00783012	0.00779186	-35.5537	0.00223679	7.29085e-277	0.197494	0.0972901	0.0795878	-3.36156	-3.65131
1085	H394C	34	2733	0.0124405	9	2647	0.00340008	0.00799257	0.00657153	-20.6101	0.00385073	2.22971e-94	1.13111	0.142412	0.038922	-2.81186	-4.68327
1086	H394M	3	1558	0.00192555	11	1727	0.00636943	0.0042618	0.00361153	-16.8646	0.00492714	8.19084e-64	1.04272	0.0220425	0.0729133	-5.50357	-3.77767
1087	H394N	28	2447	0.0114426	26	3361	0.00773579	0.00929752	0.00912298	-21.061	0.00370632	1.81295e-98	0.398686	0.130988	0.0885546	-2.9325	-3.49729
1088	H394Q	32	5224	0.00612557	55	5533	0.00994036	0.00808776	0.00785768	-29.0988	0.00272411	3.71542e-186	0.471674	0.0701218	0.113791	-3.83399	-3.13554
1089	H394S	40	3782	0.0105764	57	3941	0.0144633	0.0125599	0.012408	-23.2664	0.00321478	9.71269e-120	0.309471	0.121072	0.165567	-3.04606	-2.59451
1090	H394T	7	1819	0.00384827	7	1636	0.00427873	0.0040521	0.00404642	-17.3391	0.00480442	2.38606e-67	0.106231	0.0440526	0.0489803	-4.50463	-4.35166
1091	H394A	44	3855	0.0114137	16	2803	0.00570817	0.00901172	0.00852584	-22.631	0.00346182	2.14466e-113	0.633129	0.130658	0.0653436	-2.93614	-3.93581
1092	H394I	0	1556	0	27	1038	0.0260116	0.0104086	0	-13.8774	0.00554482	8.68578e-44	2.49904	0	0.297764	#NAME?	-1.74776
1093	H394L	2	1382	0.00144718	8	1223	0.00654129	0.00383877	0.00293832	-15.095	0.00553279	1.74652e-51	1.32702	0.0165664	0.0748807	-5.9156	-3.73926
1094	H394V	33	3293	0.0100213	37	3852	0.0096054	0.00979706	0.00979487	-23.208	0.00334192	3.78339e-119	0.0424472	0.114717	0.109957	-3.12385	-3.18499
1095	H394F	22	1663	0.0132291	22	1391	0.015816	0.0144073	0.0143502	-14.2741	0.00511057	3.17236e-46	0.179551	0.151439	0.181051	-2.72319	-2.46553
1096	H394W	14	3211	0.00436001	18	3213	0.00560224	0.00498132	0.00494244	-23.3758	0.00352394	7.53756e-121	0.249377	0.0499107	0.064131	-4.32451	-3.96283
1097	H394Y	22	3758	0.00585418	16	3902	0.00410046	0.00496084	0.0048831	-25.5306	0.00322733	9.02871e-144	0.353512	0.067015	0.0469396	-3.89937	-4.41305
1098	H394G	88	4582	0.0192056	22	4088	0.0053816	0.0126874	0.0105417	-24.6078	0.00303436	1.04306e-133	1.08958	0.219854	0.0616053	-2.18538	-4.0208
1099	H394P	44	5497	0.00800437	68	5218	0.0130318	0.0104526	0.0101487	-28.1732	0.00272967	1.2466e-174	0.480974	0.0916291	0.14918	-3.44805	-2.74487
1100	A395H	17	2335	0.00728051	4	2297	0.0017414	0.00453368	0.00358161	-19.9591	0.00414961	1.24861e-88	1.22177	0.0833428	0.0199345	-3.5848	-5.64859
1101	A395K	26	1941	0.0133952	9	1554	0.00579151	0.0100143	0.00922637	-16.1898	0.00477719	5.94982e-59	0.759279	0.15334	0.0662976	-2.7052	-3.9149
1102	A395R	27	3662	0.00737302	25	3498	0.00714694	0.00726257	0.00726169	-23.993	0.00333822	3.29388e-127	0.0311294	0.0844018	0.0818138	-3.56658	-3.61151
1103	A395D	33	1896	0.0174051	20	2029	0.00985707	0.0135032	0.0129726	-16.3817	0.00450826	2.58328e-60	0.558979	0.199242	0.112838	-2.3274	-3.14768
1104	A395E	25	3295	0.00758725	15	2512	0.00597134	0.00688824	0.00684054	-21.7102	0.00370646	1.643e-104	0.234591	0.0868542	0.0683562	-3.52526	-3.87078
1105	A395C	129	9145	0.0141061	174	7753	0.0224429	0.0179311	0.0174557	-31.9127	0.00217547	1.77737e-223	0.464938	0.161478	0.256913	-2.63059	-1.96065
1106	A395M	1	1830	0.000546448	0	1329	0	0.000316556	0	-17.3241	0.0050242	3.09607e-67	1.72623	0.0062554	0	-7.32068	#NAME?
1107	A395N	3	2084	0.00143954	9	1781	0.00505334	0.00310479	0.00256758	-18.5475	0.00454248	8.54951e-77	1.16395	0.016479	0.0578475	-5.92323	-4.1116
1108	A395Q	41	4446	0.00922177	29	3933	0.00737351	0.00835422	0.00830267	-25.5989	0.00308615	1.57116e-144	0.221237	0.105565	0.0844074	-3.24379	-3.56649
1109	A395S	8	1707	0.00468658	20	1593	0.0125549	0.00848485	0.00754125	-16.0433	0.00491617	6.37085e-58	0.92734	0.0536491	0.143721	-4.2203	-2.79866
1110	A395T	25	2787	0.00897022	16	1705	0.00938416	0.00912734	0.00912514	-18.5639	0.00421404	6.30084e-77	0.0453523	0.102686	0.107424	-3.2837	-3.21861
1111	A395A	67379	787475	0.0855634	66181	741437	0.0892604	0.0873562	0.0873367	0	0.00032294	1	0.0423221	0.979477	1.0218	-0.0299171	0.031111
1112	A395I	13	1234	0.0105348	4	1567	0.00255265	0.00606926	0.00476666	-15.2341	0.00533586	2.09986e-52	1.31518	0.120596	0.0292211	-3.05174	-5.09684
1113	A395L	59	6215	0.00949316	24	6029	0.00398076	0.00677883	0.00618807	-31.5566	0.00255343	1.45577e-218	0.813179	0.108672	0.0455693	-3.20195	-4.45579
1114	A395V	26	3158	0.00823306	3	2632	0.00113982	0.00500864	0.00335123	-22.1856	0.00371176	4.72863e-109	1.4162	0.094247	0.0130479	-3.40741	-6.26004
1115	A395F	19	2006	0.00947159	28	1655	0.0169184	0.012838	0.0123116	-15.9642	0.00466785	2.27094e-57	0.580062	0.108425	0.193672	-3.20523	-2.36831
1116	A395W	17	3422	0.00496786	52	4063	0.0127984	0.00921844	0.00830349	-23.9308	0.00326516	1.46524e-126	0.849447	0.0568689	0.146508	-4.13622	-2.77094
1117	A395Y	35	4393	0.00796722	24	4204	0.00570885	0.00686286	0.00676891	-26.42	0.00304668	8.07026e-154	0.329072	0.0912038	0.0653514	-3.45476	-3.93564
1118	A395G	126	2272	0.0554577	67	1962	0.0341488	0.0455834	0.0442974	-9.61903	0.00434273	6.64578e-22	0.467471	0.634846	0.390915	-0.655521	-1.35507
1119	A395P	23	1733	0.0132718	5	1960	0.00255102	0.00758191	0.00553108	-17.1658	0.00464728	4.78875e-66	1.41399	0.151927	0.0292025	-2.71855	-5.09776
1120	E396H	0	1941	0	10	1542	0.00648508	0.00287109	0	-17.6562	0.00478501	9.11536e-70	2.25875	0	0.0742373	#NAME?	-3.75171
1121	E396K	57	3504	0.0162671	35	3789	0.00923727	0.0126148	0.0121234	-22.5935	0.0033081	5.02501e-113	0.557269	0.186216	0.105743	-2.42495	-3.24137
1122	E396R	13	2610	0.00498084	1	3067	0.000326052	0.00246609	0.00114193	-22.6476	0.00374831	1.47412e-113	1.88752	0.0570176	0.00373244	-4.13245	-8.06567
1123	E396D	78	4704	0.0165816	26	4956	0.00524617	0.010766	0.00918789	-26.6429	0.0028747	2.16578e-156	1.05289	0.189816	0.0600549	-2.39732	-4.05757
1124	E396E	67379	787475	0.0855634	66181	741437	0.0892604	0.0873562	0.0873367	0	0.00032294	1	0.0423221	0.979477	1.0218	-0.0299171	0.031111
1125	E396C	2	2650	0.000754717	1	2597	0.00038506	0.000571755	0.000540919	-22.26	0.00389868	9.03138e-110	0.646531	0.00863954	0.00440793	-6.85483	-7.82568
1126	E396M	28	2342	0.0119556	12	2026	0.005923	0.00915751	0.00863157	-18.2989	0.00427341	8.44107e-75	0.658759	0.13686	0.0678029	-2.86922	-3.88251
1127	E396N	22	1844	0.0119306	28	1801	0.0155469	0.0137174	0.013598	-15.7411	0.00467812	7.90601e-56	0.263631	0.136574	0.177972	-2.87225	-2.49028
1128	E396Q	6	2125	0.00282353	19	1980	0.00959596	0.00609013	0.00509398	-18.4364	0.00440792	6.70666e-76	1.11203	0.032322	0.109849	-4.95134	-3.18641
1129	E396S	8	1475	0.00542373	33	1429	0.0230931	0.0141185	0.0110639	-13.9745	0.00524082	2.23083e-44	1.25151	0.0620875	0.264355	-4.00955	-1.91945
1130	E396T	1	1406	0.000711238	6	1878	0.00319489	0.00213155	0.00167928	-17.2948	0.00492777	5.15162e-67	1.16519	0.00814181	0.0365731	-6.94043	-4.77307
1131	E396A	9	2073	0.00434153	24	2279	0.0105309	0.00758272	0.00690499	-18.6337	0.00428115	1.71407e-77	0.816251	0.0496992	0.120552	-4.33063	-3.05228
1132	E396I	10	1289	0.00775795	16	1409	0.0113556	0.00963677	0.00946581	-14.2948	0.0054369	2.35752e-46	0.373322	0.0888083	0.129992	-3.49316	-2.94351
1133	E396L	1	1654	0.000604595	17	1521	0.0111769	0.00566929	0.00244545	-16.2989	0.00501182	1.00541e-59	1.86483	0.00692103	0.127946	-7.1748	-2.9664
1134	E396V	45	3676	0.0122416	56	3691	0.015172	0.0137098	0.0136312	-22.3744	0.00329155	6.98922e-111	0.21375	0.140134	0.17368	-2.83512	-2.5255
1135	E396F	23	2529	0.0090945	22	2409	0.00913242	0.009113	0.00911298	-19.4667	0.00401934	2.1052e-84	0.00416069	0.104108	0.104542	-3.26384	-3.25784
1136	E396W	13	1159	0.0112166	26	1567	0.0165922	0.0143067	0.0140478	-13.5048	0.00540915	1.46484e-41	0.375744	0.1284	0.189937	-2.96128	-2.3964
1137	E396Y	4	1365	0.0029304	16	1442	0.0110957	0.00712504	0.00580727	-15.0522	0.0053302	3.34051e-51	1.146	0.0335454	0.127017	-4.89774	-2.97691
1138	E396G	4	2679	0.00149309	20	2659	0.00752162	0.00449607	0.00334106	-21.4353	0.00386559	6.26061e-102	1.34085	0.017092	0.0861029	-5.87053	-3.53779
1139	E396P	8	2055	0.00389294	9	1816	0.00495595	0.00439163	0.00435979	-18.278	0.00453903	1.23821e-74	0.242052	0.044564	0.0567326	-4.48798	-4.13968
1140	I397H	24	2343	0.0102433	24	2298	0.0104439	0.0103426	0.0103421	-18.5756	0.00414596	5.06561e-77	0.0193942	0.117259	0.119555	-3.09223	-3.06425
1141	I397K	8	916	0.00873362	1	1045	0.000956938	0.0045895	0.00268815	-12.9795	0.00637674	1.59969e-38	1.69445	0.0999772	0.0109544	-3.32226	-6.51234
1142	I397R	23	1448	0.015884	20	1357	0.0147384	0.0153298	0.0153191	-13.507	0.00533252	1.42152e-41	0.0747294	0.18183	0.168716	-2.45934	-2.56733
1143	I397D	8	1281	0.00624512	12	1150	0.0104348	0.00822707	0.00796169	-13.8156	0.00572753	2.05297e-43	0.509253	0.0714903	0.119451	-3.80611	-3.06551
1144	I397E	17	1399	0.0121515	8	1456	0.00549451	0.00875657	0.0081066	-14.8714	0.0052853	5.05756e-50	0.760233	0.139103	0.0628977	-2.84577	-3.99085
1145	I397C	129	1427	0.0903994	126	1671	0.0754039	0.0823112	0.0819743	-0.993559	0.00507778	0.320438	0.18218	1.03484	0.863178	0.0494037	-0.21227
1146	I397M	149	1926	0.0773624	93	1299	0.0715935	0.0750388	0.0749849	-2.47508	0.00497659	0.0133205	0.0768786	0.885597	0.819559	-0.175277	-0.287081
1147	I397N	37	4071	0.00908868	38	2972	0.012786	0.0106489	0.0104967	-22.7883	0.00336608	5.9838e-115	0.347204	0.104042	0.146366	-3.26477	-2.77234
1148	I397Q	4	1667	0.00239952	11	1290	0.00852713	0.00507271	0.00417215	-15.8445	0.00519319	1.53414e-56	1.20796	0.0274682	0.0976134	-5.18609	-3.35678
1149	I397S	96	1518	0.0632411	42	1381	0.0304127	0.0476026	0.0446211	-7.57637	0.00524706	3.55366e-14	0.689633	0.723945	0.348146	-0.466047	-1.52223
1150	I397T	269	3627	0.074166	137	4050	0.0338272	0.0528852	0.0490165	-10.6795	0.00322776	1.26919e-26	0.762761	0.849006	0.387233	-0.236153	-1.36873
1151	I397A	207	3316	0.0624246	214	3437	0.0622636	0.0623427	0.0623426	-7.26803	0.00344159	3.64756e-13	0.0025826	0.714598	0.712755	-0.484795	-0.488521
1152	I397I	67379	787475	0.0855634	66181	741437	0.0892604	0.0873562	0.0873367	0	0.00032294	1	0.0423221	0.979477	1.0218	-0.0299171	0.031111
1153	I397L	5	1851	0.00270124	37	1750	0.0211429	0.0116634	0.0073423	-16.0827	0.00470648	3.37544e-58	1.58115	0.0309222	0.24203	-5.01521	-2.04674
1154	I397V	306	3012	0.101594	265	3616	0.0732854	0.0861497	0.0850117	-0.347151	0.00347563	0.728478	0.328594	1.16298	0.838926	0.217828	-0.253384
1155	I397F	59	5806	0.0101619	91	6064	0.0150066	0.0126369	0.0124013	-28.8058	0.0025939	1.814e-182	0.383377	0.116327	0.171786	-3.10374	-2.54131
1156	I397W	41	1951	0.0210149	7	1754	0.00399088	0.0129555	0.00957146	-16.0344	0.00464007	7.34719e-58	1.31404	0.240565	0.0456851	-2.0555	-4.45213
1157	I397Y	12	866	0.0138568	1	1357	0.00073692	0.00584795	0.0023111	-13.6089	0.00598932	3.54302e-42	2.2435	0.158624	0.0084358	-2.65631	-6.88926
1158	I397G	2	1375	0.00145455	23	1371	0.0167761	0.00910415	0.004931	-14.5203	0.00538916	9.016e-48	1.68292	0.0166507	0.192042	-5.90827	-2.3805
1159	I397P	50	1935	0.0258398	57	1718	0.0331781	0.029291	0.0290634	-12.4233	0.0046739	1.95356e-35	0.250532	0.295798	0.379803	-1.75732	-1.39668
1160	I398H	5	2091	0.0023912	28	1567	0.0178685	0.00902132	0.00565967	-16.7757	0.00466954	3.67302e-63	1.71564	0.027373	0.204548	-5.1911	-2.28949
1161	I398K	24	2812	0.00853485	12	2814	0.00426439	0.00639886	0.00603216	-21.4996	0.00376554	1.57175e-102	0.667378	0.0977017	0.0488161	-3.35547	-4.3565
1162	I398R	18	1054	0.0170778	3	979	0.00306435	0.0103296	0.00746702	-12.2985	0.00626307	9.22195e-35	1.35664	0.195496	0.0350788	-2.35479	-4.83326
1163	I398D	13	1654	0.00785973	49	1659	0.0295359	0.0187142	0.0152515	-13.9884	0.00490708	1.83542e-44	1.15827	0.0899734	0.338108	-3.47436	-1.56444
1164	I398E	17	1591	0.0106851	26	1912	0.0135983	0.0122752	0.0121879	-15.7341	0.00477187	8.82966e-56	0.237326	0.122316	0.155665	-3.03131	-2.68348
1165	I398C	89	1374	0.0647744	89	1174	0.0758092	0.0698587	0.0696436	-3.12595	0.0055975	0.00177229	0.157959	0.741497	0.867817	-0.431487	-0.204537
1166	I398M	122	1486	0.0820996	136	1859	0.0731576	0.07713	0.0770031	-2.09262	0.00488679	0.0363832	0.115934	0.939826	0.837463	-0.089535	-0.255902
1167	I398N	66	2561	0.0257712	62	2193	0.0282718	0.0269247	0.026896	-14.7483	0.00409752	3.15334e-49	0.0928735	0.295013	0.323638	-1.76115	-1.62755
1168	I398Q	39	3030	0.0128713	48	2763	0.0173724	0.0150181	0.0148505	-19.4901	0.00371152	1.33115e-84	0.299713	0.147343	0.198869	-2.76275	-2.33011
1169	I398S	53	2142	0.0247432	7	1948	0.00359343	0.0146699	0.00987088	-16.4578	0.00441651	7.36751e-61	1.44171	0.283245	0.0411354	-1.81988	-4.60348
1170	I398T	205	3798	0.0539758	204	3147	0.0648236	0.0588913	0.058646	-8.38792	0.00339356	4.94813e-17	0.184202	0.617881	0.742061	-0.694598	-0.43039
1171	I398A	194	4114	0.0471561	154	3685	0.041791	0.0446211	0.0445403	-13.3472	0.0032018	1.22981e-40	0.120235	0.539813	0.478398	-0.889467	-1.06372
1172	I398I	67379	787475	0.0855634	66181	741437	0.0892604	0.0873562	0.0873367	0	0.00032294	1	0.0423221	0.979477	1.0218	-0.0299171	0.031111
1173	I398L	164	1967	0.0833757	156	1899	0.0821485	0.0827729	0.0827706	-1.00808	0.00454662	0.313418	0.0148261	0.954434	0.940385	-0.0672831	-0.0886759
1174	I398V	249	2074	0.120058	167	1719	0.0971495	0.109676	0.109073	4.86089	0.00459165	1.16859e-06	0.208874	1.37435	1.11211	0.458748	0.153297
1175	I398F	65	6369	0.0102057	111	6228	0.0178227	0.0139716	0.0134448	-29.1415	0.00251821	1.06904e-186	0.545182	0.116828	0.204024	-3.09754	-2.29319
1176	I398W	6	2123	0.00282619	10	1591	0.00628536	0.00430802	0.00398019	-17.9217	0.00463394	7.98178e-72	0.802959	0.0323525	0.0719509	-4.94998	-3.79684
1177	I398Y	8	2717	0.00294442	33	2490	0.013253	0.00787402	0.00604529	-20.3065	0.00391412	1.12622e-91	1.30919	0.033706	0.151712	-4.89085	-2.72059
1178	I398G	20	3267	0.00612182	59	2815	0.0209591	0.0129891	0.010821	-20.5309	0.0036222	1.14054e-93	1.14229	0.0700789	0.239927	-3.83488	-2.05933
1179	I398P	17	4803	0.00353945	110	4678	0.0235143	0.0133952	0.00900976	-25.4869	0.00290192	2.75189e-143	1.49119	0.0405175	0.269177	-4.62531	-1.89337
1180	S399H	35	4786	0.007313	57	4491	0.0126921	0.009917	0.00955007	-26.4002	0.00293329	1.36424e-153	0.542407	0.0837147	0.145291	-3.57838	-2.78298
1181	S399K	35	3509	0.00997435	28	3514	0.00796813	0.00897053	0.00891427	-23.2548	0.00337073	1.27146e-119	0.223646	0.11418	0.0912142	-3.13062	-3.4546
1182	S399R	23	4797	0.00479466	43	4584	0.00938045	0.0070355	0.00665552	-27.5379	0.00291673	6.17789e-167	0.651808	0.0548864	0.107382	-4.18741	-3.21918
1183	S399D	18	3201	0.00562324	13	3224	0.00403226	0.0048249	0.00475893	-23.4221	0.00352366	2.54678e-121	0.329744	0.0643714	0.0461588	-3.95744	-4.43725
1184	S399E	19	2798	0.00679056	5	2764	0.00180897	0.00431499	0.00351904	-21.9281	0.00378698	1.40143e-106	1.15448	0.0777342	0.020708	-3.68531	-5.59367
1185	S399C	114	1622	0.0702836	142	1700	0.0835294	0.077062	0.0767763	-2.0993	0.00490364	0.0357903	0.171885	0.804563	0.956193	-0.313722	-0.0646258
1186	S399M	8	2296	0.00348432	49	2499	0.0196078	0.0118874	0.00857347	-18.5019	0.00407898	1.99425e-76	1.35636	0.0398864	0.224459	-4.64796	-2.15548
1187	S399N	26	3425	0.00759124	29	3322	0.00872968	0.00815177	0.00813191	-23.0322	0.00343886	2.21888e-117	0.139656	0.0868999	0.099932	-3.5245	-3.32291
1188	S399Q	45	4483	0.0100379	31	4627	0.00669981	0.00834248	0.00817458	-26.695	0.00295987	5.38426e-157	0.400135	0.114908	0.0766952	-3.12145	-3.70472
1189	S399S	67379	787475	0.0855634	66181	741437	0.0892604	0.0873562	0.0873367	0	0.00032294	1	0.0423221	0.979477	1.0218	-0.0299171	0.031111
1190	S399T	248	2761	0.0898225	289	2578	0.112102	0.100581	0.0999657	3.41545	0.00387193	0.00063677	0.221513	1.02823	1.28328	0.0401672	0.359835
1191	S399A	154	1385	0.111191	137	1293	0.105955	0.108663	0.108632	3.9009	0.00546205	9.58347e-05	0.0481874	1.27285	1.21291	0.348062	0.278472
1192	S399I	203	3983	0.0509666	205	3848	0.0532744	0.0521006	0.0520879	-11.0315	0.00319591	2.69364e-28	0.0442954	0.583434	0.609853	-0.777358	-0.713467
1193	S399L	48	1844	0.0260304	13	1775	0.00732394	0.0168555	0.0139754	-15.0159	0.00469507	5.7763e-51	1.10981	0.29798	0.08384	-1.74671	-3.57622
1194	S399V	187	2260	0.0827434	280	2565	0.109162	0.0967876	0.095875	2.31618	0.00407193	0.0205482	0.272953	0.947195	1.24962	-0.0782665	0.321486
1195	S399F	18	2149	0.00837599	34	1878	0.0181044	0.0129128	0.011999	-16.7259	0.0044508	8.49469e-63	0.753388	0.0958832	0.207248	-3.38258	-2.27057
1196	S399W	7	1475	0.00474576	8	1182	0.00676819	0.00564546	0.00555762	-14.9149	0.00547848	2.63803e-50	0.358239	0.0543266	0.0774781	-4.2022	-3.69007
1197	S399Y	10	3694	0.00270709	27	3951	0.00683371	0.00483976	0.00436857	-25.5431	0.00323048	6.54704e-144	0.852649	0.0309891	0.0782281	-5.01209	-3.67617
1198	S399G	204	1921	0.106195	236	2270	0.103965	0.104987	0.104981	4.03577	0.00436859	5.44232e-05	0.0212401	1.21565	1.19012	0.28173	0.251113
1199	S399P	28	2817	0.00993965	16	2477	0.00645943	0.0083113	0.00812444	-20.3625	0.00388188	3.59428e-92	0.418734	0.113783	0.0739435	-3.13564	-3.75743
1200	R400H	13	2076	0.00626204	38	1814	0.0209482	0.0131105	0.0109969	-16.3954	0.00452846	2.0644e-60	1.12018	0.071684	0.239802	-3.8022	-2.06009
1201	R400K	194	2661	0.0729049	192	2938	0.0653506	0.0689409	0.068838	-4.87299	0.00377907	1.09925e-06	0.109577	0.834571	0.748093	-0.260894	-0.41871
1202	R400R	67379	787475	0.0855634	66181	741437	0.0892604	0.0873562	0.0873367	0	0.00032294	1	0.0423221	0.979477	1.0218	-0.0299171	0.031111
1203	R400D	6	1561	0.00384369	4	1434	0.0027894	0.0033389	0.00329672	-16.2822	0.00516006	1.3193e-59	0.31576	0.0440002	0.0319313	-4.50635	-4.96888
1204	R400E	37	4644	0.00796727	16	4715	0.00339343	0.005663	0.00518284	-27.9769	0.00292003	3.10822e-172	0.807672	0.0912044	0.0388458	-3.45475	-4.6861
1205	R400C	33	2843	0.0116075	5	2287	0.00218627	0.00740741	0.00551456	-20.2744	0.00394334	2.16455e-91	1.27186	0.132875	0.0250271	-2.91186	-5.32037
1206	R400M	13	2338	0.00556031	22	1809	0.0121614	0.00843984	0.00782282	-17.9941	0.00438569	2.16897e-72	0.782137	0.063651	0.139216	-3.97367	-2.8446
1207	R400N	4	1291	0.00309837	43	1419	0.030303	0.0173432	0.0102258	-12.9051	0.00542524	4.21451e-38	1.56861	0.0354683	0.34689	-4.81733	-1.52745
1208	R400Q	5	2886	0.0017325	22	2115	0.0104019	0.00539892	0.00369732	-20.5216	0.00399371	1.38108e-93	1.60576	0.0198326	0.119074	-5.65598	-3.07006
1209	R400S	38	3362	0.0113028	37	3185	0.011617	0.0114556	0.0114546	-21.7405	0.0034912	8.49306e-105	0.0274239	0.129387	0.132984	-2.95023	-2.91068
1210	R400T	0	1376	0	1	1386	0.000721501	0.000362056	0	-16.1907	0.0053731	5.86623e-59	1.99278	0	0.0082593	#NAME?	-6.91977
1211	R400A	18	2059	0.00874211	32	2574	0.012432	0.0107921	0.0106311	-18.4511	0.00414957	5.10893e-76	0.341907	0.100074	0.142314	-3.32086	-2.81285
1212	R400I	21	1830	0.0114754	4	1544	0.00259067	0.0074096	0.00580744	-16.4434	0.00486192	9.34647e-61	1.19908	0.131363	0.0296564	-2.92836	-5.07551
1213	R400L	30	2065	0.0145278	6	1896	0.00316456	0.00908861	0.0070045	-17.4414	0.00448747	4.00436e-68	1.25028	0.166306	0.0362259	-2.58809	-4.78683
1214	R400V	16	2449	0.00653328	1	1737	0.000575705	0.00406116	0.00238442	-19.0827	0.00436495	3.51677e-81	1.46696	0.074789	0.00659032	-3.74103	-7.24544
1215	R400F	12	2213	0.0054225	16	2502	0.00639488	0.00593849	0.0059185	-19.7951	0.00411303	3.28238e-87	0.163742	0.0620735	0.0732047	-4.00988	-3.77192
1216	R400W	36	3568	0.0100897	29	2614	0.0110941	0.0105144	0.0105028	-21.3887	0.00359263	1.70058e-101	0.0955283	0.115501	0.126999	-3.11403	-2.97712
1217	R400Y	10	1716	0.00582751	14	2003	0.00698952	0.00645335	0.00642705	-17.47	0.00463095	2.42342e-68	0.180063	0.0667097	0.0800117	-3.90596	-3.64365
1218	R400G	30	1902	0.0157729	3	2413	0.00124327	0.00764774	0.00380983	-18.5392	0.00429946	9.97401e-77	1.89986	0.180558	0.0142321	-2.46946	-6.1347
1219	R400P	3	1386	0.0021645	17	1576	0.0107868	0.00675219	0.00508742	-15.534	0.00518889	2.04364e-54	1.27696	0.0247779	0.123481	-5.3348	-3.01764
1220	R401H	2	1957	0.00102197	8	2131	0.00375411	0.00244618	0.00201372	-19.2241	0.00441685	2.32479e-82	1.1169	0.0116989	0.0429747	-6.41748	-4.54037
1221	R401K	16	2509	0.00637704	26	1759	0.0147811	0.00984067	0.00901749	-17.9301	0.0043232	6.85958e-72	0.854015	0.0730005	0.169205	-3.77595	-2.56315
1222	R401R	67379	787475	0.0855634	66181	741437	0.0892604	0.0873562	0.0873367	0	0.00032294	1	0.0423221	0.979477	1.0218	-0.0299171	0.031111
1223	R401D	9	2365	0.0038055	1	1448	0.000690608	0.00262261	0.00199042	-18.5279	0.00457331	1.23091e-76	1.18771	0.043563	0.00790565	-4.52075	-6.9829
1224	R401E	29	2076	0.0139692	9	1900	0.00473684	0.00955734	0.00833154	-17.3696	0.00447903	1.40258e-67	0.965993	0.15991	0.0542245	-2.64466	-4.20491
1225	R401C	21	3868	0.00542916	11	4740	0.00232068	0.00371747	0.00339999	-27.4725	0.00304446	3.74524e-166	0.836183	0.0621497	0.0265657	-4.00811	-5.23429
1226	R401M	12	2524	0.00475436	22	2060	0.0106796	0.0074171	0.00683968	-19.1634	0.00417145	7.48566e-82	0.798864	0.054425	0.122254	-4.19959	-3.03205
1227	R401N	18	2444	0.00736498	5	2253	0.00221926	0.00489674	0.00414269	-20.0104	0.00412083	4.47004e-89	1.05084	0.0843097	0.0254048	-3.56816	-5.29876
1228	R401Q	32	2482	0.0128928	31	2742	0.0113056	0.0120597	0.0120338	-19.2671	0.00390804	1.01544e-82	0.131613	0.147589	0.12942	-2.76034	-2.94987
1229	R401S	19	2648	0.00717523	46	2795	0.016458	0.0119419	0.0109894	-19.6973	0.00382867	2.27586e-86	0.777322	0.0821376	0.188401	-3.60581	-2.40812
1230	R401T	1	2011	0.000497265	7	2150	0.00325581	0.00192261	0.00131297	-19.5147	0.00437791	8.23492e-85	1.43479	0.00569238	0.0372706	-7.45675	-4.74582
1231	R401A	8	1823	0.00438837	2	1305	0.00153257	0.00319693	0.00282938	-16.6679	0.00504919	2.24354e-62	0.893295	0.0502354	0.0175439	-4.31515	-5.83289
1232	R401I	2	1256	0.00159236	9	1027	0.00876339	0.00481822	0.00342934	-13.9657	0.00591006	2.5247e-44	1.48832	0.0182283	0.100318	-5.77767	-3.31735
1233	R401L	39	1978	0.0197169	17	2051	0.00828864	0.0138992	0.0126839	-16.5081	0.00444975	3.20784e-61	0.822221	0.225707	0.0948832	-2.14748	-3.3977
1234	R401V	31	2180	0.0142202	10	2237	0.00447027	0.00928232	0.00791365	-18.3718	0.00424966	2.20924e-75	1.05037	0.162784	0.0511729	-2.61897	-4.28848
1235	R401F	13	1824	0.00712719	3	1997	0.00150225	0.00418739	0.00315881	-18.2044	0.00456861	4.76274e-74	1.34331	0.0815877	0.0171969	-3.6155	-5.86171
1236	R401W	33	3274	0.0100794	10	3032	0.00329815	0.0068189	0.00589064	-22.6427	0.00355688	1.64678e-113	0.99448	0.115383	0.0377552	-3.1155	-4.72718
1237	R401Y	17	2263	0.00751215	12	1759	0.00682206	0.00721034	0.00720215	-17.9973	0.00445322	2.04523e-72	0.0957089	0.0859945	0.0780947	-3.53961	-3.67863
1238	R401G	36	6112	0.00589005	39	6368	0.00612437	0.00600962	0.00600847	-32.164	0.00252912	5.61999e-227	0.0389908	0.0674257	0.070108	-3.89056	-3.83428
1239	R401P	5	2362	0.00211685	3	2154	0.00139276	0.00177148	0.00173368	-20.3659	0.00420236	3.35882e-92	0.40875	0.0242324	0.0159434	-5.36692	-5.97089
1240	S402H	16	2881	0.00555363	25	3075	0.00813008	0.00688381	0.00676132	-21.988	0.00365983	3.75098e-107	0.374277	0.0635745	0.0930682	-3.97541	-3.42557
1241	S402K	68	5042	0.0134867	24	4721	0.00508367	0.00942333	0.0084141	-27.2551	0.00285939	1.446e-163	0.891727	0.154388	0.0581947	-2.69537	-4.10297
1242	S402R	11	2155	0.00510441	13	2603	0.00499424	0.00504414	0.00504384	-20.1038	0.00409435	6.83295e-90	0.0218414	0.0584321	0.057171	-4.09709	-4.12857
1243	S402D	25	1681	0.0148721	11	1768	0.00622172	0.0104378	0.00951411	-15.9948	0.00480896	1.38832e-57	0.828755	0.170247	0.0712224	-2.5543	-3.81152
1244	S402E	0	1113	0	8	1391	0.00575126	0.00319489	0	-14.9137	0.00564321	2.68303e-50	1.80014	0	0.0658369	#NAME?	-3.92496
1245	S402C	437	3646	0.119857	484	3750	0.129067	0.124527	0.124442	11.2837	0.00329419	1.58033e-29	0.0739543	1.37205	1.47748	0.456337	0.563134
1246	S402M	8	1744	0.00458716	8	1800	0.00444444	0.00451467	0.00451411	-17.4633	0.00474376	2.72773e-68	0.0316106	0.0525109	0.0508773	-4.25124	-4.29684
1247	S402N	351	4535	0.077398	267	3456	0.0772569	0.077337	0.077337	-3.16463	0.00316601	0.00155282	0.00182411	0.886005	0.88439	-0.174614	-0.177245
1248	S402Q	9	2893	0.00311096	33	3046	0.0108339	0.0070719	0.00589955	-21.9052	0.00366508	2.31633e-106	1.09206	0.0356123	0.12402	-4.81148	-3.01136
1249	S402S	67379	787475	0.0855634	66181	741437	0.0892604	0.0873562	0.0873367	0	0.00032294	1	0.0423221	0.979477	1.0218	-0.0299171	0.031111
1250	S402T	122	1354	0.0901034	101	1621	0.0623072	0.074958	0.0736972	-2.39298	0.0051811	0.0167123	0.370823	1.03145	0.713255	0.0446714	-0.487511
1251	S402A	155	1347	0.115071	185	1988	0.0930584	0.101949	0.101391	2.98088	0.00489547	0.00287424	0.215914	1.31726	1.06527	0.397536	0.0912255
1252	S402I	26	3093	0.00840608	30	2449	0.0122499	0.0101047	0.00992798	-20.3604	0.00379421	3.75747e-92	0.380401	0.0962276	0.140229	-3.37741	-2.83414
1253	S402L	22	2044	0.0107632	42	2707	0.0155153	0.0134708	0.0132566	-18.03	0.00409792	1.13354e-72	0.352771	0.123211	0.17761	-3.0208	-2.49322
1254	S402V	7	2734	0.00256035	16	2085	0.00767386	0.00477277	0.00411676	-20.299	0.00406835	1.31205e-91	1.07139	0.0293093	0.0878456	-5.0925	-3.50889
1255	S402F	36	5203	0.00691909	23	5629	0.00408598	0.00544682	0.00526229	-30.1757	0.00271441	4.93424e-200	0.520138	0.0792054	0.0467738	-3.65826	-4.41815
1256	S402W	16	2160	0.00740741	13	2732	0.00475842	0.00592805	0.00578532	-20.1656	0.00403797	1.9629e-90	0.446857	0.0847954	0.0544714	-3.55987	-4.19836
1257	S402Y	9	1726	0.00521437	5	1672	0.00299043	0.00412007	0.00396631	-17.1814	0.00484454	3.65739e-66	0.539781	0.0596909	0.0342326	-4.06635	-4.86848
1258	S402G	241	2588	0.0931221	499	3006	0.166001	0.132285	0.127046	11.8693	0.00378527	1.70993e-32	0.550928	1.066	1.90028	0.0922135	0.926213
1259	S402P	15	1711	0.0087668	11	1909	0.00576218	0.00718232	0.00702635	-17.0806	0.00469387	2.07072e-65	0.418336	0.100357	0.0659619	-3.31679	-3.92222
1260	L403H	23	2498	0.00920737	14	2219	0.00630915	0.00784397	0.0077074	-19.3353	0.00411228	2.71031e-83	0.369484	0.1054	0.0722232	-3.24605	-3.79139
1261	L403K	5	1276	0.0039185	21	2050	0.0102439	0.0078172	0.00708522	-16.2428	0.00489688	2.5125e-59	0.809166	0.0448565	0.117266	-4.47854	-3.09214
1262	L403R	18	2454	0.00733496	33	2875	0.0114783	0.00957028	0.0093394	-20.1039	0.00386921	6.82806e-90	0.432934	0.0839661	0.131396	-3.57405	-2.92801
1263	L403D	18	2719	0.00662008	3	2828	0.00106082	0.00378583	0.00260279	-22.0383	0.00379205	1.23709e-107	1.46844	0.0757826	0.0121436	-3.72199	-6.36366
1264	L403E	20	1563	0.0127959	5	1661	0.00301023	0.00775434	0.00607133	-16.0045	0.00497371	1.18814e-57	1.26196	0.14648	0.0344593	-2.77123	-4.85896
1265	L403C	220	2330	0.0944206	263	2714	0.0969049	0.0957573	0.0957493	2.10935	0.00398279	0.0349144	0.0259441	1.08087	1.10931	0.112192	0.14966
1266	L403M	164	1898	0.0864067	140	1926	0.0726895	0.0794979	0.0792018	-1.71907	0.00457127	0.0856019	0.172548	0.989131	0.832105	-0.0157662	-0.265163
1267	L403N	35	1578	0.02218	1	1789	0.000558971	0.010692	0.00313752	-15.7514	0.00486715	6.72179e-56	2.02216	0.253903	0.00639876	-1.97765	-7.28799
1268	L403Q	32	1826	0.0175246	23	2067	0.0111272	0.0141279	0.0137693	-16.1767	0.00452678	7.36341e-59	0.45282	0.200611	0.127378	-2.31752	-2.97281
1269	L403S	102	3165	0.0322275	138	3283	0.0420347	0.0372208	0.0368955	-14.2436	0.00351986	4.91381e-46	0.263488	0.36892	0.481188	-1.43862	-1.05533
1270	L403T	360	3160	0.113924	335	3715	0.090175	0.101091	0.100404	4.02295	0.00341408	5.74737e-05	0.234928	1.30413	1.03227	0.38309	0.0458169
1271	L403A	155	2105	0.0736342	151	2156	0.0700371	0.0718141	0.0717916	-3.5889	0.00433061	0.000332081	0.050089	0.842919	0.801742	-0.246534	-0.318791
1272	L403I	115	2294	0.0501308	168	2147	0.0782487	0.0637244	0.0621714	-5.5714	0.00424163	2.52695e-08	0.441243	0.573866	0.895743	-0.801214	-0.158843
1273	L403L	67379	787475	0.0855634	66181	741437	0.0892604	0.0873562	0.0873367	0	0.00032294	1	0.0423221	0.979477	1.0218	-0.0299171	0.031111
1274	L403V	306	3156	0.0969582	295	3024	0.0975529	0.0972492	0.0972487	2.74826	0.00359972	0.00599133	0.00611558	1.10992	1.11673	0.150452	0.159275
1275	L403F	166	1584	0.104798	244	1680	0.145238	0.125613	0.123966	7.72924	0.00494958	1.08193e-14	0.321943	1.19966	1.6626	0.262629	0.733438
1276	L403W	21	1308	0.016055	14	1611	0.00869025	0.0119904	0.0114416	-14.4179	0.00522723	3.99144e-47	0.614224	0.183788	0.0994807	-2.44388	-3.32944
1277	L403Y	46	2141	0.0214853	19	1981	0.00959112	0.015769	0.0145815	-16.272	0.00439942	1.56042e-59	0.754273	0.24595	0.109793	-2.02356	-3.18714
1278	L403G	6	2483	0.00241643	15	2855	0.00525394	0.00393406	0.00366086	-21.5809	0.00386555	2.71393e-103	0.721268	0.0276618	0.0601439	-5.17596	-4.05544
1279	L403P	4	1218	0.00328407	1	1257	0.000795545	0.0020202	0.00159841	-15.0342	0.00567611	4.38038e-51	1.23182	0.037594	0.00910691	-4.73335	-6.77882
1280	L404H	349	4505	0.0774695	303	4124	0.0734724	0.0755592	0.0755327	-3.87154	0.00304713	0.00010815	0.0529006	0.886823	0.841066	-0.173282	-0.249709
1281	L404K	134	1732	0.0773672	105	1697	0.0618739	0.0696996	0.0692672	-3.65844	0.00482627	0.000253755	0.222287	0.885652	0.708294	-0.175188	-0.497579
1282	L404R	129	2731	0.0472354	209	3255	0.0642089	0.0564651	0.0558171	-8.45332	0.00365432	2.83132e-17	0.300601	0.540722	0.735024	-0.88704	-0.444137
1283	L404D	37	4016	0.00921315	24	3963	0.00605602	0.00764507	0.00748002	-25.2057	0.00316243	3.47167e-140	0.412963	0.105466	0.0693256	-3.24514	-3.85047
1284	L404E	20	2031	0.00984737	13	1674	0.00776583	0.00890688	0.00884551	-16.9078	0.00463983	3.94147e-64	0.2337	0.112727	0.0888984	-3.1491	-3.4917
1285	L404C	196	1821	0.107633	172	1957	0.0878896	0.097406	0.0969076	2.18474	0.0046	0.0289082	0.202693	1.23212	1.00611	0.301141	0.0087828
1286	L404M	177	2090	0.084689	191	1602	0.119226	0.099675	0.0982385	2.64734	0.00465326	0.00811289	0.346496	0.969467	1.36483	-0.0447356	0.448716
1287	L404N	57	1793	0.0317903	30	1563	0.0191939	0.0259237	0.0251326	-12.5991	0.00487596	2.13665e-36	0.485904	0.363916	0.219719	-1.45832	-2.18627
1288	L404Q	355	4036	0.0879584	227	3961	0.0573088	0.0727773	0.0711413	-4.60712	0.00316444	4.08278e-06	0.421143	1.00689	0.656035	0.00991084	-0.608154
1289	L404S	150	4196	0.0357483	50	3716	0.0134553	0.0252781	0.0225916	-19.5382	0.00317728	5.20292e-85	0.881911	0.409225	0.154028	-1.28903	-2.69873
1290	L404T	72	1997	0.0360541	110	2496	0.0440705	0.0405075	0.0403082	-11.1132	0.00421558	1.08167e-28	0.1979	0.412725	0.504492	-1.27675	-0.987096
1291	L404A	115	2338	0.0491873	119	2320	0.0512931	0.0502362	0.0502251	-8.96405	0.004141	3.12974e-19	0.0419173	0.563066	0.587172	-0.828623	-0.768145
1292	L404I	120	1402	0.085592	127	1408	0.0901989	0.0879004	0.0878702	0.102058	0.00533145	0.91871	0.0524099	0.979805	1.03254	-0.0294339	0.0461992
1293	L404L	67379	787475	0.0855634	66181	741437	0.0892604	0.0873562	0.0873367	0	0.00032294	1	0.0423221	0.979477	1.0218	-0.0299171	0.031111
1294	L404V	391	4490	0.0870824	412	4406	0.0935089	0.0902653	0.0902081	0.968843	0.0030026	0.332624	0.0711951	0.996866	1.07043	-0.00452884	0.0981928
1295	L404F	13	2190	0.00593607	23	1818	0.0126513	0.00898204	0.00836692	-17.5684	0.00446109	4.30165e-69	0.747625	0.0679525	0.144824	-3.87933	-2.78763
1296	L404W	125	3860	0.0323834	71	2925	0.0242735	0.0288873	0.0285992	-17.0421	0.00343086	4.00133e-65	0.280744	0.370705	0.277868	-1.43165	-1.84753
1297	L404Y	32	2578	0.0124127	19	2179	0.0087196	0.010721	0.0105588	-18.7136	0.00409516	3.83431e-78	0.344475	0.142093	0.0998166	-2.81509	-3.32458
1298	L404G	37	2176	0.0170037	6	1753	0.0034227	0.0109443	0.00831632	-16.9585	0.00450581	1.66441e-64	1.24092	0.194648	0.039181	-2.36106	-4.6737
1299	L404P	4	1511	0.00264725	22	1392	0.0158046	0.00895625	0.00623569	-14.9577	0.00524145	1.38777e-50	1.46907	0.0303041	0.180921	-5.04434	-2.46657
1300	R405H	119	2039	0.0583619	57	1720	0.0331395	0.046821	0.0450471	-8.79553	0.00460862	1.42373e-18	0.538699	0.668092	0.379361	-0.581882	-1.39836
1301	R405K	132	1215	0.108642	41	956	0.042887	0.0796868	0.0721507	-1.26477	0.00606389	0.205952	0.825168	1.24367	0.490944	0.3146	-1.02637
1302	R405R	67379	787475	0.0855634	66181	741437	0.0892604	0.0873562	0.0873367	0	0.00032294	1	0.0423221	0.979477	1.0218	-0.0299171	0.031111
1303	R405D	49	3308	0.0148126	102	3030	0.0336634	0.0238246	0.0219318	-17.9003	0.00354919	1.17216e-71	0.791234	0.169565	0.385357	-2.56009	-1.37573
1304	R405E	20	2106	0.00949668	53	2249	0.023566	0.0167623	0.0151848	-16.4929	0.00428026	4.12597e-61	0.839343	0.108712	0.269769	-3.20142	-1.8902
1305	R405C	325	4413	0.073646	294	5003	0.0587647	0.0657392	0.0653224	-7.41134	0.00291675	1.25027e-13	0.226369	0.843055	0.672703	-0.246302	-0.571959
1306	R405M	128	2355	0.0543524	99	1850	0.0535135	0.0539834	0.0539817	-7.65753	0.00435818	1.89546e-14	0.0155405	0.622193	0.61259	-0.684565	-0.707007
1307	R405N	219	3146	0.0696122	247	3094	0.0798319	0.0746795	0.0745046	-3.54025	0.00358075	0.000399747	0.136848	0.796878	0.913867	-0.32757	-0.129944
1308	R405Q	105	2818	0.0372605	172	2914	0.0590254	0.0483252	0.0470779	-10.454	0.00373361	1.40523e-25	0.450385	0.426535	0.675686	-1.22926	-0.565574
1309	R405S	152	1714	0.0886814	132	1686	0.0782918	0.0835294	0.0833676	-0.789437	0.00484754	0.429857	0.124383	1.01517	0.896237	0.0217222	-0.158049
1310	R405T	81	1437	0.0563674	55	1943	0.0283067	0.0402367	0.0379374	-9.69653	0.00485943	3.1194e-22	0.697391	0.64526	0.324038	-0.632048	-1.62576
1311	R405A	317	2806	0.112972	128	2758	0.0464104	0.0799784	0.0726876	-1.94578	0.00379169	0.0516808	0.832246	1.29324	0.531278	0.370986	-0.912461
1312	R405I	181	2382	0.0759866	210	2365	0.0887949	0.0823678	0.0821186	-1.21545	0.00410418	0.224194	0.155502	0.869847	1.01647	-0.201166	0.0235671
1313	R405L	411	5548	0.0740807	399	5240	0.076145	0.0750834	0.0750763	-4.50074	0.00272685	6.77186e-06	0.0274933	0.848031	0.871662	-0.237811	-0.19816
1314	R405V	180	1956	0.0920245	147	1905	0.0771654	0.0846931	0.0843661	-0.58535	0.00454967	0.558312	0.175447	1.05344	0.883341	0.0751085	-0.178957
1315	R405F	69	2029	0.0340069	93	2624	0.0354421	0.0348162	0.0348089	-12.684	0.00414221	7.24926e-37	0.0412214	0.38929	0.405719	-1.36108	-1.30145
1316	R405W	126	4784	0.0263378	141	5097	0.0276633	0.0270216	0.0270134	-21.215	0.00284396	6.93545e-100	0.0490549	0.301499	0.316673	-1.72978	-1.65894
1317	R405Y	132	2245	0.0587973	107	2160	0.049537	0.0542565	0.0540582	-7.773	0.00425829	7.66484e-15	0.170676	0.673076	0.56707	-0.57116	-0.818403
1318	R405G	68	1997	0.0340511	21	1531	0.0137165	0.0252268	0.0229492	-13.0643	0.00475567	5.26757e-39	0.806071	0.389796	0.157018	-1.35921	-2.671
1319	R405P	31	1799	0.0172318	93	2278	0.0408253	0.0304145	0.027902	-12.8696	0.00442451	6.67284e-38	0.775731	0.197259	0.467343	-2.34184	-1.09745
1320	F406H	227	3549	0.0639617	110	2908	0.0378267	0.0521914	0.0504873	-9.9941	0.00351856	1.61747e-23	0.500753	0.732194	0.433017	-0.449702	-1.20751
1321	F406K	15	3052	0.00491481	17	2873	0.00591716	0.00540084	0.00537765	-22.3356	0.00366928	1.66828e-110	0.185591	0.0562617	0.067736	-4.1517	-3.88393
1322	F406R	3	2124	0.00141243	24	2115	0.0113475	0.00636943	0.0039946	-18.6703	0.00433774	8.63705e-78	1.55981	0.0161686	0.129899	-5.95066	-2.94453
1323	F406D	11	1682	0.00653983	15	1672	0.00897129	0.00775194	0.00765607	-16.3244	0.00487641	6.62087e-60	0.313658	0.074864	0.102698	-3.73958	-3.28352
1324	F406E	44	5662	0.00777111	46	4545	0.010121	0.00881748	0.00874128	-28.0844	0.00279653	1.51873e-173	0.266506	0.0889588	0.115859	-3.49072	-3.10956
1325	F406C	47	4482	0.0104864	54	4108	0.0131451	0.0117579	0.0116831	-24.7997	0.00304836	9.02663e-136	0.226121	0.120042	0.150477	-3.05839	-2.73239
1326	F406M	68	1784	0.0381166	22	1728	0.0127315	0.0256264	0.0222225	-12.9507	0.00476651	2.32691e-38	0.990583	0.436335	0.145742	-1.19649	-2.77851
1327	F406N	10	1423	0.00702741	5	1742	0.00287026	0.00473934	0.004293	-16.4586	0.00501968	7.27516e-61	0.877157	0.0804454	0.032857	-3.63585	-4.92765
1328	F406Q	14	1048	0.0133588	13	1240	0.0104839	0.0118007	0.0117146	-12.7975	0.00590392	1.69262e-37	0.243622	0.152923	0.120013	-2.70912	-3.05874
1329	F406S	27	2433	0.0110974	10	2322	0.00430663	0.00778128	0.00699001	-19.4283	0.00409582	4.44693e-84	0.872707	0.127036	0.0492997	-2.97669	-4.34228
1330	F406T	5	1628	0.00307125	3	1657	0.0018105	0.00243531	0.00235258	-17.2357	0.00492704	1.43352e-66	0.517696	0.0351578	0.0207255	-4.83001	-5.59245
1331	F406A	39	1500	0.026	7	1776	0.00394144	0.0140415	0.00934977	-14.8578	0.00493444	6.19583e-50	1.57095	0.297632	0.0451192	-1.7484	-4.47011
1332	F406I	30	3461	0.00866802	33	3240	0.0101852	0.00940158	0.00937107	-22.5908	0.00345073	5.34149e-113	0.161374	0.0992261	0.116594	-3.33314	-3.10044
1333	F406L	11	1242	0.00885668	21	1399	0.0150107	0.0121166	0.0117124	-13.6915	0.00549536	1.14166e-42	0.507901	0.101386	0.171834	-3.30207	-2.54092
1334	F406V	45	2368	0.0190034	1	1960	0.000510204	0.0106285	0.00369267	-17.872	0.00429319	1.95003e-71	1.73997	0.217539	0.0058405	-2.20065	-7.41969
1335	F406F	67379	787475	0.0855634	66181	741437	0.0892604	0.0873562	0.0873367	0	0.00032294	1	0.0423221	0.979477	1.0218	-0.0299171	0.031111
1336	F406W	177	1737	0.1019	94	1587	0.0592313	0.0815283	0.0786464	-1.18879	0.00490242	0.234521	0.523359	1.16649	0.678043	0.22217	-0.560551
1337	F406Y	286	2460	0.11626	207	2163	0.0957004	0.106641	0.106142	4.63539	0.00416027	3.56273e-06	0.192795	1.33087	1.09552	0.412375	0.131615
1338	F406G	25	3063	0.00816193	7	3333	0.00210021	0.00500313	0.00402332	-23.3186	0.00353164	2.86947e-120	1.21159	0.0934328	0.0240419	-3.41993	-5.3783
1339	F406P	23	1868	0.0123126	9	1471	0.00611829	0.00958371	0.00904787	-15.9127	0.00488744	5.17149e-57	0.646341	0.140947	0.0700384	-2.82677	-3.83571
1340	L407H	13	2123	0.00612341	11	1660	0.00662651	0.00634417	0.00633929	-17.6435	0.00459162	1.14252e-69	0.0793005	0.070097	0.0758562	-3.8345	-3.72059
1341	L407K	16	1482	0.0107962	21	1422	0.0147679	0.012741	0.0125861	-14.2375	0.00524075	5.36004e-46	0.311726	0.123588	0.169054	-3.01638	-2.56444
1342	L407R	12	1163	0.0103181	12	1662	0.00722022	0.00849558	0.00836338	-14.8422	0.00531327	7.81447e-50	0.364652	0.118116	0.0826526	-3.08173	-3.5968
1343	L407D	11	2316	0.00474957	40	2028	0.0197239	0.0117403	0.00923264	-17.6452	0.00428535	1.10781e-69	1.27546	0.0543701	0.225787	-4.20104	-2.14697
1344	L407E	62	2176	0.0284926	22	1586	0.0138714	0.0223285	0.0210349	-14.12	0.00460535	2.85871e-45	0.654824	0.326166	0.158791	-1.61632	-2.6548
1345	L407C	392	5695	0.0688323	287	4735	0.0606125	0.0651007	0.0649709	-8.02872	0.002772	9.84969e-16	0.126264	0.78795	0.693854	-0.343824	-0.527296
1346	L407M	355	3581	0.0991343	406	3614	0.112341	0.105768	0.105561	5.51566	0.00333807	3.47475e-08	0.124864	1.13483	1.28601	0.182475	0.362901
1347	L407N	9	2431	0.00370218	15	3080	0.00487013	0.00435493	0.0043153	-21.8169	0.00380445	1.60443e-105	0.26819	0.0423803	0.0557502	-4.56046	-4.16488
1348	L407Q	2	1948	0.00102669	25	1636	0.0152812	0.00753348	0.00352172	-16.921	0.00471739	3.1529e-64	1.89215	0.011753	0.174929	-6.41083	-2.51515
1349	L407S	2	2043	0.000978953	21	2106	0.00997151	0.0055435	0.00317991	-18.6597	0.00438446	1.05296e-77	1.62218	0.0112064	0.114148	-6.47953	-3.13103
1350	L407T	9	2912	0.00309066	6	3107	0.00193112	0.00249211	0.0024245	-23.3123	0.00364032	3.32635e-120	0.465283	0.03538	0.0221063	-4.82092	-5.4994
1351	L407A	22	2358	0.00932994	35	2169	0.0161365	0.0125911	0.0121305	-17.8099	0.00419795	5.92147e-71	0.540582	0.106803	0.18472	-3.22697	-2.43659
1352	L407I	480	4421	0.108573	260	4703	0.0552839	0.0811048	0.0766707	-2.10896	0.00296424	0.0349483	0.657037	1.24287	0.632856	0.31368	-0.660052
1353	L407L	67379	787475	0.0855634	66181	741437	0.0892604	0.0873562	0.0873367	0	0.00032294	1	0.0423221	0.979477	1.0218	-0.0299171	0.031111
1354	L407V	107	2065	0.051816	168	2573	0.0652934	0.0592928	0.0589068	-6.76148	0.00415049	1.36588e-11	0.227303	0.593157	0.747439	-0.753513	-0.419972
1355	L407F	391	3666	0.106656	440	3556	0.123735	0.115065	0.114748	8.31445	0.00333261	9.21775e-17	0.148427	1.22093	1.41644	0.28798	0.502266
1356	L407W	199	5281	0.0376823	205	5094	0.0402434	0.0389398	0.0389187	-17.4364	0.00277675	4.36934e-68	0.0657725	0.431363	0.460682	-1.21302	-1.11816
1357	L407Y	134	2653	0.0505089	126	2823	0.0446334	0.0474799	0.0473893	-10.4398	0.00381964	1.63117e-25	0.123747	0.578194	0.510935	-0.790374	-0.968787
1358	L407G	10	3693	0.00270783	11	3333	0.00330033	0.0029889	0.00297432	-25.0383	0.00336953	2.34122e-138	0.198235	0.0309975	0.0377801	-5.0117	-4.72623
1359	L407P	3	1116	0.00268817	20	1382	0.0144718	0.00920737	0.00682202	-13.831	0.00565027	1.65699e-43	1.2798	0.0307725	0.165664	-5.02221	-2.59367
1360	Y408H	32	2659	0.0120346	40	2305	0.0173536	0.0145044	0.014264	-18.1713	0.00400917	8.7144e-74	0.366714	0.137765	0.198653	-2.85972	-2.33168
1361	Y408K	13	1597	0.00814026	16	1802	0.00887902	0.00853192	0.00852392	-16.2723	0.00484407	1.55168e-59	0.0865878	0.0931847	0.101642	-3.42376	-3.29844
1362	Y408R	9	2813	0.00319943	10	2831	0.00353232	0.00336641	0.00336229	-22.3418	0.00375931	1.45067e-110	0.0988857	0.0366251	0.0404358	-4.77102	-4.62822
1363	Y408D	30	2460	0.0121951	37	2575	0.0143689	0.0133069	0.0132623	-18.6019	0.00398075	3.10228e-77	0.16336	0.139602	0.164487	-2.84061	-2.60396
1364	Y408E	1	1337	0.000747943	11	1800	0.00611111	0.00382531	0.00249641	-16.5671	0.00504197	1.20479e-61	1.40202	0.00856199	0.0699562	-6.86784	-3.8374
1365	Y408C	71	3607	0.0196839	39	3123	0.012488	0.0163447	0.0159371	-20.6199	0.00344384	1.82053e-94	0.440262	0.22533	0.142955	-2.14989	-2.80637
1366	Y408M	191	4303	0.0443876	198	3692	0.0536295	0.0486554	0.0484389	-12.2364	0.00316277	1.98733e-34	0.189945	0.508122	0.613917	-0.976752	-0.703884
1367	Y408N	16	1740	0.0091954	13	1735	0.0074928	0.00834532	0.00830178	-16.4921	0.00479082	4.17857e-61	0.204019	0.105263	0.0857729	-3.24793	-3.54333
1368	Y408Q	21	2809	0.00747597	34	2618	0.012987	0.0101345	0.00975816	-20.1404	0.00383418	3.26892e-90	0.54379	0.0855803	0.148667	-3.54658	-2.74984
1369	Y408S	27	1264	0.0213608	33	1044	0.0316092	0.0259965	0.0255037	-10.4372	0.00587894	1.67683e-25	0.394223	0.244525	0.361843	-2.03195	-1.46657
1370	Y408T	28	1575	0.0177778	19	1459	0.0130226	0.0154911	0.0153064	-14.0158	0.00512743	1.24768e-44	0.306961	0.203509	0.149075	-2.29684	-2.74589
1371	Y408A	19	1482	0.0128205	12	1694	0.00708383	0.00976071	0.00934303	-15.4843	0.00501125	4.43073e-54	0.587733	0.146761	0.0810913	-2.76846	-3.62431
1372	Y408I	37	1718	0.0215367	68	1737	0.039148	0.0303907	0.0290842	-11.8532	0.0048059	2.07025e-32	0.579495	0.246539	0.448142	-2.02011	-1.15797
1373	Y408L	178	4573	0.0389241	218	3970	0.0549118	0.0463537	0.0456739	-13.4005	0.00305977	6.00615e-41	0.344907	0.445579	0.628597	-1.16625	-0.669793
1374	Y408V	21	2304	0.00911458	22	2062	0.0106693	0.00984883	0.00981838	-18.1328	0.00427443	1.75562e-73	0.157853	0.104338	0.122135	-3.26066	-3.03345
1375	Y408F	242	3853	0.0628082	217	3730	0.0581769	0.0605301	0.0604858	-8.25855	0.00324828	1.47447e-16	0.0765116	0.71899	0.665974	-0.475957	-0.586463
1376	Y408W	66	5225	0.0126316	34	4969	0.00684242	0.00980969	0.00936865	-27.711	0.0027984	5.14342e-169	0.590147	0.144599	0.0783278	-2.78988	-3.67433
1377	Y408Y	67379	787475	0.0855634	66181	741437	0.0892604	0.0873562	0.0873367	0	0.00032294	1	0.0423221	0.979477	1.0218	-0.0299171	0.031111
1378	Y408G	6	1556	0.00385604	15	1878	0.00798722	0.00611532	0.00574243	-16.8578	0.0048192	9.20074e-64	0.675546	0.0441416	0.0914328	-4.50172	-3.45114
1379	Y408P	4	1297	0.00308404	3	901	0.00332963	0.00318471	0.00318244	-13.9747	0.00602315	2.22569e-44	0.0771164	0.0353042	0.0381156	-4.82402	-4.71347
1380	T409H	315	3118	0.101026	306	3335	0.0917541	0.0962343	0.0961229	2.52002	0.00352302	0.0117349	0.09635	1.15649	1.05034	0.209749	0.0708629
1381	T409K	521	5327	0.0978036	662	5326	0.124296	0.111049	0.110256	8.62322	0.0027475	6.50961e-18	0.238565	1.1196	1.42286	0.162978	0.508797
1382	T409R	255	2089	0.122068	191	2185	0.0874142	0.104352	0.102911	3.92866	0.00432606	8.54188e-05	0.332086	1.39736	1.00066	0.482703	0.000957353
1383	T409D	85	1352	0.0628698	113	1185	0.0953586	0.0780449	0.0763742	-1.65977	0.00561	0.0969609	0.416284	0.719695	1.09161	-0.474542	0.126454
1384	T409E	109	2353	0.0463238	170	1943	0.0874936	0.0649441	0.0617606	-5.19696	0.00431254	2.02578e-07	0.633925	0.530287	1.00157	-0.915155	0.00226684
1385	T409C	208	2808	0.0740741	256	2279	0.11233	0.0912129	0.0892645	0.972511	0.00396567	0.330797	0.419413	0.847954	1.28588	-0.237941	0.362761
1386	T409M	354	3593	0.0985249	265	2855	0.0928196	0.0959988	0.0959567	2.45222	0.00352436	0.0141977	0.0594309	1.12785	1.06254	0.173578	0.0875196
1387	T409N	987	8091	0.121987	792	7358	0.107638	0.115153	0.114929	12.1574	0.00228641	5.23946e-34	0.124612	1.39644	1.23217	0.48175	0.301205
1388	T409Q	269	1909	0.140911	117	1625	0.072	0.109225	0.10348	4.59768	0.00475641	4.27222e-06	0.630915	1.61307	0.824212	0.689807	-0.278913
1389	T409S	115	1717	0.0669773	159	1651	0.0963053	0.0813539	0.0800283	-1.23242	0.00487035	0.217792	0.360499	0.766715	1.10244	-0.383238	0.140705
1390	T409T	67379	787475	0.0855634	66181	741437	0.0892604	0.0873562	0.0873367	0	0.00032294	1	0.0423221	0.979477	1.0218	-0.0299171	0.031111
1391	T409A	340	2957	0.114981	279	2567	0.108687	0.112056	0.112012	6.48705	0.00380762	8.75307e-11	0.05617	1.31624	1.24418	0.396418	0.3152
1392	T409I	293	4149	0.0706194	335	4026	0.0832091	0.0768196	0.0765617	-3.36603	0.0031303	0.000762594	0.163887	0.808408	0.952527	-0.306845	-0.0701681
1393	T409L	100	1142	0.0875657	119	1210	0.0983471	0.0931122	0.0929558	0.987845	0.00582683	0.323229	0.11579	1.0024	1.12582	0.00345534	0.170973
1394	T409V	283	3137	0.0902136	261	3402	0.0767196	0.0831931	0.0829208	-1.18984	0.00349888	0.234111	0.162201	1.03271	0.878238	0.0464345	-0.187315
1395	T409F	173	1757	0.0984633	220	2143	0.10266	0.100769	0.100748	2.96231	0.00452788	0.0030534	0.041645	1.12715	1.17519	0.172676	0.23289
1396	T409W	355	5168	0.068692	383	5376	0.0712426	0.0699924	0.0699808	-6.29688	0.00275753	3.0369e-10	0.0364412	0.786343	0.815541	-0.346769	-0.294171
1397	T409Y	243	1907	0.127425	204	2131	0.0957297	0.110698	0.109574	5.24463	0.00445067	1.56594e-07	0.286324	1.45869	1.09585	0.544669	0.132057
1398	T409G	129	1391	0.092739	187	1513	0.123596	0.108815	0.107709	4.09082	0.00524569	4.29848e-05	0.283567	1.06162	1.41485	0.0862666	0.500644
1399	T409P	12	1781	0.00673779	14	1562	0.00896287	0.00777745	0.0076988	-16.2924	0.00488442	1.11805e-59	0.286094	0.07713	0.102601	-3.69656	-3.28488
1400	Q410H	285	3260	0.0874233	266	3277	0.0811718	0.0842894	0.0842315	-0.876357	0.0034995	0.380836	0.0741672	1.00077	0.929205	0.00110795	-0.105931
1401	Q410K	103	2916	0.0353224	55	2652	0.0207391	0.0283764	0.0274096	-15.5757	0.00378665	1.06476e-54	0.513923	0.404349	0.237408	-1.30633	-2.07456
1402	Q410R	55	3600	0.0152778	148	3954	0.0374305	0.0268732	0.0244209	-18.6005	0.00325169	3.1846e-77	0.824341	0.174891	0.428481	-2.51548	-1.2227
1403	Q410D	80	2217	0.0360848	127	2712	0.0468289	0.0419963	0.0416488	-11.2689	0.00402522	1.86819e-29	0.255834	0.413077	0.536069	-1.27552	-0.899511
1404	Q410E	157	2538	0.0618597	119	2431	0.048951	0.0555444	0.055167	-7.93329	0.00400992	2.13419e-15	0.232403	0.708132	0.560361	-0.49791	-0.83557
1405	Q410C	225	4057	0.0554597	129	3737	0.0345197	0.0454196	0.0441824	-13.0934	0.0032029	3.59326e-39	0.461036	0.634868	0.39516	-0.65547	-1.33949
1406	Q410M	341	5801	0.058783	291	5215	0.0558006	0.0573711	0.0573517	-11.1185	0.00269688	1.02027e-28	0.0519842	0.672911	0.638771	-0.571512	-0.64663
1407	Q410N	261	2255	0.115743	210	2315	0.0907127	0.103063	0.102303	3.75411	0.00418401	0.000173961	0.242861	1.32495	1.03842	0.40594	0.0543951
1408	Q410Q	67379	787475	0.0855634	66181	741437	0.0892604	0.0873562	0.0873367	0	0.00032294	1	0.0423221	0.979477	1.0218	-0.0299171	0.031111
1409	Q410S	217	4079	0.0531993	303	3882	0.0780526	0.0653184	0.0641338	-6.94998	0.00317092	3.65332e-12	0.380493	0.608993	0.893498	-0.715502	-0.162464
1410	Q410T	24	2526	0.00950119	64	2215	0.0288939	0.0185615	0.0159753	-16.7687	0.00410257	4.13544e-63	1.04478	0.108764	0.33076	-3.20073	-1.59614
1411	Q410A	151	2883	0.052376	120	2669	0.0449607	0.0488112	0.0486699	-10.1607	0.00379355	2.97066e-24	0.151919	0.599568	0.514682	-0.738004	-0.958247
1412	Q410I	17	2692	0.00631501	14	3022	0.00463269	0.00542527	0.00536067	-21.9279	0.00373637	1.40685e-106	0.310088	0.0722903	0.0530322	-3.79005	-4.23699
1413	Q410L	33	2816	0.0117188	35	2383	0.0146874	0.0130794	0.0129966	-18.9603	0.00391749	3.63107e-80	0.226968	0.134149	0.168132	-2.89809	-2.57233
1414	Q410V	19	3663	0.00518701	3	3464	0.000866051	0.00308685	0.00217312	-25.1882	0.00334559	5.39743e-140	1.39979	0.0593776	0.00991402	-4.07394	-6.65631
1415	Q410F	8	1020	0.00784314	16	1604	0.00997506	0.00914634	0.00908497	-14.1865	0.00551298	1.11072e-45	0.23309	0.0897834	0.114188	-3.47741	-3.13051
1416	Q410W	9	2958	0.0030426	26	2898	0.0089717	0.00597678	0.00519582	-22.0489	0.00369086	9.78684e-108	0.992025	0.0348298	0.102703	-4.84354	-3.28346
1417	Q410Y	31	2397	0.0129328	11	2220	0.00495495	0.00909682	0.00815367	-18.8276	0.00415664	4.48757e-79	0.876997	0.148047	0.0567213	-2.75587	-4.13997
1418	Q410G	145	6972	0.0207975	71	6471	0.010972	0.0160678	0.0152871	-29.2395	0.00243808	6.09789e-188	0.611498	0.238077	0.125601	-2.0705	-2.99308
1419	Q410P	18	2201	0.0081781	0	1862	0	0.00443022	0	-18.7169	0.00443053	3.60205e-78	1.84598	0.0936179	0	-3.41707	#NAME?
1420	L411H	2	1418	0.00141044	7	1205	0.00580913	0.00343119	0.00270254	-15.221	0.00551375	2.56422e-52	1.28197	0.0161458	0.0664993	-5.9527	-3.91052
1421	L411K	0	1957	0	3	1879	0.00159659	0.000782065	0	-18.9878	0.00455947	2.15339e-80	2.04151	0	0.0182768	#NAME?	-5.77384
1422	L411R	8	1824	0.00438596	16	1950	0.00820513	0.0063593	0.006062	-17.6192	0.00459709	1.75558e-69	0.600563	0.0502078	0.0939273	-4.31594	-3.41231
1423	L411D	10	1958	0.00510725	19	1374	0.0138282	0.00870348	0.00770137	-16.0761	0.00489252	3.75205e-58	1.00201	0.0584647	0.158297	-4.09629	-2.65929
1424	L411E	3	2505	0.0011976	17	2385	0.00712788	0.00408998	0.00285846	-20.6172	0.00403867	1.92277e-94	1.44995	0.0137094	0.0815956	-6.18869	-3.61536
1425	L411C	59	1951	0.0302409	89	2052	0.0433723	0.0369723	0.0363814	-11.2828	0.00446557	1.59638e-29	0.355169	0.346179	0.4965	-1.53041	-1.01014
1426	L411M	167	1840	0.0907609	122	1679	0.0726623	0.0821256	0.0816232	-1.09773	0.00476497	0.272324	0.220377	1.03897	0.831793	0.0551603	-0.265703
1427	L411N	8	1876	0.00426439	6	2147	0.0027946	0.00347999	0.00340335	-18.8383	0.00445244	3.66681e-79	0.422356	0.0488161	0.0319908	-4.3565	-4.9662
1428	L411Q	28	4879	0.00573888	31	4968	0.00623994	0.00599167	0.00598643	-28.5805	0.00284686	1.17389e-179	0.0836252	0.0656952	0.0714309	-3.92807	-3.80731
1429	L411S	4	1275	0.00313725	10	1557	0.00642261	0.0049435	0.00465182	-15.5305	0.00530652	2.15824e-54	0.66458	0.0359134	0.0735221	-4.79934	-3.76568
1430	L411T	60	4237	0.014161	43	4320	0.0099537	0.0120369	0.0118521	-24.6605	0.00305425	2.83757e-134	0.349529	0.162106	0.113944	-2.62499	-3.1336
1431	L411A	40	1534	0.0260756	45	1658	0.0271411	0.0266291	0.0266237	-12.1464	0.00499959	5.99269e-34	0.0400132	0.298498	0.310695	-1.74421	-1.68643
1432	L411I	198	1897	0.104375	189	2025	0.0933333	0.0986741	0.0985201	2.50669	0.00451508	0.0121867	0.111904	1.19482	1.06842	0.256799	0.0954823
1433	L411L	67379	787475	0.0855634	66181	741437	0.0892604	0.0873562	0.0873367	0	0.00032294	1	0.0423221	0.979477	1.0218	-0.0299171	0.031111
1434	L411V	169	1685	0.100297	154	1626	0.0947109	0.0975536	0.0975136	2.07563	0.00491289	0.0379277	0.0572587	1.14814	1.08419	0.199293	0.116621
1435	L411F	91	2016	0.0451389	74	1980	0.0373737	0.0412913	0.0411082	-10.306	0.00446973	6.62176e-25	0.188058	0.516722	0.427832	-0.952539	-1.22489
1436	L411W	3	1698	0.00176678	19	1636	0.0116137	0.00659868	0.00445116	-16.5117	0.00489094	3.02437e-61	1.49225	0.0202251	0.132946	-5.62771	-2.91108
1437	L411Y	30	2407	0.0124636	6	2210	0.00271493	0.00779727	0.00600929	-19.1406	0.00415655	1.15887e-81	1.25027	0.142676	0.0310789	-2.80918	-5.00792
1438	L411G	2	1859	0.00107585	26	1364	0.0190616	0.00868756	0.00363151	-15.8143	0.00497453	2.48016e-56	2.07029	0.0123156	0.218205	-6.34336	-2.19624
1439	L411P	20	2431	0.00822707	33	3347	0.00985958	0.00917272	0.00913657	-21.0402	0.00371591	2.81102e-98	0.177974	0.0941784	0.112866	-3.40846	-3.14731
1440	E412H	95	1878	0.0505857	89	1912	0.0465481	0.0485488	0.0485068	-8.45503	0.00458986	2.79021e-17	0.083166	0.579074	0.532854	-0.78818	-0.908187
1441	E412K	45	2086	0.0215724	30	1823	0.0164564	0.0191865	0.0190139	-15.0891	0.00451781	1.91e-51	0.266646	0.246947	0.188383	-2.01772	-2.40826
1442	E412R	68	4473	0.0152023	64	4106	0.0155869	0.0153864	0.0153852	-23.5918	0.00305063	4.67795e-123	0.0249974	0.174027	0.17843	-2.52262	-2.48657
1443	E412D	709	5611	0.126359	306	3405	0.0898678	0.112578	0.111099	8.45025	0.00298469	2.9067e-17	0.324142	1.44648	1.02875	0.532546	0.0408948
1444	E412E	67379	787475	0.0855634	66181	741437	0.0892604	0.0873562	0.0873367	0	0.00032294	1	0.0423221	0.979477	1.0218	-0.0299171	0.031111
1445	E412C	68	2510	0.0270916	90	2834	0.0317572	0.0295659	0.0294734	-14.9516	0.00386517	1.52146e-50	0.157804	0.310128	0.363537	-1.68906	-1.45982
1446	E412M	284	2960	0.0959459	336	3491	0.0962475	0.0961091	0.096109	2.48411	0.00352355	0.0129876	0.00313755	1.09833	1.10178	0.135312	0.139839
1447	E412N	222	3695	0.0600812	220	3760	0.0585106	0.0592891	0.0592839	-8.56791	0.00327585	1.05378e-17	0.0264897	0.687772	0.669794	-0.539997	-0.578211
1448	E412Q	147	2432	0.0604441	118	2114	0.0558184	0.058293	0.0582472	-6.93282	0.00419212	4.12524e-12	0.079353	0.691927	0.638974	-0.531309	-0.646171
1449	E412S	104	1821	0.0571115	117	2122	0.0551367	0.0560487	0.0560401	-6.95643	0.00450052	3.48996e-12	0.0352339	0.653777	0.631171	-0.613129	-0.663898
1450	E412T	58	1703	0.0340575	198	2507	0.0789789	0.0608076	0.0562009	-6.0947	0.00435602	1.09641e-09	0.738745	0.38987	0.904101	-1.35894	-0.145444
1451	E412A	177	5187	0.0341238	283	5296	0.0534366	0.0438806	0.0428016	-15.7353	0.00276294	8.66748e-56	0.440122	0.390628	0.611709	-1.35613	-0.709083
1452	E412I	150	3013	0.0497843	132	2605	0.0506718	0.0501958	0.0501938	-9.85335	0.00377135	6.62995e-23	0.0176811	0.5699	0.580059	-0.81122	-0.785727
1453	E412L	186	2445	0.0760736	219	2939	0.0745151	0.0752229	0.0752189	-3.14824	0.00385401	0.00164255	0.0207181	0.870844	0.853003	-0.199514	-0.229376
1454	E412V	46	2254	0.0204082	102	2290	0.0445415	0.0325704	0.0302431	-13.0711	0.00419139	4.81939e-39	0.740958	0.23362	0.509883	-2.09776	-0.97176
1455	E412F	31	1430	0.0216783	29	1430	0.0202797	0.020979	0.0209674	-12.5683	0.00528131	3.1533e-36	0.0666667	0.24816	0.23215	-2.01066	-2.10687
1456	E412W	37	1642	0.0225335	89	1592	0.0559045	0.038961	0.0352442	-9.74194	0.00496771	1.99698e-22	0.856523	0.25795	0.639961	-1.95484	-0.643945
1457	E412Y	94	2497	0.0376452	53	2880	0.0184028	0.0273387	0.0256582	-15.5762	0.00385316	1.05627e-54	0.703853	0.430939	0.210664	-1.21445	-2.24699
1458	E412G	198	3375	0.0586667	118	2927	0.0403143	0.0501428	0.0492852	-10.4494	0.00356129	1.47441e-25	0.366002	0.67158	0.461493	-0.574369	-1.11562
1459	E412P	18	2241	0.00803213	8	2089	0.00382958	0.00600462	0.00561872	-18.9546	0.00429191	4.04285e-80	0.699885	0.0919469	0.0438387	-3.44306	-4.51165
1460	L413H	297	2720	0.109191	240	2756	0.0870827	0.0980643	0.0974399	2.8008	0.00382321	0.00509762	0.225449	1.24995	0.996869	0.321874	-0.00452349
1461	L413K	301	2426	0.124073	244	2019	0.120852	0.12261	0.122599	8.30768	0.00424348	9.75911e-17	0.0262674	1.42031	1.38344	0.506202	0.468258
1462	L413R	218	1617	0.134818	165	1553	0.106246	0.12082	0.11997	6.66352	0.00502196	2.6734e-11	0.23648	1.54331	1.21624	0.626026	0.282426
1463	L413D	348	3882	0.0896445	158	2542	0.0621558	0.0787671	0.0775515	-2.43346	0.00352959	0.0149554	0.348987	1.0262	0.711521	0.0373052	-0.491021
1464	L413E	132	1725	0.0765217	77	1250	0.0616	0.0702521	0.0698559	-3.30141	0.00518086	0.000961998	0.212403	0.875974	0.705159	-0.19104	-0.50398
1465	L413C	336	3414	0.0984183	310	3176	0.0976071	0.0980273	0.0980265	3.06067	0.00348652	0.00220843	0.0082755	1.12663	1.11735	0.172016	0.160075
1466	L413M	212	1949	0.108774	139	1961	0.0708822	0.0897698	0.0877496	0.533807	0.00452145	0.593475	0.422096	1.24517	0.811416	0.316348	-0.301487
1467	L413N	197	2072	0.0950772	101	1286	0.0785381	0.0887433	0.0883673	0.284351	0.00487799	0.776141	0.18637	1.08839	0.899056	0.12219	-0.153517
1468	L413Q	253	2151	0.11762	74	1222	0.0605565	0.0969463	0.0924752	1.97019	0.00486761	0.0488168	0.588607	1.34644	0.693213	0.429148	-0.528629
1469	L413S	277	3191	0.0868066	211	2639	0.0799545	0.083705	0.0836351	-0.985563	0.00370475	0.324347	0.0818603	0.993709	0.91527	-0.00910464	-0.12773
1470	L413T	209	2015	0.103722	153	1480	0.103378	0.103577	0.103576	3.39161	0.00478248	0.000694832	0.00331838	1.18735	1.18341	0.247741	0.242952
1471	L413A	147	1624	0.0905172	108	1667	0.064787	0.077484	0.0764119	-2.00383	0.00492666	0.0450884	0.332071	1.03619	0.741642	0.0512825	-0.431205
1472	L413I	165	1854	0.0889968	209	1773	0.117879	0.103116	0.102104	3.35671	0.00469485	0.000788747	0.280099	1.01878	1.34941	0.0268428	0.432328
1473	L413L	67379	787475	0.0855634	66181	741437	0.0892604	0.0873562	0.0873367	0	0.00032294	1	0.0423221	0.979477	1.0218	-0.0299171	0.031111
1474	L413V	73	1429	0.0510847	211	1790	0.117877	0.0882262	0.0813247	0.174615	0.00498193	0.861382	0.757059	0.584786	1.34938	-0.77402	0.432301
1475	L413F	489	5011	0.0975853	345	4574	0.0754263	0.087011	0.0862986	-0.11935	0.00289304	0.904998	0.254669	1.1171	0.863434	0.159754	-0.211842
1476	L413W	263	2872	0.0915738	214	2500	0.0856	0.0887937	0.0887436	0.372484	0.00385925	0.709533	0.0672774	1.04828	0.979896	0.068025	-0.0292993
1477	L413Y	246	2259	0.108898	226	2077	0.108811	0.108856	0.108856	5.00531	0.00429541	5.57725e-07	0.000798831	1.24659	1.2456	0.317992	0.31684
1478	L413G	84	1379	0.0609137	220	1843	0.119371	0.0943513	0.0895045	1.40465	0.00497995	0.160125	0.619566	0.697303	1.36648	-0.520143	0.450465
1479	L413P	10	3010	0.00332226	63	3055	0.0206219	0.0120363	0.00833341	-20.7653	0.0036272	8.91476e-96	1.43729	0.0380312	0.236067	-4.71667	-2.08273
1480	Y414H	340	3189	0.106616	390	4158	0.0937951	0.0993603	0.0991591	3.63425	0.00330303	0.000278788	0.129039	1.22048	1.07371	0.287449	0.102602
1481	Y414K	112	1346	0.0832095	164	1297	0.126446	0.104427	0.102177	3.10497	0.00549782	0.00190299	0.414033	0.952531	1.44747	-0.0701617	0.533535
1482	Y414R	382	3371	0.113319	378	3649	0.10359	0.108262	0.108153	6.18628	0.00337939	6.15992e-10	0.0898695	1.29721	1.18583	0.375414	0.245903
1483	Y414D	88	2798	0.031451	213	2907	0.0732714	0.0527607	0.0483942	-9.24337	0.00374274	2.38849e-20	0.792642	0.360032	0.838766	-1.4738	-0.25366
1484	Y414E	157	2080	0.0754808	143	1988	0.0719316	0.0737463	0.073725	-3.07081	0.00443203	0.0021348	0.0481269	0.864057	0.823429	-0.210801	-0.280285
1485	Y414C	407	2907	0.140007	261	2029	0.128635	0.135332	0.135215	11.9088	0.00402862	1.06516e-32	0.0840309	1.60271	1.47253	0.680516	0.558299
1486	Y414M	275	1766	0.155719	205	1918	0.106882	0.130293	0.128012	9.2138	0.00466007	3.14786e-20	0.374824	1.78258	1.22352	0.833964	0.291039
1487	Y414N	179	2421	0.0739364	137	2481	0.0552197	0.0644635	0.0637823	-5.66965	0.00403777	1.43087e-08	0.290346	0.846378	0.632121	-0.240625	-0.661728
1488	Y414Q	212	2140	0.0990654	129	2208	0.0584239	0.0784269	0.075764	-2.08261	0.00428758	0.0372866	0.518209	1.13404	0.668801	0.181471	-0.580351
1489	Y414S	110	1286	0.0855365	111	1190	0.0932773	0.0892569	0.0891732	0.33467	0.00567911	0.737874	0.0867246	0.97917	1.06778	-0.0303691	0.0946161
1490	Y414T	181	1894	0.0955649	160	1803	0.088741	0.0922369	0.0921738	1.04969	0.00464969	0.293863	0.0739829	1.09397	1.01585	0.129571	0.0226905
1491	Y414A	604	4920	0.122764	466	4788	0.0973266	0.110218	0.109481	7.94668	0.00287694	1.91576e-15	0.230793	1.40533	1.11414	0.490908	0.155925
1492	Y414I	173	1541	0.112265	130	1270	0.102362	0.107791	0.107677	3.83279	0.00533151	0.000126696	0.0918683	1.28514	1.17178	0.361923	0.228701
1493	Y414L	339	3967	0.085455	267	3510	0.0760684	0.0810485	0.0809124	-1.92729	0.00327284	0.0539441	0.115815	0.978236	0.870784	-0.0317451	-0.199613
1494	Y414V	173	2076	0.0833333	317	2210	0.143439	0.114326	0.110263	6.242	0.00432065	4.32014e-10	0.52574	0.953949	1.642	-0.0680164	0.715454
1495	Y414F	292	3066	0.0952381	330	2904	0.113636	0.104188	0.103782	4.59532	0.00366272	4.32089e-06	0.176588	1.09023	1.30084	0.124629	0.379443
1496	Y414W	193	2063	0.0935531	325	2606	0.124712	0.110945	0.109836	5.69754	0.00414008	1.21549e-08	0.280853	1.07094	1.42763	0.098875	0.513621
1497	Y414Y	67379	787475	0.0855634	66181	741437	0.0892604	0.0873562	0.0873367	0	0.00032294	1	0.0423221	0.979477	1.0218	-0.0299171	0.031111
1498	Y414G	115	1678	0.068534	169	1788	0.094519	0.0819388	0.0808962	-1.12835	0.00480117	0.259172	0.317127	0.784535	1.082	-0.350091	0.113695
1499	Y414P	74	3372	0.0219454	71	3418	0.0207724	0.0213549	0.0213469	-19.248	0.003429	1.46826e-82	0.0549312	0.251218	0.237789	-1.99299	-2.07224
1500	L415H	286	3396	0.0842167	204	3434	0.0594059	0.0717423	0.0706631	-4.56156	0.00342294	5.07757e-06	0.345832	0.964061	0.680043	-0.0528033	-0.556303
1501	L415K	52	1626	0.0319803	90	1519	0.0592495	0.045151	0.0430753	-8.37775	0.00503777	5.39494e-17	0.603955	0.366091	0.678252	-1.44973	-0.560107
1502	L415R	53	2210	0.0239819	63	1900	0.0331579	0.0282238	0.0278567	-13.4191	0.00440659	4.67522e-41	0.325115	0.27453	0.379571	-1.86496	-1.39756
1503	L415D	59	1810	0.0325967	68	1868	0.0364026	0.0345296	0.0344771	-11.3403	0.00465831	8.28638e-30	0.110221	0.373147	0.416714	-1.42218	-1.26287
1504	L415E	91	1394	0.0652798	119	1324	0.0898792	0.0772627	0.0762835	-1.8622	0.00542024	0.0625755	0.318386	0.747283	1.02888	-0.420274	0.0410764
1505	L415C	96	1461	0.0657084	154	1617	0.0952381	0.0812216	0.0798547	-1.20426	0.00509416	0.228491	0.363569	0.75219	1.09023	-0.410832	0.124629
1506	L415M	181	2038	0.0888126	235	2180	0.107798	0.0986249	0.0981656	2.58798	0.00435424	0.00965393	0.192503	1.01667	1.23401	0.0238536	0.303351
1507	L415N	210	2938	0.0714772	212	2684	0.0789866	0.0750623	0.0749688	-3.25945	0.00377179	0.00111627	0.100042	0.818227	0.90419	-0.289427	-0.145302
1508	L415Q	204	2095	0.0973747	221	2350	0.0940426	0.095613	0.0955986	1.94655	0.00424176	0.0515882	0.0348504	1.11469	1.07654	0.156637	0.106404
1509	L415S	128	1951	0.0656074	143	1821	0.0785283	0.0718452	0.0715557	-3.37039	0.00460215	0.00075061	0.179844	0.751033	0.898943	-0.413052	-0.153698
1510	L415T	186	1530	0.121569	94	1330	0.0706767	0.0979021	0.094468	1.99534	0.00528524	0.0460056	0.519825	1.39164	0.809063	0.476789	-0.305676
1511	L415A	244	2955	0.0825719	370	3383	0.10937	0.096876	0.0959373	2.67804	0.00355474	0.0074054	0.276627	0.945232	1.252	-0.081259	0.32424
1512	L415I	238	2278	0.104478	196	2000	0.098	0.101449	0.101398	3.25936	0.00432387	0.00111664	0.0638507	1.196	1.12184	0.258212	0.165872
1513	L415L	67379	787475	0.0855634	66181	741437	0.0892604	0.0873562	0.0873367	0	0.00032294	1	0.0423221	0.979477	1.0218	-0.0299171	0.031111
1514	L415V	147	1819	0.0808136	123	1563	0.0786948	0.0798344	0.0798274	-1.54764	0.00486019	0.121709	0.0265401	0.925105	0.90085	-0.112311	-0.150641
1515	L415F	166	2216	0.0749097	290	2761	0.105034	0.0916215	0.0903592	1.06388	0.00400913	0.287385	0.328795	0.857521	1.20237	-0.221757	0.26588
1516	L415W	132	2092	0.0630975	133	2103	0.063243	0.0631704	0.0631704	-5.54221	0.00436393	2.98686e-08	0.00230285	0.722302	0.723967	-0.469327	-0.466005
1517	L415Y	183	2593	0.0705746	151	2355	0.0641189	0.067502	0.0674247	-4.93983	0.00401921	7.81889e-07	0.0956376	0.807895	0.733994	-0.307761	-0.446161
1518	L415G	266	2690	0.0988848	138	2024	0.0681818	0.0857022	0.0842956	-0.401601	0.0041187	0.687978	0.358252	1.13197	0.780503	0.178838	-0.357523
1519	L415P	25	1244	0.0200965	2	1068	0.00187266	0.0116782	0.00671457	-12.8853	0.0058732	5.44517e-38	1.5605	0.230052	0.021437	-2.11997	-5.54375
1520	N416H	459	3492	0.131443	460	3932	0.116989	0.123788	0.123578	11.0803	0.00328795	1.5637e-28	0.116768	1.50468	1.33922	0.589459	0.421389
1521	N416K	184	1240	0.148387	130	1606	0.0809465	0.11033	0.105408	4.33568	0.00529883	1.45307e-05	0.611261	1.69864	0.926625	0.764384	-0.109942
1522	N416R	445	3074	0.144763	473	2912	0.162431	0.153358	0.153104	18.026	0.00366147	1.2182e-72	0.115213	1.65715	1.85941	0.728706	0.894848
1523	N416D	266	2128	0.125	189	2116	0.0893195	0.10721	0.105714	4.57311	0.00434146	4.80544e-06	0.332809	1.43092	1.02247	0.516946	0.0320646
1524	N416E	85	1605	0.0529595	93	1565	0.0594249	0.0561514	0.0560584	-6.21798	0.00501848	5.03605e-10	0.115143	0.606248	0.68026	-0.722021	-0.555842
1525	N416C	591	5642	0.10475	428	4900	0.0873469	0.096661	0.0962671	3.3708	0.0027604	0.000749508	0.180043	1.19911	0.999894	0.261969	-0.000152958
1526	N416M	131	1680	0.0779762	105	1595	0.0658307	0.0720611	0.0718042	-3.09721	0.00493836	0.00195349	0.168544	0.892623	0.75359	-0.163876	-0.408149
1527	N416N	67379	787475	0.0855634	66181	741437	0.0892604	0.0873562	0.0873367	0	0.00032294	1	0.0423221	0.979477	1.0218	-0.0299171	0.031111
1528	N416Q	202	2141	0.0943484	197	2155	0.0914153	0.0928771	0.0928655	1.27967	0.00431429	0.200662	0.0315807	1.08004	1.04647	0.111088	0.0655258
1529	N416S	181	1987	0.0910921	129	2106	0.0612536	0.0757391	0.0742678	-2.62913	0.00441863	0.00856024	0.393965	1.04277	0.701193	0.0604158	-0.512116
1530	N416T	461	4097	0.112521	358	3698	0.0968091	0.105067	0.104772	5.52141	0.00320771	3.36285e-08	0.149545	1.28808	1.10821	0.365217	0.148232
1531	N416A	233	2777	0.0839035	264	2604	0.101382	0.092362	0.0919497	1.29808	0.00385628	0.194258	0.189244	0.960476	1.16056	-0.0581792	0.214826
1532	N416I	462	4986	0.0926594	422	4788	0.088137	0.090444	0.0904158	1.0776	0.00286543	0.28121	0.0500026	1.06071	1.00894	0.085028	0.0128378
1533	N416L	277	3491	0.0793469	321	3683	0.0871572	0.0833566	0.083265	-1.19711	0.00334112	0.231265	0.0936977	0.908314	0.997722	-0.138736	-0.00329011
1534	N416V	209	2196	0.095173	114	2101	0.0542599	0.0751687	0.0723093	-2.82597	0.00431268	0.00471376	0.544284	1.08948	0.621134	0.123643	-0.687024
1535	N416F	643	6656	0.0966046	545	6251	0.0871861	0.0920431	0.0919224	1.87751	0.00249631	0.0604487	0.102327	1.10587	0.998052	0.145181	-0.00281278
1536	N416W	429	3832	0.111952	310	4116	0.0753158	0.0929794	0.0911766	1.77059	0.00317585	0.0766289	0.394024	1.28156	0.862169	0.357898	-0.213957
1537	N416Y	213	2056	0.103599	267	2040	0.130882	0.117188	0.116391	6.74985	0.00441955	1.48001e-11	0.232816	1.18594	1.49826	0.246031	0.583289
1538	N416G	320	2801	0.114245	204	2207	0.0924332	0.104633	0.104061	4.32165	0.00399763	1.54866e-05	0.20846	1.30781	1.05812	0.387148	0.0815005
1539	N416P	103	2432	0.042352	94	2631	0.0357279	0.0389097	0.0387694	-12.1986	0.00397147	3.1614e-34	0.170243	0.484819	0.408991	-1.04448	-1.28986
1540	N417H	219	3003	0.0729271	346	3497	0.098942	0.0869231	0.0859348	-0.123422	0.0035096	0.901773	0.299286	0.834824	1.13263	-0.260456	0.179672
1541	N417K	289	2506	0.115323	284	2096	0.135496	0.124511	0.124109	8.90816	0.00417088	5.18859e-19	0.162017	1.32015	1.55108	0.400701	0.63327
1542	N417R	372	3221	0.115492	396	3116	0.127086	0.121193	0.121054	9.51308	0.00355687	1.851e-21	0.095665	1.32208	1.4548	0.402812	0.540823
1543	N417D	149	2188	0.0680987	224	2385	0.0939203	0.0815657	0.0805298	-1.38488	0.00418126	0.16609	0.316574	0.779552	1.07514	-0.359282	0.104527
1544	N417E	137	1666	0.0822329	81	1579	0.0512983	0.0671803	0.0653614	-4.06705	0.00496083	4.76118e-05	0.460472	0.941352	0.587231	-0.0871945	-0.767999
1545	N417C	268	2977	0.0900235	343	2831	0.121159	0.1052	0.104048	4.8053	0.00371329	1.54521e-06	0.295962	1.03053	1.38695	0.0433918	0.471915
1546	N417M	289	3440	0.0840116	218	3274	0.0665852	0.0755139	0.0750079	-3.43002	0.00345257	0.000603527	0.230771	0.961713	0.762227	-0.0563211	-0.391708
1547	N417N	67379	787475	0.0855634	66181	741437	0.0892604	0.0873562	0.0873367	0	0.00032294	1	0.0423221	0.979477	1.0218	-0.0299171	0.031111
1548	N417Q	286	2914	0.0981469	182	2104	0.0865019	0.0932642	0.0930846	1.47963	0.00399289	0.138971	0.12486	1.12353	0.990221	0.168032	-0.0141783
1549	N417S	249	2251	0.110618	257	2461	0.104429	0.107385	0.107341	4.86028	0.00412099	1.1722e-06	0.057628	1.26628	1.19544	0.340598	0.257542
1550	N417T	187	1682	0.111177	180	1753	0.102681	0.106841	0.106757	4.03908	0.00482414	5.36602e-05	0.0795203	1.27269	1.17543	0.347879	0.233189
1551	N417A	130	1407	0.0923952	274	2275	0.12044	0.109723	0.108837	4.79959	0.00466014	1.58993e-06	0.255593	1.05768	1.37872	0.0809073	0.463327
1552	N417I	183	3004	0.0609188	223	2869	0.0777274	0.0691299	0.0686193	-4.93919	0.00369014	7.84478e-07	0.243146	0.697361	0.889776	-0.520023	-0.168486
1553	N417L	332	3988	0.0832497	364	4002	0.0909545	0.0871089	0.0870237	-0.0781019	0.00316704	0.937747	0.0884499	0.952992	1.04119	-0.0694642	0.0582353
1554	N417V	301	3976	0.0757042	298	3582	0.0831937	0.0792538	0.0791658	-2.4891	0.00325518	0.0128068	0.0945005	0.866615	0.952351	-0.206536	-0.070435
1555	N417F	158	1975	0.08	211	2337	0.0902867	0.0855751	0.0854205	-0.413647	0.00430585	0.679133	0.120207	0.915791	1.03355	-0.12691	0.0476033
1556	N417W	291	4454	0.0653345	395	4296	0.091946	0.0784	0.0772677	-2.95943	0.00302634	0.00308213	0.339432	0.747909	1.05254	-0.419064	0.0738767
1557	N417Y	314	3008	0.104388	251	3171	0.0791548	0.0914387	0.090569	1.13416	0.00359958	0.256726	0.27596	1.19497	0.906116	0.256978	-0.142233
1558	N417G	418	3964	0.105449	398	3647	0.109131	0.107213	0.107197	6.11699	0.00324621	9.53592e-10	0.0343405	1.20712	1.24926	0.271564	0.321076
1559	N417P	133	1756	0.0757403	270	2251	0.119947	0.100574	0.0980596	2.95886	0.00446719	0.00308783	0.439541	0.867029	1.37308	-0.205849	0.457411
1560	K418H	180	2202	0.0817439	113	1725	0.0655072	0.0746117	0.0741673	-2.82537	0.00451077	0.00472268	0.217615	0.935753	0.749887	-0.0957996	-0.415256
1561	K418K	67379	787475	0.0855634	66181	741437	0.0892604	0.0873562	0.0873367	0	0.00032294	1	0.0423221	0.979477	1.0218	-0.0299171	0.031111
1562	K418R	486	4872	0.0997537	408	4671	0.0873475	0.0936812	0.0934753	2.18105	0.00289998	0.0291797	0.13243	1.14192	0.9999	0.19146	-0.000144298
1563	K418D	554	6594	0.0840158	364	6562	0.0554709	0.069778	0.0683018	-7.11566	0.00247035	1.11376e-12	0.409081	0.961761	0.634997	-0.0562499	-0.655179
1564	K418E	279	4764	0.0585642	296	4078	0.0725846	0.0650305	0.064658	-7.41856	0.00300944	1.18404e-13	0.215597	0.670407	0.830904	-0.57689	-0.267247
1565	K418C	167	1667	0.10018	60	1665	0.036036	0.0681273	0.0601025	-3.92765	0.0048958	8.57805e-05	0.941531	1.1468	0.412518	0.197612	-1.27747
1566	K418M	162	2325	0.0696774	173	1987	0.0870659	0.0776902	0.0772108	-2.24513	0.00430535	0.0247599	0.223819	0.797624	0.996677	-0.326219	-0.00480184
1567	K418N	176	2011	0.0875186	185	1891	0.0978318	0.0925167	0.0923733	1.14011	0.00452623	0.254239	0.111474	1.00186	1.11992	0.00268034	0.163394
1568	K418Q	107	1639	0.0652837	194	2081	0.0932244	0.080914	0.0796818	-1.39002	0.00463467	0.164524	0.345314	0.747328	1.06718	-0.420187	0.0937977
1569	K418S	302	3420	0.0883041	265	3774	0.0702173	0.0788157	0.0783003	-2.56003	0.00333612	0.0104664	0.229482	1.01085	0.803804	0.0155702	-0.315084
1570	K418T	186	2901	0.0641158	231	2415	0.0956522	0.0784424	0.0768933	-2.29812	0.00387873	0.0215547	0.402032	0.733958	1.09497	-0.44623	0.130888
1571	K418A	331	3378	0.097987	273	3088	0.0884067	0.0934117	0.0932887	1.72065	0.00351928	0.0853138	0.102559	1.12169	1.01203	0.16568	0.0172462
1572	K418I	241	1927	0.125065	164	2418	0.0678246	0.0932106	0.0889705	1.36465	0.00428999	0.172362	0.614096	1.43167	0.776415	0.517695	-0.3651
1573	K418L	374	3519	0.10628	320	3814	0.0839014	0.0946407	0.0939822	2.20354	0.00330578	0.0275565	0.23646	1.21663	0.960452	0.282891	-0.0582149
1574	K418V	111	2022	0.0548961	147	2321	0.0633348	0.0594059	0.0592556	-6.51697	0.00428885	7.17409e-11	0.14205	0.628417	0.725017	-0.670205	-0.463912
1575	K418F	209	2099	0.0995712	112	1921	0.058303	0.0798507	0.0771007	-1.68333	0.00445872	0.0923117	0.516817	1.13983	0.667416	0.188819	-0.583341
1576	K418W	368	3868	0.0951396	402	3838	0.104742	0.0999221	0.0998068	3.89563	0.00322564	9.79456e-05	0.0960993	1.0891	1.19902	0.123136	0.261859
1577	K418Y	212	2332	0.0909091	114	1951	0.0584316	0.0761149	0.0743302	-2.60231	0.00431977	0.00925988	0.426691	1.04067	0.668889	0.0575145	-0.580162
1578	K418G	204	2611	0.078131	206	2495	0.0825651	0.0802977	0.0802671	-1.78356	0.00395757	0.0744956	0.0552213	0.894395	0.945155	-0.161015	-0.0813775
1579	K418P	145	1956	0.0741309	171	1875	0.0912	0.082485	0.0820438	-1.06655	0.00456728	0.286174	0.206936	0.848605	1.044	-0.236835	0.0621237
1580	D419H	269	1620	0.166049	221	1655	0.133535	0.149618	0.148734	12.597	0.0049426	2.19246e-36	0.217317	1.90083	1.52862	0.92663	0.612233
1581	D419K	364	1758	0.207053	375	1478	0.253721	0.228368	0.227196	28.3358	0.00497646	1.25167e-176	0.204353	2.37022	2.90444	1.24502	1.53826
1582	D419R	840	3877	0.216662	785	3959	0.198282	0.207376	0.207173	37.413	0.00320797	2.40014e-306	0.0886311	2.48022	2.26981	1.31047	1.18257
1583	D419D	67379	787475	0.0855634	66181	741437	0.0892604	0.0873562	0.0873367	0	0.00032294	1	0.0423221	0.979477	1.0218	-0.0299171	0.031111
1584	D419E	208	2038	0.102061	202	2013	0.100348	0.10121	0.101206	3.11804	0.00444297	0.0018206	0.0169263	1.16833	1.14872	0.224447	0.200026
1585	D419C	197	1496	0.131684	198	1383	0.143167	0.1372	0.137081	9.45842	0.00526982	3.12624e-21	0.0836917	1.50744	1.63889	0.592103	0.712717
1586	D419M	120	1153	0.104076	162	1259	0.128674	0.116915	0.116264	5.13614	0.00575514	2.80444e-07	0.210385	1.1914	1.47298	0.25266	0.558734
1587	D419N	559	2976	0.187836	382	2640	0.144697	0.167557	0.166153	21.2148	0.00378041	6.96729e-100	0.257459	2.15023	1.6564	1.10449	0.728053
1588	D419Q	397	2220	0.178829	379	2109	0.179706	0.179256	0.179256	21.3558	0.00430328	3.44669e-101	0.00489352	2.04712	2.05716	1.0336	1.04066
1589	D419S	375	1959	0.191424	279	1839	0.151713	0.172196	0.171043	18.4743	0.00459231	3.32486e-76	0.230617	2.19131	1.73672	1.13179	0.796362
1590	D419T	192	1565	0.122684	197	1615	0.121981	0.122327	0.122327	6.97441	0.00501416	3.07162e-12	0.00574102	1.40441	1.39637	0.489962	0.481679
1591	D419A	378	2358	0.160305	295	2075	0.142169	0.151816	0.151545	15.1633	0.00425105	6.19253e-52	0.119465	1.83508	1.62746	0.875841	0.702622
1592	D419I	255	1578	0.161597	229	1420	0.161268	0.161441	0.161441	14.3415	0.00516574	1.20349e-46	0.00204008	1.84986	1.84609	0.887418	0.884475
1593	D419L	266	1864	0.142704	323	1711	0.188778	0.164755	0.163153	16.3555	0.0047323	3.97573e-60	0.279655	1.63359	2.16102	0.708042	1.11171
1594	D419V	289	2461	0.117432	427	2552	0.16732	0.142829	0.140625	13.8743	0.00399822	9.0701e-44	0.349284	1.34429	1.91537	0.426843	0.937626
1595	D419F	352	1906	0.18468	290	1819	0.159428	0.172349	0.171885	18.3297	0.00463689	4.7956e-75	0.146515	2.1141	1.82504	1.08005	0.867925
1596	D419W	1033	3932	0.262716	975	3982	0.244852	0.253728	0.25357	52.0526	0.00319622	0	0.0704076	3.00741	2.80291	1.58852	1.48693
1597	D419Y	580	2771	0.209311	408	2315	0.176242	0.194259	0.193552	26.9068	0.00397306	1.82748e-159	0.170231	2.39606	2.01751	1.26066	1.01257
1598	D419G	391	2393	0.163393	314	2214	0.141825	0.153028	0.152647	15.7469	0.00417047	7.21791e-56	0.140945	1.87043	1.62352	0.903366	0.699127
1599	D419P	381	2118	0.179887	284	1916	0.148225	0.164849	0.164084	17.39	0.00445615	9.81846e-68	0.192062	2.05923	1.69679	1.04211	0.762811
1600	D420H	258	1747	0.147682	244	1737	0.140472	0.144087	0.144042	11.838	0.00479228	2.48323e-32	0.0500368	1.69057	1.60804	0.757509	0.685301
1601	D420K	341	1881	0.181287	303	1386	0.218615	0.197123	0.196274	22.1696	0.00495122	6.74991e-109	0.189365	2.07526	2.50257	1.05329	1.32341
1602	D420R	460	2186	0.21043	360	1702	0.211516	0.210905	0.210905	27.2051	0.00454139	5.64969e-163	0.00514854	2.40887	2.4213	1.26836	1.27578
1603	D420D	67379	787475	0.0855634	66181	741437	0.0892604	0.0873562	0.0873367	0	0.00032294	1	0.0423221	0.979477	1.0218	-0.0299171	0.031111
1604	D420E	401	2869	0.13977	270	2799	0.096463	0.118384	0.116381	8.25288	0.00375962	1.54621e-16	0.365818	1.6	1.10425	0.678072	0.143066
1605	D420C	288	2162	0.13321	262	1718	0.152503	0.141753	0.141432	11.9765	0.00454194	4.72076e-33	0.136103	1.52491	1.74576	0.60872	0.803855
1606	D420M	314	2467	0.12728	322	2131	0.151103	0.138321	0.137814	12.2113	0.00417358	2.70547e-34	0.172227	1.45702	1.72973	0.543025	0.790548
1607	D420N	707	4958	0.142598	658	4474	0.147072	0.14472	0.144703	19.6344	0.0029216	7.85516e-86	0.0309159	1.63237	1.68359	0.70697	0.75154
1608	D420Q	210	1431	0.146751	255	1647	0.154827	0.151072	0.151018	12.4986	0.00509786	7.60098e-36	0.0534608	1.67991	1.77236	0.748384	0.825675
1609	D420S	223	1125	0.198222	193	1183	0.163145	0.180243	0.179391	15.7809	0.00588602	4.21465e-56	0.194614	2.26913	1.86758	1.18214	0.901169
1610	D420T	251	1555	0.161415	190	1763	0.107771	0.132911	0.130234	9.27867	0.00490966	1.71606e-20	0.403607	1.84778	1.23369	0.885791	0.302985
1611	D420A	272	2191	0.124144	236	2109	0.111901	0.11814	0.117981	7.13589	0.00431387	9.61653e-13	0.10363	1.42113	1.28098	0.507035	0.357246
1612	D420I	179	1346	0.132987	275	1704	0.161385	0.148852	0.148173	12.0086	0.00512101	3.20154e-33	0.190782	1.52235	1.84744	0.606299	0.885524
1613	D420L	396	2556	0.15493	183	1742	0.105052	0.134714	0.132357	10.9728	0.00431591	5.16489e-28	0.370251	1.77354	1.20257	0.826631	0.266117
1614	D420V	315	2012	0.156561	354	1952	0.181352	0.168769	0.168314	18.1103	0.00449537	2.64151e-73	0.146898	1.79221	2.07601	0.84174	1.05381
1615	D420F	394	2366	0.166526	259	1941	0.133436	0.151614	0.150704	14.9004	0.00431247	3.27778e-50	0.218248	1.90628	1.5275	0.930764	0.61117
1616	D420W	855	4882	0.175133	747	4871	0.153357	0.164257	0.163896	26.7442	0.00287542	1.44157e-157	0.132576	2.00482	1.75553	1.00347	0.811908
1617	D420Y	641	4387	0.146114	644	3998	0.161081	0.15325	0.153068	21.2718	0.0030977	2.07323e-100	0.0976642	1.67262	1.84395	0.742108	0.8828
1618	D420G	448	2707	0.165497	481	2465	0.195132	0.179621	0.179013	23.4227	0.00393912	2.51074e-121	0.164986	1.89451	2.23375	0.921822	1.15947
1619	D420P	305	2211	0.137947	269	2059	0.130646	0.134426	0.134377	10.8708	0.00432996	1.5885e-27	0.05431	1.57913	1.49555	0.659128	0.58068
1620	Q421H	306	2450	0.124898	147	1936	0.0759298	0.103283	0.100265	3.72945	0.00427059	0.0001919	0.474116	1.42975	0.869197	0.515768	-0.202245
1621	Q421K	365	2670	0.136704	240	2074	0.115718	0.12753	0.127098	9.77823	0.00410844	1.39635e-22	0.164556	1.5649	1.32467	0.646075	0.405637
1622	Q421R	767	4867	0.157592	693	4815	0.143925	0.150795	0.15064	21.9926	0.00288457	3.39299e-107	0.0906309	1.80402	1.64757	0.851212	0.720338
1623	Q421D	322	3923	0.08208	246	3408	0.0721831	0.0774792	0.0773208	-2.98867	0.00330483	0.00280194	0.127737	0.939602	0.826308	-0.0898787	-0.275249
1624	Q421E	196	2769	0.0707837	247	2708	0.0912112	0.0808837	0.0802375	-1.69365	0.00382165	0.0903315	0.252555	0.810288	1.04413	-0.303493	0.0623013
1625	Q421C	361	2602	0.138739	266	2517	0.105681	0.122485	0.121361	8.8811	0.00395543	6.62e-19	0.269895	1.5882	1.20978	0.667396	0.274739
1626	Q421M	296	2874	0.102992	194	2747	0.0706225	0.0871731	0.0856496	-0.0485388	0.00377299	0.961287	0.371328	1.17899	0.808443	0.237555	-0.306782
1627	Q421N	232	2320	0.1	277	2492	0.111156	0.105777	0.10563	4.51716	0.004078	6.26734e-06	0.105464	1.14474	1.27244	0.195018	0.3476
1628	Q421Q	67379	787475	0.0855634	66181	741437	0.0892604	0.0873562	0.0873367	0	0.00032294	1	0.0423221	0.979477	1.0218	-0.0299171	0.031111
1629	Q421S	125	1473	0.0848608	204	1669	0.122229	0.10471	0.103011	3.44098	0.00504336	0.000579601	0.356871	0.971435	1.3992	-0.0418113	0.484603
1630	Q421T	153	1863	0.0821256	250	2303	0.108554	0.0967355	0.0958211	2.14083	0.00438113	0.032288	0.273203	0.940123	1.24266	-0.089078	0.313432
1631	Q421A	237	2010	0.11791	267	2549	0.104747	0.110551	0.110359	5.53627	0.00418952	3.08978e-08	0.119072	1.34977	1.19908	0.43271	0.261926
1632	Q421I	93	1343	0.069248	173	1747	0.0990269	0.0860841	0.0847687	-0.250189	0.00508453	0.802441	0.345928	0.792708	1.1336	-0.335139	0.18091
1633	Q421L	499	5055	0.0987141	412	3996	0.103103	0.100652	0.100628	4.4648	0.00297788	8.0144e-06	0.0436053	1.13002	1.18026	0.176347	0.239106
1634	Q421V	196	2322	0.08441	215	2094	0.102674	0.0930707	0.0926258	1.34284	0.00425546	0.179323	0.196241	0.966274	1.17535	-0.0494963	0.233093
1635	Q421F	275	3113	0.0883392	212	2222	0.0954095	0.091284	0.091218	1.0142	0.00387273	0.310486	0.0774541	1.01125	1.09219	0.016144	0.127223
1636	Q421W	234	2383	0.0981956	224	2353	0.0951976	0.0967061	0.0966945	2.27497	0.00410987	0.0229076	0.0310004	1.12408	1.08976	0.168748	0.124015
1637	Q421Y	222	2180	0.101835	245	2434	0.100657	0.101214	0.101212	3.32795	0.00416396	0.000874876	0.0116339	1.16574	1.15226	0.22125	0.204471
1638	Q421G	440	4936	0.089141	502	4842	0.103676	0.0963387	0.0960645	3.13481	0.0028654	0.00171966	0.150876	1.02043	1.18682	0.0291791	0.247102
1639	Q421P	272	2297	0.118415	229	2473	0.0926001	0.105031	0.104241	4.31545	0.0040958	1.59277e-05	0.245786	1.35555	1.06003	0.438874	0.0841034
1640	K422H	119	2077	0.0572942	164	2599	0.0631012	0.0605218	0.0604525	-6.49162	0.0041337	8.49204e-11	0.0959492	0.655868	0.722344	-0.608522	-0.469243
1641	K422K	67379	787475	0.0855634	66181	741437	0.0892604	0.0873562	0.0873367	0	0.00032294	1	0.0423221	0.979477	1.0218	-0.0299171	0.031111
1642	K422R	367	3930	0.0933842	488	3671	0.132934	0.112485	0.110749	7.73493	0.00324877	1.03462e-14	0.351598	1.06901	1.52174	0.0962687	0.605726
1643	K422D	234	2850	0.0821053	256	2923	0.0875813	0.0848779	0.0848337	-0.665687	0.00372301	0.505611	0.0645161	0.939891	1.00258	-0.0894354	0.00371198
1644	K422E	171	3069	0.0557185	167	2782	0.0600288	0.0577679	0.0577279	-8.00502	0.00369622	1.1945e-15	0.0746138	0.637831	0.687172	-0.648754	-0.541256
1645	K422C	236	2362	0.0999153	155	1996	0.0776553	0.0897201	0.0890222	0.551857	0.00428339	0.581046	0.248105	1.14377	0.88895	0.193796	-0.169826
1646	K422M	166	2169	0.076533	116	2199	0.0527513	0.0645604	0.0634579	-5.32997	0.00427691	9.82271e-08	0.368364	0.876102	0.603864	-0.190829	-0.727705
1647	K422N	216	2665	0.0810507	289	2974	0.0971755	0.0895549	0.0891899	0.583635	0.00376716	0.559466	0.180056	0.927818	1.11241	-0.108086	0.153683
1648	K422Q	148	2350	0.0629787	137	2075	0.0660241	0.0644068	0.0643889	-5.40073	0.00424932	6.63686e-08	0.0472834	0.720942	0.755803	-0.472046	-0.403917
1649	K422S	271	3061	0.0885332	227	2608	0.0870399	0.0878462	0.087843	0.130405	0.00375709	0.896246	0.0169988	1.01347	0.996379	0.0193078	-0.00523358
1650	K422T	180	2023	0.0889768	128	1818	0.070407	0.0801875	0.0796451	-1.57169	0.00456121	0.116023	0.231579	1.01855	0.805976	0.0265186	-0.31119
1651	K422A	295	2994	0.0985304	204	2478	0.0823245	0.0911915	0.09083	1.00292	0.00382412	0.315899	0.177713	1.12792	0.9424	0.173659	-0.085589
1652	K422I	257	3791	0.0677921	356	3233	0.110114	0.0872722	0.0847508	-0.0248843	0.00337676	0.980147	0.484946	0.776043	1.26052	-0.365792	0.334022
1653	K422L	364	3772	0.0965005	354	4034	0.0877541	0.0919805	0.0918768	1.44312	0.00320436	0.148986	0.0950901	1.10468	1.00455	0.143627	0.00655627
1654	K422V	354	5125	0.0690732	477	4882	0.0977059	0.0830419	0.0818062	-1.52376	0.00283139	0.127568	0.344798	0.790707	1.11848	-0.338785	0.161535
1655	K422F	393	5312	0.0739834	272	4489	0.0605926	0.0678502	0.0675177	-6.82179	0.00285937	8.99149e-12	0.197359	0.846917	0.693626	-0.239708	-0.527769
1656	K422W	426	3784	0.112579	254	3452	0.0735805	0.0939746	0.0919068	1.98886	0.0033277	0.0467163	0.414993	1.28874	0.842305	0.365959	-0.247586
1657	K422Y	184	2444	0.0752864	157	1724	0.0910673	0.0818138	0.0814519	-1.26563	0.00437916	0.205644	0.192888	0.861833	1.04248	-0.214521	0.0600228
1658	K422G	107	1690	0.0633136	155	1628	0.0952088	0.0789632	0.0773449	-1.71052	0.0049067	0.0871697	0.403925	0.724775	1.08989	-0.464394	0.124186
1659	K422P	194	1869	0.103799	143	1680	0.085119	0.0949563	0.0944939	1.60151	0.00474556	0.109263	0.19672	1.18823	0.97439	0.248808	-0.0374281
1660	R423H	132	1411	0.0935507	119	1058	0.112476	0.101661	0.101236	2.51495	0.00568773	0.011905	0.186166	1.07091	1.28756	0.0988379	0.36464
1661	R423K	156	1686	0.0925267	140	1491	0.0938967	0.0931697	0.0931671	1.15922	0.00501495	0.246368	0.0147046	1.05919	1.07487	0.0829595	0.104165
1662	R423R	67379	787475	0.0855634	66181	741437	0.0892604	0.0873562	0.0873367	0	0.00032294	1	0.0423221	0.979477	1.0218	-0.0299171	0.031111
1663	R423D	134	2265	0.0591611	118	1791	0.065885	0.0621302	0.0620411	-5.68428	0.00443786	1.31364e-08	0.108222	0.67724	0.754211	-0.56226	-0.40696
1664	R423E	100	1813	0.0551572	101	1422	0.0710267	0.0621329	0.0616418	-5.07695	0.00496821	3.83551e-07	0.255413	0.631406	0.81307	-0.663361	-0.298548
1665	R423C	303	3278	0.0924344	255	2828	0.0901697	0.0913855	0.0913785	1.11277	0.00362093	0.265805	0.0247816	1.05813	1.03221	0.0815199	0.0457331
1666	R423M	135	1708	0.0790398	182	2082	0.0874159	0.0836412	0.0835366	-0.809045	0.00459193	0.418489	0.100144	0.904799	1.00068	-0.144331	0.000986376
1667	R423N	147	2041	0.0720235	201	2579	0.0779372	0.0753247	0.0752671	-2.89249	0.00415959	0.00382202	0.078509	0.824481	0.892177	-0.278442	-0.164598
1668	R423Q	235	2870	0.0818815	245	2805	0.087344	0.0845815	0.0845374	-0.738969	0.00375488	0.459926	0.0645826	0.937329	0.999861	-0.093372	-0.000201027
1669	R423S	153	1744	0.0877294	105	1220	0.0860656	0.0870445	0.0870407	-0.0600432	0.00519132	0.952121	0.0191142	1.00427	0.985226	0.00614961	-0.0214738
1670	R423T	141	1927	0.0731707	146	1865	0.0782842	0.0756857	0.0756425	-2.54247	0.00459025	0.0110071	0.0675617	0.837613	0.896149	-0.255643	-0.158189
1671	R423A	79	1454	0.0543329	154	1901	0.08101	0.0694486	0.0681329	-3.67028	0.00487909	0.000242282	0.384128	0.621969	0.927353	-0.685085	-0.10881
1672	R423I	402	5188	0.0774865	354	4769	0.0742294	0.0759265	0.075909	-4.02773	0.00283777	5.63182e-05	0.0428982	0.887018	0.849732	-0.172965	-0.234919
1673	R423L	173	2283	0.0757775	171	1852	0.0923326	0.0831923	0.0827895	-0.947081	0.00439664	0.343597	0.198998	0.867454	1.05697	-0.205141	0.0799302
1674	R423V	143	2259	0.0633023	170	2019	0.0842001	0.073165	0.0724254	-3.2834	0.0043221	0.00102561	0.285625	0.724646	0.963871	-0.464651	-0.0530882
1675	R423F	179	1847	0.0969139	109	1211	0.0900083	0.0941792	0.094118	1.33484	0.00511144	0.181928	0.0733246	1.10941	1.03036	0.149794	0.0431473
1676	R423W	178	2002	0.0889111	243	2439	0.099631	0.0947985	0.0946472	1.75375	0.00424361	0.0794734	0.113081	1.0178	1.14051	0.0254533	0.189685
1677	R423Y	100	1269	0.0788022	114	1413	0.0806794	0.0797912	0.0797857	-1.38641	0.00545656	0.165621	0.0235264	0.902079	0.923568	-0.148674	-0.11471
1678	R423G	163	1732	0.0941109	143	1620	0.0882716	0.0912888	0.0912421	0.80544	0.00488248	0.420566	0.0639646	1.07732	1.01048	0.107451	0.0150393
1679	R423P	162	2175	0.0744828	137	2382	0.0575147	0.0656133	0.065068	-5.19228	0.00418754	2.07731e-07	0.258607	0.852633	0.658393	-0.230004	-0.60298
1680	S424H	77	1117	0.0689346	72	1387	0.0519106	0.0595048	0.0589123	-4.93304	0.0056459	8.09609e-07	0.286095	0.789121	0.594241	-0.341681	-0.750881
1681	S424K	58	1752	0.033105	48	1943	0.0247041	0.0286874	0.0283822	-12.6244	0.00464725	1.549e-36	0.292845	0.378966	0.282797	-1.39986	-1.82216
1682	S424R	69	1619	0.0426189	84	1416	0.059322	0.0504119	0.0497286	-7.20384	0.00512843	5.85401e-13	0.331333	0.487875	0.679082	-1.03542	-0.558342
1683	S424D	25	2399	0.010421	28	2577	0.0108653	0.0106511	0.0106488	-19.1567	0.00400408	8.504e-82	0.0417175	0.119293	0.12438	-3.06742	-3.00718
1684	S424E	38	1393	0.0272793	17	1387	0.0122567	0.0197842	0.0183011	-12.6146	0.00535666	1.75451e-36	0.759323	0.312276	0.140307	-1.67911	-2.83334
1685	S424C	196	2132	0.0919325	149	1819	0.0819131	0.0873197	0.0871759	-0.00813095	0.00449784	0.993513	0.114743	1.05239	0.937691	0.0736642	-0.0928152
1686	S424M	77	1136	0.0677817	22	933	0.0235798	0.0478492	0.042104	-6.36185	0.00620999	1.99337e-10	0.923774	0.775923	0.269928	-0.366014	-1.88936
1687	S424N	59	1007	0.0585899	96	981	0.0978593	0.0779678	0.0754667	-1.48166	0.00633642	0.138431	0.503662	0.670701	1.12023	-0.576259	0.163799
1688	S424Q	167	1982	0.0842583	99	1956	0.0506135	0.067547	0.0654139	-4.39809	0.00450406	1.09207e-05	0.498095	0.964537	0.579392	-0.0520909	-0.787388
1689	S424S	67379	787475	0.0855634	66181	741437	0.0892604	0.0873562	0.0873367	0	0.00032294	1	0.0423221	0.979477	1.0218	-0.0299171	0.031111
1690	S424T	84	1173	0.0716113	72	1058	0.0680529	0.0699238	0.0699012	-2.91441	0.00598146	0.00356361	0.0508886	0.819762	0.779028	-0.286724	-0.360253
1691	S424A	147	1836	0.0800654	241	2040	0.118137	0.100103	0.0982566	2.80659	0.0045418	0.00500692	0.380326	0.916539	1.35236	-0.125732	0.435482
1692	S424I	158	1900	0.0831579	129	1683	0.0766488	0.0801005	0.0800344	-1.53652	0.0047222	0.12441	0.0812611	0.95194	0.877429	-0.0710569	-0.188646
1693	S424L	228	1914	0.119122	159	1785	0.0890756	0.104623	0.103533	3.71393	0.00464915	0.000204064	0.28719	1.36364	1.01968	0.447461	0.0281207
1694	S424V	185	2129	0.0868953	181	1891	0.0957166	0.0910448	0.0909387	0.827138	0.0044594	0.408159	0.0968896	0.994723	1.0957	-0.00763268	0.131858
1695	S424F	175	2347	0.0745633	138	2533	0.0544809	0.0641393	0.0633559	-5.73708	0.00404682	9.63255e-09	0.313106	0.853554	0.623663	-0.228445	-0.681161
1696	S424W	44	1701	0.0258671	33	1325	0.0249057	0.0254461	0.0254416	-12.0571	0.00513473	1.77862e-33	0.0377848	0.296111	0.285105	-1.75579	-1.81044
1697	S424Y	120	1677	0.0715564	89	1045	0.0851675	0.0767818	0.0765035	-1.95236	0.00541624	0.0508951	0.17727	0.819133	0.974945	-0.28783	-0.0366077
1698	S424G	113	1351	0.0836417	148	1423	0.104006	0.094088	0.0935337	1.25447	0.00536618	0.209671	0.216434	0.957479	1.19059	-0.0626869	0.25168
1699	S424P	230	4703	0.048905	227	4986	0.0455275	0.0471669	0.0471367	-13.9846	0.00287382	1.9349e-44	0.071607	0.559834	0.521171	-0.836929	-0.940173
1700	I425H	49	1606	0.0305106	30	1549	0.0193673	0.0250396	0.0244086	-12.3922	0.00502871	2.88175e-35	0.445025	0.349266	0.221705	-1.5176	-2.17328
1701	I425K	2	1035	0.00193237	23	1107	0.0207769	0.0116713	0.00659433	-12.4038	0.00610174	2.49148e-35	1.6146	0.0221205	0.237841	-5.49847	-2.07193
1702	I425R	47	2150	0.0218605	0	1792	0	0.0119229	0	-16.7688	0.00449844	4.12869e-63	1.83349	0.250245	0	-1.99859	#NAME?
1703	I425D	28	2624	0.0106707	8	3072	0.00260417	0.00632022	0.00498705	-21.6539	0.00374234	5.58941e-104	1.27631	0.122152	0.0298109	-3.03325	-5.06802
1704	I425E	24	2875	0.00834783	19	2839	0.0066925	0.00752538	0.00747968	-21.365	0.00373653	2.82907e-101	0.219966	0.0955608	0.0766116	-3.38744	-3.70629
1705	I425C	167	2028	0.0823471	150	1879	0.0798297	0.0811364	0.0811267	-1.37525	0.00452267	0.169053	0.0310273	0.942659	0.913841	-0.0851916	-0.129985
1706	I425M	67	1515	0.0442244	39	1190	0.0327731	0.0391867	0.0387622	-8.86882	0.00543133	7.39219e-19	0.292225	0.506254	0.375166	-0.982067	-1.4144
1707	I425N	28	1307	0.0214231	32	1133	0.0282436	0.0245902	0.0243569	-10.9774	0.00571773	4.90648e-28	0.277367	0.245239	0.323315	-2.02774	-1.62899
1708	I425Q	7	1562	0.00448143	28	1200	0.0233333	0.012672	0.00917781	-13.8981	0.00537372	6.50758e-44	1.48768	0.0513007	0.267106	-4.28488	-1.90452
1709	I425S	27	1189	0.0227082	16	1198	0.0133556	0.0180142	0.0173975	-11.9958	0.00578052	3.73776e-33	0.519176	0.259949	0.152887	-1.9437	-2.70947
1710	I425T	62	2030	0.0305419	43	1939	0.0221764	0.026455	0.0261208	-13.5819	0.004484	5.12747e-42	0.316216	0.349625	0.253862	-1.51612	-1.97789
1711	I425A	48	1509	0.0318091	18	1305	0.0137931	0.0234542	0.0215904	-12.0017	0.0053244	3.47903e-33	0.768139	0.364132	0.157895	-1.45747	-2.66296
1712	I425I	67379	787475	0.0855634	66181	741437	0.0892604	0.0873562	0.0873367	0	0.00032294	1	0.0423221	0.979477	1.0218	-0.0299171	0.031111
1713	I425L	150	2554	0.0587314	125	2663	0.0469395	0.0527123	0.0523827	-8.85249	0.00391347	8.55863e-19	0.223702	0.672321	0.537335	-0.572778	-0.896106
1714	I425V	358	3453	0.103678	244	2759	0.0884378	0.0969092	0.0966094	2.66066	0.00359045	0.00779879	0.157262	1.18684	1.01238	0.247127	0.0177537
1715	I425F	34	1627	0.0208974	69	1834	0.0376227	0.0297602	0.0285369	-11.9949	0.0048017	3.77755e-33	0.562003	0.23922	0.430681	-2.06359	-1.21531
1716	I425W	126	4447	0.0283337	64	4135	0.0154776	0.0221394	0.0211728	-21.3777	0.00305069	2.15405e-101	0.580689	0.324347	0.177178	-1.62439	-2.49673
1717	I425Y	63	1291	0.0487994	47	1307	0.0359602	0.0423403	0.0418514	-8.12254	0.00554211	4.56538e-16	0.303238	0.558625	0.41165	-0.840047	-1.28051
1718	I425G	1	4303	0.000232396	20	3922	0.00509944	0.00255319	0.00101347	-27.2295	0.00311438	2.90666e-163	1.90626	0.00266033	0.0583752	-8.55418	-4.0985
1719	I425P	1	2370	0.000421941	36	2561	0.014057	0.00750355	0.00260652	-19.8536	0.00402209	1.02679e-87	1.81715	0.00483012	0.160916	-7.69373	-2.63562
1720	F426H	21	1249	0.0168135	6	1313	0.00456969	0.0105386	0.00862393	-13.7682	0.00557934	3.95776e-43	1.1618	0.19247	0.052311	-2.37729	-4.25674
1721	F426K	0	942	0	3	1019	0.00294406	0.00152983	0	-13.4596	0.00637661	2.70497e-41	1.92444	0	0.0337018	#NAME?	-4.89103
1722	F426R	7	3451	0.0020284	33	2555	0.0129159	0.00666001	0.00445829	-22.1416	0.00364456	1.25813e-108	1.63475	0.0232198	0.147853	-5.4285	-2.75777
1723	F426D	0	767	0	21	807	0.0260223	0.0133418	0	-10.3985	0.00711783	2.51979e-25	1.95043	0	0.297887	#NAME?	-1.74716
1724	F426E	1	1156	0.000865052	0	856	0	0.000497018	0	-13.7976	0.00629524	2.63483e-43	1.74048	0.00990258	0	-6.65798	#NAME?
1725	F426C	9	1308	0.00688073	2	1046	0.00191205	0.0046729	0.00389507	-14.2061	0.00582026	8.39483e-46	1.0633	0.0787664	0.0218879	-3.66628	-5.51372
1726	F426M	65	1346	0.0482912	69	1147	0.0601569	0.0537505	0.053428	-5.93945	0.00565806	2.85981e-09	0.220755	0.552808	0.68864	-0.855149	-0.538179
1727	F426N	10	806	0.0124069	4	1093	0.00365965	0.0073723	0.00614448	-12.343	0.0064801	5.31279e-35	1.18651	0.142027	0.0418934	-2.81576	-4.57713
1728	F426Q	3	1134	0.0026455	0	1276	0	0.00124481	0	-14.9704	0.0057521	1.14561e-50	2.12522	0.0302841	0	-5.0453	#NAME?
1729	F426S	1	343	0.00291545	0	482	0	0.00121212	0	-8.76279	0.00983067	1.90479e-18	2.40525	0.0333743	0	-4.90512	#NAME?
1730	F426T	2	1864	0.00107296	3	1907	0.00157315	0.00132591	0.00130204	-18.7078	0.00459862	4.27308e-78	0.377243	0.0122826	0.0180085	-6.34724	-5.79518
1731	F426A	9	1554	0.00579151	2	956	0.00209205	0.00438247	0.00392971	-14.7207	0.00563652	4.74396e-49	0.844149	0.0662976	0.0239485	-3.9149	-5.38392
1732	F426I	126	1552	0.0811856	88	1872	0.0470085	0.0625	0.0602198	-5.14688	0.00482938	2.64859e-07	0.546832	0.929362	0.538125	-0.105687	-0.893987
1733	F426L	287	3716	0.0772336	296	3739	0.0791656	0.0782025	0.0781966	-2.79297	0.00327741	0.00522268	0.0247047	0.884123	0.906239	-0.177682	-0.142037
1734	F426V	67	2846	0.0235418	79	2683	0.0294447	0.0264062	0.0262416	-16.0402	0.00379983	6.69288e-58	0.22354	0.269492	0.337064	-1.89168	-1.5689
1735	F426F	67379	787475	0.0855634	66181	741437	0.0892604	0.0873562	0.0873367	0	0.00032294	1	0.0423221	0.979477	1.0218	-0.0299171	0.031111
1736	F426W	137	1160	0.118103	132	1316	0.100304	0.108643	0.108282	3.74764	0.00568003	0.000178505	0.163835	1.35198	1.14822	0.435069	0.199396
1737	F426Y	145	1494	0.0970549	175	1570	0.111465	0.104439	0.104189	3.34491	0.00510699	0.000823097	0.137977	1.11102	1.27598	0.151891	0.351608
1738	F426G	0	1462	0	2	1508	0.00132626	0.000673401	0	-16.729	0.00518158	8.05528e-63	1.9695	0	0.0151822	#NAME?	-6.04147
1739	F426P	2	1096	0.00182482	10	1411	0.00708717	0.0047866	0.00391621	-14.6402	0.00563991	1.55511e-48	1.09939	0.0208894	0.0811296	-5.58109	-3.62363
1740	Q427H	222	2078	0.106833	154	1759	0.0875497	0.0979932	0.0975158	2.33031	0.00456463	0.01979	0.196787	1.22296	1.00222	0.290382	0.00319286
1741	Q427K	217	2012	0.107853	253	2211	0.114428	0.111295	0.111247	5.50013	0.00435245	3.79517e-08	0.0590769	1.23463	1.3099	0.304083	0.389456
1742	Q427R	442	2696	0.163947	444	2685	0.165363	0.164653	0.164652	20.0183	0.00386133	3.81843e-89	0.00860317	1.87676	1.89298	0.908244	0.920656
1743	Q427D	139	1941	0.0716126	150	1800	0.0833333	0.0772521	0.0770306	-2.18636	0.00462146	0.0287893	0.151721	0.819777	0.953949	-0.286697	-0.0680164
1744	Q427E	116	1727	0.0671685	121	1598	0.0757196	0.0712782	0.0711504	-3.28049	0.00490112	0.00103629	0.119969	0.768904	0.866792	-0.379125	-0.206242
1745	Q427C	369	3952	0.0933704	360	3703	0.0972185	0.0952319	0.0952125	2.43382	0.00323592	0.0149405	0.0404069	1.06885	1.1129	0.0960559	0.15432
1746	Q427M	355	3614	0.0982291	344	3330	0.103303	0.100662	0.100631	3.9169	0.00339713	8.96957e-05	0.050408	1.12447	1.18255	0.169241	0.241904
1747	Q427N	121	1808	0.0669248	150	1923	0.0780031	0.0726347	0.0724227	-3.18141	0.00462736	0.00146559	0.152521	0.766114	0.892932	-0.38437	-0.163378
1748	Q427Q	67379	787475	0.0855634	66181	741437	0.0892604	0.0873562	0.0873367	0	0.00032294	1	0.0423221	0.979477	1.0218	-0.0299171	0.031111
1749	Q427S	275	3333	0.0825083	397	3656	0.108589	0.0961511	0.0952571	2.59752	0.00338587	0.00939005	0.271244	0.944504	1.24306	-0.0823717	0.313891
1750	Q427T	229	1397	0.163923	94	1139	0.0825285	0.127366	0.120443	7.12744	0.00561347	1.02254e-12	0.639058	1.87649	0.944736	0.908034	-0.0820171
1751	Q427A	235	2267	0.103661	196	2640	0.0742424	0.0878337	0.0866213	0.118265	0.00403728	0.905858	0.334937	1.18665	0.849882	0.246894	-0.234666
1752	Q427I	363	2792	0.130014	270	2454	0.110024	0.120663	0.120247	8.52421	0.00390736	1.53858e-17	0.165666	1.48832	1.25949	0.573689	0.332842
1753	Q427L	208	2109	0.0986249	187	1974	0.0947315	0.0967426	0.096723	2.12106	0.00442531	0.0339165	0.0402453	1.129	1.08443	0.175042	0.116934
1754	Q427V	202	2545	0.0793713	208	2137	0.0973327	0.0875694	0.0871166	0.0515814	0.00413283	0.958862	0.20511	0.908594	1.1142	-0.138292	0.156015
1755	Q427F	236	2493	0.0946651	267	2468	0.108185	0.101391	0.101165	3.49447	0.00401623	0.000474995	0.133342	1.08367	1.23843	0.115922	0.308515
1756	Q427W	169	2800	0.0603571	122	2520	0.0484127	0.0546992	0.0543706	-8.42626	0.00387562	3.56891e-17	0.218366	0.690931	0.554199	-0.533386	-0.851525
1757	Q427Y	108	1919	0.0562793	153	1816	0.0842511	0.0698795	0.0684772	-3.77897	0.00462473	0.000157478	0.400286	0.644251	0.964455	-0.634305	-0.0522146
1758	Q427G	230	2828	0.0813296	239	3231	0.0739709	0.0774055	0.0773188	-2.73834	0.00363386	0.00617506	0.0950663	0.931011	0.846773	-0.10313	-0.239952
1759	Q427P	29	2552	0.0113636	33	3112	0.0106041	0.0109463	0.0109398	-20.3585	0.00375322	3.90331e-92	0.0693861	0.130084	0.121389	-2.94249	-3.04229
0	K428H	27	252	0.107143	19	236	0.0805085	0.0942623	0.0933119	2.07573	0.0115855	0.0379191	0.282556	1.52595	1.14662	0.609705	0.197382
1	K428K	7521	100988	0.0744742	6056	92378	0.0655567	0.070214	0.070072	0	0.000821728	1	0.127004	1.06067	0.93367	0.0849819	-0.0990147
2	K428R	99	1151	0.0860122	90	1145	0.0786026	0.0823171	0.0822336	2.25429	0.00536891	0.024178	0.0900122	1.225	1.11947	0.292782	0.162819
3	K428D	18	288	0.0625	14	251	0.0557769	0.0593692	0.0592739	-0.984225	0.0110186	0.325005	0.113242	0.890136	0.794384	-0.167903	-0.332091
4	K428E	11	361	0.0304709	19	278	0.0683453	0.0469484	0.0433025	-2.29914	0.0101193	0.0214971	0.806725	0.433972	0.973386	-1.20433	-0.0389161
5	K428C	74	999	0.0740741	69	899	0.0767519	0.0753425	0.0753306	0.869899	0.00589547	0.384356	0.0355427	1.05498	1.09311	0.07721	0.128445
6	K428M	24	300	0.08	14	318	0.0440252	0.0614887	0.0588326	-0.847733	0.0102925	0.396587	0.585065	1.13937	0.627014	0.188241	-0.673431
7	K428N	11	163	0.0674847	19	159	0.119497	0.0931677	0.0894828	1.6103	0.0142543	0.107332	0.558264	0.961128	1.70189	-0.0571991	0.767142
8	K428Q	27	453	0.0596026	33	483	0.068323	0.0641026	0.0639538	-0.730152	0.00837008	0.465297	0.136037	0.848871	0.973068	-0.236382	-0.0393878
9	K428S	22	516	0.0426357	41	516	0.0794574	0.0610465	0.0582041	-1.14993	0.00797224	0.250174	0.603175	0.607224	1.13165	-0.719698	0.178422
10	K428T	18	310	0.0580645	17	264	0.0643939	0.0609756	0.0608944	-0.865134	0.0106786	0.386965	0.103803	0.826965	0.91711	-0.274102	-0.124834
11	K428A	75	834	0.0899281	66	803	0.0821918	0.0861332	0.0860462	2.50801	0.00634733	0.0121413	0.0898176	1.28077	1.17059	0.357013	0.227235
12	K428I	25	446	0.0560538	21	441	0.047619	0.0518602	0.0516883	-2.13565	0.008594	0.0327079	0.162644	0.798328	0.678199	-0.324946	-0.56022
13	K428L	19	307	0.0618893	18	274	0.0656934	0.0636833	0.063655	-0.615246	0.0106148	0.538393	0.0597359	0.881437	0.935617	-0.18207	-0.0960096
14	K428V	64	831	0.0770156	49	983	0.0498474	0.0622933	0.0608408	-1.31481	0.00602423	0.188574	0.436134	1.09687	0.709935	0.133393	-0.49424
15	K428F	10	179	0.0558659	4	157	0.0254777	0.0416667	0.0387094	-2.0469	0.0139466	0.040668	0.729317	0.795652	0.362858	-0.32979	-1.46252
16	K428W	14	240	0.0583333	24	307	0.0781759	0.0694698	0.0687515	-0.0680222	0.01094	0.945768	0.285628	0.830793	1.11339	-0.267438	0.154965
17	K428Y	23	360	0.0638889	13	262	0.0496183	0.0578778	0.0574357	-1.20251	0.0102587	0.229166	0.246564	0.909917	0.706673	-0.136194	-0.500886
18	K428G	39	317	0.123028	17	294	0.0578231	0.091653	0.085551	2.06988	0.0103576	0.038464	0.711436	1.75219	0.823527	0.809161	-0.280112
19	K428P	16	343	0.0466472	6	311	0.0192926	0.0336391	0.0306541	-3.65753	0.00999988	0.000254659	0.813178	0.664358	0.274769	-0.589967	-1.86371
20	S429H	16	423	0.0378251	9	282	0.0319149	0.035461	0.0353399	-3.6079	0.00963247	0.000308684	0.166667	0.538711	0.454537	-0.892416	-1.13753
21	S429K	9	209	0.0430622	9	195	0.0461538	0.0445545	0.0445277	-2.01714	0.0127208	0.0436809	0.0693903	0.613299	0.657331	-0.705337	-0.605308
22	S429R	33	569	0.0579965	18	542	0.0332103	0.0459046	0.0441855	-3.16506	0.00768056	0.00155053	0.539949	0.825996	0.472987	-0.275793	-1.08013
23	S429D	51	1466	0.0347885	69	1979	0.0348661	0.0348331	0.0348331	-8.08919	0.00437385	6.00649e-16	0.00222644	0.495464	0.496569	-1.01315	-1.00993
24	S429E	24	550	0.0436364	24	612	0.0392157	0.0413081	0.0412493	-3.84928	0.00750943	0.000118465	0.107017	0.621477	0.558517	-0.686228	-0.840328
25	S429C	20	252	0.0793651	12	280	0.0428571	0.0601504	0.0573831	-0.90738	0.0110909	0.364206	0.606944	1.13033	0.610379	0.176746	-0.712223
26	S429M	20	422	0.0473934	12	366	0.0327869	0.0406091	0.0399388	-3.2485	0.00911338	0.00116013	0.359685	0.674985	0.466957	-0.567074	-1.09864
27	S429N	13	398	0.0326633	24	408	0.0588235	0.0459057	0.0439937	-2.69714	0.00901261	0.00699371	0.569868	0.465197	0.837775	-1.10409	-0.255365
28	S429Q	34	905	0.0375691	39	953	0.0409234	0.0392896	0.0392537	-5.20221	0.00594448	1.96928e-07	0.0853748	0.535065	0.582838	-0.902214	-0.778833
29	S429S	7521	100988	0.0744742	6056	92378	0.0655567	0.070214	0.070072	0	0.000821728	1	0.127004	1.06067	0.93367	0.0849819	-0.0990147
30	S429T	30	622	0.0482315	37	614	0.0602606	0.0542071	0.0538728	-2.19695	0.00728596	0.0280241	0.22191	0.686922	0.858242	-0.541783	-0.220544
31	S429A	15	180	0.0833333	12	232	0.0517241	0.065534	0.0637067	-0.371415	0.0126005	0.710329	0.482333	1.18685	0.736664	0.247135	-0.440921
32	S429I	9	412	0.0218447	7	324	0.0216049	0.0217391	0.0217388	-5.14344	0.0094246	2.69756e-07	0.0110272	0.311115	0.307701	-1.68448	-1.7004
33	S429L	24	515	0.0466019	18	571	0.0315236	0.038674	0.037944	-4.06126	0.00776605	4.88083e-05	0.389882	0.663713	0.448965	-0.591369	-1.15532
34	S429V	31	752	0.0412234	50	804	0.0621891	0.0520566	0.0509815	-2.79467	0.00649717	0.00519526	0.402748	0.587111	0.885707	-0.768295	-0.175098
35	S429F	15	449	0.0334076	16	402	0.039801	0.0364277	0.0362885	-3.85276	0.00876937	0.000116794	0.17551	0.475796	0.566853	-1.07158	-0.818954
36	S429W	16	452	0.0353982	8	362	0.0220994	0.029484	0.0287073	-4.54359	0.00896426	5.53031e-06	0.45105	0.504148	0.314744	-0.988081	-1.66775
37	S429Y	24	513	0.0467836	10	511	0.0195695	0.0332031	0.0302835	-4.629	0.00799543	3.67433e-06	0.819626	0.666301	0.278712	-0.585755	-1.84315
38	S429G	12	324	0.037037	11	247	0.0445344	0.0402802	0.0401114	-2.79697	0.0107022	0.00515839	0.186131	0.527488	0.634267	-0.92279	-0.656838
39	S429P	20	496	0.0403226	6	355	0.0169014	0.0305523	0.0280556	-4.52352	0.00876788	6.08187e-06	0.766593	0.574281	0.240713	-0.800171	-2.05462
40	E430H	29	314	0.0923567	21	257	0.0817121	0.0875657	0.0874041	1.61983	0.010712	0.105268	0.121562	1.31536	1.16376	0.395458	0.21879
41	E430K	93	838	0.110979	82	783	0.104725	0.107958	0.107913	5.91056	0.00638586	3.40938e-09	0.0579216	1.58058	1.49152	0.66045	0.576781
42	E430R	64	486	0.131687	41	445	0.0921348	0.112782	0.11102	5.06441	0.00840531	4.09662e-07	0.350698	1.87551	1.3122	0.907285	0.391988
43	E430D	31	291	0.106529	11	246	0.0447154	0.0782123	0.0715747	0.724295	0.0110429	0.468885	0.790333	1.51721	0.636845	0.601418	-0.650985
44	E430E	7521	100988	0.0744742	6056	92378	0.0655567	0.070214	0.070072	0	0.000821728	1	0.127004	1.06067	0.93367	0.0849819	-0.0990147
45	E430C	24	250	0.096	14	208	0.0673077	0.0829694	0.0817031	1.0669	0.0119556	0.286016	0.345818	1.36725	0.958608	0.451276	-0.0609873
46	E430M	32	392	0.0816327	27	396	0.0681818	0.0748731	0.0745706	0.510769	0.00912173	0.609513	0.179648	1.16263	0.971057	0.217388	-0.0423716
47	E430N	54	541	0.0998152	45	493	0.0912779	0.0957447	0.0956494	3.20165	0.00797423	0.00136644	0.089167	1.42158	1.3	0.5075	0.378507
48	E430Q	43	534	0.0805243	32	586	0.0546075	0.0669643	0.0657165	-0.424473	0.00765588	0.671221	0.387025	1.14684	0.77773	0.197666	-0.362659
49	E430S	53	570	0.0929825	53	557	0.0951526	0.094055	0.0940488	3.12052	0.00764008	0.00180533	0.0230732	1.32427	1.35518	0.4052	0.438484
50	E430T	23	373	0.0616622	28	371	0.0754717	0.0685484	0.0681999	-0.177477	0.00938496	0.859134	0.201456	0.878204	1.07488	-0.187372	0.104177
51	E430A	27	208	0.129808	16	174	0.091954	0.112565	0.110943	3.23467	0.013093	0.00121785	0.336281	1.84874	1.30963	0.886545	0.389154
52	E430I	70	777	0.0900901	31	623	0.0497592	0.0721429	0.0691759	0.28142	0.00685402	0.778388	0.559042	1.28308	0.70868	0.35961	-0.496795
53	E430L	13	160	0.08125	17	224	0.0758929	0.078125	0.0780807	0.606063	0.0130531	0.544473	0.0685714	1.15718	1.08088	0.210609	0.112205
54	E430V	26	266	0.0977444	27	276	0.0978261	0.097786	0.097786	2.50747	0.0109959	0.0121598	0.000835765	1.39209	1.39326	0.477255	0.478461
55	E430F	77	851	0.0904818	53	711	0.0745429	0.0832266	0.0828429	2.00335	0.00649543	0.0451394	0.191512	1.28866	1.06165	0.365869	0.0863122
56	E430W	19	282	0.0673759	24	309	0.0776699	0.072758	0.0725753	0.241674	0.0105268	0.809033	0.141483	0.959579	1.10619	-0.0595264	0.145597
57	E430Y	87	831	0.104693	67	754	0.0888594	0.0971609	0.0968369	4.17563	0.00645337	2.97165e-05	0.162964	1.49106	1.26555	0.576336	0.339766
58	E430G	21	246	0.0853659	24	275	0.0872727	0.0863724	0.0863671	1.44113	0.0112123	0.149547	0.0220774	1.2158	1.24295	0.2819	0.313772
59	E430P	40	457	0.0875274	39	424	0.0919811	0.0896708	0.0896432	2.25381	0.00863286	0.0242081	0.0496681	1.24658	1.31001	0.317975	0.389579
60	R431H	24	338	0.0710059	24	333	0.0720721	0.071535	0.071533	0.133691	0.00988115	0.893647	0.014904	1.01128	1.02646	0.0161805	0.0376816
61	R431K	51	773	0.0659767	61	825	0.0739394	0.0700876	0.0699743	-0.0196929	0.00641799	0.984288	0.11361	0.939652	1.05306	-0.0898018	0.0745845
62	R431R	7521	100988	0.0744742	6056	92378	0.0655567	0.070214	0.070072	0	0.000821728	1	0.127004	1.06067	0.93367	0.0849819	-0.0990147
63	R431D	21	278	0.0755396	14	267	0.0524345	0.0642202	0.0631678	-0.546934	0.0109589	0.584424	0.35978	1.07585	0.746781	0.105474	-0.421244
64	R431E	16	298	0.0536913	18	316	0.056962	0.0553746	0.0553504	-1.43729	0.0103246	0.150637	0.0590659	0.76468	0.811263	-0.387071	-0.301758
65	R431C	80	1160	0.0689655	44	1024	0.0429688	0.0567766	0.0552446	-2.44642	0.00549271	0.0144284	0.457879	0.982219	0.611968	-0.0258835	-0.708471
66	R431M	64	849	0.0753828	52	864	0.0601852	0.0677175	0.0672904	-0.402682	0.00619979	0.687182	0.224427	1.07361	0.857168	0.102477	-0.22235
67	R431N	17	345	0.0492754	26	276	0.0942029	0.0692432	0.0657222	-0.0945374	0.0102694	0.924682	0.648837	0.701788	1.34165	-0.510892	0.424013
68	R431Q	171	2354	0.0726423	152	2110	0.0720379	0.0723566	0.072356	0.553748	0.00386933	0.579751	0.00835302	1.03458	1.02598	0.0490514	0.0369977
69	R431S	34	454	0.0748899	22	412	0.0533981	0.0646651	0.0637583	-0.637765	0.0087005	0.523627	0.332355	1.06659	0.760504	0.0930118	-0.394971
70	R431T	36	541	0.0665434	22	531	0.0414313	0.0541045	0.0526231	-2.05982	0.00782082	0.0394153	0.464142	0.947723	0.590071	-0.0774623	-0.761039
71	R431A	66	863	0.0764774	38	868	0.0437788	0.0600809	0.0578161	-1.64365	0.006165	0.100248	0.544243	1.0892	0.623505	0.123275	-0.681526
72	R431I	31	477	0.0649895	23	459	0.0501089	0.0576923	0.0572091	-1.49631	0.00836838	0.134573	0.25793	0.925592	0.71366	-0.111552	-0.486691
73	R431L	31	536	0.0578358	22	431	0.0510441	0.0548087	0.0547037	-1.87118	0.00823292	0.0613196	0.123917	0.823708	0.726979	-0.279795	-0.460015
74	R431V	39	560	0.0696429	23	480	0.0479167	0.0596154	0.058604	-1.33463	0.00794126	0.181999	0.364439	0.991866	0.682438	-0.0117833	-0.551231
75	R431F	33	544	0.0606618	32	539	0.0593692	0.0600185	0.060015	-1.31	0.00778287	0.190197	0.0215361	0.863955	0.845547	-0.210971	-0.242044
76	R431W	57	807	0.070632	41	758	0.0540897	0.0626198	0.0620686	-1.17155	0.0064822	0.241379	0.26417	1.00595	0.770355	0.00856262	-0.376405
77	R431Y	26	275	0.0945455	11	266	0.0413534	0.0683919	0.0629598	-0.165647	0.0110001	0.868435	0.777754	1.34653	0.588962	0.429249	-0.763753
78	R431G	40	566	0.0706714	36	585	0.0615385	0.0660295	0.0658717	-0.554059	0.00755238	0.579539	0.138316	1.00651	0.876441	0.00936732	-0.19027
79	R431P	94	1759	0.0534395	73	1480	0.0493243	0.0515591	0.0515182	-4.12922	0.00451777	3.63996e-05	0.0798138	0.761094	0.702486	-0.393853	-0.509459
80	G432H	16	177	0.0903955	18	220	0.0818182	0.0856423	0.0855369	1.20164	0.0128394	0.229503	0.100153	1.28743	1.16527	0.364492	0.220663
81	G432K	61	698	0.0873926	44	637	0.0690738	0.0786517	0.0781138	1.20199	0.00701976	0.229367	0.23291	1.24466	0.983761	0.315752	-0.0236205
82	G432R	33	310	0.106452	22	330	0.0666667	0.0859375	0.0836286	1.55371	0.01012	0.120253	0.462952	1.5161	0.949478	0.600367	-0.0747931
83	G432D	29	463	0.062635	34	535	0.0635514	0.0631263	0.0631246	-0.874292	0.00810684	0.38196	0.0145171	0.892058	0.90511	-0.16479	-0.143835
84	G432E	13	140	0.0928571	10	175	0.0571429	0.0730159	0.0709046	0.194462	0.0144084	0.845814	0.48913	1.32249	0.813839	0.403254	-0.297186
85	G432C	73	930	0.0784946	63	810	0.0777778	0.0781609	0.0781601	1.29099	0.00615569	0.196708	0.00917141	1.11793	1.10772	0.160835	0.147599
86	G432M	35	375	0.0933333	17	337	0.0504451	0.0730337	0.0697523	0.293909	0.00959381	0.768827	0.587239	1.32927	0.718448	0.410634	-0.477044
87	G432N	45	511	0.0880626	33	455	0.0725275	0.0807453	0.0803693	1.27743	0.00824416	0.20145	0.192397	1.2542	1.03295	0.326771	0.0467689
88	G432Q	27	439	0.0615034	31	460	0.0673913	0.0645161	0.0644489	-0.667202	0.00853995	0.504643	0.0912623	0.875942	0.959799	-0.191092	-0.0591963
89	G432S	74	971	0.0762101	57	892	0.0639013	0.0703167	0.070046	0.0172651	0.00594815	0.986225	0.175047	1.0854	0.910094	0.118223	-0.135912
90	G432T	8	118	0.0677966	7	133	0.0526316	0.059761	0.0592845	-0.647789	0.0161365	0.517122	0.253762	0.965571	0.749588	-0.0505456	-0.41583
91	G432A	85	1152	0.0737847	56	998	0.0561122	0.0655814	0.0649786	-0.836345	0.0055391	0.402961	0.269474	1.05085	0.79916	0.0715634	-0.323444
92	G432I	20	207	0.0966184	8	219	0.0365297	0.0657277	0.0586008	-0.362026	0.0123922	0.717332	0.914206	1.37606	0.520262	0.460539	-0.94269
93	G432L	28	347	0.0806916	20	318	0.0628931	0.0721805	0.0716268	0.198119	0.00992561	0.842952	0.246584	1.14922	0.895734	0.200661	-0.158857
94	G432V	37	554	0.066787	34	516	0.0658915	0.0663551	0.0663536	-0.492731	0.00783157	0.622203	0.013496	0.951192	0.938438	-0.0721913	-0.0916669
95	G432F	24	412	0.0582524	20	347	0.0576369	0.057971	0.0579702	-1.31793	0.00928958	0.187528	0.0106181	0.829641	0.820875	-0.269441	-0.284766
96	G432W	8	170	0.0470588	9	124	0.0725806	0.0578231	0.0564949	-0.83099	0.014911	0.405979	0.441377	0.67022	1.03371	-0.577293	0.0478262
97	G432Y	16	210	0.0761905	14	259	0.0540541	0.0639659	0.0630343	-0.528992	0.0118114	0.596811	0.346066	1.08512	0.769847	0.117852	-0.377356
98	G432G	7521	100988	0.0744742	6056	92378	0.0655567	0.070214	0.070072	0	0.000821728	1	0.127004	1.06067	0.93367	0.0849819	-0.0990147
99	G432P	26	239	0.108787	4	156	0.025641	0.0759494	0.0614748	0.445636	0.0128701	0.65586	1.09475	1.54936	0.365184	0.63167	-1.4533
100	G433H	15	248	0.0604839	5	222	0.0225225	0.0425532	0.0379311	-2.34517	0.0117948	0.0190182	0.892092	0.861422	0.32077	-0.215208	-1.64039
101	G433K	40	590	0.0677966	36	586	0.0614334	0.0646259	0.0645475	-0.747908	0.00747171	0.454516	0.0984616	0.965571	0.874946	-0.0505456	-0.192734
102	G433R	17	243	0.0699588	6	226	0.0265487	0.0490405	0.0438601	-1.79306	0.0118085	0.0729626	0.88519	0.996366	0.378111	-0.00525219	-1.40312
103	G433D	23	678	0.0339233	14	518	0.027027	0.0309365	0.0307433	-5.30835	0.00739921	1.10625e-07	0.222917	0.483142	0.384924	-1.04948	-1.37736
104	G433E	20	575	0.0347826	14	512	0.0273438	0.0312787	0.0310555	-5.01719	0.00776037	5.2433e-07	0.237825	0.49538	0.389434	-1.01339	-1.36055
105	G433C	28	446	0.0627803	24	405	0.0592593	0.0611046	0.0610792	-1.03804	0.00877562	0.299253	0.0576227	0.894128	0.843981	-0.161448	-0.244718
106	G433M	22	304	0.0723684	11	349	0.0315186	0.050536	0.0464109	-1.96558	0.0100113	0.0493466	0.808331	1.03068	0.448894	0.0436016	-1.15555
107	G433N	61	985	0.0619289	55	946	0.0581395	0.0600725	0.0600426	-1.73668	0.0058396	0.0824442	0.0630804	0.882003	0.828033	-0.181145	-0.272239
108	G433Q	12	319	0.0376176	6	248	0.0241935	0.031746	0.0310132	-3.58239	0.0107381	0.000340459	0.422856	0.535756	0.344569	-0.900353	-1.53714
109	G433S	9	302	0.0298013	15	299	0.0501672	0.0399334	0.0386156	-2.90263	0.0104321	0.00370039	0.509996	0.424436	0.71449	-1.23638	-0.485014
110	G433T	10	210	0.047619	4	136	0.0294118	0.0404624	0.0394029	-2.16475	0.0137436	0.0304066	0.44998	0.678199	0.418887	-0.56022	-1.25537
111	G433A	21	230	0.0913043	9	209	0.0430622	0.0683371	0.0638411	-0.153738	0.0122082	0.877816	0.705943	1.30037	0.613299	0.378925	-0.705337
112	G433I	34	737	0.046133	22	670	0.0328358	0.039801	0.039237	-4.4551	0.00682655	8.38524e-06	0.334091	0.657034	0.467653	-0.60596	-1.09649
113	G433L	20	317	0.0630915	17	348	0.0488506	0.0556391	0.0551862	-1.46896	0.00992191	0.141843	0.255951	0.89856	0.695738	-0.154313	-0.523383
114	G433V	55	1246	0.0441413	38	1182	0.0321489	0.0383031	0.0378286	-6.13176	0.0052042	8.69144e-10	0.313091	0.628667	0.45787	-0.669631	-1.12699
115	G433F	16	318	0.0503145	13	306	0.0424837	0.0464744	0.0463088	-2.31837	0.0102398	0.0204295	0.168497	0.716587	0.60506	-0.480785	-0.724851
116	G433W	23	700	0.0328571	27	709	0.0380818	0.0354862	0.0353898	-5.09182	0.00682032	3.54644e-07	0.147231	0.467957	0.542368	-1.09555	-0.882657
117	G433Y	17	355	0.0478873	12	339	0.0353982	0.0417867	0.0413156	-2.92768	0.00970981	0.00341497	0.298877	0.68202	0.504148	-0.552115	-0.988081
118	G433G	7521	100988	0.0744742	6056	92378	0.0655567	0.070214	0.070072	0	0.000821728	1	0.127004	1.06067	0.93367	0.0849819	-0.0990147
119	G433P	7	195	0.0358974	6	143	0.041958	0.0384615	0.0383467	-2.28356	0.0139048	0.0223977	0.157576	0.511258	0.597574	-0.967878	-0.742811
120	F434H	8	336	0.0238095	8	288	0.0277778	0.025641	0.0255652	-4.35483	0.0102353	1.3317e-05	0.154762	0.339099	0.395616	-1.56022	-1.33783
121	F434K	20	594	0.03367	13	613	0.0212072	0.0273405	0.0266246	-5.8217	0.00736443	5.82521e-09	0.455838	0.479534	0.302036	-1.06029	-1.72721
122	F434R	33	637	0.0518053	17	625	0.0272	0.0396197	0.0376532	-4.24544	0.0072064	2.18162e-05	0.621039	0.737821	0.387387	-0.438658	-1.36815
123	F434D	20	523	0.0382409	9	556	0.0161871	0.0268767	0.0245549	-5.5648	0.00778775	2.62457e-08	0.820556	0.544634	0.230539	-0.876642	-2.11692
124	F434E	17	286	0.0594406	1	278	0.00359712	0.0319149	0.0149162	-3.55722	0.0107666	0.000374796	1.74976	0.846563	0.0512308	-0.240311	-4.28684
125	F434C	88	1476	0.0596206	65	1054	0.0616698	0.0604743	0.0604659	-1.90651	0.00510865	0.0565839	0.033886	0.849127	0.878312	-0.235948	-0.187194
126	F434M	43	580	0.0741379	33	472	0.0699153	0.0722433	0.0722127	0.256892	0.0078996	0.797262	0.0584507	1.05589	0.995745	0.0784531	-0.00615146
127	F434N	25	711	0.0351617	20	630	0.031746	0.033557	0.0335135	-5.24433	0.00698983	1.56852e-07	0.101788	0.50078	0.452133	-0.997752	-1.14518
128	F434Q	13	285	0.045614	6	302	0.0198675	0.032368	0.0297437	-3.58596	0.0105539	0.000335839	0.795431	0.649643	0.282957	-0.622281	-1.82134
129	F434S	18	284	0.0633803	7	239	0.0292887	0.0478011	0.04454	-2.00415	0.0111832	0.0450536	0.713196	0.902673	0.417135	-0.147725	-1.26141
130	F434T	4	132	0.030303	2	166	0.0120482	0.0201342	0.0181281	-3.38262	0.014805	0.00071798	0.906657	0.431581	0.171592	-1.2123	-2.54294
131	F434A	80	1446	0.055325	59	1266	0.0466035	0.0512537	0.0510672	-3.84427	0.0049321	0.000120912	0.170165	0.787949	0.663735	-0.343826	-0.591321
132	F434I	36	492	0.0731707	33	472	0.0699153	0.0715768	0.0715582	0.16518	0.00825019	0.868802	0.0454823	1.04211	0.995745	0.059508	-0.00615146
133	F434L	166	1980	0.0838384	144	1806	0.0797342	0.0818806	0.0818549	2.77832	0.00419917	0.00546413	0.0501238	1.19404	1.13559	0.255852	0.18344
134	F434V	71	898	0.0790646	60	788	0.0761421	0.0776987	0.077685	1.1971	0.00625237	0.231268	0.0376127	1.12605	1.08443	0.171273	0.116936
135	F434F	7521	100988	0.0744742	6056	92378	0.0655567	0.070214	0.070072	0	0.000821728	1	0.127004	1.06067	0.93367	0.0849819	-0.0990147
136	F434W	80	845	0.0946746	53	690	0.0768116	0.086645	0.0861816	2.50742	0.00655293	0.0121616	0.206163	1.34837	1.09396	0.431218	0.129565
137	F434Y	41	551	0.0744102	25	429	0.0582751	0.0673469	0.0668598	-0.350421	0.00818176	0.726023	0.239582	1.05976	0.829964	0.083741	-0.26888
138	F434G	7	156	0.0448718	2	178	0.011236	0.0269461	0.0214529	-3.09367	0.0139859	0.00197696	1.24826	0.639072	0.160024	-0.64595	-2.64364
139	F434P	10	389	0.0257069	15	420	0.0357143	0.0309023	0.0304917	-4.37174	0.00899222	1.2326e-05	0.323838	0.366123	0.508649	-1.4496	-0.975257
140	R435H	55	637	0.0863422	32	592	0.0540541	0.0707893	0.0689048	0.0786777	0.00731162	0.937289	0.456117	1.2297	0.769847	0.298308	-0.377356
141	R435K	23	371	0.0619946	27	417	0.0647482	0.0634518	0.0634369	-0.741557	0.00911895	0.458356	0.0433966	0.882938	0.922155	-0.179616	-0.116919
142	R435R	7521	100988	0.0744742	6056	92378	0.0655567	0.070214	0.070072	0	0.000821728	1	0.127004	1.06067	0.93367	0.0849819	-0.0990147
143	R435D	16	454	0.0352423	15	419	0.0357995	0.0355097	0.0355086	-4.00825	0.00865821	6.11701e-05	0.0156924	0.501927	0.509863	-0.994451	-0.971818
144	R435E	29	435	0.0666667	18	441	0.0408163	0.053653	0.0520765	-1.915	0.00864807	0.0554928	0.481806	0.949478	0.581313	-0.0747931	-0.782612
145	R435C	39	656	0.0594512	39	534	0.0730337	0.0655462	0.0652021	-0.628391	0.00742815	0.529748	0.20722	0.846715	1.04016	-0.240052	0.0568038
146	R435M	23	561	0.0409982	31	628	0.0493631	0.0454163	0.0452226	-3.33965	0.00742523	0.000838832	0.184181	0.583904	0.703037	-0.776198	-0.508327
147	R435N	34	614	0.0553746	32	593	0.0539629	0.054681	0.0546765	-2.10683	0.00737268	0.0351324	0.0258169	0.788655	0.768549	-0.342535	-0.379791
148	R435Q	55	646	0.0851393	28	447	0.0626398	0.0759378	0.0750971	0.73837	0.00775192	0.460289	0.296289	1.21257	0.892127	0.278067	-0.164679
149	R435S	51	637	0.0800628	48	633	0.0758294	0.0779528	0.077924	1.07548	0.00719561	0.282158	0.0543074	1.14027	1.07998	0.189373	0.110998
150	R435T	36	608	0.0592105	20	414	0.0483092	0.0547945	0.0545257	-1.92521	0.00800923	0.0542026	0.19895	0.843287	0.688028	-0.245905	-0.539461
151	R435A	38	654	0.058104	43	666	0.0645646	0.0613636	0.0612785	-1.2547	0.00705378	0.209589	0.105284	0.827527	0.91954	-0.273122	-0.121016
152	R435I	43	583	0.0737564	26	577	0.0450607	0.0594828	0.0577234	-1.42679	0.00752125	0.153641	0.482422	1.05045	0.641762	0.0710102	-0.63989
153	R435L	23	557	0.0412926	25	666	0.0375375	0.0392478	0.0392034	-4.23045	0.00731985	2.33223e-05	0.0956769	0.588097	0.534616	-0.765874	-0.903425
154	R435V	30	490	0.0612245	28	524	0.0534351	0.0571992	0.057067	-1.61849	0.00804129	0.105556	0.13618	0.87197	0.761032	-0.19765	-0.393971
155	R435F	35	610	0.057377	28	653	0.042879	0.0498812	0.0493558	-2.82136	0.00720672	0.00478204	0.290651	0.817174	0.61069	-0.291285	-0.711487
156	R435W	57	1053	0.0541311	52	930	0.055914	0.0549672	0.05496	-2.64645	0.00576122	0.00813417	0.0324361	0.770944	0.796337	-0.375302	-0.32855
157	R435Y	2643	43442	0.0608397	2055	37919	0.0541945	0.0577427	0.0576469	-11.9765	0.00104132	4.71746e-33	0.115084	0.86649	0.771847	-0.206745	-0.373613
158	R435G	33	500	0.066	25	433	0.0577367	0.0621651	0.0620274	-0.960155	0.00838296	0.336977	0.132925	0.939983	0.822296	-0.0892927	-0.28227
159	R435P	20	582	0.0343643	21	589	0.0356537	0.0350128	0.0350069	-4.70683	0.00747875	2.51603e-06	0.0368262	0.489422	0.507785	-1.03085	-0.977709
160	L436H	27	725	0.0372414	43	686	0.0626822	0.0496102	0.0479689	-3.02104	0.00682011	0.00251912	0.512815	0.530398	0.892731	-0.914852	-0.163703
161	L436K	24	295	0.0813559	13	283	0.0459364	0.0640138	0.0614964	-0.582597	0.0106423	0.560165	0.553311	1.15869	0.654234	0.212489	-0.612121
162	L436R	26	708	0.0367232	31	696	0.0445402	0.0405983	0.0404099	-4.33354	0.00683407	1.46731e-05	0.192547	0.523018	0.63435	-0.935068	-0.65665
163	L436D	60	1569	0.0382409	35	1341	0.0260999	0.032646	0.0320688	-7.90163	0.00475446	2.75288e-15	0.371898	0.544634	0.37172	-0.876642	-1.42771
164	L436E	5	233	0.0214592	2	207	0.00966184	0.0159091	0.0147427	-4.45678	0.0121848	8.31993e-06	0.74155	0.305626	0.137606	-1.71016	-2.86139
165	L436C	306	4635	0.0660194	252	3989	0.0631737	0.0647032	0.0646876	-1.96276	0.00280769	0.0496735	0.0439807	0.94026	0.899731	-0.0888683	-0.152434
166	L436M	26	275	0.0945455	11	262	0.0419847	0.0689013	0.0636258	-0.118893	0.011041	0.90536	0.762841	1.34653	0.597954	0.429249	-0.741894
167	L436N	23	626	0.0367412	14	654	0.0214067	0.0289063	0.0278796	-5.77536	0.00715242	7.67906e-09	0.53049	0.523275	0.304878	-0.934359	-1.71369
168	L436Q	10	449	0.0222717	10	408	0.0245098	0.0233372	0.0233105	-5.36632	0.00873536	8.03578e-08	0.0959021	0.317198	0.349073	-1.65655	-1.5184
169	L436S	6	275	0.0218182	7	289	0.0242215	0.0230496	0.0230183	-4.38137	0.0107647	1.17934e-05	0.104265	0.310738	0.344966	-1.68623	-1.53547
170	L436T	55	800	0.06875	38	816	0.0465686	0.0575495	0.0564736	-1.98563	0.00637807	0.0470744	0.385431	0.979149	0.663238	-0.030399	-0.5924
171	L436A	26	554	0.0469314	24	548	0.0437956	0.0453721	0.0453449	-3.22138	0.00771159	0.00127575	0.0691128	0.668405	0.623745	-0.581205	-0.680972
172	L436I	9	87	0.103448	5	96	0.0520833	0.0765027	0.0721743	0.332784	0.0188973	0.739297	0.671413	1.47333	0.74178	0.559079	-0.430937
173	L436L	7521	100988	0.0744742	6056	92378	0.0655567	0.070214	0.070072	0	0.000821728	1	0.127004	1.06067	0.93367	0.0849819	-0.0990147
174	L436V	12	161	0.0745342	14	170	0.0823529	0.0785498	0.0784524	0.592991	0.0140573	0.553187	0.0995391	1.06153	1.17288	0.0861431	0.230061
175	L436F	11	388	0.0283505	17	453	0.0375276	0.0332937	0.0329733	-4.18577	0.00882044	2.84203e-05	0.27564	0.403773	0.534475	-1.30838	-0.903807
176	L436W	24	385	0.0623377	11	264	0.0416667	0.0539291	0.0529151	-1.62155	0.0100428	0.104899	0.383299	0.887824	0.593424	-0.171655	-0.752865
177	L436Y	13	384	0.0338542	0	402	0	0.0165394	0	-5.88597	0.00911907	3.95733e-09	2.04688	0.482157	0	-1.05243	#NAME?
178	L436G	12	438	0.0273973	7	409	0.0171149	0.0224321	0.0218293	-5.43813	0.00878646	5.38438e-08	0.458376	0.390197	0.243754	-1.35773	-2.0365
179	L436P	24	537	0.0446927	10	451	0.0221729	0.034413	0.0324548	-4.3983	0.00813974	1.091e-05	0.654399	0.636522	0.315791	-0.651718	-1.66296
180	K437H	33	544	0.0606618	40	587	0.0681431	0.0645447	0.064436	-0.744199	0.00761806	0.456756	0.115909	0.863955	0.970506	-0.210971	-0.0431911
181	K437K	7521	100988	0.0744742	6056	92378	0.0655567	0.070214	0.070072	0	0.000821728	1	0.127004	1.06067	0.93367	0.0849819	-0.0990147
182	K437R	30	484	0.0619835	19	502	0.0378486	0.0496957	0.0482178	-2.51692	0.00815214	0.0118387	0.485653	0.882779	0.539046	-0.179875	-0.891519
183	K437D	12	211	0.056872	12	252	0.047619	0.0518359	0.0516327	-1.5463	0.0118852	0.122031	0.178506	0.809981	0.678199	-0.304039	-0.56022
184	K437E	25	341	0.0733138	16	355	0.0450704	0.058908	0.0572023	-1.16559	0.0096998	0.243782	0.479448	1.04415	0.641901	0.0623257	-0.639578
185	K437C	26	400	0.065	29	421	0.0688836	0.0669915	0.0669633	-0.360648	0.00893538	0.718363	0.0579717	0.925741	0.981052	-0.111319	-0.027598
186	K437M	21	432	0.0486111	33	484	0.0681818	0.058952	0.0581263	-1.33133	0.00845921	0.183079	0.331977	0.692328	0.971057	-0.530473	-0.0423716
187	K437N	18	301	0.0598007	16	242	0.0661157	0.0626151	0.0625369	-0.692148	0.0109787	0.488844	0.100855	0.851691	0.941631	-0.231597	-0.0867658
188	K437Q	39	680	0.0573529	39	684	0.0570175	0.0571848	0.0571845	-1.87784	0.00693843	0.0604035	0.00586515	0.816831	0.812054	-0.291891	-0.300353
189	K437S	68	1157	0.0587727	64	1157	0.0553155	0.0570441	0.0570179	-2.46731	0.00533776	0.0136132	0.0606061	0.837051	0.787813	-0.256613	-0.344076
190	K437T	124	2211	0.0560832	124	2191	0.0565952	0.056338	0.0563374	-3.57012	0.0038867	0.000356824	0.00908697	0.798747	0.806038	-0.32419	-0.31108
191	K437A	26	368	0.0706522	24	430	0.055814	0.0626566	0.0622239	-0.833993	0.00906165	0.404285	0.236818	1.00624	0.794912	0.00897523	-0.331133
192	K437I	19	349	0.0544413	15	330	0.0454545	0.0500736	0.0498711	-2.05135	0.00981811	0.0402331	0.17947	0.775362	0.647372	-0.367058	-0.627334
193	K437L	35	498	0.0702811	25	476	0.052521	0.0616016	0.0609557	-1.04962	0.00820524	0.293895	0.288306	1.00096	0.748013	0.00137856	-0.418864
194	K437V	20	474	0.0421941	19	433	0.0438799	0.0429989	0.0429907	-3.20301	0.00849674	0.00136001	0.039206	0.600936	0.624945	-0.734718	-0.678198
195	K437F	23	522	0.0440613	13	342	0.0380117	0.0416667	0.0415593	-3.27955	0.00870465	0.00103972	0.145191	0.627529	0.541369	-0.672247	-0.885315
196	K437W	10	502	0.0199203	17	564	0.0301418	0.0253283	0.0248007	-5.7292	0.00783454	1.00905e-08	0.403561	0.283709	0.429285	-1.81752	-1.21999
197	K437Y	30	505	0.0594059	22	480	0.0458333	0.0527919	0.0523522	-2.13582	0.0081571	0.0326939	0.257097	0.84607	0.652766	-0.241152	-0.615362
198	K437G	18	360	0.05	30	444	0.0675676	0.0597015	0.0590453	-1.16454	0.00902717	0.244205	0.294257	0.712109	0.962309	-0.489831	-0.0554278
199	K437P	22	648	0.0339506	36	745	0.0483221	0.0416368	0.0410048	-4.16504	0.00686122	3.11298e-05	0.345165	0.483531	0.688212	-1.04832	-0.539074
200	E438H	142	1818	0.0781078	138	2015	0.0684864	0.0730498	0.0728924	0.680185	0.00416921	0.496388	0.131711	1.11243	0.975395	0.153708	-0.0359422
201	E438K	26	235	0.110638	30	321	0.0934579	0.100719	0.100367	2.80956	0.0108577	0.00496098	0.170576	1.57573	1.33104	0.65602	0.412559
202	E438R	20	162	0.123457	19	191	0.0994764	0.110482	0.109841	2.95688	0.0136183	0.00310768	0.217053	1.75829	1.41676	0.814176	0.502596
203	E438D	75	846	0.0886525	50	820	0.0609756	0.07503	0.0737381	0.765846	0.00628849	0.443768	0.368877	1.2626	0.868425	0.336402	-0.203526
204	E438E	7521	100988	0.0744742	6056	92378	0.0655567	0.070214	0.070072	0	0.000821728	1	0.127004	1.06067	0.93367	0.0849819	-0.0990147
205	E438C	39	627	0.062201	63	734	0.0858311	0.0749449	0.0739977	0.680537	0.00695171	0.496165	0.3153	0.885877	1.22242	-0.174822	0.289741
206	E438M	22	211	0.104265	15	169	0.0887574	0.0973684	0.0970593	2.06895	0.0131247	0.0385506	0.159271	1.48497	1.2641	0.57043	0.338109
207	E438N	84	1027	0.0817916	97	1090	0.0889908	0.0854983	0.0854225	2.73443	0.00558959	0.00624882	0.0842028	1.16489	1.26742	0.220194	0.341898
208	E438Q	58	554	0.104693	45	494	0.0910931	0.0982824	0.0980464	3.54315	0.00792188	0.000395374	0.138377	1.49106	1.29736	0.576336	0.375583
209	E438S	278	2965	0.0937605	256	2894	0.0884589	0.0911418	0.0911033	6.15176	0.00340193	7.6627e-10	0.0581693	1.33535	1.25985	0.417222	0.333248
210	E438T	28	256	0.109375	12	193	0.0621762	0.0890869	0.0857985	1.56289	0.0120756	0.118078	0.529807	1.55774	0.885524	0.639452	-0.175397
211	E438A	103	1002	0.102794	86	956	0.0899582	0.0965271	0.0963131	4.5262	0.0058135	6.00525e-06	0.132981	1.46402	1.2812	0.549931	0.357495
212	E438I	24	352	0.0681818	15	304	0.0493421	0.0594512	0.0586924	-1.07731	0.0099904	0.281341	0.316894	0.971057	0.702739	-0.0423716	-0.508939
213	E438L	58	958	0.0605428	63	911	0.0691548	0.0647405	0.0645976	-0.921992	0.0059366	0.356533	0.133023	0.862261	0.984914	-0.213803	-0.0219298
214	E438V	35	352	0.0994318	30	413	0.0726392	0.0849673	0.083929	1.59329	0.00925968	0.111096	0.315328	1.41613	1.03454	0.501949	0.0489901
215	E438F	684	21844	0.0313129	1110	42003	0.0264267	0.0280984	0.028006	-38.9254	0.00108196	0	0.173898	0.445964	0.376373	-1.165	-1.40976
216	E438W	42	472	0.0889831	27	424	0.0636792	0.0770089	0.075953	0.79404	0.00855742	0.427172	0.328583	1.26731	0.906931	0.341772	-0.140935
217	E438Y	43	528	0.0814394	37	519	0.0712909	0.0764088	0.07624	0.782219	0.0079195	0.434086	0.132818	1.15987	1.01534	0.213968	0.0219601
218	E438G	19	262	0.0725191	15	235	0.0638298	0.0684105	0.0682721	-0.157165	0.0114754	0.875115	0.127017	1.03283	0.909075	0.046602	-0.137529
219	E438P	48	423	0.113475	44	422	0.104265	0.108876	0.108778	4.38409	0.00881865	1.16473e-05	0.0845898	1.61613	1.48497	0.692546	0.57043
220	N439H	22	228	0.0964912	12	217	0.0552995	0.0764045	0.0735517	0.510461	0.0121273	0.609729	0.539127	1.37424	0.787586	0.458639	-0.344491
221	N439K	70	897	0.0780379	66	720	0.0916667	0.0841064	0.0838364	2.17566	0.00638537	0.0295808	0.162042	1.11143	1.30553	0.152416	0.384638
222	N439R	42	468	0.0897436	27	422	0.063981	0.0775281	0.0764408	0.851842	0.00858621	0.394302	0.3323	1.27814	0.911229	0.35405	-0.134114
223	N439D	15	270	0.0555556	21	281	0.0747331	0.0653358	0.0646258	-0.447567	0.0108995	0.654466	0.293523	0.791232	1.06436	-0.337828	0.0899886
224	N439E	52	624	0.0833333	43	684	0.0628655	0.07263	0.0719131	0.340786	0.00708941	0.733265	0.28181	1.18685	0.895341	0.247135	-0.15949
225	N439C	54	539	0.100186	46	554	0.0830325	0.0914913	0.0910892	2.7432	0.00775638	0.00608432	0.187483	1.42686	1.18256	0.512844	0.241917
226	N439M	25	292	0.0856164	16	325	0.0492308	0.0664506	0.0639691	-0.365313	0.0103019	0.714877	0.54756	1.21936	0.701153	0.286129	-0.512198
227	N439N	7521	100988	0.0744742	6056	92378	0.0655567	0.070214	0.070072	0	0.000821728	1	0.127004	1.06067	0.93367	0.0849819	-0.0990147
228	N439Q	42	601	0.0698835	54	566	0.0954064	0.0822622	0.0812734	1.60525	0.00750552	0.10844	0.310262	0.995293	1.35879	-0.00680629	0.442327
229	N439S	17	233	0.0729614	11	254	0.0433071	0.0574949	0.055583	-1.0974	0.0115903	0.272468	0.515773	1.03913	0.616787	0.0553742	-0.697156
230	N439T	390	4886	0.0798199	306	4356	0.0702479	0.0753084	0.0751559	1.86969	0.00272472	0.0615271	0.127104	1.13681	1.00048	0.18499	0.000697075
231	N439A	76	900	0.0844444	53	796	0.0665829	0.0760613	0.0755321	0.938048	0.0062335	0.34822	0.234831	1.20267	0.948285	0.266244	-0.0766067
232	N439I	50	599	0.0834725	25	426	0.0586854	0.0731707	0.0721024	0.369469	0.00800265	0.711778	0.338756	1.18883	0.835808	0.249541	-0.258756
233	N439L	50	727	0.0687758	49	852	0.0575117	0.0626979	0.0624484	-1.16463	0.00645363	0.244169	0.179656	0.979517	0.819092	-0.0298579	-0.287902
234	N439V	33	361	0.0914127	32	478	0.0669456	0.0774732	0.0765476	0.820986	0.00884203	0.411654	0.315814	1.30192	0.953451	0.380637	-0.0687693
235	N439F	50	686	0.0728863	50	640	0.078125	0.0754148	0.0753694	0.738502	0.00704234	0.460209	0.0694652	1.03806	1.11267	0.0538889	0.154026
236	N439W	30	253	0.118577	23	278	0.0827338	0.0998117	0.0982114	2.66425	0.0111092	0.00771609	0.359109	1.6888	1.17831	0.755994	0.236718
237	N439Y	35	445	0.0786517	41	448	0.0915179	0.0851064	0.0848628	1.73696	0.00857381	0.0823938	0.151178	1.12017	1.30341	0.163719	0.382295
238	N439G	18	226	0.079646	17	247	0.0688259	0.0739958	0.073799	0.321489	0.0117633	0.74784	0.146226	1.13433	0.980231	0.181844	-0.0288069
[truncated: 3,221 more rows]

## Sheet: 1e
AA_position	mutability_score
340	0.701758
341	0.293997
342	0.548264
343	0.55178
344	0.495766
345	0.499386
346	0.504692
347	0.378532
348	0.529091
349	0.358115
350	0.699377
351	0.17928
352	0.209116
353	0.100275
354	0.0425224
355	0.116118
356	0.11828
357	0.130021
358	0.25355
359	0.519861
360	0.436396
361	0.607958
362	0.71653
363	0.529347
364	0.422605
365	0.891094
366	0.432833
367	0.385559
368	0.157194
369	0.0870534
370	0.199274
371	0.186322
372	0.160005
373	0.062731
374	0.0453369
375	0.128778
376	0.104685
377	0.279379
378	0.183146
379	0.439562
380	0.180177
381	0.579258
382	0.429571
383	0.318915
384	0.314955
385	0.616073
386	0.551776
387	0.0472102
388	0.562341
389	0.302849
390	0.134232
391	0.325525
392	0.0427006
393	0.284469
394	0.050926
395	0.0603176
396	0.0479249
397	0.175353
398	0.193831
399	0.207633
400	0.0668936
401	0.0393549
402	0.193772
403	0.244271
404	0.27912
405	0.3271
406	0.125312
407	0.197102
408	0.109675
409	0.544654
410	0.204368
411	0.14814
412	0.286879
413	0.544767
414	0.560437
415	0.437752
416	0.566789
417	0.566046
418	0.489942
419	1
420	0.92744
421	0.616917
422	0.497591
423	0.491602
424	0.383034
425	0.172522
426	0.156691
427	0.548108
428	0.498
429	0.312978
430	0.6573
431	0.470115
432	0.530148
433	0.343241
434	0.36132
435	0.425713
436	0.328854
437	0.405026
438	0.617933
439	0.571783
440	0.41527
441	0.480355
442	0.238642
443	0.295399
444	0.275904
445	0.235276
446	0.288221
447	0.297996
448	0.322342
449	0.382538
450	0.211644
451	0.225718
452	0.234172
453	0.234735
454	0.284103
455	0.254395
456	0.311946
457	0.235261
458	0.473042
459	0.484246
460	0.532136
461	0.536776
462	0.60215
463	0.584367
464	nan
465	nan
466	nan
467	nan
468	nan
469	0.283536
470	0.336738
471	0.235549
472	0.308515
473	0.337241
474	0.255422
475	0.345316
476	0.345284
477	0.230477
478	0.253267
479	0.445338
480	0.279446
481	0.235978
482	0.401081
483	0.256722
484	0.244886
485	0.242451
486	0.422951
487	0.213499
488	0.467332
489	0.223334
490	0.275248
491	0.274721
492	0.329159
493	0.461725
494	0.489796
495	0.534206
496	0.572446
497	0.562628
498	0.53027
499	0.612433
500	0.401252
501	0.446061
502	0.338576
503	0.410322
504	0.337286
505	0.392157
506	0.386651
507	0.441422
508	0.346644
509	0.56457
510	0.21373
511	0.371552
512	0.382405
513	0.329424
514	0.172836
515	0.19069
516	0.133852
517	0.150508
518	0.123218
519	0.11527
520	0.244064
521	0.328778
522	0.22024
523	0.143965
524	0.137419
525	0.287424
526	0.263565
527	0.114571
528	0.313739
529	0.164162
530	0.110012
531	0.182706
532	0.167549
533	0.207922
534	0.193951
535	0.441543
536	0.263817
537	0.300538
538	0.192992
539	0.104426
540	0.217131
541	0.16027
542	0.239397
543	0.502544
544	0.279345
545	0.245181
546	0.34906
547	0.311841
548	0.149049
549	0.306409
550	0.458134
551	0.263706
552	0.467389
553	0.611457
554	0.625436
555	0.136161
556	0.399548
557	0.588394
558	0.120463
559	0.14972
560	0.306877
561	0.333845
562	0.498162
563	0.11369
564	0.278602
565	0.59213
566	0.577502
567	0.239409
568	0.727193
569	0.735687
570	0.186619
571	0.146114
572	0.619355
573	0.596412
574	0.189582
575	0.580047
576	0.416965
577	0.452985
578	0.46546
579	0.203738
580	0.624675
581	0.400735
582	0.496524
583	0.594808
584	0.458197
585	0.485924
586	0.383468
587	0.551355
588	0.322442
589	0.518897
590	0.22889
591	0.503805
592	0.407159
593	0.404257
594	0.324688
595	0.343922
596	0.428867
597	0.604243
598	0.496584
599	0.218531
600	0.340938

## Sheet: 1f
	rep1_edits	rep1_counts	rep1_rate	rep2_edits	rep2_counts	rep2_rate	mean_rate	geom_rate	z-score	std_err	p-value	rep_diverge
D340H	20	469	0.0426439	25	508	0.0492126	0.0460594	0.0459419	1.49027	0.00842412	0.136153	0.142613
D340K	20	260	0.0769231	18	274	0.0656934	0.071161	0.07094	3.46268	0.0108748	0.000534829	0.157806
D340R	78	1631	0.0478234	117	1960	0.0596939	0.0543024	0.0539754	2.85063	0.00729568	0.0043633	0.218599
D340D	10538	355743	0.0296225	13682	539009	0.0253836	0.027069	0.026991	-1.35202	0.00476045	0.17637	0.156596
D340E	44	962	0.045738	57	1447	0.0393918	0.0419261	0.041813	1.21583	0.00692611	0.224051	0.151366
D340C	29	617	0.0470016	29	874	0.0331808	0.0389001	0.0383236	0.735184	0.00733818	0.462228	0.355291
D340M	25	478	0.0523013	29	591	0.0490694	0.0505145	0.050489	2.00978	0.00846328	0.0444543	0.0639793
D340N	10	485	0.0206186	29	679	0.0427099	0.0335052	0.0315318	0	0.00745923	1	0.659341
D340Q	4	198	0.020202	3	260	0.0115385	0.0152838	0.0146997	-1.99002	0.00915635	0.0465888	0.566844
D340S	4	168	0.0238095	5	171	0.0292398	0.0265487	0.0264093	-0.641052	0.0108517	0.521489	0.204539
D340T	27	532	0.0507519	27	654	0.0412844	0.0455312	0.0452905	1.49509	0.00804367	0.13489	0.207934
D340A	20	483	0.0414079	33	562	0.0587189	0.0507177	0.0499648	2.02173	0.00851377	0.0432042	0.341321
D340I	26	554	0.0469314	21	616	0.0340909	0.0401709	0.0396618	0.85472	0.0077988	0.392706	0.319646
D340L	6	113	0.0530973	6	157	0.0382166	0.0444444	0.0438556	0.874432	0.0125102	0.381883	0.334818
D340V	44	937	0.0469584	56	1192	0.0469799	0.0469704	0.0469704	1.83712	0.00732956	0.0661928	0.000457479
D340F	10	280	0.0357143	18	329	0.0547112	0.045977	0.0449688	1.30781	0.00953646	0.190939	0.413184
D340W	3	166	0.0180723	10	148	0.0675676	0.0414013	0.0336481	0.673955	0.0117161	0.50034	1.1955
D340Y	27	480	0.05625	27	479	0.0563674	0.0563087	0.0563086	2.55489	0.00892542	0.010622	0.00208551
D340G	20	392	0.0510204	28	502	0.0557769	0.0536913	0.053639	2.25589	0.00894819	0.0240775	0.0885895
D340P	2	325	0.00615385	5	361	0.0138504	0.0102041	0.00943081	-3.10887	0.00749502	0.00187802	0.754264
N341H	16	548	0.0291971	19	726	0.0261708	0.0274725	0.0274321	-0.867251	0.00695603	0.385804	0.110157
N341K	11	144	0.0763889	3	198	0.0151515	0.0409357	0.0299417	0.655617	0.0113336	0.51207	1.49594
N341R	6	131	0.0458015	9	157	0.0573248	0.0520833	0.051762	1.49179	0.0124536	0.135753	0.221248
N341D	49	1042	0.047025	41	1276	0.0321317	0.0388266	0.0381314	0.784266	0.00678522	0.432884	0.383585
N341E	18	576	0.03125	30	883	0.0339751	0.0328992	0.032872	-0.0860946	0.0070377	0.931391	0.0828312
N341C	2	80	0.025	2	136	0.0147059	0.0185185	0.0178996	-1.16425	0.0128723	0.244322	0.555882
N341M	7	245	0.0285714	11	244	0.045082	0.0368098	0.0358728	0.336078	0.00983301	0.736812	0.448536
N341N	10538	355743	0.0296225	13682	539009	0.0253836	0.027069	0.026991	-1.35202	0.00476045	0.17637	0.156596
N341Q	35	1180	0.029661	52	1362	0.0381791	0.034225	0.0339571	0.112238	0.00641372	0.910634	0.248886
N341S	16	443	0.0361174	16	492	0.0325203	0.0342246	0.0341776	0.0906197	0.00793916	0.927795	0.105101
N341T	10	467	0.0214133	8	644	0.0124224	0.0162016	0.0156173	-2.63962	0.00655532	0.00829999	0.554939
N341A	8	413	0.0193705	17	585	0.0290598	0.0250501	0.0245695	-1.15636	0.00731178	0.247534	0.3868
N341I	5	616	0.00811688	11	788	0.0139594	0.011396	0.011004	-3.85258	0.00573879	0.000116879	0.51268
N341L	19	1005	0.0189055	15	1121	0.0133809	0.0159925	0.0157558	-3.26078	0.0053707	0.00111106	0.345448
N341V	14	769	0.0182055	31	947	0.032735	0.0262238	0.0251665	-1.13956	0.00638965	0.25447	0.554058
N341F	1	92	0.0108696	3	148	0.0202703	0.0166667	0.0159629	-1.3785	0.0122151	0.16805	0.564042
N341W	6	289	0.0207612	5	399	0.0125313	0.0159884	0.0154916	-2.24741	0.00779419	0.0246136	0.514744
N341Y	7	516	0.0135659	13	703	0.0184922	0.0164069	0.0162195	-2.68502	0.00636801	0.00725244	0.300257
N341G	4	286	0.013986	14	378	0.037037	0.0271084	0.0243481	-0.756762	0.00845275	0.449192	0.850327
N341P	20	890	0.0224719	20	1035	0.0193237	0.0207792	0.0207203	-2.17117	0.00586133	0.0299184	0.151509
F342H	7	209	0.0334928	11	276	0.0398551	0.0371134	0.0369773	0.365464	0.00987305	0.714765	0.171427
F342K	1	81	0.0123457	1	113	0.00884956	0.0103093	0.0101693	-1.74805	0.0132696	0.0804558	0.339124
F342R	26	871	0.0298507	27	1124	0.0240214	0.0265664	0.0264115	-1.1188	0.00620195	0.263225	0.219427
F342D	15	307	0.0488599	14	413	0.0338983	0.0402778	0.0396167	0.765822	0.0088436	0.443782	0.371461
F342E	8	128	0.0625	7	191	0.0366492	0.0470219	0.0454027	1.14183	0.0118378	0.253523	0.54976
F342C	22	580	0.037931	35	946	0.0369979	0.0373526	0.0373498	0.532938	0.00721923	0.594076	0.0249822
F342M	14	440	0.0318182	23	639	0.0359937	0.034291	0.0342286	0.10278	0.007646	0.918138	0.121768
F342N	13	421	0.0308789	7	506	0.013834	0.021575	0.0199213	-1.63664	0.00728945	0.101706	0.79003
F342Q	15	562	0.0266904	15	620	0.0241935	0.0253807	0.0253502	-1.16449	0.00697681	0.244224	0.0983756
F342S	31	981	0.0316004	47	1096	0.0428832	0.0375542	0.0371245	0.592836	0.0068299	0.553291	0.300441
F342T	15	573	0.026178	32	705	0.0453901	0.0367762	0.0354644	0.437992	0.00746831	0.661392	0.522405
F342A	33	1064	0.031015	48	1335	0.0359551	0.0337641	0.0336738	0.0401787	0.00644406	0.967951	0.14631
F342I	35	1061	0.0329877	25	1341	0.0186428	0.0249792	0.0239876	-1.45313	0.00586733	0.146189	0.574276
F342L	6	275	0.0218182	7	333	0.021021	0.0213816	0.0213779	-1.43557	0.00844512	0.151124	0.0372826
F342V	25	699	0.0357654	31	871	0.0355913	0.0356688	0.0356687	0.305442	0.00708363	0.76003	0.00488115
F342F	10538	355743	0.0296225	13682	539009	0.0253836	0.027069	0.026991	-1.35202	0.00476045	0.17637	0.156596
F342W	9	373	0.0241287	14	466	0.0300429	0.0274136	0.027253	-0.776638	0.00784351	0.437373	0.215741
F342Y	28	1069	0.0261927	54	1390	0.0388489	0.0333469	0.0327306	-0.0247586	0.00639235	0.980248	0.379532
F342G	15	468	0.0320513	32	635	0.0503937	0.0426111	0.04159	1.13432	0.00802762	0.25666	0.430461
F342P	13	722	0.0180055	15	991	0.0151362	0.0163456	0.0162852	-2.9953	0.00572882	0.00274172	0.175541
S343H	22	871	0.0252583	47	1124	0.0418149	0.0345865	0.0335544	0.161339	0.00670209	0.871826	0.478702
S343K	26	712	0.0365169	20	798	0.0250627	0.0304636	0.0299299	-0.444497	0.00684274	0.656683	0.375996
S343R	23	690	0.0333333	47	802	0.0586035	0.0469169	0.0451438	1.72875	0.00775805	0.0838538	0.538615
S343D	5	142	0.0352113	10	155	0.0645161	0.0505051	0.0482982	1.38606	0.0122649	0.165728	0.580236
S343E	19	454	0.0418502	13	595	0.0218487	0.0305052	0.0289462	-0.399875	0.00750212	0.689248	0.655674
S343C	14	191	0.0732984	11	294	0.037415	0.0515464	0.0487594	1.7283	0.0104387	0.0839343	0.696139
S343M	40	1447	0.0276434	73	1812	0.040287	0.0346732	0.034083	0.187782	0.00622027	0.851047	0.36465
S343N	34	1064	0.0319549	40	1377	0.0290487	0.0303154	0.0302815	-0.513911	0.00620674	0.607314	0.0958663
S343Q	37	734	0.0504087	56	896	0.0625	0.0570552	0.0567326	2.89257	0.00814156	0.00382099	0.211922
S343S	10538	355743	0.0296225	13682	539009	0.0253836	0.027069	0.026991	-1.35202	0.00476045	0.17637	0.156596
S343T	14	297	0.047138	15	416	0.0360577	0.0406732	0.0403156	0.806643	0.00888629	0.419872	0.272424
S343A	42	874	0.0480549	23	879	0.0261661	0.0370793	0.0354292	0.509807	0.00701077	0.610187	0.590325
S343I	38	1089	0.0348944	41	1297	0.0316114	0.0331098	0.0330696	-0.0616865	0.00640898	0.950812	0.0991545
S343L	45	834	0.0539568	33	988	0.0334008	0.0428101	0.0416006	1.27806	0.00728052	0.201228	0.480168
S343V	17	533	0.0318949	22	664	0.0331325	0.0325815	0.0325756	-0.125546	0.00735747	0.900091	0.0379847
S343F	17	475	0.0357895	12	441	0.0272109	0.0316594	0.0313659	-0.234998	0.00785439	0.81421	0.270965
S343W	5	196	0.0255102	7	281	0.024911	0.0251572	0.0251555	-0.884881	0.00943395	0.376221	0.0238171
S343Y	12	352	0.0340909	17	371	0.0458221	0.0401107	0.0396775	0.748456	0.0088255	0.454185	0.292471
S343G	78	1812	0.0430464	77	2446	0.03148	0.0364021	0.035964	0.471548	0.00614341	0.63725	0.31774
S343P	15	996	0.0150602	28	1235	0.0226721	0.0192739	0.0188876	-2.56373	0.005551	0.0103553	0.39493
S344H	13	442	0.0294118	14	556	0.0251799	0.0270541	0.0269733	-0.869225	0.00742161	0.384724	0.156424
S344K	5	257	0.0194553	6	354	0.0169492	0.0180033	0.0179613	-1.87543	0.00826577	0.0607334	0.139202
S344R	44	1010	0.0435644	25	1466	0.0170532	0.0278675	0.0250012	-0.934925	0.00603003	0.349827	0.951328
S344D	27	740	0.0364865	37	817	0.0452876	0.0411047	0.0408673	1.02771	0.00739466	0.304088	0.214116
S344E	8	245	0.0326531	7	359	0.0194986	0.0248344	0.0240343	-1.00482	0.00862911	0.314983	0.529686
S344C	9	337	0.0267062	18	459	0.0392157	0.0339196	0.033329	0.0499533	0.00829661	0.96016	0.368797
S344M	27	654	0.0412844	30	919	0.0326442	0.0362365	0.035992	0.384002	0.00711282	0.700977	0.23844
S344N	12	446	0.0269058	27	588	0.0459184	0.0377176	0.0364633	0.532807	0.00790614	0.594167	0.504076
S344Q	11	447	0.0246085	7	542	0.0129151	0.0182002	0.017284	-2.20443	0.00694283	0.0274944	0.642486
S344S	10538	355743	0.0296225	13682	539009	0.0253836	0.027069	0.026991	-1.35202	0.00476045	0.17637	0.156596
S344T	26	739	0.0351827	40	934	0.0428266	0.0394501	0.0392642	0.825023	0.00720578	0.409358	0.193761
S344A	5	269	0.0185874	11	379	0.0290237	0.0246914	0.0241219	-1.04819	0.00840861	0.294552	0.422674
S344I	23	843	0.0272835	46	1023	0.0449658	0.0369775	0.0358803	0.501445	0.00692466	0.616058	0.47819
S344L	21	738	0.0284553	28	683	0.0409956	0.0344828	0.0339142	0.136369	0.00716881	0.891529	0.363669
S344V	33	606	0.0544554	19	741	0.025641	0.0386043	0.0359829	0.681794	0.00747902	0.495369	0.746404
S344F	11	311	0.0353698	13	345	0.0376812	0.0365854	0.0365671	0.345135	0.00892467	0.729993	0.0631778
S344W	19	745	0.0255034	27	906	0.0298013	0.0278619	0.0277789	-0.861644	0.0065494	0.388883	0.15426
S344Y	7	239	0.0292887	6	332	0.0180723	0.0227671	0.0221198	-1.23261	0.00871163	0.21772	0.492659
S344G	16	590	0.0271186	36	788	0.0456853	0.0377358	0.0365422	0.572016	0.00739611	0.567311	0.492016
S344P	17	759	0.0223979	14	895	0.0156425	0.0187424	0.0184436	-2.47927	0.00595446	0.0131652	0.360435
P345H	33	779	0.042362	26	1053	0.0246914	0.0322052	0.031062	-0.194968	0.00666733	0.845418	0.548688
P345K	16	566	0.0282686	18	734	0.0245232	0.0261538	0.0260886	-1.07444	0.00684199	0.282626	0.143206
P345R	29	1128	0.0257092	31	1526	0.0203145	0.0226074	0.0224532	-1.95053	0.00558709	0.0511134	0.238624
P345D	10	310	0.0322581	15	388	0.0386598	0.0358166	0.0356732	0.265031	0.00872149	0.790986	0.178736
P345E	12	294	0.0408163	8	385	0.0207792	0.0294551	0.0278345	-0.476446	0.0085006	0.633757	0.68026
P345C	19	561	0.0338681	27	811	0.0332922	0.0335277	0.0335265	0.00314299	0.00717221	0.997492	0.0171757
P345M	25	612	0.0408497	23	669	0.0343797	0.0374707	0.0373318	0.528646	0.00750138	0.597051	0.172668
P345N	22	789	0.0278834	29	895	0.0324022	0.030285	0.0302004	-0.482915	0.00666808	0.629156	0.14921
P345Q	13	538	0.0241636	28	645	0.0434109	0.0346577	0.0332573	0.153849	0.0074911	0.877729	0.555355
P345S	34	753	0.0451527	26	900	0.0288889	0.0362976	0.0354065	0.396328	0.00704589	0.691863	0.448069
P345T	17	232	0.0732759	7	283	0.024735	0.0466019	0.0403444	1.3022	0.0100574	0.192846	1.04161
P345A	27	794	0.034005	48	1140	0.0421053	0.0387797	0.0385692	0.755233	0.00698403	0.450109	0.208878
P345I	20	555	0.036036	41	759	0.0540184	0.0464231	0.0455288	1.63085	0.00792102	0.102922	0.387359
P345L	30	553	0.0542495	22	704	0.03125	0.0413683	0.0398323	1.01635	0.00773672	0.309465	0.55597
P345V	6	178	0.0337079	5	228	0.0219298	0.0270936	0.0264781	-0.633499	0.0101209	0.526408	0.434717
P345F	20	530	0.0377358	21	608	0.0345395	0.0360281	0.035993	0.330441	0.00763514	0.741066	0.0887189
P345W	10	547	0.0182815	17	643	0.0264386	0.0226891	0.0223146	-1.58936	0.00680529	0.111978	0.359514
P345Y	9	274	0.0328467	11	341	0.0322581	0.0325203	0.032519	-0.110325	0.00892664	0.912152	0.018101
P345G	62	2056	0.0301556	62	2518	0.0246227	0.0271098	0.0269716	-1.17262	0.00545395	0.240949	0.204094
P345P	10538	355743	0.0296225	13682	539009	0.0253836	0.027069	0.026991	-1.35202	0.00476045	0.17637	0.156596
H346H	10538	355743	0.0296225	13682	539009	0.0253836	0.027069	0.026991	-1.35202	0.00476045	0.17637	0.156596
H346K	10	689	0.0145138	31	961	0.0322581	0.0248485	0.02311	-1.36078	0.00636156	0.173584	0.714099
H346R	21	759	0.027668	12	877	0.013683	0.0201711	0.0189693	-2.19695	0.00606934	0.0280243	0.693316
H346D	14	528	0.0265152	31	617	0.0502431	0.0393013	0.0374174	0.743749	0.00779316	0.457028	0.603745
H346E	41	1400	0.0292857	61	1722	0.0354239	0.0326714	0.0325266	-0.136114	0.00612566	0.891731	0.187877
H346C	82	2530	0.0324111	87	3080	0.0282468	0.0301248	0.0300541	-0.608364	0.0055565	0.542946	0.138236
H346M	14	590	0.0237288	24	835	0.0287425	0.0266667	0.0265495	-1.01895	0.00671128	0.308224	0.188014
H346N	31	975	0.0317949	44	1100	0.04	0.0361446	0.0359097	0.391131	0.00674818	0.6957	0.227009
H346Q	23	777	0.029601	37	1037	0.0356798	0.0330761	0.0329365	-0.0637319	0.00673257	0.949184	0.183783
H346S	7	163	0.0429448	12	276	0.0434783	0.0432802	0.0432794	0.934577	0.0104593	0.350006	0.0123261
H346T	14	446	0.0313901	14	579	0.0241796	0.0273171	0.0270874	-0.838701	0.00737817	0.401637	0.263956
H346A	47	1101	0.0426885	57	1400	0.0407143	0.0415834	0.0415719	1.17577	0.00687056	0.239686	0.0474752
H346I	13	427	0.030445	21	565	0.0371681	0.0342742	0.0341091	0.0984009	0.00781537	0.921614	0.196159
H346L	55	1378	0.0399129	46	1649	0.0278957	0.0333664	0.0328368	-0.0223944	0.00619732	0.982133	0.36016
H346V	39	1035	0.0376812	43	1280	0.0335937	0.0354212	0.0353633	0.291034	0.00658345	0.771025	0.115395
H346F	21	733	0.0286494	33	856	0.0385514	0.0339836	0.0336177	0.0686476	0.00697013	0.94527	0.291376
H346W	20	427	0.0468384	13	598	0.0217391	0.0321951	0.0299306	-0.171481	0.00763951	0.863845	0.779599
H346Y	32	605	0.0528926	25	810	0.0308642	0.0402827	0.0388578	0.904749	0.00749107	0.365599	0.546844
H346G	22	715	0.0307692	19	925	0.0205405	0.025	0.0244978	-1.33297	0.00638059	0.182541	0.409148
H346P	26	1203	0.0216126	48	1423	0.0337316	0.0281797	0.0275087	-0.889223	0.00598884	0.373883	0.430058
A347H	8	219	0.0365297	6	316	0.0189873	0.0261682	0.0248195	-0.808	0.00908035	0.41909	0.670368
A347K	22	1094	0.0201097	17	1103	0.0154125	0.0177515	0.0175955	-2.88619	0.00545829	0.00389937	0.264608
A347R	23	1110	0.0207207	17	1280	0.0132812	0.0167364	0.0163287	-3.18232	0.00526935	0.001461	0.444508
A347D	5	322	0.015528	5	323	0.0154799	0.0155039	0.0155039	-2.25904	0.00796854	0.0238807	0.00310078
A347E	23	620	0.0370968	31	619	0.0500808	0.0435835	0.0430974	1.28007	0.00787333	0.200522	0.297911
A347C	16	586	0.0273038	26	902	0.0288248	0.0282258	0.0282159	-0.784064	0.00673331	0.433003	0.0538897
A347M	12	296	0.0405405	15	399	0.037594	0.0388489	0.0388218	0.602412	0.00887061	0.5469	0.0758465
A347N	9	722	0.0124654	25	786	0.0318066	0.0225464	0.0203116	-1.72302	0.00636018	0.0848842	0.857841
A347Q	51	1218	0.0418719	53	1592	0.0332915	0.0370107	0.0367706	0.539973	0.00649203	0.589216	0.231838
A347S	30	765	0.0392157	23	809	0.0284302	0.0336722	0.0332405	0.0239757	0.00696616	0.980872	0.32031
A347T	13	546	0.0238095	24	1060	0.0226415	0.0230386	0.023032	-1.66451	0.00628806	0.09601	0.0506981
A347A	10538	355743	0.0296225	13682	539009	0.0253836	0.027069	0.026991	-1.35202	0.00476045	0.17637	0.156596
A347I	71	1810	0.0392265	58	2053	0.0282513	0.0333937	0.0329478	-0.0185407	0.00600945	0.985208	0.32866
A347L	27	892	0.0302691	28	1054	0.0265655	0.0282631	0.0282032	-0.826323	0.00634383	0.408621	0.13104
A347V	60	1964	0.0305499	82	2555	0.0320939	0.0314229	0.0314135	-0.360765	0.00577182	0.718275	0.0491373
A347F	9	399	0.0225564	14	288	0.0486111	0.0334789	0.0311217	-0.00303366	0.00865651	0.997579	0.778243
A347W	25	967	0.0258532	16	1125	0.0142222	0.0195985	0.0187473	-2.45662	0.0056609	0.0140251	0.593461
A347Y	5	234	0.0213675	5	258	0.0193798	0.0203252	0.020301	-1.44643	0.00911206	0.148057	0.0977937
A347G	27	961	0.0280957	28	1168	0.0239726	0.0258337	0.025753	-1.26376	0.00607031	0.206315	0.159603
A347P	14	687	0.0203785	13	772	0.0168394	0.0185058	0.0184219	-2.4369	0.00615508	0.0148138	0.191241
R348H	3	124	0.0241935	10	173	0.0578035	0.043771	0.0401818	0.852352	0.0120442	0.394018	0.767857
R348K	5	193	0.0259067	3	264	0.0113636	0.0175055	0.016094	-1.72737	0.00926244	0.0841006	0.830775
R348R	10538	355743	0.0296225	13682	539009	0.0253836	0.027069	0.026991	-1.35202	0.00476045	0.17637	0.156596
R348D	6	318	0.0188679	18	417	0.0431655	0.0326531	0.0301742	-0.100986	0.0084377	0.919561	0.744112
R348E	21	358	0.0586592	12	363	0.0330579	0.0457698	0.0439483	1.35017	0.00908375	0.176962	0.559351
R348C	22	717	0.0306834	36	832	0.0432692	0.0374435	0.0369048	0.546811	0.00720241	0.584508	0.336128
R348M	40	694	0.0576369	41	976	0.0420082	0.048503	0.0479092	1.9506	0.00768884	0.0511049	0.322221
R348N	46	820	0.0560976	59	1032	0.0571705	0.0566955	0.056693	2.90767	0.00797555	0.00364128	0.0189254
R348Q	25	855	0.0292398	60	1164	0.0515464	0.0421	0.0405441	1.20699	0.00712094	0.227437	0.529848
R348S	39	866	0.0450346	44	1000	0.044	0.0444802	0.0444772	1.4948	0.00734215	0.134968	0.0232607
R348T	11	455	0.0241758	12	514	0.0233463	0.0237358	0.0237322	-1.33725	0.00730554	0.18114	0.0349481
R348A	18	317	0.0567823	24	491	0.0488798	0.0519802	0.0518399	2.03298	0.00908767	0.0420547	0.152029
R348I	20	529	0.0378072	38	712	0.0533708	0.0467365	0.0460764	1.64824	0.00802757	0.0993036	0.333007
R348L	54	955	0.0565445	45	1107	0.0406504	0.0480116	0.0473636	1.95541	0.00741866	0.0505351	0.331047
R348V	12	392	0.0306122	18	425	0.0423529	0.0367197	0.0362441	0.384133	0.00836833	0.70088	0.319738
R348F	16	378	0.042328	28	580	0.0482759	0.045929	0.0458352	1.46906	0.00845699	0.141815	0.1295
R348W	24	628	0.0382166	29	695	0.0417266	0.0400605	0.040022	0.864253	0.00758494	0.387449	0.087619
R348Y	38	823	0.0461725	36	933	0.0385852	0.0421412	0.0419721	1.18464	0.00729005	0.23616	0.180045
R348G	26	744	0.0349462	31	722	0.0429363	0.0388813	0.038676	0.730221	0.00736237	0.465255	0.205499
R348P	13	474	0.0274262	31	651	0.047619	0.0391111	0.0377418	0.717271	0.00781567	0.473207	0.516295
R349H	21	607	0.0345964	25	806	0.0310174	0.0325548	0.0325071	-0.134427	0.00706934	0.893065	0.109938
R349K	26	733	0.0354707	27	874	0.0308924	0.0329807	0.0329024	-0.0760541	0.00689569	0.939376	0.138815
R349R	10538	355743	0.0296225	13682	539009	0.0253836	0.027069	0.026991	-1.35202	0.00476045	0.17637	0.156596
R349D	3	251	0.0119522	1	226	0.00442478	0.00838574	0.00746412	-2.89252	0.00868426	0.00382161	0.897644
R349E	5	690	0.00724638	27	1005	0.0268657	0.0188791	0.0157593	-2.469	0.00592389	0.0135491	1.03921
R349C	8	488	0.0163934	22	788	0.0279188	0.023511	0.0227754	-1.48749	0.00671883	0.136886	0.490211
R349M	12	237	0.0506329	16	340	0.0470588	0.0485269	0.0484953	1.5338	0.0097938	0.12508	0.0736517
R349N	25	791	0.0316056	39	909	0.0429043	0.0376471	0.0372168	0.584703	0.00708377	0.558747	0.300122
R349Q	17	591	0.0287648	31	863	0.0359212	0.0330124	0.0328195	-0.0699015	0.00704956	0.944272	0.216779
R349S	15	402	0.0373134	5	552	0.00905797	0.0209644	0.016448	-1.74496	0.00718688	0.0809925	1.34779
R349T	25	1342	0.0186289	33	1770	0.0186441	0.0186375	0.0186375	-2.90626	0.00511572	0.00365776	0.000813183
R349A	26	983	0.0264496	46	1167	0.0394173	0.0334884	0.0328449	-0.00256324	0.00654739	0.997955	0.387229
R349I	5	468	0.0106838	6	502	0.0119522	0.0113402	0.0113224	-3.37049	0.00657619	0.000750359	0.111853
R349L	9	144	0.0625	3	262	0.0114504	0.0295567	0.0209045	-0.386419	0.0102182	0.699187	1.72718
R349V	9	592	0.0152027	11	731	0.0150479	0.0151172	0.015117	-3.00662	0.00611584	0.00264171	0.0102415
R349F	35	1039	0.0336862	47	1465	0.0320819	0.0327476	0.0327381	-0.119563	0.006336	0.904829	0.0489906
R349W	11	193	0.0569948	10	321	0.0311526	0.040856	0.0390841	0.747529	0.00983356	0.454744	0.632518
R349Y	20	632	0.0316456	34	999	0.034034	0.0331085	0.0330878	-0.0576366	0.00688161	0.954038	0.0721405
R349G	21	606	0.0346535	14	941	0.0148778	0.0226244	0.0207197	-1.72097	0.00632244	0.0852564	0.874085
R349P	8	246	0.0325203	7	265	0.0264151	0.0293542	0.0291961	-0.442846	0.00937333	0.657877	0.207985
K350H	9	318	0.0283019	6	327	0.0183486	0.0232558	0.0227194	-1.22698	0.00835333	0.219832	0.42799
K350K	10538	355743	0.0296225	13682	539009	0.0253836	0.027069	0.026991	-1.35202	0.00476045	0.17637	0.156596
K350R	9	473	0.0190275	20	706	0.0283286	0.0245971	0.0241481	-1.28427	0.00693626	0.199047	0.378139
K350D	4	362	0.0110497	5	558	0.00896057	0.00978261	0.0097308	-3.58485	0.00661744	0.000337271	0.213558
K350E	12	907	0.0132304	17	1547	0.010989	0.0118174	0.0117694	-4.48738	0.00483304	7.21032e-06	0.18967
K350C	33	866	0.0381062	43	1171	0.0367208	0.0373098	0.0373035	0.556389	0.00683805	0.577945	0.0371346
K350M	43	490	0.0877551	42	682	0.0615836	0.0725256	0.0714118	4.20596	0.00927741	2.59972e-05	0.360859
K350N	28	568	0.0492958	17	704	0.0241477	0.0353774	0.0332104	0.252961	0.00740116	0.800298	0.710851
K350Q	25	764	0.0327225	34	918	0.037037	0.0350773	0.0350109	0.226139	0.00695208	0.821093	0.123
K350S	9	219	0.0410959	28	272	0.102941	0.0753564	0.0683466	3.71558	0.0112637	0.000202736	0.820704
K350T	45	731	0.0615595	40	975	0.0410256	0.0498242	0.0488171	2.11125	0.00772955	0.034751	0.412127
K350A	6	175	0.0342857	13	351	0.037037	0.0361217	0.036098	0.273566	0.00956448	0.784418	0.0761682
K350I	11	334	0.0329341	15	346	0.0433526	0.0382353	0.0378777	0.531423	0.00890089	0.595125	0.272483
K350L	9	128	0.0703125	4	241	0.0165975	0.0352304	0.0273864	0.159522	0.0108148	0.873258	1.52468
K350V	42	978	0.0429448	71	1362	0.0521292	0.0482906	0.0480731	2.02361	0.00730647	0.0430102	0.190191
K350F	42	726	0.0578512	29	974	0.0297741	0.0417647	0.0395398	1.12971	0.00731124	0.2586	0.672269
K350W	16	560	0.0285714	19	878	0.0216401	0.0243394	0.0241131	-1.39854	0.00655382	0.161951	0.284779
K350Y	23	488	0.0471311	24	547	0.0438757	0.0454106	0.0453816	1.4375	0.00828209	0.150577	0.0716894
K350G	31	475	0.0652632	33	594	0.0555556	0.059869	0.0596767	2.96695	0.00888584	0.00300767	0.162147
K350P	12	366	0.0327869	11	463	0.0237581	0.0277443	0.0273887	-0.730146	0.00789005	0.465301	0.325429
V351H	3	557	0.005386	9	796	0.0113065	0.00886918	0.00833188	-4.37376	0.00563267	1.22124e-05	0.66754
V351K	1	253	0.00395257	5	322	0.015528	0.0104348	0.00850454	-2.8507	0.00809287	0.00436228	1.10931
V351R	0	256	0	1	314	0.00318471	0.00175439	0	-4.1372	0.00767447	3.51577e-05	1.81529
V351D	5	904	0.00553097	13	966	0.0134576	0.00962567	0.00875559	-4.71089	0.00506899	2.46634e-06	0.823484
V351E	8	266	0.0300752	5	274	0.0182482	0.0240741	0.0233403	-1.05308	0.00895568	0.292303	0.491276
V351C	7	377	0.0185676	19	527	0.0360531	0.0287611	0.0273375	-0.613327	0.00773502	0.53966	0.607957
V351M	3	328	0.00914634	2	390	0.00512821	0.00696379	0.0066797	-3.70146	0.00717052	0.000214365	0.577004
V351N	1	546	0.0018315	0	490	0	0.000965251	0	-5.702	0.00570675	1.18411e-08	1.89744
V351Q	4	1031	0.00387973	2	1322	0.00151286	0.00254994	0.00228565	-7.68619	0.00402738	1.51575e-14	0.928207
V351S	3	821	0.00365408	3	945	0.0031746	0.00339751	0.00338914	-6.4849	0.00464273	8.87906e-11	0.141126
V351T	5	1036	0.00482625	13	1419	0.00916138	0.00733198	0.00699034	-5.90702	0.00443086	3.48346e-09	0.591263
V351A	14	1013	0.0138203	33	1384	0.0238439	0.0196078	0.0189356	-2.53397	0.00548441	0.011278	0.511203
V351I	14	682	0.0205279	9	787	0.0114358	0.0156569	0.0150046	-2.99959	0.00595023	0.00270346	0.580704
V351L	8	724	0.0110497	11	1013	0.0108588	0.0109384	0.010938	-4.25615	0.00530215	2.07977e-05	0.0174512
V351V	10538	355743	0.0296225	13682	539009	0.0253836	0.027069	0.026991	-1.35202	0.00476045	0.17637	0.156596
V351F	21	946	0.0221987	24	1269	0.0189125	0.020316	0.0202519	-2.33995	0.00563651	0.0192864	0.161754
V351W	4	356	0.011236	4	471	0.00849257	0.00967352	0.00958014	-3.45161	0.0069045	0.000557253	0.283598
V351Y	12	634	0.0189274	6	862	0.00696056	0.0120321	0.0106356	-3.79405	0.00565967	0.000148212	0.994581
V351G	11	1111	0.00990099	10	1092	0.00915751	0.00953246	0.0095252	-5.00069	0.00479388	5.7127e-07	0.0779947
V351P	5	308	0.0162338	0	468	0	0.0064433	0	-3.92211	0.00689981	8.77752e-05	2.51948
L352H	13	501	0.0259481	11	563	0.0195382	0.0225564	0.0223308	-1.55729	0.00703063	0.119401	0.284173
L352K	0	355	0	0	527	0	0	0	-5.4887	0.00610439	4.0491e-08
L352R	0	324	0	4	487	0.00821355	0.00493218	0	-4.28044	0.00667525	1.86527e-05	1.6653
L352D	2	1078	0.00185529	12	1334	0.0089955	0.00580431	0.00444224	-6.42337	0.00431251	1.33294e-10	1.23016
L352E	7	770	0.00909091	4	833	0.00480192	0.00686213	0.00652475	-5.19399	0.00512958	2.05829e-07	0.625023
L352C	16	708	0.0225989	23	1082	0.0212569	0.0217877	0.0217779	-1.94088	0.00603717	0.0522724	0.0615915
L352M	21	738	0.0284553	30	850	0.0352941	0.0321159	0.0319324	-0.202438	0.00686277	0.839574	0.212942
L352N	3	417	0.00719424	0	433	0	0.00352941	0	-4.64951	0.00644707	3.32718e-06	2.03837
L352Q	15	1163	0.0128977	15	1464	0.0102459	0.0114199	0.011345	-4.69217	0.00470684	2.70323e-06	0.232207
L352S	3	393	0.00763359	4	425	0.00941176	0.00855746	0.00851096	-3.63165	0.00686952	0.000281616	0.207793
L352T	2	533	0.00375235	17	690	0.0246377	0.0155356	0.0108495	-2.85007	0.00630497	0.00437098	1.34436
L352A	10	622	0.0160772	3	760	0.00394737	0.00940666	0.0074269	-4.28252	0.00562717	1.84785e-05	1.28949
L352I	8	369	0.0216802	16	605	0.0264463	0.0246407	0.0245284	-1.20708	0.00734378	0.227403	0.193423
L352L	10538	355743	0.0296225	13682	539009	0.0253836	0.027069	0.026991	-1.35202	0.00476045	0.17637	0.156596
L352V	24	661	0.0363086	22	882	0.0249433	0.0298121	0.0292958	-0.545467	0.00677052	0.585432	0.381232
L352F	9	223	0.0403587	7	364	0.0192308	0.0272572	0.025486	-0.707586	0.0088299	0.479202	0.775133
L352W	22	1512	0.0145503	10	1714	0.00583431	0.0099194	0.00895374	-5.46852	0.004313	4.53808e-08	0.878678
L352Y	10	950	0.0105263	26	1133	0.0229479	0.0172828	0.0160834	-2.95107	0.00549712	0.00316673	0.718728
L352G	7	890	0.00786517	12	1243	0.00965406	0.00890764	0.00886286	-5.13456	0.00479058	2.82807e-07	0.200827
L352P	5	1003	0.00498504	7	960	0.00729167	0.00611309	0.00600398	-5.84584	0.00468573	5.04013e-09	0.377325
A353H	1	541	0.00184843	3	696	0.00431034	0.00323363	0.00297642	-5.58966	0.00541563	2.27511e-08	0.761348
A353K	0	622	0	2	874	0.00228833	0.0013369	0	-6.68115	0.00481478	2.37081e-11	1.71167
A353R	0	690	0	6	855	0.00701754	0.0038835	0	-5.97147	0.00496053	2.35125e-09	1.80702
A353D	4	523	0.00764818	3	732	0.00409836	0.00557769	0.00531524	-5.02481	0.00555791	5.0392e-07	0.636433
A353E	0	213	0	0	281	0	0	0	-4.11707	0.00813811	3.83722e-05
A353C	23	1200	0.0191667	33	1518	0.0217391	0.0206034	0.0205634	-2.38379	0.00541228	0.0171352	0.124856
A353M	1	362	0.00276243	0	455	0	0.00122399	0	-5.02847	0.00641967	4.94399e-07	2.25691
A353N	2	957	0.00208986	9	1430	0.00629371	0.00460829	0.00404529	-6.86037	0.00421214	6.86817e-12	0.912234
A353Q	0	455	0	1	599	0.00166945	0.000948767	0	-5.7538	0.00565824	8.72588e-09	1.7596
A353S	12	290	0.0413793	20	474	0.0421941	0.0418848	0.0418829	0.955582	0.00876917	0.339283	0.0194529
A353T	2	743	0.00269179	12	979	0.0122574	0.00813008	0.00637285	-4.98066	0.00509472	6.33662e-07	1.17657
A353A	10538	355743	0.0296225	13682	539009	0.0253836	0.027069	0.026991	-1.35202	0.00476045	0.17637	0.156596
A353I	1	778	0.00128535	7	1135	0.0061674	0.00418191	0.00325921	-6.4319	0.00455903	1.26017e-10	1.16742
A353L	3	349	0.00859599	2	495	0.0040404	0.00592417	0.0055208	-4.16718	0.00661862	3.08391e-05	0.768983
A353V	3	930	0.00322581	5	1022	0.00489237	0.00409836	0.00401182	-6.51502	0.0045137	7.26823e-11	0.406641
A353F	9	1628	0.00552826	10	1825	0.00547945	0.00550246	0.00550241	-7.41832	0.0037748	1.18613e-13	0.00886939
A353W	1	654	0.00152905	6	929	0.00645856	0.00442198	0.00356146	-5.87012	0.00495444	4.35485e-09	1.11477
A353Y	7	1870	0.00374332	7	2461	0.00284437	0.00323251	0.00320246	-9.38183	0.00322673	6.4837e-21	0.278095
A353G	20	688	0.0290698	21	912	0.0230263	0.025625	0.0254535	-1.22012	0.00645849	0.222418	0.235842
A353P	3	1478	0.00202977	6	2174	0.00275989	0.0024644	0.00243717	-9.28386	0.00334352	1.63447e-20	0.296266
G354H	1	556	0.00179856	1	700	0.00142857	0.00159236	0.0015819	-6.07792	0.00525061	1.21754e-09	0.232354
G354K	4	1044	0.00383142	6	1559	0.00384862	0.00384172	0.00384171	-7.42472	0.00399523	1.13019e-13	0.00447802
G354R	0	645	0	4	828	0.00483092	0.00271555	0	-6.19895	0.00496691	5.68424e-10	1.77899
G354D	3	1090	0.00275229	9	1415	0.00636042	0.00479042	0.00441763	-6.91416	0.00415303	4.70631e-12	0.753197
G354E	1	599	0.00166945	0	641	0	0.000806452	0	-6.26371	0.00522034	3.75934e-10	2.07012
G354C	2	769	0.00260078	4	937	0.00426894	0.003517	0.00341436	-6.34952	0.0047229	2.15981e-10	0.474314
G354M	1	858	0.0011655	4	1410	0.00283688	0.00220459	0.00202624	-7.7166	0.00405627	1.19476e-14	0.758137
G354N	2	801	0.00249688	5	908	0.00550661	0.00409596	0.00380096	-6.16533	0.00477009	7.03345e-10	0.734804
G354Q	4	705	0.00567376	4	883	0.00453001	0.00503778	0.00500617	-5.69431	0.00499927	1.23875e-08	0.227034
G354S	5	721	0.00693481	11	837	0.0131422	0.0102696	0.00977657	-4.26251	0.00545116	2.02148e-05	0.604442
G354T	5	690	0.00724638	2	1070	0.00186916	0.00397727	0.00317947	-6.28101	0.00470114	3.3638e-10	1.35199
G354A	11	643	0.0171073	11	729	0.0150892	0.016035	0.0160035	-2.86136	0.00610554	0.00421825	0.125859
G354I	13	1260	0.0103175	7	1802	0.00388457	0.00653168	0.00580647	-6.67641	0.00404012	2.44867e-11	0.984875
G354L	0	697	0	3	726	0.00413223	0.00210822	0	-6.28631	0.00499449	3.25099e-10	1.96006
G354V	1	881	0.00113507	4	1204	0.00332226	0.00239808	0.00211036	-7.35569	0.00422898	1.89949e-13	0.912056
G354F	9	1035	0.00869565	10	1364	0.00733138	0.00791997	0.00789154	-5.66018	0.00452021	1.51216e-08	0.172258
G354W	1	1064	0.00093985	5	1157	0.00432152	0.00270149	0.00208075	-7.43281	0.00414428	1.06314e-13	1.25178
G354Y	1	489	0.00204499	6	773	0.00776197	0.00554675	0.00462926	-5.04425	0.00554263	4.55305e-07	1.03069
G354G	10538	355743	0.0296225	13682	539009	0.0253836	0.027069	0.026991	-1.35202	0.00476045	0.17637	0.156596
G354P	0	280	0	3	355	0.0084507	0.00472441	0	-3.86341	0.00744958	0.000111817	1.78873
V355H	6	1561	0.00384369	5	1813	0.00275786	0.00326023	0.0032157	-8.52359	0.00354838	1.54686e-17	0.333054
V355K	0	323	0	0	343	0	0	0	-4.77497	0.00701683	1.79734e-06
V355R	4	1114	0.00359066	9	1106	0.00813743	0.00585586	0.00539748	-6.21152	0.00445129	5.24735e-10	0.776448
V355D	4	1138	0.00351494	5	1565	0.00319489	0.00332963	0.00332592	-7.77402	0.00388158	7.60308e-15	0.0961218
V355E	3	604	0.00496689	4	788	0.00507614	0.00502874	0.00502844	-5.3932	0.00528006	6.92157e-08	0.0217261
V355C	8	534	0.0149813	12	753	0.0159363	0.01554	0.0155328	-2.89775	0.00619968	0.00375846	0.0614531
V355M	10	1396	0.00716332	11	1840	0.00597826	0.00648949	0.00646333	-6.81557	0.00396382	9.38906e-12	0.182613
V355N	0	414	0	3	595	0.00504202	0.00297324	0	-5.15572	0.00592195	2.52654e-07	1.6958
V355Q	5	877	0.00570125	3	946	0.00317125	0.00438837	0.00420513	-6.23603	0.00466912	4.48813e-10	0.576525
V355S	3	863	0.00347625	9	1088	0.00827206	0.00615069	0.00563731	-5.82013	0.00469997	5.8801e-09	0.779719
V355T	28	597	0.0469012	12	838	0.0143198	0.0278746	0.0234582	-0.831468	0.00677186	0.405709	1.16886
V355A	1	494	0.00202429	16	574	0.0278746	0.0159176	0.008287	-2.65394	0.00662696	0.00795579	1.62401
V355I	12	515	0.023301	15	642	0.0233645	0.0233362	0.0233362	-1.47371	0.00690024	0.14056	0.00272174
V355L	1	505	0.0019802	1	673	0.00148588	0.00169779	0.00168056	-5.8684	0.0054201	4.40011e-09	0.291151
V355V	10538	355743	0.0296225	13682	539009	0.0253836	0.027069	0.026991	-1.35202	0.00476045	0.17637	0.156596
V355F	1	745	0.00134228	9	893	0.0100784	0.00610501	0.00402877	-5.4528	0.00502497	4.95839e-08	1.43097
V355W	11	625	0.0176	5	828	0.00603865	0.0110117	0.00956694	-3.98654	0.00564235	6.70431e-05	1.04992
V355Y	1	407	0.002457	4	403	0.00992556	0.00617284	0.00492134	-4.04636	0.0067548	5.20213e-05	1.20991
V355G	2	439	0.00455581	0	704	0	0.00174978	0	-5.7719	0.00550172	7.8383e-09	2.60364
V355P	2	1045	0.00191388	3	1177	0.00254885	0.00225023	0.00222754	-7.62748	0.00409768	2.39391e-14	0.282184
V356H	6	487	0.0123203	4	626	0.00638978	0.00898473	0.00851626	-4.03068	0.00608345	5.56164e-05	0.66007
V356K	7	1124	0.00622776	9	1526	0.00589777	0.00603774	0.00603555	-6.55224	0.00419206	5.66785e-11	0.0546539
V356R	4	499	0.00801603	4	768	0.00520833	0.00631413	0.00617235	-4.86386	0.00559042	1.1512e-06	0.444669
V356D	1	537	0.0018622	6	811	0.00739827	0.00519288	0.00427038	-5.27753	0.00536468	1.30938e-07	1.06609
V356E	1	523	0.00191205	0	504	0	0.00097371	0	-5.67592	0.00573149	1.37947e-08	1.96367
V356C	24	657	0.0365297	20	730	0.0273973	0.0317231	0.031397	-0.252679	0.00705248	0.800516	0.287879
V356M	11	901	0.0122087	4	1266	0.00315956	0.00692201	0.00554253	-5.79248	0.00458925	6.93549e-09	1.30729
V356N	5	1281	0.0039032	11	1620	0.00679012	0.00551534	0.00531739	-6.98276	0.00400842	2.89436e-12	0.523435
V356Q	3	532	0.0056391	4	704	0.00568182	0.00566343	0.00566339	-4.9717	0.00560004	6.63667e-07	0.00754321
V356S	0	494	0	1	717	0.0013947	0.000825764	0	-6.18701	0.00528194	6.13157e-10	1.68898
V356T	5	555	0.00900901	8	727	0.0110041	0.0101404	0.0100912	-4.00079	0.00584003	6.31305e-05	0.196749
V356A	15	732	0.0204918	18	940	0.0191489	0.0197368	0.0197257	-2.29294	0.00600465	0.0218513	0.0680386
V356I	18	726	0.0247934	30	1134	0.026455	0.0258065	0.0257936	-1.23234	0.00624723	0.217823	0.0643885
V356L	4	516	0.00775194	12	785	0.0152866	0.0122982	0.0116775	-3.55886	0.0059589	0.000372462	0.612664
V356V	10538	355743	0.0296225	13682	539009	0.0253836	0.027069	0.026991	-1.35202	0.00476045	0.17637	0.156596
V356F	4	904	0.00442478	12	1190	0.010084	0.00764088	0.00706632	-5.49137	0.00470998	3.98823e-08	0.740655
V356W	6	1048	0.00572519	6	1341	0.00447427	0.00502302	0.00498529	-6.69902	0.00425168	2.09817e-11	0.249037
V356Y	5	888	0.00563063	6	1107	0.00542005	0.00551378	0.00551279	-6.08067	0.00460334	1.1968e-09	0.0381909
V356G	2	725	0.00275862	8	939	0.0085197	0.00600962	0.00521254	-5.51458	0.00498597	3.49605e-08	0.958644
V356P	1	388	0.00257732	2	563	0.0035524	0.00315457	0.0031165	-4.97697	0.00609821	6.45888e-07	0.3091
M357H	0	329	0	4	582	0.00687285	0.00439078	0	-4.62015	0.00630161	3.83462e-06	1.56529
M357K	17	1182	0.0143824	20	1621	0.0123381	0.0132001	0.0131621	-4.248	0.00477989	2.15683e-05	0.154873
M357R	3	404	0.00742574	4	545	0.00733945	0.00737619	0.00737606	-4.09386	0.00638249	4.24259e-05	0.0116989
M357D	5	1024	0.00488281	3	1147	0.00261552	0.00368494	0.00351102	-6.96386	0.00428214	3.31064e-12	0.615287
M357E	7	749	0.00934579	7	1012	0.006917	0.00795003	0.00786153	-5.07186	0.00503861	3.93953e-07	0.305508
M357C	32	1220	0.0262295	20	1510	0.013245	0.0190476	0.0179747	-2.7338	0.00528845	0.00626087	0.681685
M357M	10538	355743	0.0296225	13682	539009	0.0253836	0.027069	0.026991	-1.35202	0.00476045	0.17637	0.156596
M357N	2	477	0.00419287	3	520	0.00576923	0.00501505	0.00495226	-4.67475	0.00609446	2.94306e-06	0.314326
M357Q	17	840	0.0202381	23	1184	0.0194257	0.0197628	0.0197588	-2.40313	0.00571851	0.0162555	0.0411084
M357S	4	1053	0.00379867	12	1388	0.00864553	0.00655469	0.00606345	-6.17282	0.00436599	6.70818e-10	0.739449
M357T	5	512	0.00976562	5	588	0.0085034	0.00909091	0.00906922	-3.98997	0.00611891	6.60821e-05	0.138845
M357A	1	454	0.00220264	7	511	0.0136986	0.00829016	0.00579766	-3.94183	0.00639678	8.0863e-05	1.3867
M357I	13	1123	0.0115761	18	1289	0.0139643	0.0128524	0.0127966	-4.17721	0.00494414	2.951e-05	0.185816
M357L	32	739	0.0433018	21	742	0.0283019	0.0357866	0.0349924	0.31788	0.00717716	0.750576	0.419147
M357V	1	536	0.00186567	15	849	0.0176678	0.0115523	0.00740173	-3.79968	0.00577754	0.000144884	1.36788
M357F	3	496	0.00604839	1	581	0.00172117	0.00371402	0.00307039	-5.13623	0.0058002	2.80309e-07	1.1651
M357W	1	763	0.00131062	9	933	0.0096463	0.00589623	0.00392975	-5.58976	0.00493919	2.27378e-08	1.41373
M357Y	2	797	0.00250941	11	984	0.0111789	0.00729927	0.00572858	-5.27927	0.00496392	1.29698e-07	1.18771
M357G	3	422	0.007109	3	588	0.00510204	0.00594059	0.00586054	-4.50219	0.00612248	6.72564e-06	0.337839
M357P	1	622	0.00160772	2	737	0.0027137	0.00220751	0.00213553	-6.12518	0.00510967	9.05837e-10	0.501012
T358H	4	766	0.00522193	8	1097	0.00729262	0.00644122	0.00635687	-5.62832	0.00480853	1.81978e-08	0.321474
T358K	3	400	0.0075	6	506	0.0118577	0.00993377	0.00968654	-3.53508	0.00666784	0.000407648	0.438676
T358R	2	443	0.00451467	3	617	0.00486224	0.00471698	0.00471384	-4.86919	0.00591232	1.12059e-06	0.0736836
T358D	3	530	0.00566038	8	642	0.0124611	0.00938567	0.00872118	-4.02737	0.00598889	5.64038e-05	0.724582
T358E	1	460	0.00217391	10	718	0.0139276	0.00933786	0.00674359	-4.04556	0.00597379	5.21989e-05	1.25871
T358C	27	1161	0.0232558	55	1637	0.033598	0.0293066	0.0288412	-0.69958	0.00600146	0.484189	0.352897
T358M	16	660	0.0242424	33	995	0.0331658	0.0296073	0.0292691	-0.585938	0.00665241	0.557917	0.301393
T358N	40	1930	0.0207254	30	2773	0.0108186	0.0148841	0.0141265	-4.21237	0.00442056	2.52702e-05	0.665594
T358Q	14	473	0.0295983	18	578	0.0311419	0.0304472	0.0304375	-0.407995	0.00749509	0.683277	0.0506963
T358S	36	1381	0.0260681	58	1801	0.0322043	0.0295412	0.0293813	-0.671865	0.00589997	0.50167	0.207719
T358T	10538	355743	0.0296225	13682	539009	0.0253836	0.027069	0.026991	-1.35202	0.00476045	0.17637	0.156596
T358A	9	1325	0.00679245	35	1828	0.0191466	0.013955	0.0123868	-4.15113	0.00470961	3.30842e-05	0.885288
T358I	9	578	0.0155709	15	697	0.0215208	0.0188235	0.0185843	-2.28306	0.00643067	0.0224266	0.316087
T358L	14	695	0.0201439	27	863	0.0312862	0.0263158	0.0257073	-1.09871	0.00654346	0.271894	0.423408
T358V	16	566	0.0282686	18	599	0.0300501	0.0291845	0.0291709	-0.598326	0.00722116	0.549622	0.0610437
T358F	27	1061	0.0254477	45	1450	0.0310345	0.0286738	0.028538	-0.796093	0.00606879	0.425978	0.194839
T358W	6	963	0.00623053	13	1231	0.0105605	0.00865998	0.00837725	-5.25904	0.00472428	1.44812e-07	0.5
T358Y	10	648	0.0154321	9	853	0.010551	0.0126582	0.0124332	-3.65825	0.00569861	0.000253947	0.385607
T358G	10	1115	0.00896861	13	1320	0.00984848	0.00944559	0.00943535	-5.18909	0.00463657	2.11322e-07	0.093152
T358P	1	840	0.00119048	1	1063	0.000940734	0.00105097	0.00104376	-7.59446	0.0042734	3.09072e-14	0.23763
T359H	24	621	0.0386473	43	744	0.0577957	0.0490842	0.0481263	1.94863	0.00799489	0.0513394	0.390112
T359K	29	625	0.0464	35	812	0.0431034	0.0445372	0.0445074	1.43456	0.00769024	0.151414	0.0740179
T359R	19	438	0.043379	29	614	0.0472313	0.0456274	0.0455875	1.46725	0.00826187	0.142308	0.084429
T359D	28	1312	0.0213415	43	1648	0.0260922	0.0239865	0.0238683	-1.70755	0.00557447	0.0877203	0.19806
T359E	38	1072	0.0354478	39	1478	0.026387	0.0301961	0.0298733	-0.537792	0.00615307	0.59072	0.300064
T359C	22	891	0.0246914	33	1080	0.0305556	0.0279046	0.0277495	-0.888375	0.00630425	0.374339	0.210152
T359M	13	406	0.0320197	23	655	0.0351145	0.0339303	0.0338964	0.0554933	0.00766039	0.955745	0.0912106
T359N	12	484	0.0247934	15	622	0.0241158	0.0244123	0.02441	-1.28881	0.00705522	0.197463	0.0277578
T359Q	53	1774	0.029876	80	2190	0.0365297	0.033552	0.0333861	0.00779928	0.00600223	0.993777	0.19831
T359S	22	411	0.053528	21	622	0.0337621	0.0416263	0.0405568	1.0023	0.00810253	0.316198	0.474842
T359T	10538	355743	0.0296225	13682	539009	0.0253836	0.027069	0.026991	-1.35202	0.00476045	0.17637	0.156596
T359A	57	1590	0.0358491	88	2372	0.0370995	0.0365977	0.0365925	0.498627	0.00620208	0.618042	0.0341671
T359I	42	952	0.0441176	63	1354	0.0465288	0.0455334	0.0455178	1.67738	0.00717086	0.0934689	0.0529536
T359L	42	890	0.047191	25	1037	0.024108	0.0347691	0.0328764	0.187094	0.00675551	0.851587	0.663895
T359V	39	1061	0.0367578	45	1433	0.0314027	0.0336808	0.0335782	0.0274549	0.00639883	0.978097	0.158996
T359F	39	1199	0.0325271	57	1443	0.039501	0.0363361	0.0361678	0.435062	0.00650701	0.663517	0.191928
T359W	13	399	0.0325815	13	537	0.0242086	0.0277778	0.0274764	-0.753253	0.00760352	0.451298	0.301424
T359Y	17	590	0.0288136	25	767	0.0325945	0.0309506	0.0308932	-0.362599	0.00704506	0.716905	0.122161
T359G	13	811	0.0160296	34	1077	0.0315692	0.0248941	0.0235954	-1.39635	0.00616687	0.16261	0.624228
T359P	22	695	0.0316547	24	792	0.030303	0.0309348	0.0309274	-0.372819	0.00689447	0.709284	0.0436934
G360H	27	931	0.0290011	39	1176	0.0331633	0.0313242	0.0312552	-0.338808	0.00643726	0.734754	0.132875
G360K	10	330	0.030303	14	454	0.030837	0.0306122	0.0306111	-0.353947	0.00817329	0.723379	0.0174432
G360R	40	729	0.0548697	35	910	0.0384615	0.0457596	0.0450463	1.61854	0.0075713	0.105546	0.358573
G360D	18	1160	0.0155172	44	1571	0.0280076	0.0227023	0.0217943	-1.94187	0.00556312	0.0521529	0.550182
G360E	7	322	0.0217391	6	382	0.0157068	0.0184659	0.0182243	-1.91477	0.00785432	0.0555212	0.326674
G360C	45	1109	0.0405771	44	1431	0.0307477	0.0350394	0.0347065	0.237307	0.00646509	0.812418	0.280524
G360M	16	623	0.0256822	22	894	0.0246085	0.0250494	0.0250439	-1.29928	0.00650801	0.193848	0.0428625
G360N	30	901	0.0332963	43	1009	0.0426165	0.0382199	0.037933	0.676708	0.00696717	0.498591	0.243855
G360Q	2	234	0.00854701	8	389	0.0205656	0.0160514	0.0147881	-2.15303	0.00810663	0.0313165	0.748755
G360S	39	1091	0.035747	52	1431	0.0363382	0.0360825	0.0360813	0.394314	0.00653621	0.693349	0.0163848
G360T	40	1117	0.0358102	40	1399	0.0285919	0.0317965	0.031597	-0.27249	0.00627052	0.785246	0.227017
G360A	17	609	0.0279146	17	915	0.0185792	0.0223097	0.0218615	-1.76941	0.00632723	0.0768261	0.418445
G360I	28	1665	0.0168168	25	2320	0.0107759	0.0132999	0.0129781	-4.57801	0.00441355	4.69424e-06	0.454211
G360L	3	453	0.00662252	8	670	0.0119403	0.00979519	0.00941352	-3.87625	0.00611672	0.000106077	0.542897
G360V	6	451	0.0133038	6	743	0.00807537	0.0100503	0.00975118	-3.91449	0.00599181	9.05951e-05	0.520226
G360F	27	1141	0.0236635	20	1211	0.0165153	0.019983	0.0196634	-2.4427	0.00553575	0.014578	0.357713
G360W	6	650	0.00923077	11	795	0.0138365	0.0117647	0.0115332	-3.80887	0.00570784	0.000139601	0.391485
G360Y	30	1253	0.0239425	16	1484	0.0107817	0.0168067	0.0155348	-3.26862	0.00510872	0.00108075	0.783072
G360G	10538	355743	0.0296225	13682	539009	0.0253836	0.027069	0.026991	-1.35202	0.00476045	0.17637	0.156596
G360P	5	569	0.00878735	10	576	0.0173611	0.0131004	0.0123772	-3.24378	0.00629041	0.00117954	0.654464
T361H	35	602	0.0581395	30	892	0.0336323	0.0435074	0.0419317	1.31947	0.0075805	0.187014	0.56329
T361K	43	844	0.0509479	54	1260	0.0428571	0.0461027	0.0459357	1.72681	0.00729525	0.0842017	0.175494
T361R	36	576	0.0625	17	685	0.0248175	0.0420301	0.0378428	1.09782	0.00776536	0.272282	0.896559
T361D	16	541	0.0295749	18	778	0.0231362	0.0257771	0.0255875	-1.13759	0.00679333	0.25529	0.24978
T361E	36	721	0.0499307	38	1066	0.0356473	0.0414102	0.0408386	1.09366	0.00722806	0.274105	0.344924
T361C	36	791	0.045512	39	1168	0.0333904	0.0382848	0.0378383	0.688677	0.00694039	0.491027	0.316616
T361M	17	617	0.0275527	32	734	0.0435967	0.0362694	0.035354	0.376165	0.00734857	0.706794	0.442358
T361N	16	453	0.0353201	27	582	0.0463918	0.0415459	0.0411729	0.993317	0.00809484	0.320555	0.266492
T361Q	29	899	0.0322581	34	1124	0.0302491	0.0311419	0.0311259	-0.364967	0.00647533	0.715136	0.0645098
T361S	32	795	0.0402516	33	915	0.0360656	0.0380117	0.0379546	0.635045	0.00709641	0.525399	0.110124
T361T	10538	355743	0.0296225	13682	539009	0.0253836	0.027069	0.026991	-1.35202	0.00476045	0.17637	0.156596
T361A	35	806	0.0434243	40	994	0.0402414	0.0416667	0.0416368	1.12836	0.00723308	0.259168	0.0763889
T361I	30	872	0.0344037	32	1053	0.0303894	0.0322078	0.0321462	-0.196477	0.00660313	0.844237	0.124638
T361L	43	1261	0.0340999	61	1859	0.0328133	0.0333333	0.0333274	-0.0278506	0.00616939	0.977781	0.0385974
T361V	39	863	0.0451912	49	1175	0.0417021	0.0431796	0.0431454	1.34924	0.00717026	0.177259	0.0808036
T361F	26	591	0.0439932	31	790	0.0392405	0.0412744	0.0412081	1.02487	0.00758076	0.305425	0.115149
T361W	21	460	0.0456522	13	623	0.0208668	0.0313943	0.0290986	-0.28201	0.00748512	0.777936	0.789488
T361Y	57	1465	0.0389078	47	1867	0.0251741	0.0312125	0.0304852	-0.383726	0.00597476	0.701182	0.440009
T361G	53	1110	0.0477477	68	1354	0.0502216	0.0491071	0.0490917	2.13654	0.00730246	0.0326355	0.0503759
T361P	7	252	0.0277778	18	343	0.0524781	0.0420168	0.0400835	0.902001	0.00943641	0.367056	0.587868
D362H	11	352	0.03125	12	535	0.0224299	0.0259301	0.0255848	-0.992644	0.00763119	0.320883	0.340149
D362K	20	430	0.0465116	32	618	0.0517799	0.0496183	0.0495497	1.9052	0.00845749	0.0567547	0.106177
D362R	62	938	0.0660981	69	1085	0.0635945	0.0647553	0.0647433	3.78012	0.00826698	0.000156753	0.0386626
D362D	10538	355743	0.0296225	13682	539009	0.0253836	0.027069	0.026991	-1.35202	0.00476045	0.17637	0.156596
D362E	16	515	0.031068	12	727	0.0165062	0.0225443	0.0214555	-1.63297	0.00671224	0.102476	0.645919
D362C	21	499	0.0420842	40	754	0.0530504	0.0486832	0.0483768	1.87216	0.00810723	0.061185	0.225257
D362M	41	1105	0.0371041	56	1591	0.035198	0.0359792	0.0359671	0.382621	0.00646613	0.702001	0.0529773
D362N	31	542	0.0571956	27	624	0.0432692	0.0497427	0.0492617	1.96198	0.00827611	0.049765	0.279967
D362Q	25	447	0.0559284	54	820	0.0658537	0.062352	0.0621655	3.30618	0.00872512	0.000945761	0.159181
D362S	29	475	0.0610526	33	653	0.050536	0.0549645	0.0547236	2.5025	0.00857519	0.012332	0.191335
D362T	32	658	0.0486322	45	962	0.0467775	0.0475309	0.0475222	1.82672	0.00767809	0.0677422	0.0390204
D362A	22	551	0.0399274	25	722	0.034626	0.0369207	0.0368283	0.456455	0.00748268	0.648063	0.143588
D362I	30	579	0.0518135	30	902	0.0332594	0.0405132	0.0395534	0.942573	0.00743498	0.345899	0.457976
D362L	7	263	0.026616	12	400	0.03	0.0286576	0.028609	-0.568258	0.00853052	0.56986	0.118085
D362V	13	455	0.0285714	20	670	0.0298507	0.0293333	0.0293266	-0.571679	0.00729749	0.567539	0.0436131
D362F	35	821	0.0426309	46	1138	0.0404218	0.0413476	0.0413333	1.10246	0.00711359	0.27026	0.0534286
D362W	35	665	0.0526316	37	903	0.0409745	0.0459184	0.0455647	1.6251	0.00763845	0.104142	0.253865
D362Y	17	636	0.0267296	30	870	0.0344828	0.0312085	0.0309664	-0.333307	0.0068905	0.738902	0.248432
D362G	15	446	0.0336323	29	641	0.0452418	0.0404784	0.040059	0.877292	0.00794858	0.380328	0.286808
D362P	36	661	0.0544629	29	868	0.0334101	0.0425114	0.041269	1.2016	0.00749522	0.229517	0.495227
V363H	32	745	0.042953	26	872	0.0298165	0.0358689	0.0352776	0.335162	0.00705253	0.737503	0.366237
V363K	9	228	0.0394737	11	253	0.0434783	0.04158	0.0415318	0.801108	0.0100797	0.423069	0.0963101
V363R	23	394	0.0583756	26	792	0.0328283	0.0413153	0.0397461	0.997073	0.00783312	0.318729	0.61835
V363D	12	423	0.0283688	13	516	0.0251938	0.0266241	0.0265775	-0.913245	0.00753476	0.361114	0.119253
V363E	26	1091	0.0238313	55	1477	0.0372376	0.0315421	0.0308058	-0.314936	0.00623332	0.75281	0.425029
V363C	30	936	0.0320513	30	886	0.03386	0.0329308	0.0329184	-0.0854871	0.00671808	0.931874	0.0549261
V363M	41	1077	0.0380687	48	1361	0.0352682	0.0365053	0.036479	0.454875	0.00659561	0.649199	0.0767155
V363N	17	512	0.0332031	22	733	0.0300136	0.0313253	0.0312864	-0.302057	0.0072167	0.762609	0.101818
V363Q	7	305	0.0229508	14	405	0.0345679	0.0295775	0.0289909	-0.468526	0.00838308	0.639409	0.392768
V363S	26	935	0.0278075	41	1123	0.0365093	0.0325559	0.0322614	-0.145112	0.00654169	0.884623	0.26729
V363T	21	818	0.0256724	30	1138	0.026362	0.0260736	0.0260714	-1.19943	0.0061959	0.230362	0.0264508
V363A	25	563	0.044405	11	764	0.0143979	0.0271289	0.0232178	-0.929155	0.00686247	0.352809	1.10609
V363I	70	1782	0.0392817	64	2326	0.027515	0.0326193	0.0321102	-0.149757	0.00591543	0.880957	0.360727
V363L	26	767	0.0338983	35	1114	0.0314183	0.0324296	0.0324069	-0.161834	0.00664627	0.871436	0.0764732
V363V	10538	355743	0.0296225	13682	539009	0.0253836	0.027069	0.026991	-1.35202	0.00476045	0.17637	0.156596
V363F	20	557	0.0359066	25	589	0.0424448	0.039267	0.0391304	0.739665	0.00778982	0.459503	0.166506
V363W	57	1029	0.0553936	47	1340	0.0350746	0.0439004	0.0427759	1.47366	0.00705403	0.140574	0.462842
V363Y	25	336	0.0744048	13	451	0.0288248	0.0482846	0.043211	1.64483	0.00898541	0.100005	0.943984
V363G	17	432	0.0393519	10	584	0.0171233	0.0265748	0.0243918	-0.942068	0.00735653	0.346158	0.836453
V363P	24	549	0.0437158	26	611	0.0425532	0.0431034	0.0430995	1.20555	0.00796178	0.227993	0.0269736
K364H	24	831	0.0288809	35	1229	0.0284784	0.0286408	0.0286401	-0.772729	0.00629506	0.439683	0.0140509
K364K	10538	355743	0.0296225	13682	539009	0.0253836	0.027069	0.026991	-1.35202	0.00476045	0.17637	0.156596
K364R	27	573	0.0471204	29	881	0.0329171	0.0385144	0.0379154	0.681082	0.0073549	0.49582	0.368778
K364D	49	1342	0.0365127	33	1700	0.0194118	0.026956	0.0256513	-1.13682	0.005761	0.255615	0.634402
K364E	47	1599	0.0293934	66	2125	0.0310588	0.0303437	0.0303325	-0.54238	0.00582882	0.587556	0.0548862
K364C	30	886	0.03386	21	957	0.0219436	0.0276723	0.0270314	-0.914323	0.00637946	0.360547	0.430629
K364M	43	1639	0.0262355	69	2195	0.0314351	0.0292123	0.0290968	-0.749412	0.00572828	0.453609	0.177992
K364N	32	703	0.0455192	29	817	0.0354957	0.0401316	0.0398231	0.898302	0.00737661	0.369024	0.249766
K364Q	63	1574	0.0400254	69	2147	0.0321379	0.0354743	0.0352645	0.31903	0.0061724	0.749704	0.222345
K364S	22	949	0.0231823	26	1105	0.0235294	0.023369	0.0233684	-1.70349	0.0059502	0.0884759	0.0148536
K364T	19	863	0.0220162	24	1038	0.0231214	0.0226197	0.022613	-1.81258	0.00600552	0.0698968	0.0488586
K364A	18	586	0.0307167	25	792	0.0315657	0.0312046	0.0312018	-0.327068	0.00703373	0.743616	0.0272053
K364I	34	1289	0.026377	33	1762	0.0187287	0.02196	0.0216441	-2.1403	0.00539417	0.0323305	0.348284
K364L	31	1139	0.0272169	47	1580	0.0297468	0.028687	0.0286596	-0.804657	0.00598781	0.421018	0.0881925
K364V	34	789	0.0430925	22	1039	0.0211742	0.0306346	0.0287742	-0.436595	0.00657492	0.662405	0.715476
K364F	14	1077	0.0129991	33	1167	0.0282776	0.0209447	0.0194736	-2.21714	0.00566515	0.0266137	0.72947
K364W	35	1014	0.0345168	33	1391	0.0237239	0.0282744	0.0277872	-0.859041	0.00608903	0.390318	0.381717
K364Y	12	564	0.0212766	25	693	0.036075	0.0294352	0.0284656	-0.573795	0.00709311	0.566106	0.502747
K364G	32	964	0.033195	27	1199	0.0225188	0.0272769	0.0267703	-1.01332	0.00614633	0.310905	0.391402
K364P	10	623	0.0160514	13	750	0.0173333	0.0167516	0.0167394	-2.72329	0.00615193	0.00646345	0.076528
D365H	104	1621	0.0641579	127	2088	0.0608238	0.0622809	0.0622591	3.74393	0.00768598	0.000181163	0.0535344
D365K	50	477	0.104822	51	620	0.0822581	0.0920693	0.0914016	5.77467	0.0101415	7.71027e-09	0.245073
D365R	39	580	0.0672414	73	789	0.0925222	0.0818115	0.0808205	5.1173	0.00943982	3.09938e-07	0.309013
D365D	10538	355743	0.0296225	13682	539009	0.0253836	0.027069	0.026991	-1.35202	0.00476045	0.17637	0.156596
D365E	14	609	0.0229885	35	940	0.037234	0.0316333	0.0308036	-0.27239	0.00687193	0.785322	0.450333
D365C	51	1077	0.0473538	63	1372	0.0459184	0.0465496	0.0465442	1.81948	0.00716934	0.0688383	0.0308358
D365M	44	592	0.0743243	36	807	0.0446097	0.0571837	0.0553661	2.83655	0.00834765	0.00456037	0.519635
D365N	46	817	0.0563035	72	1145	0.0628821	0.0601427	0.0600541	3.29655	0.00808043	0.000978795	0.109382
D365Q	21	454	0.0462555	30	632	0.0474684	0.0469613	0.0469575	1.62763	0.00826733	0.103603	0.0258265
D365S	56	635	0.088189	29	805	0.0360248	0.0590278	0.0534635	3.04065	0.0083938	0.00236066	0.883722
D365T	40	710	0.056338	58	1026	0.0565302	0.0564516	0.0564515	2.85506	0.00803712	0.00430287	0.00340444
D365A	54	891	0.0606061	60	1220	0.0491803	0.0540028	0.0537136	2.66053	0.00770435	0.00780166	0.211577
D365I	43	1197	0.0359231	55	1699	0.032372	0.0338398	0.0337951	0.0533982	0.00626658	0.957415	0.10494
D365L	49	985	0.0497462	64	1274	0.0502355	0.0500221	0.0500215	2.22232	0.00743231	0.0262617	0.00978139
D365V	48	941	0.0510096	64	1332	0.048048	0.0492741	0.0492526	2.13475	0.0073868	0.0327818	0.0601029
D365F	51	719	0.0709318	49	930	0.0526882	0.0606428	0.0599813	3.27081	0.00829691	0.00107238	0.300838
D365W	73	1048	0.0696565	62	1069	0.0579981	0.0637695	0.0635029	3.70106	0.00817721	0.000214703	0.18282
D365Y	40	684	0.0584795	37	943	0.0392365	0.0473264	0.0464037	1.80387	0.00766197	0.0712515	0.406603
D365G	35	910	0.0384615	76	1273	0.0597015	0.0508475	0.049703	2.30952	0.00750906	0.0209149	0.417719
D365P	11	509	0.021611	10	605	0.0165289	0.018851	0.0186828	-2.18324	0.00671213	0.0290184	0.269592
A366H	24	779	0.0308087	52	1192	0.0436242	0.0385591	0.0380212	0.727306	0.00694886	0.467038	0.332358
A366K	20	583	0.0343053	17	936	0.0181624	0.0243581	0.0231833	-1.41536	0.00646266	0.156962	0.662732
A366R	15	836	0.0179426	38	1007	0.0377358	0.0287575	0.0269338	-0.736335	0.00644774	0.461527	0.688283
A366D	3	683	0.00439239	10	1118	0.00894454	0.00721821	0.00683013	-5.32493	0.00493658	1.00992e-07	0.630649
A366E	20	1846	0.0108342	15	2504	0.00599042	0.00804598	0.00770308	-6.70477	0.00379718	2.01731e-11	0.602018
A366C	35	1023	0.0342131	50	1438	0.0347705	0.0345388	0.0345377	0.159865	0.00646578	0.872987	0.0161388
A366M	44	1080	0.0407407	41	1352	0.0303254	0.0349507	0.0345739	0.222273	0.00650328	0.824101	0.298
A366N	21	773	0.0271669	17	1102	0.0154265	0.0202667	0.0194801	-2.25758	0.00586402	0.0239719	0.579295
A366Q	4	503	0.00795229	8	566	0.0141343	0.0112254	0.0107831	-3.52052	0.00632853	0.000430702	0.550712
A366S	9	325	0.0276923	4	389	0.0102828	0.0182073	0.0161418	-1.96134	0.00779971	0.0498397	0.956185
A366T	24	1243	0.0193081	36	1635	0.0220183	0.0208478	0.020804	-2.35739	0.00536922	0.0184039	0.13
A366A	10538	355743	0.0296225	13682	539009	0.0253836	0.027069	0.026991	-1.35202	0.00476045	0.17637	0.156596
A366I	25	786	0.0318066	40	1008	0.0396825	0.0362319	0.0360167	0.393355	0.00693197	0.694057	0.217375
A366L	29	706	0.0410765	34	976	0.0348361	0.0374554	0.0373308	0.557365	0.00708737	0.577278	0.166609
A366V	47	1346	0.0349183	61	1842	0.0331162	0.033877	0.0338654	0.0601099	0.00618674	0.952068	0.0531953
A366F	45	1023	0.0439883	42	1219	0.0344545	0.0388046	0.0385171	0.777191	0.00681876	0.437046	0.245687
A366W	19	579	0.0328152	28	649	0.0431433	0.0382736	0.0379211	0.626117	0.00761592	0.531238	0.269849
A366Y	76	1605	0.047352	74	2387	0.0310013	0.0375752	0.0367571	0.650196	0.00625965	0.515566	0.435148
A366G	72	1878	0.0383387	69	2235	0.0308725	0.0342815	0.0340818	0.128836	0.00602621	0.897488	0.21779
A366P	15	771	0.0194553	26	971	0.0267765	0.0235362	0.0232466	-1.60942	0.00619416	0.107525	0.311065
K367H	21	579	0.0362694	24	792	0.030303	0.0328228	0.0326926	-0.0956556	0.0071339	0.923794	0.181776
K367K	10538	355743	0.0296225	13682	539009	0.0253836	0.027069	0.026991	-1.35202	0.00476045	0.17637	0.156596
K367R	74	1916	0.0386221	80	2213	0.03615	0.0372972	0.0372768	0.609615	0.00622034	0.542117	0.0662814
K367D	24	1016	0.023622	25	1303	0.0191865	0.0211298	0.0210168	-2.19533	0.00563712	0.0281398	0.209919
K367E	25	1066	0.0234522	38	1346	0.0282318	0.0261194	0.0260098	-1.24321	0.00594088	0.213791	0.182992
K367C	78	1870	0.0417112	83	2258	0.0367582	0.0390019	0.0389245	0.868572	0.00632853	0.385081	0.126995
K367M	29	742	0.0390836	24	1055	0.0227488	0.0294936	0.0284451	-0.614502	0.00652814	0.538884	0.55384
K367N	22	784	0.0280612	20	1099	0.0181984	0.0223048	0.0217941	-1.86741	0.00599778	0.061844	0.442185
K367Q	17	651	0.0261137	30	950	0.0315789	0.0293567	0.0292307	-0.620405	0.00668676	0.534991	0.186168
K367S	9	612	0.0147059	19	983	0.0193286	0.0175549	0.0174041	-2.68798	0.00593393	0.00718851	0.263329
K367T	17	449	0.0378619	18	551	0.0326679	0.035	0.0349055	0.190771	0.00783581	0.848705	0.148401
K367A	24	831	0.0288809	43	1168	0.0368151	0.0335168	0.0332816	0.00174876	0.00663542	0.998605	0.236723
K367I	9	712	0.0126404	31	960	0.0322917	0.0239234	0.0216588	-1.52531	0.0062818	0.127181	0.821421
K367L	23	692	0.033237	35	1065	0.0328638	0.0330108	0.0330103	-0.0730023	0.00677158	0.941804	0.0113037
K367V	35	1240	0.0282258	48	1615	0.0297214	0.0290718	0.0290623	-0.743063	0.00596632	0.457444	0.0514435
K367F	44	1010	0.0435644	34	1261	0.0269627	0.0343461	0.0333759	0.128614	0.00653857	0.897663	0.483363
K367W	7	552	0.0126812	14	651	0.0215054	0.0174564	0.0168769	-2.48343	0.00646236	0.0130125	0.505502
K367Y	33	1007	0.0327706	39	1322	0.0295008	0.0309146	0.0308725	-0.411446	0.00629633	0.680746	0.105771
K367G	20	692	0.0289017	16	975	0.0164103	0.0215957	0.0207565	-1.9415	0.00613417	0.0521981	0.578425
K367P	3	504	0.00595238	6	537	0.0111732	0.00864553	0.00823699	-3.99351	0.006225	6.51018e-05	0.603873
V368H	5	1035	0.00483092	4	1277	0.00313234	0.00389273	0.00380279	-7.06063	0.00419402	1.65755e-12	0.436345
V368K	4	435	0.0091954	3	609	0.00492611	0.00670498	0.00638923	-4.40207	0.00608808	1.07222e-05	0.636735
V368R	1	492	0.00203252	6	878	0.00683371	0.00510949	0.00442114	-5.33566	0.00532187	9.51984e-08	0.939662
V368D	0	620	0	6	886	0.00677201	0.00398406	0	-5.87633	0.00502373	4.19464e-09	1.69977
V368E	5	689	0.00725689	14	1143	0.0122485	0.0103712	0.0100597	-4.47941	0.00516452	7.48507e-06	0.481293
V368C	22	757	0.0290621	28	979	0.0286006	0.0288018	0.0288009	-0.719828	0.00653394	0.471631	0.0160224
V368M	17	938	0.0181237	17	1357	0.0125276	0.0148148	0.0145686	-3.61373	0.00517204	0.000301826	0.377732
V368N	5	919	0.0054407	10	1069	0.00935454	0.00754527	0.00728145	-5.42054	0.00478917	5.94177e-08	0.518714
V368Q	2	605	0.00330579	3	735	0.00408163	0.00373134	0.00371104	-5.6557	0.00526439	1.5521e-08	0.207927
V368S	1	434	0.00230415	4	540	0.00740741	0.00513347	0.00440235	-4.60183	0.00616531	4.18802e-06	0.994115
V368T	29	706	0.0410765	11	797	0.0138018	0.0266134	0.0230369	-1.04112	0.00661955	0.297822	1.02485
V368A	11	448	0.0245536	11	663	0.0165913	0.019802	0.0194323	-2.02251	0.00677532	0.0431232	0.402097
V368I	23	832	0.0276442	30	1056	0.0284091	0.028072	0.0280695	-0.852667	0.00637192	0.393844	0.0272463
V368L	23	767	0.029987	18	1026	0.0175439	0.0228667	0.0220655	-1.74203	0.00610693	0.0815031	0.544158
V368V	10538	355743	0.0296225	13682	539009	0.0253836	0.027069	0.026991	-1.35202	0.00476045	0.17637	0.156596
V368F	4	1067	0.00374883	8	1183	0.00676247	0.00533333	0.00511217	-6.43229	0.00437975	1.25692e-10	0.565057
V368W	1	1157	0.000864304	17	1326	0.0128205	0.0072493	0.00364876	-5.95901	0.00440608	2.53766e-09	1.64929
V368Y	4	963	0.00415369	4	1068	0.00374532	0.00393895	0.00393368	-6.6803	0.00442588	2.38447e-11	0.103674
V368G	2	951	0.00210305	8	1225	0.00653061	0.00459559	0.00398001	-6.62154	0.00436599	3.55485e-11	0.963438
V368P	7	684	0.0102339	8	790	0.0101266	0.0101764	0.0101763	-4.20157	0.0055524	2.65075e-05	0.0105475
I369H	8	3222	0.00248293	35	4390	0.00797267	0.00564898	0.0048658	-9.19981	0.00302791	3.58574e-20	0.971811
I369K	3	658	0.00455927	9	826	0.0108959	0.00808625	0.0074045	-4.72376	0.00538107	2.3152e-06	0.783628
I369R	9	2299	0.00391475	25	3086	0.0081011	0.00631383	0.00593886	-8.01258	0.00339358	1.12328e-15	0.663045
I369D	1	641	0.00156006	7	862	0.00812065	0.00532269	0.00401827	-5.48589	0.00513727	4.11398e-08	1.23257
I369E	2	180	0.0111111	0	342	0	0.00383142	0	-3.65711	0.00811399	0.000255076	2.9
I369C	19	2019	0.0094106	41	2905	0.0141136	0.0121852	0.0119526	-5.17207	0.00412213	2.3152e-07	0.385959
I369M	7	713	0.00981767	8	1155	0.00692641	0.00802998	0.00791288	-5.15807	0.00493889	2.49504e-07	0.360059
I369N	9	1206	0.00746269	10	1631	0.00613121	0.00669722	0.00666542	-6.44357	0.00416042	1.16696e-10	0.198811
I369Q	4	1312	0.00304878	2	1691	0.00118273	0.001998	0.00178877	-8.82907	0.00356857	1.05552e-18	0.933957
I369S	3	698	0.00429799	4	783	0.00510856	0.00472654	0.00470907	-5.62024	0.00512053	1.90694e-08	0.171492
I369T	3	786	0.00381679	13	1095	0.0118721	0.00850611	0.00738914	-5.03351	0.00496652	4.81579e-07	0.947007
I369A	24	1980	0.0121212	19	2490	0.00763052	0.00961969	0.00936665	-6.06095	0.00394088	1.35319e-09	0.466823
I369I	10538	355743	0.0296225	13682	539009	0.0253836	0.027069	0.026991	-1.35202	0.00476045	0.17637	0.156596
I369L	20	860	0.0232558	25	1163	0.0214961	0.0222442	0.0222273	-1.91078	0.00589339	0.056033	0.0791075
I369V	27	502	0.0537849	16	711	0.0225035	0.0354493	0.0322742	0.259628	0.00748819	0.795151	0.882425
I369F	3	705	0.00425532	9	910	0.00989011	0.00743034	0.00684404	-5.05267	0.0051606	4.35675e-07	0.758349
I369W	9	1350	0.00666667	6	1575	0.00380952	0.00512821	0.00493222	-7.1729	0.00395613	7.34232e-13	0.557143
I369Y	5	1346	0.00371471	6	1765	0.00339943	0.00353584	0.00353242	-8.11284	0.00369406	4.94495e-16	0.089166
I369G	1	611	0.00163666	4	920	0.00434783	0.00326584	0.00294398	-6.13598	0.00492819	8.46337e-10	0.830159
I369P	4	590	0.00677966	2	851	0.00235018	0.00416378	0.00362649	-5.71435	0.00513469	1.10126e-08	1.06381
S370H	1	694	0.00144092	4	950	0.00421053	0.00304136	0.00267761	-6.40346	0.0047574	1.51897e-10	0.910646
S370K	2	764	0.0026178	4	1067	0.00374883	0.0032769	0.00322716	-6.62849	0.00456035	3.39127e-11	0.345152
S370R	1	685	0.00145985	8	919	0.00870511	0.00561097	0.00406075	-5.54971	0.00502624	2.86144e-08	1.29127
S370D	1	682	0.00146628	7	1128	0.00620567	0.00441989	0.00360329	-6.20725	0.0046857	5.3921e-10	1.07229
S370E	4	1076	0.00371747	6	1455	0.00412371	0.00395101	0.00394585	-7.29528	0.00405113	2.98043e-13	0.102819
S370C	30	600	0.05	34	913	0.0372399	0.0423001	0.0418556	1.17281	0.00749899	0.240871	0.301657
S370M	11	913	0.0120482	4	1012	0.00395257	0.00779221	0.00670585	-5.28417	0.00486604	1.26279e-07	1.03894
S370N	27	827	0.0326481	27	1213	0.0222589	0.0264706	0.0259981	-1.14073	0.00616671	0.253981	0.392483
S370Q	6	564	0.0106383	7	963	0.00726895	0.00851343	0.00836686	-4.66582	0.00535634	3.07392e-06	0.395769
S370S	10538	355743	0.0296225	13682	539009	0.0253836	0.027069	0.026991	-1.35202	0.00476045	0.17637	0.156596
S370T	13	575	0.0226087	9	626	0.014377	0.0183181	0.0178565	-2.32933	0.00651992	0.0198413	0.449376
S370A	22	539	0.0408163	23	598	0.0384615	0.0395778	0.0395604	0.776557	0.00782001	0.43742	0.0594976
S370I	9	1065	0.0084507	28	1822	0.0153677	0.0128161	0.0123254	-4.39184	0.0047108	1.12393e-05	0.539715
S370L	9	1235	0.00728745	23	1882	0.012221	0.0102663	0.00995738	-5.29739	0.00438685	1.17467e-07	0.480563
S370V	53	1230	0.0430894	46	1494	0.0307898	0.0363436	0.0358357	0.438097	0.00647906	0.661316	0.338425
S370F	0	457	0	5	617	0.00810373	0.00465549	0	-4.91139	0.00587403	9.04314e-07	1.74068
S370W	9	1171	0.00768574	12	1639	0.00732154	0.00747331	0.00747116	-6.12439	0.00425052	9.10344e-10	0.0487336
S370Y	3	672	0.00446429	2	841	0.00237812	0.00330469	0.0031457	-6.09231	0.00495715	1.11293e-09	0.631273
S370G	24	1291	0.0185902	51	1963	0.0259806	0.0230486	0.0227498	-1.93108	0.0054149	0.0534733	0.320645
S370P	13	2274	0.0057168	14	2860	0.0048951	0.00525906	0.00524338	-8.54434	0.00330583	1.29273e-17	0.156244
V371H	2	475	0.00421053	0	709	0	0.00168919	0	-5.88479	0.00540648	3.98566e-09	2.49263
V371K	3	678	0.00442478	8	980	0.00816327	0.0066345	0.00635478	-5.32652	0.00504469	1.0011e-07	0.563492
V371R	3	474	0.00632911	2	771	0.00259403	0.00401606	0.00364297	-5.40131	0.00545962	6.61563e-08	0.930035
V371D	1	436	0.00229358	1	593	0.00168634	0.00194363	0.00192106	-5.44563	0.00579575	5.16216e-08	0.312424
V371E	6	711	0.00843882	17	1230	0.0138211	0.0118496	0.0115361	-4.17583	0.00518593	2.96895e-05	0.454221
V371C	10	881	0.0113507	23	1180	0.0194915	0.0160116	0.0154692	-3.22945	0.00541686	0.00124027	0.508429
V371M	27	1666	0.0162065	43	2249	0.0191196	0.0178799	0.0178209	-3.22973	0.00483793	0.00123909	0.162927
V371N	4	577	0.00693241	4	666	0.00600601	0.00643604	0.00641955	-4.79644	0.00564358	1.61509e-06	0.14394
V371Q	2	868	0.00230415	4	964	0.00414938	0.00327511	0.00314008	-6.63068	0.00455912	3.34144e-11	0.56341
V371S	2	434	0.00460829	8	650	0.0123077	0.00922509	0.00830548	-3.93939	0.00616341	8.16907e-05	0.834615
V371T	6	512	0.0117188	13	689	0.0188679	0.0158201	0.0154008	-2.77991	0.00636172	0.00543737	0.451903
V371A	7	535	0.0130841	4	758	0.00527704	0.00850735	0.00768353	-4.38185	0.00570486	1.17677e-05	0.917685
V371I	22	640	0.034375	29	864	0.0335648	0.0339096	0.0339072	0.0573803	0.00704806	0.954242	0.0238925
V371L	26	647	0.0401855	29	889	0.0326209	0.0358073	0.0356162	0.323172	0.00712356	0.746565	0.211257
V371V	10538	355743	0.0296225	13682	539009	0.0253836	0.027069	0.026991	-1.35202	0.00476045	0.17637	0.156596
V371F	21	410	0.0512195	19	586	0.0324232	0.0401606	0.0391382	0.821416	0.00810245	0.411409	0.468028
V371W	8	457	0.0175055	6	877	0.00684151	0.0104948	0.00943912	-3.98105	0.00577999	6.8612e-05	1.01612
V371Y	5	984	0.0050813	8	1392	0.00574713	0.00547138	0.0054614	-6.51318	0.00430416	7.35768e-11	0.121692
V371G	6	1294	0.00463679	6	1457	0.00411805	0.00436205	0.0043544	-7.35055	0.00396475	1.97393e-13	0.11892
V371P	2	594	0.003367	2	669	0.00298954	0.00316706	0.00316148	-5.65997	0.00536012	1.51401e-08	0.119185
S372H	3	659	0.00455235	11	857	0.0128355	0.00923483	0.00817941	-4.47302	0.00542593	7.71215e-06	0.896944
S372K	1	539	0.00185529	7	743	0.00942127	0.00624025	0.00475782	-4.90556	0.00555796	9.31608e-07	1.21245
S372R	7	607	0.0115321	4	761	0.00525624	0.00804094	0.00744879	-4.58982	0.00554798	4.43624e-06	0.780492
S372D	2	756	0.0026455	7	883	0.00792752	0.00549115	0.00477847	-5.63341	0.00497283	1.76682e-08	0.961914
S372E	3	423	0.0070922	3	723	0.00414938	0.0052356	0.00505721	-4.91534	0.00575129	8.86295e-07	0.562079
S372C	24	886	0.027088	25	1005	0.0248756	0.0259122	0.0258888	-1.21853	0.00623121	0.223021	0.0853811
S372M	1	668	0.00149701	8	812	0.00985222	0.00608108	0.00420909	-5.24321	0.0052304	1.57809e-07	1.37397
S372N	10	683	0.0146413	23	910	0.0252747	0.0207156	0.0199998	-2.07979	0.00614944	0.0375451	0.513305
S372Q	3	855	0.00350877	6	1233	0.00486618	0.00431034	0.00425626	-6.61844	0.00441113	3.63004e-11	0.314919
S372S	10538	355743	0.0296225	13682	539009	0.0253836	0.027069	0.026991	-1.35202	0.00476045	0.17637	0.156596
S372T	14	688	0.0203488	21	1012	0.020751	0.0205882	0.0205873	-2.14007	0.00603574	0.0323489	0.019533
S372A	28	820	0.0341463	16	946	0.0169133	0.0249151	0.023437	-1.37142	0.00626364	0.170244	0.691671
S372I	1	600	0.00166667	4	869	0.00460299	0.00340368	0.00303976	-5.98423	0.00503013	2.17416e-09	0.862692
S372L	4	1026	0.00389864	9	1263	0.00712589	0.00567934	0.00543796	-6.34659	0.00438437	2.20136e-10	0.568245
S372V	1	1244	0.000803859	14	1644	0.00851582	0.00519391	0.00308098	-7.11133	0.00398115	1.14934e-12	1.48481
S372F	17	1801	0.0094392	12	2352	0.00510204	0.0069829	0.00666216	-7.11719	0.00372651	1.10151e-12	0.621111
S372W	5	954	0.00524109	5	1129	0.0044287	0.00480077	0.00478384	-6.43388	0.00446144	1.24383e-10	0.169221
S372Y	7	1785	0.00392157	16	2314	0.00691443	0.00561112	0.00540134	-7.78402	0.0035835	7.02538e-15	0.533381
S372G	16	441	0.0362812	12	679	0.017673	0.025	0.0234589	-1.20419	0.00706296	0.228516	0.744325
S372P	4	978	0.00408998	9	1087	0.00827967	0.0062954	0.00592858	-5.89773	0.0046136	3.68536e-09	0.665516
T373H	3	721	0.00416089	10	929	0.0107643	0.00787879	0.00710565	-4.97112	0.00515505	6.65681e-07	0.838121
T373K	2	645	0.00310078	5	738	0.00677507	0.00506146	0.00470549	-5.36973	0.00529705	7.88555e-08	0.725935
T373R	6	857	0.00700117	5	859	0.00582072	0.00641026	0.00638303	-5.46312	0.0049596	4.6784e-08	0.184149
T373D	3	849	0.00353357	3	1239	0.00242131	0.00287356	0.00282358	-7.16854	0.00427306	7.58007e-13	0.387067
T373E	2	719	0.00278164	8	914	0.00875274	0.0061237	0.0052838	-5.44084	0.00503258	5.303e-08	0.97508
T373C	10	899	0.0111235	10	1415	0.00706714	0.00864304	0.00842903	-5.35779	0.00464037	8.42476e-08	0.469318
T373M	4	1243	0.00321802	11	1522	0.00722733	0.00542495	0.00502356	-6.90292	0.00406788	5.09461e-12	0.73905
T373N	6	1369	0.00438276	8	1991	0.00401808	0.00416667	0.00416285	-8.01687	0.00365959	1.08473e-15	0.0875231
T373Q	6	794	0.00755668	13	1136	0.0114437	0.00984456	0.00964755	-4.70085	0.00503326	2.59085e-06	0.394836
T373S	37	1146	0.0322862	37	1511	0.0244871	0.027851	0.0275886	-0.94956	0.00595454	0.342336	0.280031
T373T	10538	355743	0.0296225	13682	539009	0.0253836	0.027069	0.026991	-1.35202	0.00476045	0.17637	0.156596
T373A	14	1041	0.0134486	14	1417	0.00988003	0.0113914	0.0112584	-4.61262	0.00479419	3.9763e-06	0.31327
T373I	6	1065	0.0056338	9	1521	0.00591716	0.00580046	0.00579878	-6.58866	0.00420491	4.43826e-11	0.0488507
T373L	11	1178	0.00933786	7	1589	0.00440529	0.00650524	0.00606567	-6.46514	0.00417623	1.01207e-10	0.758246
T373V	4	405	0.00987654	3	662	0.00453172	0.00656045	0.00609098	-4.47381	0.00602277	7.6839e-06	0.814703
T373F	7	1502	0.00466045	7	2001	0.00349825	0.00399657	0.00395609	-8.23165	0.00358477	1.84648e-16	0.2908
T373W	4	847	0.00472255	8	1111	0.00720072	0.0061287	0.00599966	-5.83514	0.00469165	5.37447e-09	0.404355
T373Y	3	879	0.00341297	4	1331	0.00300526	0.00316742	0.00316124	-7.22367	0.00419977	5.0604e-13	0.12872
T373G	4	930	0.00430108	7	1016	0.00688976	0.00565262	0.00550063	-5.9765	0.00466034	2.27979e-09	0.457963
T373P	2	1463	0.00136705	14	2037	0.00687285	0.00457143	0.00349923	-7.92154	0.00365254	2.34593e-15	1.20439
G374H	3	931	0.00322234	2	1095	0.00182648	0.00246792	0.00237091	-7.23551	0.00428957	4.63796e-13	0.565601
G374K	3	544	0.00551471	0	894	0	0.00208623	0	-6.32348	0.00496861	2.55735e-10	2.64338
G374R	3	1033	0.00290416	7	1148	0.00609756	0.00458505	0.00429123	-6.63148	0.00436103	3.32334e-11	0.69648
G374D	7	1604	0.00436409	10	2544	0.00393082	0.00409836	0.00409301	-8.68062	0.00338764	3.93608e-18	0.105718
G374E	1	469	0.0021322	2	1314	0.00152207	0.00168256	0.00166319	-7.12492	0.00446638	1.04139e-12	0.362618
G374C	9	1089	0.00826446	7	1286	0.00544323	0.00673684	0.00659196	-6.04852	0.0044256	1.46182e-09	0.418776
G374M	0	505	0	6	774	0.00775194	0.00469116	0	-5.28988	0.005447	1.22395e-07	1.65245
G374N	3	811	0.00369914	4	1138	0.00351494	0.00359159	0.00359044	-6.69275	0.00446955	2.1902e-11	0.0512861
G374Q	2	390	0.00512821	2	545	0.00366972	0.00427807	0.00421942	-4.69816	0.00622096	2.62511e-06	0.34092
G374S	8	1665	0.0048048	19	2252	0.00843694	0.00689303	0.00664128	-7.04044	0.00377989	1.9163e-12	0.526929
G374T	1	755	0.0013245	2	1004	0.00199203	0.00170551	0.00167194	-7.07212	0.00449648	1.52582e-12	0.391394
G374A	7	1040	0.00673077	10	1314	0.00761035	0.00722175	0.0072084	-5.86073	0.00448466	4.60837e-09	0.121796
G374I	4	851	0.00470035	12	1103	0.0108794	0.00818833	0.00754867	-5.19435	0.00487392	2.05437e-07	0.754619
G374L	0	430	0	7	693	0.010101	0.0062333	0	-4.64424	0.00587219	3.41338e-06	1.62049
G374V	0	907	0	6	1165	0.00515021	0.00289575	0	-7.1361	0.00428938	9.60176e-13	1.77854
G374F	4	298	0.0134228	4	569	0.00702988	0.00922722	0.00878002	-3.59942	0.00674495	0.000318923	0.692835
G374W	2	848	0.00235849	6	1095	0.00547945	0.00411734	0.00379276	-6.49593	0.00452404	8.25239e-11	0.758004
G374Y	1	740	0.00135135	5	873	0.00572738	0.00371978	0.0029527	-6.13392	0.00485585	8.57395e-10	1.17642
G374G	10538	355743	0.0296225	13682	539009	0.0253836	0.027069	0.026991	-1.35202	0.00476045	0.17637	0.156596
G374P	2	728	0.00274725	4	904	0.00442478	0.00367647	0.00357731	-6.17857	0.00482777	6.46864e-10	0.456287
T375H	4	727	0.00550206	5	1204	0.00415282	0.0046608	0.00461683	-6.29074	0.00458521	3.15949e-10	0.289487
T375K	2	639	0.00312989	5	976	0.00512295	0.00433437	0.00421552	-5.94643	0.0049056	2.7405e-09	0.459827
T375R	2	844	0.00236967	5	1093	0.00457457	0.00361384	0.00343463	-6.66734	0.00448324	2.60478e-11	0.610127
T375D	1	679	0.00147275	5	931	0.00537057	0.00372671	0.00311207	-6.12684	0.00486033	8.96405e-10	1.04591
T375E	7	1362	0.0051395	8	1473	0.00543109	0.00529101	0.005289	-7.02223	0.00401783	2.18348e-12	0.0551109
T375C	2	593	0.00337268	11	736	0.0149457	0.00978179	0.00769181	-4.13515	0.00573701	3.54729e-05	1.18311
T375M	6	1531	0.00391901	10	2031	0.00492368	0.00449186	0.00446364	-8.01274	0.0036209	1.1218e-15	0.223666
T375N	15	842	0.0178147	18	1178	0.0152801	0.0163366	0.0162896	-3.13824	0.00547076	0.00169968	0.155148
T375Q	9	910	0.00989011	11	938	0.0117271	0.0108225	0.0107834	-4.37412	0.00518564	1.21922e-05	0.169736
T375S	12	574	0.0209059	30	749	0.0400534	0.031746	0.0302085	-0.246604	0.00713339	0.805215	0.603146
T375T	10538	355743	0.0296225	13682	539009	0.0253836	0.027069	0.026991	-1.35202	0.00476045	0.17637	0.156596
T375A	14	850	0.0164706	7	1204	0.00581395	0.010224	0.00894581	-4.6913	0.00496263	2.71471e-06	1.04232
T375I	2	811	0.00246609	15	1060	0.0141509	0.00908605	0.00663571	-4.86064	0.00502385	1.17009e-06	1.28602
T375L	1	456	0.00219298	4	641	0.00624025	0.00455789	0.00404031	-4.97999	0.00581272	6.35874e-07	0.88797
T375V	6	654	0.00917431	3	1009	0.00297324	0.00541191	0.00463097	-5.69014	0.00493718	1.26939e-08	1.14582
T375F	6	773	0.00776197	6	1199	0.00500417	0.00608519	0.00594375	-5.86506	0.00467514	4.48982e-09	0.453198
T375W	2	1051	0.00190295	10	1654	0.00604595	0.00443623	0.00385836	-7.27085	0.00399801	3.57222e-13	0.933901
T375Y	3	1262	0.00237718	8	1478	0.00541272	0.0040146	0.00370531	-7.49633	0.003934	6.56287e-14	0.756126
T375G	9	999	0.00900901	4	1322	0.00302572	0.00560103	0.00483929	-6.40834	0.00435435	1.47117e-10	1.06825
T375P	14	1836	0.00762527	5	2175	0.00229885	0.00473697	0.00397994	-8.20821	0.0035048	2.24502e-16	1.12444
K376H	6	910	0.00659341	9	1342	0.00670641	0.00666075	0.00666051	-5.9618	0.00450273	2.49468e-09	0.0169653
K376K	10538	355743	0.0296225	13682	539009	0.0253836	0.027069	0.026991	-1.35202	0.00476045	0.17637	0.156596
K376R	20	1378	0.0145138	19	1509	0.0125911	0.0135088	0.0134748	-4.19107	0.00477118	2.77646e-05	0.142327
K376D	8	1393	0.005743	9	1615	0.00557276	0.0056516	0.00565096	-7.01191	0.00397232	2.3508e-12	0.0301234
K376E	1	913	0.00109529	8	1106	0.00723327	0.00445765	0.00308046	-6.47638	0.00448514	9.39488e-11	1.37695
K376C	0	966	0	10	1360	0.00735294	0.00429923	0	-6.91393	0.00422422	4.71423e-12	1.71029
K376M	14	1178	0.0118846	9	1743	0.00516351	0.00787402	0.00722687	-6.04833	0.00423772	1.46357e-09	0.853572
K376N	10	921	0.0108578	12	1393	0.0086145	0.00950735	0.00944571	-5.08753	0.00471698	3.62754e-07	0.23595
K376Q	30	1651	0.0181708	31	2108	0.0147059	0.0162277	0.0161379	-3.65131	0.00473185	0.00026091	0.213519
K376S	6	920	0.00652174	6	1284	0.0046729	0.00544465	0.00537056	-6.34171	0.00442476	2.27236e-10	0.339571
K376T	17	1481	0.0114787	22	2047	0.0107474	0.0110544	0.0110486	-5.19474	0.00432182	2.05001e-07	0.0661541
K376A	4	1704	0.00234742	16	2282	0.00701139	0.00501756	0.0043919	-8.03483	0.00354551	9.3705e-16	0.92953
K376I	9	969	0.00928793	7	1346	0.00520059	0.00691145	0.00662945	-5.93349	0.00448197	2.96571e-09	0.591386
K376L	16	2298	0.00696258	22	3073	0.00715913	0.00707503	0.00707436	-7.57585	0.00348873	3.5677e-14	0.027781
K376V	5	1379	0.00362582	19	1705	0.0111437	0.0077821	0.00674513	-6.18629	0.00415807	6.15957e-10	0.966047
K376F	6	1183	0.00507185	4	1787	0.00223839	0.003367	0.00310049	-8.05309	0.00374243	8.07303e-16	0.841538
K376W	6	1270	0.00472441	10	1565	0.00638978	0.00564374	0.00558135	-6.87198	0.00405435	6.33153e-12	0.295082
K376Y	1	685	0.00145985	15	1099	0.0136488	0.00896861	0.00578553	-4.81277	0.00509821	1.48849e-06	1.35906
K376G	10	911	0.0109769	3	952	0.00315126	0.00697799	0.00580121	-5.4643	0.00485463	4.64729e-08	1.12148
K376P	5	1297	0.00385505	10	1758	0.00568828	0.00490998	0.00482229	-7.38542	0.00387184	1.51973e-13	0.373368
C377H	19	682	0.0278592	16	853	0.0187573	0.0228013	0.0223615	-1.68652	0.00634671	0.0916955	0.399184
C377K	7	455	0.0153846	5	632	0.00791139	0.0110396	0.0104509	-3.57932	0.0062765	0.000344489	0.676949
C377R	4	407	0.00982801	9	623	0.0144462	0.0126214	0.0124065	-3.20931	0.00650726	0.00133055	0.365905
C377D	2	343	0.0058309	5	466	0.0107296	0.00865266	0.00828502	-3.59803	0.00690725	0.000320639	0.566151
C377E	12	954	0.0125786	9	1013	0.0088845	0.0106762	0.0105164	-4.50289	0.00506985	6.7035e-06	0.346015
C377C	10538	355743	0.0296225	13682	539009	0.0253836	0.027069	0.026991	-1.35202	0.00476045	0.17637	0.156596
C377M	20	693	0.02886	7	754	0.00928382	0.0186593	0.0159819	-2.40217	0.00618019	0.0162981	1.04914
C377N	20	1039	0.0192493	30	1445	0.0207612	0.0201288	0.0201149	-2.44094	0.00547998	0.014649	0.0751145
C377Q	7	562	0.0124555	14	829	0.0168878	0.0150971	0.0149333	-3.06009	0.00601555	0.00221273	0.293587
C377S	27	1327	0.0203466	41	1798	0.0228031	0.02176	0.0217257	-2.19308	0.00535555	0.0283017	0.112889
C377T	14	518	0.027027	22	652	0.0337423	0.0307692	0.0305848	-0.374744	0.00730077	0.707851	0.218247
C377A	13	380	0.0342105	11	529	0.020794	0.0264026	0.0256051	-0.934764	0.00759819	0.34991	0.508153
C377I	18	680	0.0264706	13	865	0.0150289	0.0200647	0.0192809	-2.18268	0.00615777	0.0290595	0.570239
C377L	16	689	0.0232221	43	935	0.0459893	0.03633	0.0344156	0.399419	0.00707251	0.689584	0.626678
C377V	25	1159	0.0215703	27	1483	0.0182063	0.0196821	0.0196121	-2.57207	0.00537431	0.0101093	0.170916
C377F	58	1287	0.045066	52	1750	0.0297143	0.03622	0.0354502	0.42578	0.00637606	0.670268	0.423848
C377W	6	1125	0.00533333	13	1453	0.00894701	0.00737005	0.0071389	-5.99129	0.00436218	2.08185e-09	0.490318
C377Y	23	1343	0.0171258	16	1935	0.00826873	0.0118975	0.0111427	-4.82157	0.00448146	1.42435e-06	0.744451
C377G	6	776	0.00773196	33	1106	0.0298373	0.0207226	0.0170979	-2.17014	0.00589017	0.029996	1.06672
C377P	6	1188	0.00505051	7	1566	0.00446999	0.00472041	0.00471174	-7.19483	0.00400075	6.25389e-13	0.12298
I378H	4	1037	0.00385728	7	1474	0.00474898	0.00438072	0.00435813	-7.09001	0.00410781	1.34101e-12	0.203551
I378K	4	865	0.00462428	8	1086	0.00736648	0.00615069	0.00599246	-5.82013	0.00469997	5.8801e-09	0.445837
I378R	6	829	0.00723764	10	1127	0.00887311	0.00817996	0.0081391	-5.1987	0.00487145	2.00691e-07	0.199937
I378D	1	1244	0.000803859	5	1551	0.00322373	0.00214669	0.00173738	-8.48005	0.00369791	2.25103e-17	1.12726
I378E	0	384	0	1	624	0.00160256	0.000992063	0	-5.62045	0.00578478	1.90457e-08	1.61538
I378C	14	1471	0.00951734	32	1912	0.0167364	0.0135974	0.0130938	-4.32552	0.0046024	1.52175e-05	0.530915
I378M	14	614	0.0228013	15	665	0.0225564	0.022674	0.0226736	-1.62541	0.00666366	0.104075	0.0108015
I378N	12	772	0.015544	11	1057	0.0104068	0.0125752	0.0123272	-3.91924	0.00534032	8.88292e-05	0.408521
I378Q	9	664	0.0135542	15	965	0.015544	0.014733	0.0146999	-3.29409	0.00569874	0.000987399	0.135059
I378S	14	1142	0.0122592	12	1604	0.0074813	0.00946832	0.00918706	-5.37511	0.00447188	7.65346e-08	0.504619
I378T	21	866	0.0242494	25	1294	0.0193199	0.0212963	0.0211629	-2.12713	0.00573959	0.0334093	0.231471
I378A	4	741	0.00539811	10	961	0.0104058	0.00822562	0.00781954	-4.93334	0.00512423	8.0837e-07	0.608795
I378I	10538	355743	0.0296225	13682	539009	0.0253836	0.027069	0.026991	-1.35202	0.00476045	0.17637	0.156596
I378L	17	557	0.0305206	39	1028	0.0379377	0.0353312	0.0351455	0.258991	0.00705072	0.795642	0.20993
I378V	52	1509	0.0344599	61	2254	0.027063	0.0300292	0.0298165	-0.599372	0.00579927	0.548925	0.246324
I378F	4	708	0.00564972	10	990	0.010101	0.00824499	0.00792774	-4.92382	0.00513019	8.48695e-07	0.539878
I378W	9	1251	0.00719424	8	1533	0.00521853	0.00610632	0.00602843	-6.63821	0.00412744	3.17505e-11	0.323553
I378Y	0	468	0	7	591	0.0118443	0.00661001	0	-4.44897	0.00604525	8.62811e-06	1.79188
I378G	3	791	0.00379267	13	891	0.0145903	0.00951249	0.00774281	-4.57114	0.00524873	4.85085e-06	1.13511
I378P	5	1179	0.00424088	10	1628	0.00614251	0.00534378	0.00525737	-6.97474	0.00403763	3.06446e-12	0.355857
N379H	16	560	0.0285714	20	839	0.0238379	0.0257327	0.0256304	-1.16242	0.00668646	0.245064	0.18395
N379K	11	427	0.0257611	16	539	0.0296846	0.0279503	0.0278816	-0.736546	0.00754175	0.461398	0.140373
N379R	43	1070	0.0401869	54	1458	0.037037	0.0383703	0.0383389	0.729184	0.00667198	0.465889	0.0820917
N379D	24	997	0.0240722	41	1267	0.0323599	0.0287102	0.0284069	-0.775119	0.00618603	0.43827	0.288667
N379E	8	504	0.015873	8	570	0.0140351	0.0148976	0.0148695	-2.84047	0.00655088	0.00450471	0.123371
N379C	18	772	0.0233161	32	976	0.0327869	0.0286041	0.0282044	-0.752628	0.0065119	0.451674	0.3311
N379M	5	338	0.0147929	12	472	0.0254237	0.0209877	0.0202815	-1.64775	0.00759671	0.0994036	0.506528
N379N	10538	355743	0.0296225	13682	539009	0.0253836	0.027069	0.026991	-1.35202	0.00476045	0.17637	0.156596
N379Q	3	133	0.0225564	7	265	0.0264151	0.0251256	0.0250573	-0.827867	0.0101218	0.407746	0.153576
N379S	21	661	0.03177	21	808	0.0259901	0.0285909	0.0284478	-0.725253	0.00677595	0.468297	0.202161
N379T	7	452	0.0154867	18	637	0.0282575	0.0229568	0.0220156	-1.50606	0.00700393	0.132053	0.556293
N379A	38	1121	0.0338983	36	1206	0.0298507	0.0318006	0.0317364	-0.268282	0.00635359	0.788482	0.127279
N379I	15	1061	0.0141376	26	1312	0.0198171	0.0172777	0.0170398	-3.04999	0.00532049	0.00228849	0.328716
N379L	36	1592	0.0226131	51	1983	0.0257186	0.0243357	0.0242862	-1.68899	0.00542899	0.0912221	0.127613
N379V	20	884	0.0226244	26	1258	0.0206677	0.0214753	0.0214539	-2.08735	0.00576325	0.0368567	0.0911145
N379F	18	580	0.0310345	22	807	0.0272615	0.0288392	0.02878	-0.677596	0.00688601	0.498028	0.130829
N379W	18	686	0.0262391	18	903	0.0199336	0.0226558	0.0224448	-1.72747	0.0062805	0.0840828	0.278318
N379Y	11	737	0.0149254	25	1080	0.0231481	0.0198129	0.0193736	-2.3288	0.00587954	0.0198697	0.415022
N379G	35	1276	0.0274295	69	1821	0.0378913	0.0335809	0.0331684	0.0122309	0.00619168	0.990241	0.31154
N379P	14	780	0.0179487	13	927	0.0140237	0.0158172	0.0156976	-3.10491	0.00569677	0.00190339	0.248146
G380H	5	477	0.0104822	5	563	0.00888099	0.00961538	0.00958253	-3.79743	0.00629104	0.000146207	0.166523
G380K	2	629	0.00317965	5	847	0.00590319	0.00474255	0.00453499	-5.60772	0.00512911	2.05015e-08	0.574277
G380R	9	885	0.0101695	8	1446	0.0055325	0.00729301	0.00697103	-5.81653	0.00450649	6.0083e-09	0.635813
G380D	8	1453	0.00550585	12	2170	0.00552995	0.00552029	0.00552027	-7.52837	0.00371726	5.13781e-14	0.00436643
G380E	1	852	0.00117371	3	1055	0.0028436	0.00209754	0.001915	-7.18645	0.00437039	6.64961e-13	0.796121
G380C	6	995	0.00603015	15	1318	0.0113809	0.00907912	0.00865989	-5.21941	0.00467984	1.79493e-07	0.589345
G380M	4	255	0.0156863	2	363	0.00550964	0.00970874	0.00848432	-3.0474	0.00780875	0.00230828	1.04819
G380N	2	488	0.00409836	6	508	0.011811	0.00803213	0.00703176	-4.04497	0.00629746	5.23307e-05	0.960227
G380Q	1	285	0.00350877	3	392	0.00765306	0.00590842	0.00551137	-3.7803	0.00730014	0.000156639	0.701421
G380S	9	985	0.00913706	20	1417	0.0141143	0.0120733	0.0118091	-4.38783	0.00488439	1.14488e-05	0.412255
G380T	5	908	0.00550661	5	1040	0.00480769	0.00513347	0.00512169	-6.15183	0.00461191	7.65938e-10	0.136149
G380A	9	530	0.0169811	26	820	0.0317073	0.0259259	0.0248137	-1.12109	0.00676059	0.26225	0.56801
G380I	0	511	0	7	734	0.00953678	0.00562249	0	-4.99693	0.00557996	5.82509e-07	1.69619
G380L	2	1123	0.00178094	11	1641	0.00670323	0.00470333	0.00391207	-7.21203	0.00399358	5.51225e-13	1.04655
G380V	6	593	0.010118	7	815	0.00858896	0.00923295	0.00920256	-4.35332	0.00557556	1.34092e-05	0.165612
G380F	3	606	0.0049505	11	879	0.0125142	0.00942761	0.00857131	-4.39241	0.00548163	1.12102e-05	0.802295
G380W	3	709	0.00423131	6	1077	0.00557103	0.00503919	0.00499474	-5.97289	0.00476586	2.33082e-09	0.26586
G380Y	5	792	0.00631313	13	1203	0.0108063	0.00902256	0.00872985	-4.9868	0.00490948	6.13876e-07	0.497995
G380G	10538	355743	0.0296225	13682	539009	0.0253836	0.027069	0.026991	-1.35202	0.00476045	0.17637	0.156596
G380P	48	1132	0.0424028	46	1689	0.0272351	0.0333215	0.0325297	-0.0293484	0.00625715	0.976587	0.455195
E381H	27	588	0.0459184	33	819	0.040293	0.0426439	0.0425549	1.19873	0.00762373	0.230634	0.131914
E381K	20	848	0.0235849	36	1229	0.0292921	0.026962	0.0268117	-1.05946	0.00617599	0.289392	0.211676
E381R	16	610	0.0262295	17	848	0.0200472	0.0226337	0.0224333	-1.69247	0.0064234	0.0905563	0.273147
E381D	13	642	0.0202492	24	995	0.0241206	0.0226023	0.0225211	-1.75028	0.00622921	0.0800706	0.171282
E381E	10538	355743	0.0296225	13682	539009	0.0253836	0.027069	0.026991	-1.35202	0.00476045	0.17637	0.156596
E381C	23	769	0.029909	22	960	0.0229167	0.0260266	0.0257982	-1.17476	0.00636601	0.24009	0.26866
E381M	14	1017	0.013766	34	1463	0.0232399	0.0193548	0.0187487	-2.60889	0.00542388	0.00908359	0.489487
E381N	13	672	0.0193452	20	992	0.0201613	0.0198317	0.0198277	-2.27177	0.00601884	0.0231004	0.0411488
E381Q	24	445	0.0539326	16	650	0.0246154	0.0365297	0.0338565	0.391072	0.00773393	0.695744	0.802558
E381S	22	659	0.0333839	20	978	0.0204499	0.0256567	0.0249101	-1.22156	0.00642495	0.221874	0.504119
E381T	15	728	0.0206044	21	973	0.0215827	0.021164	0.0211585	-2.03195	0.00607354	0.0421586	0.0462265
E381A	17	696	0.0244253	26	1001	0.025974	0.0253388	0.0253273	-1.28603	0.00635002	0.198432	0.0611211
E381I	11	468	0.0235043	19	679	0.0279823	0.0261552	0.0260604	-1.03801	0.00708083	0.299266	0.171211
E381L	34	955	0.0356021	32	1178	0.0271647	0.0309423	0.0306619	-0.400519	0.00639874	0.688774	0.272682
E381V	42	1965	0.021374	66	2598	0.0254042	0.0236686	0.023583	-1.89422	0.00519291	0.0581956	0.170272
E381F	20	804	0.0248756	20	984	0.0203252	0.0223714	0.0222581	-1.83181	0.00607803	0.0669799	0.203404
E381W	12	434	0.0276498	20	639	0.0312989	0.0298229	0.0297682	-0.49632	0.00741906	0.619669	0.12236
E381Y	27	933	0.0289389	39	1198	0.0325543	0.0309714	0.0309189	-0.395799	0.00640168	0.692253	0.116732
E381G	17	508	0.0334646	30	790	0.0379747	0.0362096	0.0361414	0.364885	0.00741164	0.715197	0.124556
E381P	9	499	0.0180361	12	673	0.0178306	0.0179181	0.0179178	-2.38111	0.00654614	0.0172606	0.0114668
Y382H	27	775	0.0348387	28	929	0.0301399	0.032277	0.0321928	-0.1814	0.00677043	0.856053	0.145577
Y382K	16	483	0.0331263	20	708	0.0282486	0.0302267	0.0301336	-0.453001	0.00723719	0.650548	0.161371
Y382R	22	598	0.0367893	19	787	0.0241423	0.0296029	0.028958	-0.562857	0.00693297	0.573533	0.427221
Y382D	11	671	0.0163934	26	1146	0.0226876	0.0203632	0.0201222	-2.22082	0.00591759	0.026363	0.309095
Y382E	28	863	0.032445	23	1047	0.0219675	0.0267016	0.0262003	-1.08533	0.00626867	0.277775	0.39239
Y382C	41	1262	0.0324881	47	1710	0.0274854	0.0296097	0.029508	-0.653026	0.00596525	0.51374	0.168956
Y382M	27	761	0.0354796	30	1078	0.0278293	0.0309951	0.0307716	-0.380951	0.0065889	0.70324	0.246823
Y382N	21	482	0.0435685	18	721	0.0249653	0.032419	0.0312056	-0.147996	0.00733942	0.882346	0.573835
Y382Q	22	706	0.0311615	31	1000	0.031	0.0310668	0.0310667	-0.364116	0.00669658	0.715771	0.00519761
Y382S	21	468	0.0448718	21	719	0.0292072	0.0353833	0.0345952	0.249636	0.00752363	0.802869	0.44271
Y382T	6	310	0.0193548	2	507	0.00394477	0.00979192	0.00721315	-3.41384	0.0069462	0.000640538	1.57375
Y382A	27	565	0.0477876	15	1061	0.0141376	0.0258303	0.0215859	-1.1906	0.00644626	0.233812	1.30274
Y382I	5	576	0.00868056	7	860	0.00813953	0.00835655	0.00835237	-4.59816	0.00546927	4.26233e-06	0.0647421
Y382L	27	1306	0.0206738	37	1789	0.0206819	0.0206785	0.0206785	-2.42838	0.00528197	0.0151663	0.000393261
Y382V	14	801	0.0174782	13	1065	0.0122066	0.0144695	0.0142402	-3.4915	0.00545202	0.000480325	0.364325
Y382F	16	623	0.0256822	31	976	0.0317623	0.0293934	0.0292387	-0.614537	0.00669086	0.538861	0.206853
Y382W	7	359	0.0194986	16	530	0.0301887	0.0258718	0.0253036	-1.0014	0.00762271	0.316633	0.413195
Y382Y	10538	355743	0.0296225	13682	539009	0.0253836	0.027069	0.026991	-1.35202	0.00476045	0.17637	0.156596
Y382G	6	504	0.0119048	29	810	0.0358025	0.0266362	0.0234691	-1.00261	0.00685107	0.31605	0.897188
Y382P	0	727	0	4	1073	0.00372787	0.00222222	0	-6.956	0.00449726	3.50081e-12	1.67754
M383H	1	360	0.00277778	6	506	0.0118577	0.00808314	0.00648606	-3.80666	0.00667831	0.000140858	1.12332
M383K	3	470	0.00638298	8	656	0.0121951	0.00976909	0.00930737	-3.88564	0.00610865	0.000102059	0.594952
M383R	2	587	0.00340716	6	877	0.00684151	0.00546448	0.00517319	-5.38772	0.00520455	7.13561e-08	0.628486
M383D	8	1009	0.00792864	12	1529	0.00784827	0.00788022	0.00788012	-5.78026	0.00443318	7.45835e-09	0.0101996
M383E	0	168	0	1	246	0.00406504	0.00241546	0	-3.45652	0.00899452	0.000547208	1.68293
M383C	85	2565	0.0331384	101	3074	0.0328562	0.0329846	0.0329843	-0.0904231	0.00575719	0.927951	0.00855516
M383M	10538	355743	0.0296225	13682	539009	0.0253836	0.027069	0.026991	-1.35202	0.00476045	0.17637	0.156596
M383N	3	491	0.00610998	5	683	0.00732064	0.00681431	0.00678757	-4.59763	0.00580535	4.27332e-06	0.177665
M383Q	6	644	0.00931677	11	798	0.0137845	0.0117892	0.0115721	-3.80068	0.0057137	0.000144298	0.378965
M383S	28	1281	0.0218579	18	1726	0.0104287	0.0152976	0.0142936	-3.73298	0.00487748	0.00018923	0.747121
M383T	19	933	0.0203644	17	1201	0.0141549	0.0168697	0.0165947	-3.06247	0.00543203	0.00219517	0.368088
M383A	16	1564	0.0102302	20	2319	0.00862441	0.00927118	0.00923841	-5.99384	0.00404315	2.04941e-09	0.1732
M383I	21	639	0.0328638	27	916	0.029476	0.0308682	0.0308237	-0.386591	0.00682113	0.699059	0.109753
M383L	26	845	0.0307692	41	1074	0.038175	0.034914	0.0347166	0.208126	0.00676927	0.83513	0.212116
M383V	51	1381	0.0369298	68	2117	0.0321209	0.0340194	0.0339397	0.0839941	0.00612287	0.933061	0.141356
M383F	5	506	0.00988142	8	637	0.0125589	0.0113736	0.0112941	-3.58064	0.0061809	0.000342752	0.235409
M383W	19	562	0.0338078	15	707	0.0212164	0.0267928	0.0260786	-0.96948	0.00692371	0.332306	0.469956
M383Y	4	310	0.0129032	4	386	0.0103627	0.0114943	0.0114258	-2.92703	0.00751987	0.00342213	0.221026
M383G	6	439	0.0136674	4	550	0.00727273	0.0101112	0.00962313	-3.62726	0.00644947	0.000286442	0.632436
M383P	6	527	0.0113852	15	761	0.0197109	0.0163043	0.0157462	-2.75288	0.0062483	0.00590736	0.510643
S384H	7	238	0.0294118	4	339	0.0117994	0.0190641	0.0171979	-1.69826	0.00850341	0.089458	0.923848
S384K	1	681	0.00146843	7	977	0.00716479	0.00482509	0.00373657	-5.86067	0.00489365	4.61015e-09	1.18057
S384R	5	408	0.0122549	4	469	0.00852878	0.0102623	0.0100954	-3.43016	0.00677605	0.000603236	0.363089
S384D	20	776	0.0257732	41	986	0.0415822	0.0346198	0.0336835	0.162423	0.0068623	0.870973	0.456646
S384E	7	150	0.0466667	2	225	0.00888889	0.024	0.0172549	-0.920897	0.0103216	0.357104	1.57407
S384C	101	2440	0.0413934	97	4133	0.0234696	0.0301232	0.0289723	-0.617168	0.00547974	0.537124	0.595016
S384M	6	722	0.00831025	12	771	0.0155642	0.0120563	0.0114906	-3.78602	0.00566529	0.000153079	0.601675
S384N	26	435	0.0597701	14	679	0.0206186	0.0359066	0.0312428	0.313148	0.00766885	0.754168	1.09037
S384Q	4	691	0.00578871	15	898	0.0167038	0.0119572	0.010536	-3.88914	0.00554054	0.000100598	0.912845
S384S	10538	355743	0.0296225	13682	539009	0.0253836	0.027069	0.026991	-1.35202	0.00476045	0.17637	0.156596
S384T	8	356	0.0224719	3	446	0.00672646	0.0137157	0.01149	-2.73909	0.00722482	0.00616095	1.14799
S384A	3	612	0.00490196	5	852	0.00586854	0.00546448	0.00544323	-5.38772	0.00520455	7.13561e-08	0.176885
S384I	3	800	0.00375	18	1210	0.014876	0.0104478	0.00859599	-4.59678	0.00501599	4.2908e-06	1.06492
S384L	1	250	0.004	3	322	0.00931677	0.00699301	0.00643833	-3.34065	0.00793621	0.000835811	0.760298
S384V	0	133	0	2	220	0.00909091	0.00566572	0	-2.82541	0.00985323	0.00472197	1.60455
S384F	1	597	0.00167504	5	727	0.00687758	0.00453172	0.00363785	-5.411	0.00535454	6.26733e-08	1.14803
S384W	0	158	0	1	209	0.00478469	0.0027248	0	-3.22331	0.0095493	0.00126719	1.75598
S384Y	0	225	0	1	341	0.00293255	0.00176678	0	-4.12116	0.00770133	3.76976e-05	1.65982
S384G	38	3063	0.0124061	59	4569	0.0129131	0.0127096	0.0127072	-5.35648	0.00388231	8.48589e-08	0.0398888
S384P	0	202	0	2	179	0.0111732	0.00524934	0	-2.97848	0.00948664	0.00289679	2.12849
D385H	2	200	0.01	10	262	0.0381679	0.025974	0.0213738	-0.785765	0.00958446	0.432005	1.08447
D385K	12	303	0.039604	9	363	0.0247934	0.0315315	0.0306814	-0.228108	0.00865213	0.819562	0.469707
D385R	1	80	0.0125	5	260	0.0192308	0.0176471	0.0173771	-1.50993	0.0105025	0.131061	0.38141
D385D	10538	355743	0.0296225	13682	539009	0.0253836	0.027069	0.026991	-1.35202	0.00476045	0.17637	0.156596
D385E	24	892	0.0269058	36	1143	0.0314961	0.029484	0.0293948	-0.631851	0.00636404	0.527484	0.155685
D385C	8	348	0.0229885	13	429	0.030303	0.027027	0.0267764	-0.80794	0.00801808	0.419125	0.270637
D385M	6	326	0.0184049	6	403	0.0148883	0.0164609	0.0163692	-2.22876	0.00764741	0.0258298	0.213632
D385N	13	452	0.0287611	27	680	0.0397059	0.0353357	0.0349087	0.240584	0.00760871	0.809877	0.309738
D385Q	12	482	0.0248963	18	732	0.0245902	0.0247117	0.0247112	-1.27707	0.00688565	0.201577	0.0123869
D385S	2	117	0.017094	10	201	0.0497512	0.0377358	0.0335816	0.366793	0.0115343	0.713774	0.865417
D385T	6	183	0.0327869	9	248	0.0362903	0.0348028	0.0347592	0.127247	0.0101977	0.898745	0.100665
D385A	16	478	0.0334728	11	783	0.0140485	0.0214116	0.0195237	-1.82856	0.00661372	0.0674659	0.907185
D385I	5	111	0.045045	3	140	0.0214286	0.0318725	0.0297633	-0.130916	0.012471	0.895842	0.740967
D385L	5	232	0.0215517	4	245	0.0163265	0.0188679	0.0186872	-1.59779	0.00916091	0.110089	0.276935
D385V	2	208	0.00961538	8	398	0.0201005	0.0165017	0.0156059	-2.06895	0.00821843	0.038551	0.635398
D385F	12	485	0.0247423	19	738	0.0257453	0.0253475	0.0253427	-1.18078	0.0069087	0.23769	0.0395696
D385W	5	248	0.0201613	9	347	0.0259366	0.0235294	0.0233516	-1.15794	0.00861508	0.246889	0.245451
D385Y	3	320	0.009375	9	511	0.0176125	0.0144404	0.0138155	-2.65978	0.00716778	0.00781917	0.570449
D385G	28	671	0.0417288	22	923	0.0238353	0.0313676	0.0301719	-0.313733	0.00681321	0.753724	0.570443
D385P	10	184	0.0543478	7	314	0.022293	0.0341365	0.0309857	0.065349	0.00966185	0.947896	0.939018
R386H	32	769	0.0416125	19	997	0.0190572	0.0288788	0.0267761	-0.71017	0.00651441	0.477599	0.781033
R386K	17	678	0.0250737	25	977	0.0255885	0.0253776	0.0253764	-1.27181	0.00639052	0.203442	0.0202852
R386R	10538	355743	0.0296225	13682	539009	0.0253836	0.027069	0.026991	-1.35202	0.00476045	0.17637	0.156596
R386D	16	410	0.0390244	9	549	0.0163934	0.0260688	0.0237523	-0.997244	0.00745688	0.318646	0.868123
R386E	18	703	0.0256046	14	1014	0.0138067	0.0186372	0.0177792	-2.52583	0.00588639	0.0115427	0.633028
R386C	5	282	0.0177305	10	352	0.0284091	0.0236593	0.0230352	-1.16869	0.00842469	0.242529	0.451349
R386M	10	568	0.0176056	16	676	0.0236686	0.0209003	0.0206772	-1.90726	0.00660888	0.0564873	0.290091
R386N	8	216	0.037037	9	360	0.025	0.0295139	0.0289702	-0.443923	0.00899089	0.657098	0.407843
R386Q	0	80	0	5	264	0.0189394	0.0145349	0	-1.83668	0.0103286	0.0662574	1.30303
R386S	62	1770	0.0350282	72	2418	0.0297767	0.0319962	0.0318926	-0.257498	0.00586014	0.796794	0.164131
R386T	30	1257	0.0238663	51	1523	0.0334865	0.0291367	0.0287319	-0.728528	0.00599628	0.46629	0.330174
R386A	17	300	0.0566667	13	482	0.026971	0.0383632	0.0358584	0.568138	0.00855077	0.569941	0.774068
R386I	9	204	0.0441176	7	261	0.0268199	0.0344086	0.0333647	0.0911765	0.00990878	0.927352	0.502715
R386L	8	246	0.0325203	2	341	0.0058651	0.0170358	0.0120232	-1.9726	0.00834909	0.0485417	1.56466
R386V	18	468	0.0384615	21	783	0.0268199	0.0311751	0.0306924	-0.323639	0.00719968	0.746211	0.373427
R386F	2	228	0.00877193	5	249	0.0200803	0.0146751	0.0135161	-2.09838	0.00897365	0.0358719	0.770586
R386W	15	452	0.0331858	13	689	0.0188679	0.0245399	0.0235977	-1.28101	0.00699862	0.200192	0.583455
R386Y	8	370	0.0216216	19	557	0.0341113	0.0291262	0.0284358	-0.568955	0.00769646	0.569387	0.428813
R386G	19	742	0.0256065	15	1075	0.0139535	0.0187122	0.0178795	-2.54937	0.00580261	0.0107919	0.622749
R386P	13	412	0.0315534	10	703	0.0142248	0.0206278	0.0190939	-1.88901	0.00681699	0.0588907	0.840063
G387H	1	304	0.00328947	1	462	0.0021645	0.00261097	0.00255562	-4.60509	0.0067087	4.12281e-06	0.430864
G387K	4	1062	0.00376648	8	1385	0.00577617	0.00490396	0.00479782	-6.8074	0.00420149	9.93786e-12	0.40981
G387R	0	142	0	1	338	0.00295858	0.00208333	0	-3.75965	0.00835765	0.000170153	1.42012
G387D	0	333	0	2	502	0.00398406	0.00239521	0	-4.8398	0.00642794	1.29972e-06	1.66335
G387E	4	487	0.00821355	0	698	0	0.00337553	0	-5.44637	0.00553206	5.14085e-08	2.43326
G387C	1	360	0.00277778	5	470	0.0106383	0.00722892	0.00594195	-3.8943	0.00674736	9.84837e-05	1.08737
G387M	3	299	0.0100334	1	328	0.00304878	0.00637959	0.00538052	-3.57711	0.0075831	0.000347418	1.09485
G387N	0	173	0	2	255	0.00784314	0.0046729	0	-3.21996	0.00895422	0.00128208	1.67843
G387Q	1	345	0.00289855	1	438	0.00228311	0.00255428	0.00253628	-4.66401	0.0066361	3.10099e-06	0.240947
G387S	3	662	0.00453172	2	984	0.00203252	0.00303767	0.002806	-6.40809	0.00475453	1.47351e-10	0.822737
G387T	4	548	0.00729927	6	718	0.00835655	0.00789889	0.00788129	-4.48606	0.00570796	7.25529e-06	0.133851
G387A	0	407	0	3	536	0.00559701	0.00318134	0	-4.95181	0.00612379	7.3527e-07	1.75933
G387I	0	432	0	2	566	0.00353357	0.00200401	0	-5.35345	0.00588427	8.62932e-08	1.76325
G387L	1	158	0.00632911	1	194	0.00515464	0.00568182	0.00565213	-2.8198	0.00986712	0.00480532	0.206708
G387V	1	415	0.00240964	2	503	0.00397614	0.00326797	0.00317053	-4.87236	0.00620585	1.10271e-06	0.47935
G387F	1	613	0.00163132	3	801	0.00374532	0.00282885	0.00261222	-6.05233	0.00506851	1.42768e-09	0.747298
G387W	7	837	0.0083632	11	1262	0.00871632	0.00857551	0.00857376	-5.20701	0.00478771	1.91911e-07	0.0411779
G387Y	5	602	0.00830565	1	796	0.00125628	0.00429185	0.00283344	-5.6047	0.00521229	2.08614e-08	1.6425
G387G	10538	355743	0.0296225	13682	539009	0.0253836	0.027069	0.026991	-1.35202	0.00476045	0.17637	0.156596
G387P	8	1333	0.0060015	5	1701	0.00293945	0.00428477	0.00402219	-7.66258	0.00381339	1.82233e-14	0.714636
L388H	8	295	0.0271186	14	394	0.035533	0.0319303	0.0316506	-0.18362	0.0085765	0.854311	0.263522
L388K	18	555	0.0324324	35	849	0.041225	0.0377493	0.0374954	0.576073	0.00736736	0.564566	0.232919
L388R	11	435	0.0252874	17	679	0.0250368	0.0251346	0.0251344	-1.182	0.00708167	0.237207	0.00996781
L388D	2	197	0.0101523	2	268	0.00746269	0.00860215	0.00850207	-2.83158	0.00879473	0.00463181	0.312666
L388E	3	287	0.010453	8	421	0.0190024	0.0155367	0.0149138	-2.33828	0.00768446	0.0193726	0.550271
L388C	15	535	0.0280374	19	893	0.0212766	0.0238095	0.0235938	-1.48408	0.00653307	0.137786	0.283953
L388M	10	292	0.0342466	16	468	0.034188	0.0342105	0.0342105	0.0837158	0.00842579	0.933282	0.0017112
L388N	14	192	0.0729167	5	268	0.0186567	0.0413043	0.0329555	0.763112	0.0102202	0.445397	1.31366
L388Q	12	365	0.0328767	18	440	0.0409091	0.0372671	0.037049	0.446279	0.00842954	0.655396	0.215535
L388S	23	572	0.0402098	18	807	0.0223048	0.0297317	0.0284812	-0.543119	0.00694777	0.587048	0.602218
L388T	6	331	0.0181269	20	509	0.0392927	0.0309524	0.0289679	-0.318296	0.00802011	0.75026	0.68382
L388A	25	763	0.0327654	21	978	0.0214724	0.0264216	0.0258414	-1.11011	0.00638095	0.266951	0.427416
L388I	4	206	0.0194175	11	314	0.0350318	0.0288462	0.0277294	-0.501362	0.00929269	0.616116	0.541298
L388L	10538	355743	0.0296225	13682	539009	0.0253836	0.027069	0.026991	-1.35202	0.00476045	0.17637	0.156596
L388V	28	809	0.0346106	25	1113	0.0224618	0.0275754	0.026945	-0.938782	0.00631639	0.347842	0.440566
L388F	11	279	0.0394265	8	408	0.0196078	0.0276565	0.0260392	-0.697769	0.00838197	0.485322	0.716602
L388W	23	486	0.0473251	19	713	0.026648	0.0350292	0.0336331	0.20357	0.00748656	0.83869	0.590283
L388Y	16	641	0.024961	22	981	0.0224261	0.0234279	0.0233956	-1.60024	0.00629734	0.109544	0.1082
L388G	22	824	0.026699	17	1200	0.0141667	0.0192688	0.0183365	-2.50503	0.00568312	0.0122441	0.650397
L388P	0	817	0	8	989	0.00808898	0.00442968	0	-6.19836	0.00469083	5.7053e-10	1.82609
A389H	21	796	0.0263819	29	1183	0.0245139	0.0252653	0.0252488	-1.34481	0.00612714	0.178685	0.0739339
A389K	2	479	0.00417537	8	632	0.0126582	0.0090009	0.00784694	-4.02444	0.00608887	5.71119e-05	0.942446
A389R	13	871	0.0149254	22	1400	0.0157143	0.0154117	0.0154069	-3.45716	0.00523361	0.0005459	0.0511892
A389D	3	637	0.00470958	6	1071	0.00560224	0.00526932	0.00525108	-5.79509	0.00487237	6.8284e-09	0.169408
A389E	1	475	0.00210526	10	691	0.0144718	0.00943396	0.00659874	-4.00912	0.00600411	6.09458e-05	1.31085
A389C	13	326	0.0398773	12	493	0.0243408	0.030525	0.0296259	-0.369732	0.00806023	0.711582	0.508977
A389M	16	876	0.0182648	23	1343	0.0171258	0.0175755	0.0175667	-2.93278	0.00543159	0.00335939	0.0648063
A389N	11	314	0.0350318	12	459	0.0261438	0.0297542	0.0294439	-0.459278	0.00816705	0.646034	0.298716
A389Q	6	261	0.0229885	4	355	0.0112676	0.0162338	0.015242	-2.11864	0.0081521	0.0341208	0.722007
A389S	7	272	0.0257353	9	460	0.0195652	0.0218579	0.0216631	-1.47118	0.00791693	0.141243	0.282281
A389T	19	469	0.0405117	17	691	0.024602	0.0310345	0.0300988	-0.336987	0.00733165	0.736127	0.512646
A389A	10538	355743	0.0296225	13682	539009	0.0253836	0.027069	0.026991	-1.35202	0.00476045	0.17637	0.156596
A389I	16	626	0.0255591	10	868	0.0115207	0.0174029	0.0160874	-2.66659	0.00603849	0.00766243	0.806666
A389L	6	811	0.00739827	17	1090	0.0155963	0.0120989	0.011346	-4.08555	0.00523951	4.39734e-05	0.677587
A389V	25	713	0.0350631	27	1131	0.0238727	0.0281996	0.0276983	-0.827448	0.00641199	0.407983	0.39683
A389F	2	399	0.00501253	3	603	0.00497512	0.00499002	0.00498999	-4.69047	0.00607938	2.72584e-06	0.00749635
A389W	2	275	0.00727273	2	323	0.00619195	0.00668896	0.00666743	-3.45426	0.00776322	0.000551806	0.161576
A389Y	2	1009	0.00198216	8	1325	0.00603774	0.00428449	0.00373038	-6.92919	0.00421704	4.23267e-12	0.946571
A389G	6	180	0.0333333	11	346	0.0317919	0.0323194	0.0323112	-0.126093	0.00940389	0.899658	0.0476935
A389P	4	855	0.00467836	8	1416	0.00564972	0.00528402	0.00526236	-6.47325	0.00435965	9.59141e-11	0.183829
L390H	1	677	0.0014771	4	915	0.00437158	0.0031407	0.00275581	-6.28177	0.00483374	3.34744e-10	0.921602
L390K	2	696	0.00287356	3	1052	0.00285171	0.00286041	0.00286039	-6.64023	0.00461501	3.13199e-11	0.00763953
L390R	11	829	0.013269	4	989	0.00404449	0.00825083	0.00695258	-5.04523	0.00500559	4.52984e-07	1.11801
L390D	17	1573	0.0108074	12	2403	0.00499376	0.00729376	0.00677762	-6.88378	0.0038077	5.82832e-12	0.797067
L390E	3	949	0.00316122	10	1356	0.00737463	0.00563991	0.00520328	-6.37753	0.00436928	1.79963e-10	0.74707
L390C	5	370	0.0135135	11	600	0.0183333	0.0164948	0.0163196	-2.46924	0.00688889	0.0135401	0.292202
L390M	33	825	0.04	33	1276	0.0258621	0.0314136	0.0306926	-0.324459	0.00644625	0.745591	0.450057
L390N	3	632	0.00474684	3	749	0.00400534	0.00434468	0.00432909	-5.56078	0.00524396	2.68574e-08	0.170667
L390Q	4	476	0.00840336	2	666	0.003003	0.00525394	0.00461135	-4.90365	0.00576126	9.40704e-07	1.02787
L390S	1	526	0.00190114	5	598	0.0083612	0.00533808	0.00418065	-4.85075	0.00580675	1.22998e-06	1.21019
L390T	2	372	0.00537634	0	379	0	0.00266312	0	-4.55247	0.00677479	5.30194e-06	2.01882
L390A	0	74	0	0	161	0	0	0	-2.84596	0.0117729	0.00442774
L390I	8	284	0.028169	19	481	0.039501	0.0352941	0.0348415	0.211444	0.00846068	0.83254	0.321074
L390L	10538	355743	0.0296225	13682	539009	0.0253836	0.027069	0.026991	-1.35202	0.00476045	0.17637	0.156596
L390V	12	533	0.0225141	9	788	0.0114213	0.015897	0.0150189	-2.85346	0.00617078	0.00432455	0.697787
L390F	1	907	0.00110254	9	1444	0.00623269	0.00425351	0.00319484	-6.96151	0.00420191	3.36645e-12	1.2061
L390W	3	333	0.00900901	3	587	0.00511073	0.00652174	0.00627472	-4.20825	0.00641203	2.57358e-05	0.597736
L390Y	1	379	0.00263852	6	455	0.0131868	0.00839329	0.0063473	-3.69077	0.00680396	0.000223573	1.25675
L390G	3	698	0.00429799	4	861	0.00464576	0.00449006	0.00448671	-5.81225	0.00499206	6.16387e-09	0.0774526
L390P	2	615	0.00325203	7	882	0.00793651	0.00601202	0.00550106	-5.2862	0.00520092	1.24882e-07	0.779184
N391H	2	200	0.01	4	366	0.010929	0.0106007	0.0105912	-2.80816	0.0081564	0.00498259	0.0876321
N391K	5	673	0.00742942	12	874	0.01373	0.010989	0.0105109	-4.07994	0.00551874	4.50467e-05	0.573351
N391R	5	680	0.00735294	28	961	0.0291363	0.0201097	0.0164682	-2.21039	0.00606023	0.0270781	1.08323
N391D	4	468	0.00854701	10	706	0.0141643	0.011925	0.0115809	-3.50514	0.0061567	0.000456366	0.471051
N391E	3	570	0.00526316	5	681	0.00734214	0.00639488	0.00630883	-4.81901	0.00562569	1.44273e-06	0.325101
N391C	16	536	0.0298507	11	744	0.0147849	0.0210938	0.0198424	-1.89049	0.00656517	0.058692	0.714231
N391M	10	639	0.0156495	21	822	0.0255474	0.0212183	0.0206183	-1.94116	0.00632963	0.0522391	0.466483
N391N	10538	355743	0.0296225	13682	539009	0.0253836	0.027069	0.026991	-1.35202	0.00476045	0.17637	0.156596
N391Q	4	206	0.0194175	5	232	0.0215517	0.0205479	0.0205202	-1.35585	0.00955655	0.175148	0.103867
N391S	10	376	0.0265957	12	574	0.0209059	0.0231579	0.0229957	-1.4137	0.00731928	0.15745	0.245697
N391T	21	695	0.0302158	19	887	0.0214205	0.0252845	0.0249153	-1.27354	0.00645498	0.202825	0.347854
N391A	18	739	0.0243572	14	970	0.014433	0.0187244	0.0180981	-2.50524	0.00589994	0.012237	0.530017
N391I	21	1048	0.0200382	26	1308	0.0198777	0.0199491	0.0199489	-2.45087	0.00553113	0.0142511	0.00804509
N391L	18	383	0.0469974	13	474	0.0274262	0.0361727	0.03489	0.324103	0.00823053	0.74586	0.54105
N391V	17	784	0.0216837	28	1066	0.0262664	0.0243243	0.0242166	-1.49088	0.006158	0.135993	0.188402
N391F	15	674	0.0222552	27	1134	0.0238095	0.0232301	0.0232178	-1.67926	0.0061188	0.0931012	0.0669102
N391W	4	286	0.013986	4	450	0.00888889	0.0108696	0.0106008	-3.09455	0.00731466	0.00197112	0.468936
N391Y	18	855	0.0210526	16	1046	0.0152964	0.0178853	0.0176595	-2.75243	0.00567492	0.00591541	0.321843
N391G	16	549	0.0291439	7	622	0.011254	0.0196413	0.0175811	-2.08346	0.00665422	0.037209	0.910828
N391P	4	391	0.0102302	3	699	0.00429185	0.00642202	0.00586092	-4.54451	0.00595953	5.50628e-06	0.924683
D392H	1	200	0.005	3	331	0.00906344	0.00753296	0.0072443	-3.15412	0.00823438	0.00160983	0.539422
D392K	1	225	0.00444444	0	408	0	0.00157978	0	-4.382	0.00728557	1.17594e-05	2.81333
D392R	1	360	0.00277778	3	522	0.00574713	0.00453515	0.00427142	-4.52416	0.00640341	6.06372e-06	0.654741
D392D	10538	355743	0.0296225	13682	539009	0.0253836	0.027069	0.026991	-1.35202	0.00476045	0.17637	0.156596
D392E	1	300	0.00333333	6	421	0.0142518	0.00970874	0.00778612	-3.25418	0.00731257	0.0011372	1.1246
D392C	0	356	0	6	403	0.0148883	0.00790514	0	-3.62972	0.00705289	0.000283728	1.88337
D392M	1	424	0.00235849	4	651	0.00614439	0.00465116	0.00421174	-4.9144	0.00587132	8.9057e-07	0.813969
D392N	0	340	0	4	420	0.00952381	0.00526316	0	-4.09687	0.00689355	4.18767e-05	1.80952
D392Q	1	503	0.00198807	4	537	0.00744879	0.00480769	0.0039322	-4.80827	0.00596835	1.52239e-06	1.13583
D392S	3	522	0.00574713	0	751	0	0.00235664	0	-5.90172	0.00527787	3.59737e-09	2.4387
D392T	2	512	0.00390625	5	763	0.00655308	0.0054902	0.00532376	-5.08016	0.00551458	3.77121e-07	0.482101
D392A	3	532	0.0056391	5	780	0.00641026	0.00609756	0.0060856	-4.98801	0.0054947	6.10057e-07	0.12647
D392I	0	241	0	1	171	0.00584795	0.00242718	0	-3.44691	0.00901618	0.000567032	2.40936
D392L	3	480	0.00625	4	760	0.00526316	0.00564516	0.00562519	-4.98293	0.00559109	6.26287e-07	0.174812
D392V	8	2111	0.00378967	16	2995	0.00534224	0.00470035	0.00463523	-8.8921	0.00323937	5.99638e-19	0.330308
D392F	6	1215	0.00493827	10	1361	0.00734754	0.00621118	0.00609184	-6.42025	0.00425123	1.36051e-10	0.387892
D392W	5	847	0.00590319	11	1097	0.0100273	0.00823045	0.00796034	-5.17257	0.00488629	2.30895e-07	0.501085
D392Y	3	405	0.00740741	2	532	0.0037594	0.00533618	0.00504	-4.48216	0.00628469	7.3893e-06	0.683637
D392G	1	862	0.00116009	15	924	0.0162338	0.00895857	0.00454304	-4.81741	0.00509539	1.45433e-06	1.6826
D392P	1	159	0.00628931	1	239	0.0041841	0.00502513	0.00492395	-3.06791	0.00928321	0.00215562	0.418936
C393H	0	100	0	1	98	0.0102041	0.00505051	0	-2.19233	0.0129792	0.028356	2.02041
C393K	4	396	0.010101	1	505	0.0019802	0.00554939	0.00405258	-4.36275	0.00640782	1.28435e-05	1.46337
C393R	3	542	0.00553506	2	824	0.00242718	0.00366032	0.00336633	-5.7234	0.00521453	1.04411e-08	0.84907
C393D	5	627	0.00797448	2	778	0.00257069	0.00498221	0.00426046	-5.42692	0.00525582	5.73342e-08	1.08462
C393E	2	396	0.00505051	6	462	0.012987	0.00932401	0.00839843	-3.56661	0.00677988	0.000361635	0.85119
C393C	10538	355743	0.0296225	13682	539009	0.0253836	0.027069	0.026991	-1.35202	0.00476045	0.17637	0.156596
C393M	4	158	0.0253165	5	293	0.0170648	0.0199557	0.0195936	-1.43853	0.00941898	0.150283	0.413497
C393N	1	418	0.00239234	4	500	0.008	0.00544662	0.00461713	-4.41952	0.00634878	9.89222e-06	1.02957
C393Q	17	761	0.022339	19	935	0.0203209	0.0212264	0.0212028	-2.01875	0.00608234	0.043513	0.0950783
C393S	247	10040	0.0246016	394	17171	0.0229457	0.0235566	0.0235433	-2.1733	0.00457761	0.0297579	0.0702956
C393T	21	456	0.0460526	19	644	0.0295031	0.0363636	0.0354842	0.370431	0.00771664	0.711061	0.455112
C393A	6	144	0.0416667	9	358	0.0251397	0.0298805	0.0290605	-0.383315	0.00945613	0.701486	0.553104
C393I	3	242	0.0123967	1	280	0.00357143	0.00766284	0.00635919	-3.11185	0.00830448	0.00185917	1.1517
C393L	5	304	0.0164474	11	412	0.026699	0.0223464	0.0217352	-1.39417	0.00800389	0.163266	0.458762
C393V	5	204	0.0245098	5	284	0.0176056	0.0204918	0.0202171	-1.42238	0.00914899	0.154916	0.336924
C393F	5	576	0.00868056	7	739	0.00947226	0.00912548	0.00911696	-4.26772	0.00571257	1.97479e-05	0.0867576
C393W	2	432	0.00462963	3	509	0.00589391	0.0053135	0.00527552	-4.49524	0.00627145	6.94923e-06	0.237937
C393Y	3	799	0.00375469	2	906	0.00220751	0.00293255	0.00283139	-6.54336	0.00467231	6.01518e-11	0.527591
C393G	9	855	0.0105263	17	1326	0.0128205	0.0119211	0.0118669	-4.30766	0.00501062	1.64993e-05	0.192448
C393P	3	278	0.0107914	3	473	0.00634249	0.00798935	0.00772151	-3.59884	0.00709	0.000319634	0.556851
H394H	10538	355743	0.0296225	13682	539009	0.0253836	0.027069	0.026991	-1.35202	0.00476045	0.17637	0.156596
H394K	1	355	0.0028169	4	413	0.00968523	0.00651042	0.00547259	-3.89236	0.00693532	9.92758e-05	1.05498
H394R	3	841	0.00356718	4	983	0.00406918	0.00383772	0.0038295	-6.42331	0.00461871	1.33342e-10	0.130805
H394D	4	1091	0.00366636	10	1478	0.0067659	0.00544959	0.00521582	-6.71189	0.00417998	1.92122e-11	0.568765
H394E	6	1895	0.00316623	18	2712	0.00663717	0.00520946	0.00489513	-8.30079	0.0034088	1.03426e-16	0.666276
H394C	0	496	0	5	732	0.0068306	0.00407166	0	-5.35455	0.00549692	8.57713e-08	1.6776
H394M	3	383	0.0078329	6	512	0.0117188	0.0100559	0.00986304	-3.49558	0.00670827	0.000473033	0.386426
H394N	4	705	0.00567376	5	697	0.0071736	0.0064194	0.00637549	-5.04163	0.00537242	4.61575e-07	0.233642
H394Q	5	1167	0.00428449	8	1521	0.0052597	0.00483631	0.00481166	-7.08029	0.00404911	1.43854e-12	0.201643
H394S	4	585	0.00683761	5	712	0.00702247	0.00693909	0.00693848	-4.75806	0.00558338	1.95459e-06	0.0266411
H394T	0	134	0	0	255	0	0	0	-3.6564	0.00916343	0.000255785
H394A	2	456	0.00438596	1	632	0.00158228	0.00275735	0.00242583	-5.38975	0.00570487	7.05567e-08	1.0168
H394I	0	161	0	1	235	0.00425532	0.00252525	0	-3.36911	0.00919529	0.000754125	1.68511
H394L	1	311	0.00321543	1	432	0.00231481	0.00269179	0.00265617	-4.52416	0.00681085	6.06368e-06	0.33458
H394V	6	855	0.00701754	2	1104	0.00181159	0.00408372	0.00327149	-6.52982	0.0045057	6.58468e-11	1.27481
H394F	1	440	0.00227273	0	339	0	0.0012837	0	-4.90205	0.00657306	9.48435e-07	1.77045
H394W	4	855	0.00467836	13	1039	0.012512	0.00897571	0.00802534	-4.91217	0.0049936	9.00732e-07	0.872763
H394Y	4	1009	0.00396432	5	1415	0.00353357	0.00371287	0.00370687	-7.27194	0.00409688	3.54349e-13	0.116016
H394G	3	831	0.00361011	3	1320	0.00227273	0.0027894	0.00271763	-7.2949	0.00421058	2.98875e-13	0.479451
H394P	2	1131	0.00176835	6	1287	0.004662	0.00330852	0.00296245	-7.43845	0.00405953	1.01875e-13	0.874608
A395H	2	492	0.00406504	7	716	0.00977654	0.00745033	0.0068385	-4.50523	0.00578324	6.63018e-06	0.76661
A395K	1	165	0.00606061	0	220	0	0.0025974	0	-3.31456	0.00932485	0.000917888	2.33333
A395R	4	980	0.00408163	7	1125	0.00622222	0.00522565	0.00511324	-6.30865	0.00448266	2.81484e-10	0.409631
A395D	3	354	0.00847458	9	446	0.0201794	0.015	0.0137461	-2.53363	0.00730382	0.0112889	0.78032
A395E	3	511	0.00587084	3	696	0.00431034	0.004971	0.00491273	-5.09037	0.00560551	3.57356e-07	0.31392
A395C	9	1767	0.00509338	13	2375	0.00547368	0.00531144	0.00530809	-7.97223	0.00353649	1.55838e-15	0.0716012
A395M	3	298	0.0100671	3	516	0.00581395	0.00737101	0.00710821	-3.83608	0.00681272	0.000125012	0.577012
A395N	4	454	0.00881057	3	454	0.00660793	0.00770925	0.00763018	-3.95427	0.00652356	7.67685e-05	0.285714
A395Q	6	926	0.00647948	9	1128	0.00797872	0.00730282	0.0072641	-5.56025	0.00471244	2.69384e-08	0.205296
A395S	3	235	0.012766	7	276	0.0253623	0.0195695	0.0184962	-1.55835	0.0089426	0.119151	0.643674
A395T	4	501	0.00798403	5	754	0.0066313	0.00717131	0.00714141	-4.64028	0.00567506	3.47939e-06	0.188631
A395A	10538	355743	0.0296225	13682	539009	0.0253836	0.027069	0.026991	-1.35202	0.00476045	0.17637	0.156596
A395I	1	207	0.00483092	5	298	0.0167785	0.0118812	0.0100719	-2.50545	0.00863076	0.0122294	1.00559
A395L	6	1304	0.00460123	4	1800	0.00222222	0.00322165	0.00301701	-8.2709	0.00366145	1.32949e-16	0.738443
A395V	0	607	0	2	652	0.00306748	0.00158856	0	-6.08583	0.00524441	1.1589e-09	1.93098
A395F	5	304	0.0164474	4	476	0.00840336	0.0115385	0.0109174	-3.05912	0.00718072	0.00221987	0.697147
A395W	4	1073	0.00372787	5	1354	0.00369276	0.00370828	0.00370824	-7.27752	0.00409437	3.40006e-13	0.00946627
A395Y	8	1301	0.00614912	15	1680	0.00892857	0.00771553	0.00758741	-6.14723	0.00419533	7.88496e-10	0.360242
A395G	8	391	0.0204604	9	674	0.0133531	0.0159624	0.015618	-2.6435	0.00663617	0.00820539	0.445248
A395P	1	334	0.00299401	5	613	0.00815661	0.0063358	0.00572793	-4.29837	0.00632085	1.72061e-05	0.81483
E396H	1	435	0.00229885	4	677	0.00590842	0.0044964	0.00408413	-5.02424	0.00577376	5.05423e-07	0.802768
E396K	7	899	0.00778643	4	1305	0.00306513	0.00499093	0.00448334	-6.50739	0.00438182	7.64682e-11	0.945976
E396R	1	756	0.00132275	5	974	0.00513347	0.00346821	0.00283825	-6.40401	0.00469033	1.51347e-10	1.09876
E396D	11	1050	0.0104762	9	1621	0.00555213	0.00748783	0.00712619	-6.01889	0.00432261	1.75612e-09	0.657609
E396E	10538	355743	0.0296225	13682	539009	0.0253836	0.027069	0.026991	-1.35202	0.00476045	0.17637	0.156596
E396C	0	407	0	0	572	0	0	0	-5.7801	0.00579664	7.46561e-09
E396M	0	507	0	4	957	0.00417973	0.00273224	0	-6.1768	0.00498201	6.54121e-10	1.52978
E396N	0	438	0	8	538	0.0148699	0.00819672	0	-3.97869	0.006361	6.92963e-05	1.81413
E396Q	5	443	0.0112867	1	608	0.00164474	0.00570885	0.003704	-4.63037	0.00600304	3.65013e-06	1.68895
E396S	0	345	0	1	402	0.00248756	0.00133869	0	-4.79296	0.00671119	1.6434e-06	1.85821
E396T	0	359	0	1	484	0.00206612	0.00118624	0	-5.11315	0.00632074	3.1683e-07	1.74174
E396A	2	357	0.00560224	1	466	0.00214592	0.0036452	0.0032538	-4.55806	0.00655102	5.16283e-06	0.948183
E396I	1	170	0.00588235	0	272	0	0.00226244	0	-3.58825	0.00870694	0.000332899	2.6
E396L	0	289	0	5	414	0.0120773	0.00711238	0	-3.64243	0.00724592	0.000270072	1.69807
E396V	7	874	0.00800915	10	1409	0.00709723	0.00744634	0.00743339	-5.7233	0.00455311	1.04472e-08	0.122466
E396F	3	378	0.00793651	6	504	0.0119048	0.0102041	0.0100058	-3.44843	0.00675701	0.00056386	0.388889
E396W	0	376	0	2	575	0.00347826	0.00210305	0	-5.21056	0.00602663	1.88272e-07	1.65391
E396Y	0	470	0	0	624	0	0	0	-6.10728	0.0054861	1.01344e-09
E396G	6	657	0.00913242	5	692	0.00722543	0.00815419	0.00809851	-4.53791	0.00558648	5.68141e-06	0.233866
E396P	1	405	0.00246914	1	563	0.0017762	0.00206612	0.00203865	-5.26269	0.00597394	1.4196e-07	0.335381
I397H	2	528	0.00378788	1	568	0.00176056	0.00273723	0.00254655	-5.41289	0.0056842	6.20172e-08	0.740646
I397K	0	247	0	1	270	0.0037037	0.00193424	0	-3.9193	0.00805524	8.88064e-05	1.91481
I397R	0	209	0	3	306	0.00980392	0.00582524	0	-3.34905	0.00826501	0.000810902	1.68301
I397D	0	207	0	3	329	0.00911854	0.00559701	0	-3.44427	0.00810277	0.000572601	1.62918
I397E	1	305	0.00327869	2	442	0.00452489	0.00401606	0.00396719	-4.29041	0.00687325	1.7834e-05	0.310303
I397C	3	277	0.0108303	2	389	0.00514139	0.00750751	0.00700898	-3.49306	0.00744266	0.000477518	0.757766
I397M	3	229	0.0131004	4	319	0.0125392	0.0127737	0.0127707	-2.47475	0.00837718	0.0133329	0.043938
I397N	4	912	0.00438596	8	1076	0.00743494	0.00603622	0.00583614	-5.89907	0.00465648	3.65552e-09	0.505114
I397Q	1	157	0.00636943	1	231	0.004329	0.00515464	0.00506117	-3.01561	0.00940126	0.00256464	0.395842
I397S	5	323	0.0154799	2	415	0.00481928	0.00948509	0.00803131	-3.32289	0.00722866	0.000890897	1.12393
I397T	18	842	0.0213777	24	1362	0.0176211	0.0190563	0.0189713	-2.60292	0.00555104	0.0092434	0.197128
I397A	7	616	0.0113636	9	1093	0.00823422	0.0093622	0.00924798	-4.63611	0.00520759	3.55024e-06	0.334261
[truncated: 3,168 more rows]

## Sheet: 1h
GAPDH-GAA-ADAR2(E488Q)	GAPDH-GAA-ADAR2(E488Q, N496F)	RAB7A-GAC-ADAR2(E488Q)	RAB7A-GAC-ADAR2(E488Q, N496F)	KRAS-GAG-ADAR2(E488Q)	KRAS-GAG-ADAR2(E488Q, N496F)	RAB7A-GAT-ADAR2(E488Q)	RAB7A-GAT-ADAR2(E488Q, N496F)
[truncated: 3 more rows]

[truncated: 5 more sheets: figure supplement 2a, figure supplement 2b, figure supplement 3a, figure supplement 3b, figure supplement 3c]
