# Supplementary material for: Comprehensive interrogation of the ADAR2 deaminase domain for engineering enhanced RNA editing activity and specificity
Source: eLife. 2022 Jan 19;11:e75555. doi: 10.7554/eLife.75555 (PMC8809894; doi:10.7554/eLife.75555)
Supplement: Figure 2—source data 1. [file elife-75555-fig2-data1.xlsx]

## Sheet: 2c
			BoxB-MS2 adRNA
cluc W85X	NES-MCP-ADAR2 + MS2-MS2 adRNA	ADAR2-LN-NES + BoxB-BoxB adRNA	NES-MCP-AD2	AD2-LN-NES	1	2	3	4	5	6	7	8	9	10	11	12	13	14	15	16	17	18	cluc
2705	484095	738010	83538	34553	60973	28498	15346	2870	24255	21462	2093	2435	114982	150200	99171	135446	10275	2865	1892	2640	17856	23880	2815659
3320	490711	685194	90464	37625	52353	15320	17124	2669	17123	19351	2560	1972	106776	130588	95382	138052	7430	2631	2848	2041	13440	29433	2234218

## Sheet: figure suppplement 1a
cluc w85X	MS2-BoxB	BoxB-MS2	MCP-ADAR2-DDN	ADAR2-DDC-λN	MCP-ADAR2-DDN+ADAR2-DDC-λN	MCP-ADAR2-DDN+MS2-BoxB	ADAR2-DDC-λN+MS2-BoxB	MCP-ADAR2-DDN+ADAR2-DDC-λN+MS2-BoxB	MCP-ADAR2-DDN+BoxB-MS2	ADAR2-DDC-λN+BoxB-MS2	MCP-ADAR2-DDN+ADAR2-DDC-λN+BoxB-MS2	MS2-MS2	MCP-ADAR2	MCP-ADAR2+MS2-MS2	BoxB-BoxB	ADAR2-λN	ADAR2-λN+BoxB-BoxB	cluc
2417	3523	3109	2616	3662	2597	3532	3373	32786	3847	3530	140226	3379	4191	847662	2873	2213	1046814	2432988
2749	2957	3418	3324	2552	4505	5295	4818	25883	4210	2706	112882	3146	3984	745614	3045	2724	793566	3212498

## Sheet: figure supplement 1b
cluc W85X	MCP-ADAR2-DDN+ADAR2-DDC-LN+MS2-MS2	MCP-ADAR2-DDN+ADAR2-DDC-LN+BoxB-BoxB	MCP-ADAR2-DDN+ADAR2-DDC-LN+MS2-BoxB	MCP-ADAR2-DDN+ADAR2-DDC-LN+BoxB-MS2	MCP-ADAR2-DDN+LN-ADAR2-DDC+MS2-MS2	MCP-ADAR2-DDN+LN-ADAR2-DDC+BoxB-BoxB	MCP-ADAR2-DDN+LN-ADAR2-DDC+MS2-BoxB	MCP-ADAR2-DDN+LN-ADAR2-DDC+BoxB-MS2	ADAR2-DDN-MCP+ADAR2-DDC-LN+MS2-MS2	ADAR2-DDN-MCP+ADAR2-DDC-LN+BoxB-BoxB	ADAR2-DDN-MCP+ADAR2-DDC-LN+MS2-BoxB	ADAR2-DDN-MCP+ADAR2-DDC-LN+BoxB-MS2	ADAR2-DDN-MCP+LN-ADAR2-DDC+MS2-MS2	ADAR2-DDN-MCP+LN-ADAR2-DDC+BoxB-BoxB	ADAR2-DDN-MCP+LN-ADAR2-DDC+MS2-BoxB	ADAR2-DDN-MCP+LN-ADAR2-DDC+BoxB-MS2	cluc
2893	4386	9489	4912	45529	2836	3731	3665	8658	2361	16547	6722	7369	2437	2598	4194	4303	1357377
2196	4710	10031	6386	51915	3102	2945	4240	9534	2829	14592	5348	5807	2994	2766	3475	3892	1265639

## Sheet: figure supplement 1c
cluc W85X	SL-TAR adRNA + TBP-ADAR2-DDN	SL-TAR adRNA + ADAR2-DDC-SLBP	SL-TAR adRNA + ADAR2-DDC-SLBP	TAR-TAR adRNA + TBP-ADAR2-DD	SL-SL adRNA + ADAR2-DD-SLBP	cluc
1059	633	1784	13832	29798	31221	3237185
1300	1333	865	18197	22823	27653	1533732
