# Supplementary material for: Comprehensive interrogation of the ADAR2 deaminase domain for engineering enhanced RNA editing activity and specificity
Source: eLife. 2022 Jan 19;11:e75555. doi: 10.7554/eLife.75555 (PMC8809894; doi:10.7554/eLife.75555)
Supplement: Figure 3—source data 1. [file elife-75555-fig3-data1.xlsx]

## Sheet: 3a
		BoxB-MS2 adRNA															MS2-MS2 adRNA
--	GFP	MCP-ADAR2-DDN + ADAR2-DDC-λN	MCP-ADAR2-DDN + ADAR2-DDC(E488Q)-λN	MCP-ADAR2-DDN	ADAR2-DDC-λN	ADAR2-DDC(E488Q)-λN	ADAR2-DDC-λN-P2A-MCP-ADAR2-DDN	ADAR2-DDC(E488Q)-λN-P2A-MCP-ADAR2-DDN	--	MCP-ADAR2-DDN + ADAR2-DDC-λN	MCP-ADAR2-DDN + ADAR2-DDC(E488Q)-λN	ADAR2-DDC-λN-P2A-MCP-ADAR2-DDN	ADAR2-DDC(E488Q)-λN-P2A-MCP-ADAR2_DDN	MCP-ADAR2-DDN	ADAR2-DDC-λN	ADAR2-DDC(E488Q)-λN	MCP-ADAR2-DD	MCP-ADAR2-DD(E488Q)	--	MCP-ADAR2-DD	MCP-ADAR2-DD(E488Q)
0	0	16.27	18.75	0	0	0	16.66	25.39	0	0	0	0	0	0	0	0	37.5	38.89	0	0	0
0	0	14.52	16.88	0	0	0	18.75	22.22	0	0	0	0	0	0	0	0	35.13	36.44	0	0	0
0	0	18.31	18.13	0	0	0	14.62	19.04	0	0	0	0	0	0	0	0	33.88	40.74	0	0	0

## Sheet: 3c
Panel i
293FT	BoxB-MS2 adRNA	BoxB-MS2 adRNA + MCP-ADAR2-DDN + ADAR2-DDC-λN	BoxB-MS2 adRNA + MCP-ADAR2-DDN + ADAR2-DDC(E488Q)-λN	BoxB-MS2 adRNA + ADAR2C-λN-P2A-MCP-ADAR2N	BoxB-MS2 adRNA + ADAR2C(E488Q)-λN-P2A-MCP-ADAR2N	MS2-MS2 adRNA + MCP-ADAR2	MS2-MS2 adRNA + MCP-ADAR2 (E488Q)
0	4.36	16.21	18.36	20	31.57	25.77	37.95
0	0	12.9	19.4	19.44	33.33	32.09	38.47
5.1	0	11.63	21.42	17.37	30	28	41.18
Panel ii
293FT	BoxB-MS2 adRNA	BoxB-MS2 adRNA + MCP-ADAR2-DDN + ADAR2-DDC-λN	BoxB-MS2 adRNA + MCP-ADAR2-DDN + ADAR2-DDC(E488Q)-λN	BoxB-MS2 adRNA + ADAR2C-λN-P2A-MCP-ADAR2N	BoxB-MS2 adRNA + ADAR2C(E488Q)-λN-P2A-MCP-ADAR2N	MS2-MS2 adRNA + MCP-ADAR2	MS2-MS2 adRNA + MCP-ADAR2 (E488Q)
0	0	13.79	13.33	10.63	19.15	21.43	25.04
0	0	10.2	11.23	12.62	17.39	21.96	23.96
0	0	8.89	12.12	14.28	18.19	18.67	24.3

## Sheet: figure supplement 1a
	T	T	G	G	G	A	A	A	T	C	C	A	G	C	T	A	G	C	G	G	C	A	G	T	A	T	T	C	T	G	T
293FT	0	0	0	0	0	0	0	0	0	0	0	0	0	0	0	0	0	0	0	0	0	0	0	0	0	0	0	0	0	0	0
BoxB-MS2 adRNA	0	0	0	0	0	0	0	0	0	0	0	0	0	0	0	0	0	0	0	0	0	0	0	0	0	0	0	0	0	0	0
BoxB-MS2 adRNA + MCP-ADAR2-DDN + ADAR2-DDC-λN	0	0	0	0	0	2.1	3.3	0	0	0	0	0	0	0	0	16.3	0	0	0	0	0	0	0	0	0	0	0	0	0	0	0
BoxB-MS2 adRNA + MCP-ADAR2-DDN + ADAR2-DDC(E488Q)-λN	0	0	0	0	0	4.44	3.9	2.8	0	0	0	0	0	0	0	18.7	0	0	0	0	0	0	0	0	3.5	0	0	0	0	0	0
BoxB-MS2 adRNA + ADAR2C-λN-P2A-MCP-ADAR2N	0	0	0	0	0	4.37	1.6	0	0	0	0	0	0	0	0	18.8	0	0	0	0	0	2.6	0	0	0	0	0	0	0	0	0
BoxB-MS2 adRNA + ADAR2C(E488Q)-λN-P2A-MCP-ADAR2N	0	0	0	0	0	4.08	1.96	0	0	0	0	0	0	0	0	24.6	0	0	0	0	0	3.3	0	0	3.7	0	0	0	0	0	0
MS2-MS2 adRNA + MCP-ADAR2	0	0	0	0	0	10.34	8.19	2.35	0	0	0	0	0	0	0	34.8	0	0	0	0	0	0	0	0	0	0	0	0	0	0	0
MS2-MS2 adRNA + MCP-ADAR2(E488Q)	0	0	0	0	0	14.86	13.51	5.4	0	0	0	2.7	0	0	0	38.9	0	0	0	0	0	2.9	0	0	0	0	0	0	0	0	0
