# Supplementary material for: Comprehensive interrogation of the ADAR2 deaminase domain for engineering enhanced RNA editing activity and specificity
Source: eLife. 2022 Jan 19;11:e75555. doi: 10.7554/eLife.75555 (PMC8809894; doi:10.7554/eLife.75555)
Supplement: Figure 4—source data 1. [file elife-75555-fig4-data1.xlsx]

## Sheet: 4a
--	Split-ADAR2 (E488Q)	Split-ADAR2 (E488Q, N496F)	ADAR2 (E488Q)	ADAR2 (E488Q, N496F)
0	9.1	16.6667	15.7895	24.2222
0	7.31	14.2857	16.6667	23.0769
0	6.11	12.18	15.5	21.42

## Sheet: 4c
293FT	BoxB-MS2 adRNA + MCP-RESCUEN + RESCUEC- λN	MS2-MS2 adRNA + MCP-RESCUE
0.41	5.17	4.78
0.51	5.58	3.45
0.33	4.93	4.83
