# Supplementary material for: Comprehensive interrogation of the ADAR2 deaminase domain for engineering enhanced RNA editing activity and specificity
Source: eLife. 2022 Jan 19;11:e75555. doi: 10.7554/eLife.75555 (PMC8809894; doi:10.7554/eLife.75555)
Supplement: Supplementary file 1. [file elife-75555-supp1.xlsx]

## Sheet: Sheet 1
sample 1	sample 2	total sites considered (A-to-G)	changed sites	median proportion	target site (UAG in the RAB7A 3'UTR)	prop. at chr3:128814202	prop. at chr12:25245361	prop. at chr3:128814241
293FT (73)	GFP (74)	27587	6	0.160498	chr3:128814202	0	-	-
293FT (73)	BoxB-MS2 + MCP-N12 + C12-LN (75)	27587	2	0.0289497	chr3:128814202	0.180451	-	-
293FT (73)	BoxB-MS2 + MCP-N12 + C12(E488Q)-LN (76)	27587	12	0.0752777	chr3:128814202	0.181818	-	-
293FT (73)	BoxB-MS2 + MCP-N12 (77)	27587	41	0.159664	chr3:128814202	0.00649351	-	-
293FT (73)	BoxB-MS2 + C12-LN (78)	27587	171	0.208738	chr3:128814202	0.00657895	-	-
293FT (73)	BoxB-MS2 + C12(E488Q)-LN (79)	27587	7	0.187726	chr3:128814202	0	-	-
293FT (73)	MCP-N12 + C12-LN (81)	27587	10	0.104417	chr3:128814202	0	-	-
293FT (73)	MCP-N12 + C12(E488Q)-LN (82)	27587	122	0.1675	chr3:128814202	0	-	-
293FT (73)	MCP-N12 (83)	27587	77	0.176	chr3:128814202	0	-	-
293FT (73)	C12-LN (84)	27587	130	0.18357	chr3:128814202	0	-	-
293FT (73)	C12(E488Q)-LN (85)	27587	90	0.176035	chr3:128814202	0	-	-
293FT (73)	MS2-MS2 + MCP-AD2 (86)	27587	2075	0.125	chr3:128814202	0.44	-	-
293FT (73)	MS2-MS2 + MCP-AD2(E488Q) (87)	27587	16608	0.155844	chr3:128814202	0.463415	-	-
293FT (73)	MS2-MS2 (88)	27587	31	0.165289	chr3:128814202	0	-	-
293FT (73)	MCP-AD2 (89, 123)	27587	3435	0.134615	chr3:128814202	0	-	-
293FT (73)	MCP-AD2(E488Q) (90, 124)	27587	15767	0.15748	chr3:128814202	0	-	-
293FT (125)	BoxB-MS2 + C12-LN-P2A-MCP-N12 (92)	27587	72	0.200962	chr3:128814202	0.242991	-	-
293FT (125)	BoxB-MS2 + C12(E488Q)-LN-P2A-MCP-N12 (93)	27587	194	0.0997588	chr3:128814202	0.283465	-	-
293FT (125)	C12-LN-P2A-MCP-N12 (94)	27587	19	0.211765	chr3:128814202	0	-	-
293FT (125)	C12(E488Q)-LN-P2A-MCP-N12 (126)	27587	100	0.0663428	chr3:128814202	0	-	-
293FT (125)	BoxB-MS2 (96)	27587	55	0.189055	chr3:128814202	0.0243902	-	-
293FT (142)	MCP-AD2(N496F) (143)	27587	17146	0.157407	chr3:128814202	0.00552486	-	-
293FT (142)	C10(N496F)-LN-P2A-MCP-N10 (144)	27587	87	0.0448505	chr3:128814202	0	-	-
293FT (142)	MS2-MS2 + MCP-AD2(N496F) (145)	27587	19796	0.149388	chr3:128814202	0.393333	-	-
293FT (142)	BoxB-MS2 + C10(N496F)-LN-P2A-MCP-N10 (146)	27587	92	0.0393334	chr3:128814202	0.283582	-	-
sample 1	sample 2	total sites considered (A-to-G)	changed sites	median proportion	target site (UAG in the KRAS CDS)	prop. at chr3:128814202	prop. at chr12:25245361	prop. at chr3:128814241
293FT (125)	BoxB-MS2 (97)	600	29	0.155251	chr12:25245361	-	0	-
293FT (125)	BoxB-MS2 + MCP-N12 + C12-LN (127)	600	112	0.229573	chr12:25245361	-	0.191489	-
293FT (125)	BoxB-MS2 + MCP-N12 + C12(E488Q)-LN (128)	600	102	0.204889	chr12:25245361	-	0.241379	-
293FT (125)	BoxB-MS2 + C12-LN-P2A-MCP-N12 (129)	600	332	0.253745	chr12:25245361	-	0.151515	-
293FT (125)	BoxB-MS2 + C12(E488Q)-LN-P2A-MCP-N12 (130)	600	119	0.0787879	chr12:25245361	-	0.459459	-
sample 1	sample 2	total sites considered (A-to-G)	changed sites	median proportion	target site (ACG in the RAB7A 3'UTR)	prop. at chr3:128814202	prop. at chr12:25245361	prop. at chr3:128814241
293FT (147)	BoxB-MS2-CU + N10-C10-RESCUE (148)	13316	53	0.0270112	chr3:128814241	-	-	-
293FT (147)	MS2-MS2-CU + MCP-RESCUE (149)	13316	13316	0.163265	chr3:128814241	-	-	-
sample 1	sample 2	total sites considered (C-to-U)	changed sites	median proportion	target site (ACG in the RAB7A 3'UTR)	prop. at chr3:128814202	prop. at chr12:25245361	prop. at chr3:128814241
293FT (147)	BoxB-MS2-CU + N10-C10-RESCUE (148)	865	0		chr3:128814241	-	-	0.080292
293FT (147)	MS2-MS2-CU + MCP-RESCUE (149)	865	865	0.121212	chr3:128814241	-	-	0.0228571
